# Supplementary material for: Palladium-catalyzed synthesis of nitriles fromN-phthaloyl hydrazones
Source: Royal Society of Chemistry journal article supplement (doi:10.1039/d2cc00342b), 2022-01-01

## Supplementary Information

### Palladium-catalyzed synthesis of nitriles from *N*-phthaloyl hydrazones

Yusuke Ano,<sup>\*,†</sup> Masaya Higashino, Yuki Yamada, and Naoto Chatani

*Department of Applied Chemistry, Faculty of Engineering, Osaka University, Suita, Osaka 565-0871, Japan*

<sup>†</sup> *Center for Atomic and Molecular Technologies, Graduate School of Engineering, Osaka University, Suita, Osaka 565-0871, Japan*

*ano@chem.eng.osaka-u.ac.jp*

#### Table of Contents

|                                                                                                          |         |
|----------------------------------------------------------------------------------------------------------|---------|
| 1. General Information                                                                                   | S2      |
| 2. Materials                                                                                             | S2–S10  |
| 3. General Procedure for the Pd-Catalyzed Transformation of <i>N</i> -Phthaloyl Hydrazones into Nitriles | S10     |
| 4. Optimization Studies                                                                                  | S11     |
| 5. Characterization of Products                                                                          | S12–S18 |
| 6. Large-Scale Preparation of <b>2a</b>                                                                  | S18–S19 |
| 7. Mechanistic Studies                                                                                   | S19–S21 |
| 8. References                                                                                            | S21     |
| 9. Copies of <sup>1</sup> H, <sup>13</sup> C, and <sup>19</sup> F NMR Spectra                            | S22–S77 |

## 1. General Information

$^1\text{H}$ ,  $^2\text{H}$ ,  $^{13}\text{C}$ , and  $^{19}\text{F}$  NMR spectra were recorded on a JEOL ECZ-400 spectrometer. The chemical shifts in  $^1\text{H}$  NMR spectra were recorded relative to tetramethylsilane ( $\delta$ : 0.0). The chemical shifts in  $^2\text{H}$  NMR spectra were recorded relative to  $\text{CDCl}_3$  ( $\delta$ : 7.26). The chemical shifts in  $^{13}\text{C}$  NMR spectra were recorded relative to  $\text{CDCl}_3$  ( $\delta$ : 77.16). The chemical shifts in  $^{19}\text{F}$  NMR spectra were recorded relative to  $\text{CFCl}_3$  ( $\delta$ : 0.0). Data are recorded as follows: chemical shifts in ppm ( $\delta$ ), multiplicity (s = singlet, d = doublet, t = triplet, q = quartet, quint = quintet, br = broad singlet, m = multiplet, c = complex), coupling constant (Hz), and integration. Infrared spectra (IR) were recorded on a JASCO FT/IR-4000 spectrometer using the ATR method. Absorption data are reported in reciprocal centimeters from 800 to  $3500\text{ cm}^{-1}$  with the following relative intensities: s (strong), m (medium), or w (weak). Mass spectra were obtained using a SHIMADZU QP-2010 or QP-2020NX spectrometer with a quadrupole mass analyzer at 70 eV. Data were recorded as follows: mass/charge ratio ( $m/z$ ) and relative intensity to the base peak at 100 %. High-resolution mass spectra (HRMS) were obtained using a JEOL JMS-T100LP spectrometer with a time-of-flight mass analyzer. Melting points were determined on a Stanford Research Systems MPA100 apparatus equipped with a digital thermometer and are uncorrected. Preparative gel permeation chromatography (GPC) were carried out on a JAI LC-5060 equipped with two JAIGEL-2HR columns connected in series or two JAIGEL-2HR-40 columns connected in series. High-pressure liquid chromatography (HPLC) was performed with a SHIMADZU LC-20AR equipped with a SHIMADZU SPD-20A (UV Detector,  $\lambda = 254\text{ nm}$ ) and Phenomenex Luna® Silica ( $5\ \mu\text{m}$ ,  $210 \times 21.2\text{ mm}$ ).

## 2. Materials

Toluene (dehydrated, –Super<sup>2</sup> Plus–) [CAS RN: 108-88-3] was purchased from Kanto Chemical Co, Inc. and was purified by passage through activated alumina using a GlassContour Solvent Dispensing System. (IMes)Pd(allyl)Cl [CASRN: 478980-04-0] and (IPr)Pd(allyl)Cl [CAS RN: 478980-03-9] were purchased from Umicore and used as received. IMes·HCl [CAS RN: 141556-45-8], IPr·HCl [CAS RN: 250285-32-6], and *t*-BuOK [CAS RN: 865-47-4] were purchased from Tokyo Chemical Industry Co., Ltd. and used as received. Starting materials were prepared as described below.

### General Procedure for the Preparation of *N*-Phthaloyl Hydrazones **1**

A two necked flask equipped with a Dean-Stark trap and a magnetic stirring bar was dried with a heat gun and purged with  $\text{N}_2$ . After allowing the flask to cool to room temperature, *N*-aminophthalimide (1 equiv), the aldehyde (1.05 equiv), TsOH·H<sub>2</sub>O (5 mol%), and toluene (0.25 M) were added. The resulting mixture was then refluxed overnight. After allowing the mixture to cool to room temperature, the resulting precipitated *N*-phthaloyl hydrazone **2** was collected on a filter and the crude product was purified by recrystallization from toluene or EtOAc.

(*E*)-2-[(Naphthalen-2-ylmethylene)amino]isoindoline-1,3-dione (**1a**) [CAS RN: 82408-29-5].

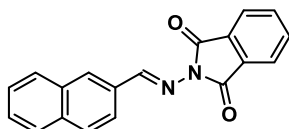

This compound was prepared on a 10 mmol scale. White solid (2.20 g, 73%).  $R_f = 0.27$  (hexane/EtOAc = 3/1).  $M_p = 199.2\text{--}199.8\text{ }^\circ\text{C}$ .  $^1\text{H NMR}$  ( $\text{CDCl}_3$ , 400 MHz):  $\delta$  9.58 (s, 1H), 8.19–8.17 (c, 2H), 7.97–7.87 (c, 5H), 7.82–7.77 (m, 2H), 7.59–7.52 (c, 2H).  $^{13}\text{C NMR}$  ( $\text{CDCl}_3$ , 101 MHz):  $\delta$  165.3, 158.4, 135.2, 134.8, 133.1, 131.5, 131.3, 130.4, 128.9, 128.8, 128.1, 127.8, 126.8, 123.9, 123.3. IR (ATR): 3084 w, 3059 w, 1789 w, 1714 s, 1605 w, 1467 w, 1366 m, 1347 m, 1304 s, 1113 m, 1082 m. MS (EI, relative intensity, %)  $m/z$ : 300 ( $M^+$ , 31), 154 (14), 153 (100), 139 (14), 104 (20), 76 (18). HRMS (DART)  $m/z$ :  $[M + H]^+$  Calcd for  $\text{C}_{19}\text{H}_{13}\text{N}_2\text{O}_2$  301.09715; Found 301.09665.

**(E)-2-[(4-Methylbenzylidene)amino]isoindoline-1,3-dione (1b) [CAS RN: 32386-99-5].**

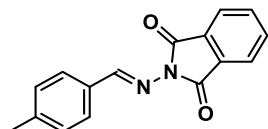

This compound was prepared on a 3 mmol scale. White solid (0.40 g, 50%).  $R_f = 0.31$  (hexane/EtOAc = 3/1).  $M_p = 161.3\text{--}161.8\text{ }^\circ\text{C}$ .  $^1\text{H NMR}$  ( $\text{CDCl}_3$ , 400 MHz):  $\delta$  9.33 (s, 1H), 7.95–7.90 (m, 2H), 7.79 (d,  $J = 8.2$  Hz, 2H), 7.80–7.76 (m, 2H), 7.27 (d,  $J = 8.0$  Hz, 2H), 2.42 (s, 3H).  $^{13}\text{C NMR}$  ( $\text{CDCl}_3$ , 101 MHz):  $\delta$  165.3, 159.2, 142.5, 134.7, 131.0, 130.5, 129.7, 128.6, 123.9, 21.8. IR (ATR): 2920 w, 1771 w, 1720 s, 1609 w, 1465 w, 1364 m, 1304 s, 1117 m. MS (EI, relative intensity, %)  $m/z$ : 264 ( $M^+$ , 17), 148 (26), 130 (18), 118 (24), 117 (100), 105 (50), 104 (37), 77 (10), 76 (29). HRMS (DART)  $m/z$ :  $[M + H]^+$  Calcd for  $\text{C}_{16}\text{H}_{13}\text{N}_2\text{O}_2$  265.09715; Found 265.09611.

**(E)-2-[(4-Methoxybenzylidene)amino]isoindoline-1,3-dione (1c) [CAS RN: 19279-70-0].**

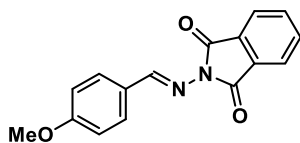

This compound was prepared on a 3 mmol scale. Light yellow solid (0.71 g, 85%).  $R_f = 0.24$  (hexane/EtOAc = 2/1).  $M_p = 188.3\text{--}188.7\text{ }^\circ\text{C}$ .  $^1\text{H NMR}$  ( $\text{CDCl}_3$ , 400 MHz):  $\delta$  9.25 (s, 1H), 7.94–7.89 (m, 2H), 7.87–7.83 (m, 2H), 7.80–7.75 (m, 2H), 6.99–6.95 (m, 2H), 3.88 (s, 3H).  $^{13}\text{C NMR}$  ( $\text{CDCl}_3$ , 101 MHz):  $\delta$  165.3, 162.7, 159.1, 134.6, 130.5, 130.4, 126.3, 123.8, 114.3, 55.6. IR (ATR): 3006 w, 2935 w, 2844 w, 1718 s, 1603 m, 1513 m, 1372 m, 1305 s, 1252 s, 1166 m, 1117 m, 1026 m. MS (EI, relative intensity, %)  $m/z$ : 280 ( $M^+$ , 28), 134 (14), 133 (100), 105 (13), 104 (20), 103 (13), 76 (17). HRMS (DART)  $m/z$ :  $[M + H]^+$  Calcd for  $\text{C}_{16}\text{H}_{13}\text{N}_2\text{O}_3$  281.09207; Found 281.09233.

**(E)-2-[(4-(Trifluoromethyl)benzylidene)amino]isoindoline-1,3-dione (1d) [CAS RN: 386275-75-8].**

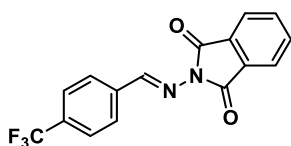

This compound was prepared on a 3.4 mmol scale. White solid (1.02 g, 95%).  $R_f = 0.28$  (hexane/EtOAc = 3/1).  $M_p = 240.6\text{--}240.9\text{ }^\circ\text{C}$ .  $^1\text{H NMR}$  ( $\text{CDCl}_3$ , 400 MHz):  $\delta$  9.57 (s, 1H), 8.02 (d,  $J = 8.2$  Hz, 2H), 7.98–7.93 (m, 2H), 7.84–7.79 (m, 2H), 7.72 (d,  $J = 8.0$  Hz, 2H).  $^{13}\text{C NMR}$  ( $\text{CDCl}_3$ , 101 MHz):  $\delta$  165.2, 155.7, 137.2, 135.0, 133.1 (q,  $J = 32.8$  Hz), 130.3, 128.6, 125.9 (q,  $J = 3.5$  Hz), 124.1, 123.9 (q,  $J = 272.6$  Hz).  $^{19}\text{F NMR}$  (376 MHz,  $\text{CDCl}_3$ ):  $\delta$  -62.8. IR

(ATR): 1773 w, 1721 s, 1613 w, 1468 w, 1374 w, 1299 s, 1158 m, 1116 s. MS (EI, relative intensity, %)  $m/z$ : 318 ( $M^+$ , 5), 147 (55), 105 (100), 104 (51), 76 (36). HRMS (DART)  $m/z$ :  $[M + H]^+$  Calcd for  $C_{16}H_{10}N_2O_2F_3$  319.06889; Found 319.06654.

**Methyl (*E*)-4-[[1,3-Dioxoisindolin-2-yl]imino]methyl}benzoate (1e) [CAS RN: 159022-76-1].**

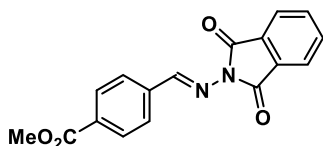

This compound was prepared on a 10 mmol scale. White solid (2.47 g, 80%).  $R_f$  = 0.21 (hexane/EtOAc = 3/1). Mp = 221.6–222.0 °C.  $^1H$  NMR ( $CDCl_3$ , 400 MHz):  $\delta$  9.55 (s, 1H), 8.13 (dt,  $J$  = 8.5, 1.7 Hz, 2H), 7.99–7.92 (c, 4H), 7.83–7.79 (m, 2H), 3.95 (s, 3H).  $^{13}C$  NMR ( $CDCl_3$ , 101 MHz):  $\delta$  166.6, 165.1, 156.4, 137.9, 135.0, 132.7, 130.3, 130.1, 128.3, 124.1, 52.5. IR (ATR): 3071 w, 2953 w, 1773 w, 1712 s, 1608 w, 1433 w, 1350 m, 1279 s, 1098 m. MS (EI, relative intensity, %)  $m/z$ : 308 ( $M^+$ , 11), 162 (12), 161 (36), 160 (17), 147 (29), 130 (50), 105 (100), 104 (57), 76 (36). HRMS (DART)  $m/z$ :  $[M + H]^+$  Calcd for  $C_{17}H_{13}N_2O_4$  309.08698; Found 309.08504.

**(*E*)-2-[(3-Methoxybenzylidene)amino]isoindoline-1,3-dione (1f) [CAS RN: 32387-03-4].**

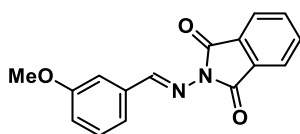

This compound was prepared on a 3 mmol scale. Light yellow solid (0.49 g, 58%).  $R_f$  = 0.20 (hexane/EtOAc = 3/1). Mp = 147.6–148.2 °C.  $^1H$  NMR ( $CDCl_3$ , 400 MHz):  $\delta$  9.36 (s, 1H), 7.96–7.91 (m, 2H), 7.82–7.77 (m, 2H), 7.48 (dd,  $J$  = 2.6, 1.5 Hz, 1H), 7.42 (dt,  $J$  = 7.7, 1.3 Hz, 1H), 7.37 (t,  $J$  = 7.8 Hz, 1H), 7.05 (ddd,  $J$  = 8.0, 2.6, 1.2 Hz, 1H), 3.89 (s, 3H).  $^{13}C$  NMR ( $CDCl_3$ , 101 MHz):  $\delta$  165.2, 160.0, 158.8, 135.0, 134.8, 130.4, 129.9, 123.9, 122.0, 118.7, 111.7, 55.6. IR (ATR): 3098 w, 3031 w, 2968 w, 2837 w, 1718 s, 1598 m, 1370 m, 1308 s. MS (EI, relative intensity, %)  $m/z$ : 280 ( $M^+$ , 19), 134 (12), 133 (100), 105 (24), 104 (27), 103 (15), 76 (22). HRMS (DART)  $m/z$ :  $[M + H]^+$  Calcd for  $C_{16}H_{13}N_2O_3$  281.09207; Found 281.09052.

**(*E*)-2-[(3-Fluoro-4-methylbenzylidene)amino]isoindoline-1,3-dione (1g).**

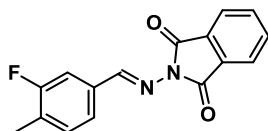

This compound was prepared on a 10 mmol scale. White solid (2.10 g, 74%).  $R_f$  = 0.23 (hexane/ $CHCl_3$  = 3/1). Mp = 177.7–178.2 °C.  $^1H$  NMR ( $CDCl_3$ , 400 MHz):  $\delta$  9.37 (d,  $J$  = 0.7 Hz, 1H), 7.95–7.91 (m, 2H), 7.81–7.77 (m, 2H), 7.61 (dd,  $J$  = 10.2, 1.5 Hz, 1H), 7.51 (dd,  $J$  = 7.8, 1.6 Hz, 1H), 7.27 (t,  $J$  = 7.8 Hz, 1H), 2.34 (d,  $J$  = 1.8 Hz, 3H).  $^{13}C$  NMR ( $CDCl_3$ , 101 MHz):  $\delta$  165.1, 161.6 (d,  $J$  = 245.6 Hz), 157.1, 134.8, 133.5 (d,  $J$  = 7.7 Hz), 131.8 (d,  $J$  = 5.3 Hz), 130.4, 129.1 (d,  $J$  = 17.8 Hz), 124.5 (d,  $J$  = 2.9 Hz), 123.9, 114.0 (d,  $J$  = 23.6 Hz), 14.9 (d,  $J$  = 3.4 Hz).  $^{19}F$  NMR (376 MHz,  $CDCl_3$ ):  $\delta$  -117.1 (t,  $J$  = 8.7 Hz). IR (ATR): 3044 w, 2926 w, 2859 w, 1714 s, 1564 w, 1417 w, 1359 m,

1338 m, 1306 s, 1127 s, 1083 m. MS (EI, relative intensity, %)  $m/z$ : 282 ( $M^+$ , 19), 262 (28), 148 (54), 136 (19), 135 (91), 130 (33), 105 (100), 104 (67). HRMS (DART)  $m/z$ :  $[M + H]^+$  Calcd for  $C_{16}H_{12}N_2O_2F$  283.08773 Found 283.08819.

**(E)-2-[(2-Fluoro-5-methylbenzylidene)amino]isoindoline-1,3-dione (1h).**

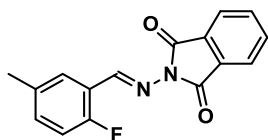

This compound was prepared on a 5 mmol scale. White solid (1.30 g, 92%).  $R_f$  = 0.29 (hexane/EtOAc = 3/1). Mp = 163.9–164.2 °C.  $^1H$  NMR ( $CDCl_3$ , 400 MHz):  $\delta$  9.63 (s, 1H), 7.99 (dd,  $J$  = 6.6, 2.1 Hz, 1H), 7.96–7.92 (m, 2H), 7.82–7.77 (m, 2H), 7.28–7.24 (m, 1H), 7.02 (dd,  $J$  = 10.1, 8.5 Hz, 1H), 2.37 (s, 3H).  $^{13}C$  NMR ( $CDCl_3$ , 101 MHz):  $\delta$  165.0, 160.6 (d,  $J$  = 251.4 Hz), 152.1 (d,  $J$  = 5.8 Hz), 134.8, 134.12 (d,  $J$  = 3.9 Hz), 134.11 (d,  $J$  = 7.7 Hz), 130.2, 127.0, 123.8, 121.0 (d,  $J$  = 9.6 Hz), 115.6 (d,  $J$  = 21.2 Hz), 20.6.  $^{19}F$  NMR (376 MHz,  $CDCl_3$ ):  $\delta$  -124.7 (quint,  $J$  = 5.1 Hz). IR (ATR): 3057 w, 2931 w, 1727 s, 1491 m, 1303 s, 1249 m, 1212 m, 1110 m. MS (EI, relative intensity, %)  $m/z$ : 282 ( $M^+$ , 25), 148 (47), 136 (17), 135 (81), 130 (25), 105 (100), 104 (57), 76 (45). HRMS (DART)  $m/z$ :  $[M + H]^+$  Calcd for  $C_{19}H_{13}N_2O_2$  283.08773; Found 283.08746.

**(E)-2-[(Pyridin-3-ylmethylene)amino]isoindoline-1,3-dione (1i) [CAS: 321689-83-2].**

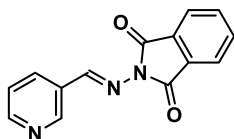

This compound was prepared on a 9 mmol scale. White solid (1.83 g, 81%).  $R_f$  = 0.13 (hexane/EtOAc = 3/1). Mp = 174.8–175.4 °C.  $^1H$  NMR ( $CDCl_3$ , 400 MHz):  $\delta$  9.56 (s, 1H), 8.98 (d,  $J$  = 1.6 Hz, 1H), 8.72 (dd,  $J$  = 4.9, 1.7 Hz, 1H), 8.38 (dt,  $J$  = 8.0, 1.9 Hz, 1H), 7.98–7.93 (m, 2H), 7.84–7.79 (m, 2H), 7.45 (dd,  $J$  = 8.0, 4.8 Hz, 1H).  $^{13}C$  NMR ( $CDCl_3$ , 101 MHz):  $\delta$  165.1, 154.7, 152.4, 150.5, 135.0, 134.4, 130.3, 130.0, 124.1, 124.0. IR (ATR): 2927 w, 1720 s, 1595 w, 1378 w, 1351 w, 1309 m, 1119 w. MS (EI, relative intensity, %)  $m/z$ : 251 ( $M^+$ , 4), 148 (16), 147 (18), 105 (100), 104 (50), 76 (37). HRMS (DART)  $m/z$ :  $[M + H]^+$  Calcd for  $C_{14}H_{10}N_3O_2$  252.07675; Found 252.07652.

**(E)-2-[[1H-Indol-2-yl)methylene]amino]isoindoline-1,3-dione (1j).**

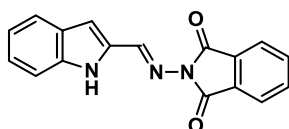

This compound was prepared on a 1.4 mmol scale. White solid (0.33 g, 81%).  $R_f$  = 0.36 (hexane/EtOAc = 2/1). Mp = 249.5–249.9 °C.  $^1H$  NMR ( $CDCl_3$ , 400 MHz):  $\delta$  9.50 (s, 1H), 9.21 (brs, 1H), 7.96–7.91 (m, 2H), 7.82–7.78 (m, 2H), 7.67 (dd,  $J$  = 8.0, 0.9 Hz, 1H), 7.41 (dd,  $J$  = 8.2, 0.9 Hz, 1H), 7.33–7.29 (m, 1H), 7.16–7.12 (m, 1H), 6.99 (dd,  $J$  = 2.1, 0.8 Hz, 1H).  $^{13}C$  NMR ( $CDCl_3$ , 101 MHz):  $\delta$  165.4, 148.4, 137.6, 134.9, 132.4, 130.4, 128.2, 125.5, 123.9, 122.0, 120.7, 111.7, 111.2. IR (ATR): 3413 m, 3060 w, 1707 s, 1601 m, 1334 s, 1306 s, 1117 s. MS (EI, relative intensity, %)  $m/z$ : 290 (20), 289( $M^+$ , 94), 143 (12), 142 (100), 115 (12), 104 (19), 102 (14). HRMS (DART)  $m/z$ :  $[M$

+ H]<sup>+</sup> Calcd for C<sub>17</sub>H<sub>12</sub>N<sub>3</sub>O<sub>2</sub> 290.09240; Found 290.09342.

**(E)-2-[(Benzofuran-2-ylmethylene)amino]isoindoline-1,3-dione (1k).**

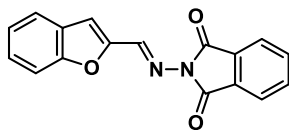

This compound was prepared on a 5 mmol scale. Pale yellow solid (1.1 g, 72%). *R<sub>f</sub>* = 0.57 (hexane/EtOAc = 1/1). *Mp* = 217.8–218.3 °C. <sup>1</sup>H NMR (CDCl<sub>3</sub>, 400 MHz): δ 9.55 (s, 1H), 7.97–7.93 (m, 2H), 7.83–7.78 (m, 2H), 7.66 (ddd, *J* = 7.8, 1.2, 0.8 Hz, 1H), 7.61 (ddd, *J* = 8.3, 1.7, 0.9 Hz, 1H), 7.44–7.40 (m, 1H), 7.31–7.26 (m, 1H), 7.29 (d, *J* = 0.9 Hz, 1H). <sup>13</sup>C NMR (CDCl<sub>3</sub>, 101 MHz): δ 165.0, 156.1, 150.4, 146.2, 134.9, 130.3, 127.8, 127.3, 124.0, 123.7, 122.2, 113.7, 112.3. IR (ATR): 3050 w, 1787 w, 1713 s, 1604 w, 1369 m, 1339 m, 1301 s, 1111 m, 1081 m. MS (EI, relative intensity, %) *m/z*: 290 (M<sup>+</sup>, 42), 144 (11), 143 (100), 105 (14), 104 (26), 102 (11), 76 (27). HRMS (DART) *m/z*: [M + H]<sup>+</sup> Calcd for C<sub>17</sub>H<sub>11</sub>N<sub>2</sub>O<sub>3</sub> 291.07642; Found 291.07660.

**(E)-2-[(Benzo[*b*]thiophen-2-ylmethylene)amino]isoindoline-1,3-dione (1l).**

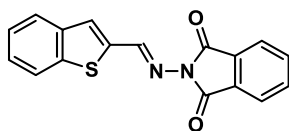

This compound was prepared on a 10 mmol scale. Yellow solid (2.4 g, 80%). *R<sub>f</sub>* = 0.29 (hexane/EtOAc = 2/1). *Mp* = 282.1–282.6 °C. <sup>1</sup>H NMR (CDCl<sub>3</sub>, 400 MHz): δ 9.73 (s, 1H), 7.96–7.92 (m, 2H), 7.88–7.78 (m, 4H), 7.73 (s, 1H), 7.36–7.45 (c, 2H). <sup>13</sup>C NMR (CDCl<sub>3</sub>, 101 MHz): δ 165.0, 152.3, 141.3, 139.4, 139.2, 134.9, 130.5, 130.4, 126.8, 124.9, 124.8, 124.0, 122.9. IR (ATR): 3051 w, 1787 w, 1714 s, 1577 w, 1519 w, 1367 s, 1296 s, 1230 m, 1111 s, 1081 m. MS (EI, relative intensity, %) *m/z*: 306 (M<sup>+</sup>, 37), 159 (100), 104 (20), 102 (10), 76 (22). HRMS (DART) *m/z*: [M + H]<sup>+</sup> Calcd for C<sub>17</sub>H<sub>11</sub>N<sub>2</sub>O<sub>2</sub>S 307.05357; Found 307.05364.

**(E)-2-[(phenanthren-9-ylmethylene)amino]isoindoline-1,3-dione (1m).**

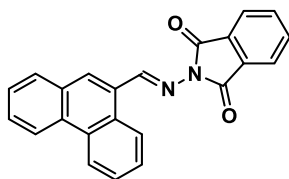

This compound was prepared on a 4.2 mmol scale. Pale yellow solid (1.24 g, 88%). *R<sub>f</sub>* = 0.36 (hexane/EtOAc = 2/1). *Mp* = 238.3–238.6 °C. <sup>1</sup>H NMR (CDCl<sub>3</sub>, 400 MHz): δ 10.13 (s, 1H), 8.81–8.76 (c, 2H), 8.71 (d, *J* = 8.2 Hz, 1H), 8.45 (s, 1H), 8.03 (d, *J* = 7.8 Hz, 1H), 8.01–7.96 (m, 2H), 7.85–7.80 (m, 2H), 7.77–7.72 (c, 3H), 7.67–7.63 (m, 1H). <sup>13</sup>C NMR (CDCl<sub>3</sub>, 101 MHz): δ 165.4, 158.9, 134.8, 131.9, 131.0, 130.9, 130.8, 130.5, 130.1, 129.6, 128.6, 128.2, 127.7, 127.24, 127.17, 125.1, 124.0, 123.3, 122.8. IR (ATR): 3065 w, 1784 w, 1717 s, 1348 m, 1302 s, 1121 m. MS (EI, relative intensity, %) *m/z*: 350 (M<sup>+</sup>, 31), 204 (26), 203 (100), 189 (14), 104 (11). HRMS (DART) *m/z*: [M + H]<sup>+</sup> Calcd for C<sub>23</sub>H<sub>15</sub>N<sub>2</sub>O<sub>2</sub> 351.11280; Found 351.11304.

**(E)-2-[(3-Phenylpropylidene)amino]isoindoline-1,3-dione (1n) [CAS RN: 121597-23-7].**

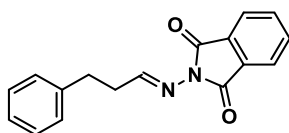

This compound was prepared on a 3 mmol scale. White solid (0.20 g, 24%).  $R_f = 0.31$  (hexane/EtOAc = 2/1).  $^1\text{H}$  NMR ( $\text{CDCl}_3$ , 400 MHz):  $\delta$  8.71 (t,  $J = 5.4$  Hz, 1H), 7.93–7.87 (m, 2H), 7.79–7.74 (m, 5H), 7.34–7.21 (c, 5H), 3.01–2.96 (m, 2H), 2.88–2.82 (m, 2H).  $^{13}\text{C}$  NMR ( $\text{CDCl}_3$ , 101 MHz):  $\delta$  165.2, 164.8, 140.5, 134.7, 130.3, 128.7, 128.6, 126.5, 123.9, 35.8, 32.5. IR (ATR): 3024 w, 2931 w, 1781 w, 1714 s, 1622 w, 1371 m, 1313 m, 1130 m. MS (EI, relative intensity, %)  $m/z$ : 278 ( $\text{M}^+$ , 3), 163 (23), 148 (10), 132 (36), 131 (18), 130 (100), 117 (79), 116 (76), 115 (20), 105 (29), 104 (74), 103 (10). HRMS (DART)  $m/z$ :  $[\text{M} + \text{H}]^+$  Calcd for  $\text{C}_{17}\text{H}_{15}\text{N}_2\text{O}_2$  279.11280; Found 279.11268.

**2-[(1E,2E)-3-Phenylallylidene]amino}isoindoline-1,3-dione (1o) [CAS RN: 32387-09-0].**

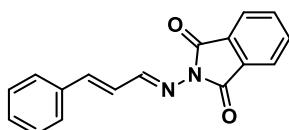

This compound was prepared on a 3 mmol scale. Pale yellow solid (622 mg, 75%).  $R_f = 0.29$  (hexane/EtOAc = 2/1).  $\text{Mp} = 191.2\text{--}191.9$  °C.  $^1\text{H}$  NMR ( $\text{CDCl}_3$ , 400 MHz):  $\delta$  9.33–9.24 (m, 1H), 7.94–7.90 (m, 2H), 7.81–7.76 (m, 2H), 7.54–7.51 (m, 2H), 7.41–7.36 (c, 3H), 7.19–7.10 (c, 2H).  $^{13}\text{C}$  NMR ( $\text{CDCl}_3$ , 101 MHz):  $\delta$  165.3, 159.7, 144.0, 135.6, 134.8, 130.4, 129.8, 129.1, 127.7, 125.8, 123.9. IR (ATR): 3030 w, 2985 w, 1717 s, 1624 w, 1341 w, 1299 s, 1110 m, 1079 m. MS (EI, relative intensity, %)  $m/z$ : 276 ( $\text{M}^+$ , 10), 275 (21), 199 (14), 130 (46), 129 (100), 115 (17), 105 (11), 104 (21), 76 (24). HRMS (DART)  $m/z$ :  $[\text{M} + \text{H}]^+$  Calcd for  $\text{C}_{17}\text{H}_{13}\text{N}_2\text{O}_2$  277.09715; Found 277.09727.

**(E)-2-[(3-Phenylprop-2-yn-1-ylidene)amino]isoindoline-1,3-dione (1p).**

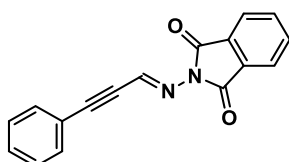

This compound was prepared on a 9.4 mmol scale. Pale yellow solid (818 mg, 32%).  $R_f = 0.34$  (hexane/ $\text{CHCl}_3 = 1/3$ ).  $\text{Mp} = 164.7\text{--}165.2$  °C.  $^1\text{H}$  NMR ( $\text{CDCl}_3$ , 400 MHz):  $\delta$  9.10 (s, 1H), 7.96–7.92 (m, 2H), 7.83–7.78 (m, 2H), 7.60–7.57 (m, 2H), 7.45–7.36 (c, 3H).  $^{13}\text{C}$  NMR ( $\text{CDCl}_3$ , 101 MHz):  $\delta$  164.9, 141.8, 135.1, 132.5, 130.2, 130.1, 128.7, 124.2, 121.4, 98.7, 84.7. IR (ATR): 3042 w, 2205 w, 1787 w, 1723 s, 1607 w, 1367 m, 1298 m, 1120 m. MS (EI, relative intensity, %)  $m/z$ : 274 ( $\text{M}^+$ , 21), 273 (47), 229 (11), 128 (19), 127 (100), 105 (62), 104 (37). HRMS (DART)  $m/z$ :  $[\text{M} + \text{H}]^+$  Calcd for  $\text{C}_{17}\text{H}_{11}\text{N}_2\text{O}_2$  275.08150; Found 275.08260.

**General Procedure for the Preparation of N-Phthaloyl Cyclobutanone Hydrazones 3**

A two necked flask equipped with a Dean-Stark trap and magnetic stirring bar was dried with a heat gun and purged with  $\text{N}_2$ . After allowing the flask to cool to room temperature, N-aminophthalimide (1 equiv), cyclobutanone (1 equiv),  $\text{CF}_3\text{CO}_2\text{H}$  (30 mol%), and toluene (0.1 M) were added. The resulting mixture was subsequently refluxed overnight.

After the mixture was cooled to room temperature, the precipitated *N*-phthaloyl cyclobutanone hydrazone **3** was collected by filtration. The crude product was purified by recrystallization from toluene.

### 2-[(3-Phenylcyclobutylidene)amino]isoindoline-1,3-dione (**3a**).

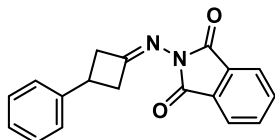

This compound was prepared on a 2.3 mmol scale. White solid (351 mg, 53%).  $R_f$  = 0.20 (hexane/EtOAc = 2/1). Mp = 137.8–138.1 °C.  $^1\text{H}$  NMR ( $\text{CDCl}_3$ , 400 MHz):  $\delta$  7.90–7.85 (m, 2H), 7.77–7.72 (m, 2H), 7.38–7.23 (c, 5H), 3.69–3.60 (m, 2H), 3.41–3.33 (m, 2H), 3.28–3.21 (m, 2H).  $^{13}\text{C}$  NMR ( $\text{CDCl}_3$ , 101 MHz):  $\delta$  177.9, 164.1, 143.3, 134.4, 131.0, 128.8, 126.9, 126.6, 123.8, 45.0, 43.2, 31.8. IR (ATR): 3029 w, 2926 w, 1785 w, 1717 s, 1683 w, 1371 m, 1352 m, 1319 m. MS (EI, relative intensity, %)  $m/z$ : 290 ( $\text{M}^+$ , 88), 289 (21), 186 (23), 144 (57), 143 (59), 130 (44), 129 (32), 128 (46), 116 (34), 115 (22), 104 (100). HRMS (DART)  $m/z$ :  $[\text{M} + \text{H}]^+$  Calcd for  $\text{C}_{18}\text{H}_{15}\text{N}_2\text{O}_2$  291.11280; Found 291.11370.

### 2-[[3-(*p*-Tolyl)cyclobutylidene]amino]isoindoline-1,3-dione (**3b**).

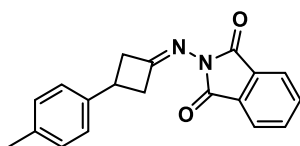

This compound was prepared on a 12 mmol scale. Colorless powder (1.35 g, 38%).  $R_f$  = 0.14 (hexane/EtOAc = 3/1). Mp = 160.1–160.4 °C.  $^1\text{H}$  NMR ( $\text{CDCl}_3$ , 400 MHz):  $\delta$  7.90–7.85 (m, 2H), 7.77–7.73 (m, 2H), 7.21 (d,  $J$  = 8.0 Hz, 2H), 7.17 (d,  $J$  = 8.2 Hz, 2H), 3.67–3.56 (m, 2H), 3.39–3.29 (m, 2H), 3.25–3.18 (m, 1H), 2.35 (s, 3H).  $^{13}\text{C}$  NMR ( $\text{CDCl}_3$ , 101 MHz):  $\delta$  178.2, 164.1, 140.2, 136.5, 134.4, 131.0, 129.4, 126.5, 123.7, 45.0, 43.3, 31.4, 21.1. IR (ATR): 3025 w, 2974 w, 1785 w, 1716 s, 1682 w, 1370 m, 1351 m, 1320 m. MS (EI, relative intensity, %)  $m/z$ : 305 (22), 304 ( $\text{M}^+$ , 100), 158 (63), 157 (64), 143 (44), 130 (60), 128 (58), 118 (60), 117 (76), 115 (41), 104 (70). HRMS (DART)  $m/z$ :  $[\text{M} + \text{H}]^+$  Calcd for  $\text{C}_{19}\text{H}_{17}\text{N}_2\text{O}_2$  305.12845; Found 305.12972.

### 2-[[3-(4-Methoxyphenyl)cyclobutylidene]amino]isoindoline-1,3-dione (**3c**).

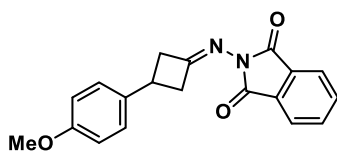

This compound was prepared on a 1 mmol scale. Colorless solid (101 mg, 31%).  $R_f$  = 0.34 (hexane/EtOAc = 2/1). Mp = 140.7–141.0 °C.  $^1\text{H}$  NMR ( $\text{CDCl}_3$ , 400 MHz):  $\delta$  7.90–7.85 (m, 2H), 7.77–7.72 (m, 2H), 7.25–7.22 (m, 2H), 6.91–6.87 (m, 2H), 3.81 (s, 3H), 3.66–3.54 (m, 2H), 3.38–3.27 (m, 2H), 3.24–3.15 (m, 1H).  $^{13}\text{C}$  NMR ( $\text{CDCl}_3$ , 101 MHz):  $\delta$  178.2, 164.1, 158.5, 135.4, 134.4, 131.0, 127.6, 123.7, 114.1, 55.4, 45.2, 43.4, 31.1. IR (ATR): 3035 w, 2963



w, 1714 s, 1681 m, 1513 m, 1370 m, 1253 s, 1117 m. MS (EI, relative intensity, %)  $m/z$ : 321 (21), 320 ( $M^+$ , 74), 319 (32), 213 (12), 174 (100), 173 (86), 159 (69), 144 (35), 134 (82), 119 (52), 104 (48). HRMS (DART)  $m/z$ :  $[M + H]^+$  Calcd for  $C_{19}H_{17}N_2O_3$  321.12337; Found 321.12397.

**2-([3-(4-fluorophenyl)cyclobutylidene]amino)isoindoline-1,3-dione (3d).**

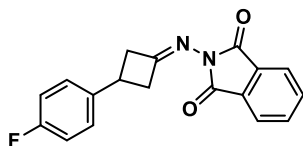

This compound was prepared on a 2 mmol scale. Colorless powder (213 mg, 35%).  $R_f$  = 0.25 (hexane/EtOAc = 2/1).  $M_p$  = 149.3–149.7 °C.  $^1H$  NMR ( $CDCl_3$ , 400 MHz):  $\delta$  7.90–7.85 (m, 2H), 7.77–7.73 (m, 2H), 7.29–7.25 (m, 2H), 7.07–7.01 (m, 2H), 3.69–3.58 (m, 2H), 3.42–3.27 (m, 2H), 3.25–3.17 (m, 1H).  $^{13}C$  NMR ( $CDCl_3$ , 101 MHz):  $\delta$  177.4, 164.1, 161.8 (d,  $J$  = 245.7 Hz), 139.0, 134.5, 131.0, 128.1 (d,  $J$  = 8.7 Hz), 123.8, 115.6 (d,  $J$  = 21.2 Hz), 45.2, 43.3, 31.1.  $^{19}F$  NMR (376 MHz,  $CDCl_3$ ):  $\delta$  -115.9 (tt,  $J$  = 8.7, 5.8 Hz). IR (ATR): 3064 w, 2927 w, 1750 m, 1717 s, 1683 m, 1510 m. MS (EI, relative intensity, %)  $m/z$ : 309 (18), 308 ( $M^+$ , 85), 292 (29), 162 (39), 161 (49), 147 (26), 130 (41), 122 (33), 104 (100). HRMS (DART)  $m/z$ :  $[M + H]^+$  Calcd for  $C_{18}H_{14}N_2O_2F$  309.10338; Found 309.10327.

**2-([3-[4-(trifluoromethyl)phenyl]cyclobutylidene]amino)isoindoline-1,3-dione (3e).**

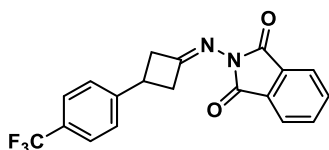

This compound was prepared on a 2 mmol scale. Pale yellow solid (352 mg, 49%).  $R_f$  = 0.34 (hexane/EtOAc = 2/1).  $M_p$  = 99.2–99.6 °C.  $^1H$  NMR ( $CDCl_3$ , 400 MHz):  $\delta$  7.91–7.85 (m, 2H), 7.77–7.72 (m, 2H), 7.62 (d,  $J$  = 8.0 Hz, 2H), 7.44 (d,  $J$  = 8.5 Hz, 2H), 3.75–3.65 (m, 2H), 3.47–3.32 (m, 2H), 3.30–3.22 (m, 1H).  $^{13}C$  NMR ( $CDCl_3$ , 101 MHz):  $\delta$  176.6, 164.1, 147.3, 134.5, 131.0, 129.3 (q,  $J$  = 32.4 Hz), 127.0, 125.8 (q,  $J$  = 3.9 Hz), 124.2 (q,  $J$  = 272.0 Hz), 123.8, 44.9, 43.1, 31.6.  $^{19}F$  NMR (376 MHz,  $CDCl_3$ ):  $\delta$  -62.9. IR (ATR): 3071 w, 2976 w, 1725 s, 1685 m, 1321 s, 1158 m, 1111 m. MS (EI, relative intensity, %)  $m/z$ : 359 (20), 358 ( $M^+$ , 86), 212 (45), 211 (52), 186 (65), 130 (56), 128 (36), 104 (100). HRMS (DART)  $m/z$ :  $[M + H]^+$  Calcd for  $C_{19}H_{14}N_2O_2F_3$  359.10019; Found 359.10030.

**2-([3-(naphthalen-2-yl)cyclobutylidene]amino)isoindoline-1,3-dione (3f).**

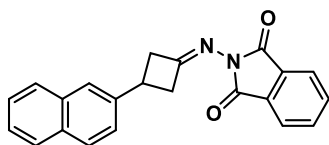

This compound was prepared on a 1.5 mmol scale. Colorless powder (230 mg, 45%).  $R_f$  = 0.21 (hexane/EtOAc = 2/1).  $M_p$  = 149.1–149.6 °C.  $^1H$  NMR ( $CDCl_3$ , 400 MHz):  $\delta$  7.92–7.81 (c, 5H), 7.78–7.73 (c, 3H), 7.52–7.44 (c, 3H), 3.86–3.68 (c, 2H), 3.52–3.31 (c, 3H).  $^{13}C$  NMR ( $CDCl_3$ , 101 MHz):  $\delta$  177.8, 164.2, 140.6, 134.4, 133.5, 132.5, 131.1,

128.7, 127.8, 126.5, 125.0, 124.9, 123.8, 44.9, 43.1, 32.0 (three signals are obscured by overlap with other signals). IR (ATR): 3048 w, 1759 w, 1714 s, 1687 m, 1373 m, 1748 m, 1322 m, 1117 m. MS (EI, relative intensity, %)  $m/z$ : 340 ( $M^+$ , 11), 293 (19), 292 (100), 248 (25), 194 (10), 193 (13), 164 (10), 104 (78). HRMS (DART)  $m/z$ :  $[M + H]^+$  Calcd for  $C_{22}H_{17}N_2O_2$  341.12845; Found 341.12822.

**Methyl 3-{3-[(1,3-Dioxisoindolin-2-yl)imino]cyclobutyl}-3-methylbutanoate (3g).**

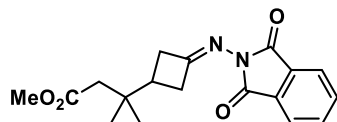

This compound was prepared on a 1.1 mmol scale. White solid (173 mg, 48%).  $R_f$  = 0.20 (hexane/EtOAc = 2/1). Mp = 61.6–62.4 °C.  $^1H$  NMR ( $CDCl_3$ , 400 MHz):  $\delta$  7.87–7.85 (m, 2H), 7.75–7.73 (m, 2H), 3.66 (s, 3H), 3.13–2.97 (c, 2H), 2.91–2.78 (c, 2H), 2.47 (quint,  $J$  = 8.3 Hz, 1H), 2.22 (s, 2H), 1.06 (s, 3H), 1.04 (s, 3H).  $^{13}C$  NMR ( $CDCl_3$ , 101 MHz):  $\delta$  178.1, 172.2, 164.1, 134.4, 131.0, 123.7, 51.6, 44.7, 38.4, 36.8, 36.3, 34.5, 23.40, 23.37. IR (ATR): 2959 w, 1783 w, 1716 s, 1684 m, 1467 w, 1352 m, 1319 m, 1114 m. MS (EI, relative intensity, %)  $m/z$ : 328 ( $M^+$ , 3), 255 (16), 214 (15), 213 (100), 186 (28), 130 (28), 122 (10), 108 (22), 107 (18), 104 (26), 103 (11). HRMS (DART)  $m/z$ :  $[M + H]^+$  Calcd for  $C_{18}H_{21}N_2O_4$  329.14958; Found 329.15127.

### 3. General Procedure for the Pd-Catalyzed Transformation of *N*-Phthaloyl Hydrazones into Nitriles

#### General Procedure for the Pd-Catalyzed Transformation of 1 into 2

A 25 mL of J. Young Schlenk flask was dried with a heat gun and purged with  $N_2$ . After allowing the flask to cool to room temperature, *t*-BuOK (3.4 mg, 0.03 mmol, 10 mol%), IMes·HCl (5.1 mg, 0.015 mmol, 5 mol%), (IMes)Pd(allyl)Cl (7.3 mg, 0.015 mmol, 5 mol%), and toluene (0.75 mL) were added. After the resulting mixture was then stirred at room temperature for 5 min, **1** (0.3 mmol) and toluene (0.75 mL) were successively added, and the Schlenk flask was sealed with a J. Young cap. After stirring the reaction mixture at 120 °C for 24 h, the resulting mixture was filtered through a pad of Celite and further eluted with EtOAc. The crude mixture was purified by flash column chromatography over silica gel.

#### General Procedure for the Pd-Catalyzed Transformation of 3 into 4

A 25 mL of J. Young Schlenk flask was dried with a heat gun and purged with  $N_2$ . After allowing the flask to cool to room temperature, *t*-BuOK (3.4 mg, 0.03 mmol, 10 mol%), IPr·HCl (6.4 mg, 0.015 mmol, 5 mol%), (IPr)Pd(allyl)Cl (8.6 mg, 0.015 mmol, 5 mol%), and toluene (0.75 mL) were added. After the resulting mixture was then stirred at room temperature for 5 min, **3** (0.3 mmol) and toluene (0.75 mL) were successively added, and the Schlenk flask was sealed with a J. Young cap. After stirring the reaction mixture at 150 °C for 24 h, the resulting mixture was filtered through a pad of Celite and further eluted with EtOAc. The crude mixture was purified by flash column chromatography over silica gel unless otherwise noted.

## 4. Optimization Studies

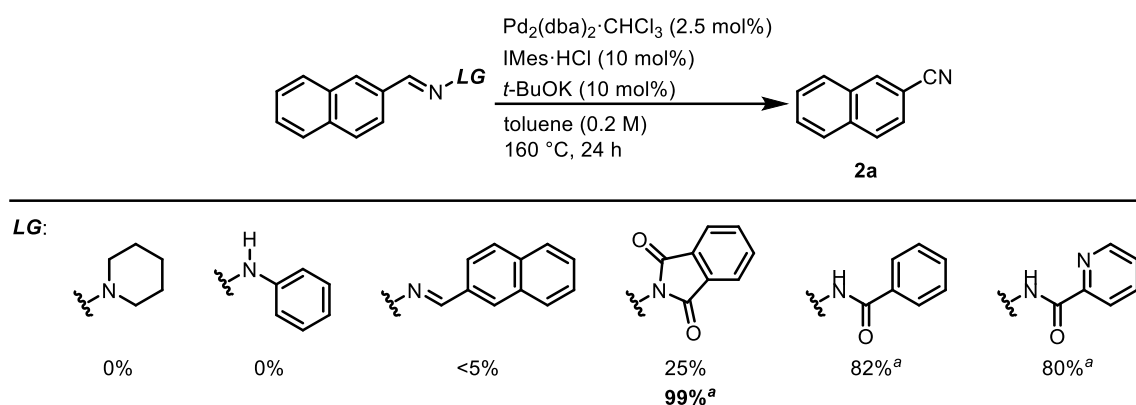

<sup>a</sup>(IMes)Pd(allyl)Cl (5 mol%), IMes·HCl (5 mol%), *t*-BuOK (10 mol%) was used at 120 °C.

**Scheme S1** Screening of Leaving Groups for the Pd-Catalyzed Synthesis of Nitriles from *N*-Substituted Hydrazones. Yields were determined by <sup>1</sup>H NMR analysis using 1,1,2,2-tetrachloroethene as the internal standard.

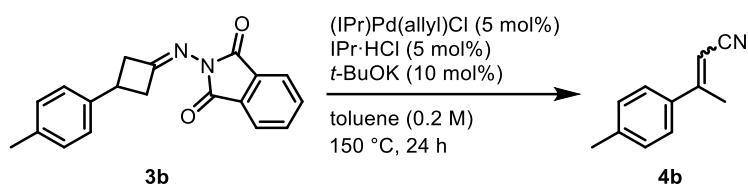

| entry | deviation of reaction conditions                                                                                    | yield of <b>4b</b> [%] | <i>E/Z</i> ratio of <b>4b</b> |
|-------|---------------------------------------------------------------------------------------------------------------------|------------------------|-------------------------------|
| 1     | none                                                                                                                | 85                     | 6.1:1                         |
| 2     | (IPr)Pd(allyl)Cl (5 mol%) and <i>t</i> -BuOK (5 mol%)                                                               | 74                     | 6.4:1                         |
| 3     | (IMes)Pd(allyl)Cl (5 mol%), IMes·HCl (5 mol%), and <i>t</i> -BuOK (10 mol%)                                         | 59                     | 8.4:1                         |
| 4     | Pd <sub>2</sub> (dba) <sub>3</sub> ·CHCl <sub>3</sub> (2.5 mol%) and IPr (10 mol%) in the absence of <i>t</i> -BuOK | 22                     | 4.5:1                         |
| 5     | K <sub>2</sub> CO <sub>3</sub> instead of <i>t</i> -BuOK                                                            | 81                     | 6.4:1                         |
| 6     | 1,4-dioxane instead of toluene                                                                                      | 83                     | 6.5:1                         |
| 7     | at 160 °C                                                                                                           | 84                     | 6.6:1                         |
| 8     | at 140 °C                                                                                                           | 82                     | 5.8:1                         |
| 9     | IPr (10 mol%) in the absence of Pd catalyst and base                                                                | 0                      | —                             |
| 10    | <i>t</i> -BuOK (10 mol%) in the absence of Pd catalyst and NHC                                                      | 0                      | —                             |

**Table S1** Screening of Reaction Conditions for the Pd-Catalyzed Synthesis of Nitriles from *N*-Substituted Cyclobutanone Hydrazones. Yields were determined by <sup>1</sup>H NMR analysis using 1,1,2,2-tetrachloroethene as the internal standard.

## 5. Characterization of Products

### 2-Naphthonitrile (2a) [CAS RN: 613-46-7].

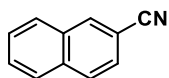

Colorless powder (44.7 mg, 97%).  $R_f = 0.46$  (hexane/EtOAc = 4/1). Mp = 67.0–67.3 °C (lit.<sup>1</sup> mp = 68–70 °C). <sup>1</sup>H NMR (CDCl<sub>3</sub>, 400 MHz):  $\delta$  8.24 (s, 1H), 7.94–7.88 (c, 3H), 7.68–7.59 (c, 3H). <sup>13</sup>C NMR (CDCl<sub>3</sub>, 101 MHz):  $\delta$  134.8, 134.3, 132.4, 129.3, 129.2, 128.5, 128.2, 127.8, 126.5, 119.4, 109.5. MS (EI, relative intensity, %)  $m/z$ : 154 (12), 153 (M<sup>+</sup>, 100), 126 (28). HRMS (DART)  $m/z$ : [M + H]<sup>+</sup> Calcd for C<sub>11</sub>H<sub>8</sub>N 154.06513; Found 154.06637.

### 4-Methylbenzonitrile (2b) [CAS RN: 104-85-8].

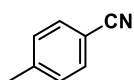

Colorless oil (30.2 mg, 86%, isolated by bulb-to-bulb distillation).  $R_f = 0.64$  (hexane/EtOAc = 2/1). Bp = 90–91 °C (11 mmHg). Mp = 30.6–30.8 °C (lit.<sup>1</sup> mp = 26–28 °C). <sup>1</sup>H NMR (CDCl<sub>3</sub>, 400 MHz):  $\delta$  7.54 (dt,  $J = 8.2, 1.7$  Hz, 2H), 7.28–7.25 (c, 2H). <sup>13</sup>C NMR (CDCl<sub>3</sub>, 101 MHz):  $\delta$  143.8, 132.2, 130.0, 119.3, 109.4, 22.0. MS (EI, relative intensity, %)  $m/z$ : 117 (M<sup>+</sup>, 100), 116 (64), 90 (47), 89 (26). HRMS (DART)  $m/z$ : [M + H]<sup>+</sup> Calcd for C<sub>8</sub>H<sub>8</sub>N 118.06513; Found 118.06457.

### 4-Methoxybenzonitrile (2c) [CAS RN: 874-90-8].

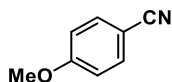

White solid (29.0 mg, 73%).  $R_f = 0.42$  (hexane/EtOAc = 3/1). Mp = 58.9–59.2 °C (lit.<sup>1</sup> mp = 68–70 °C). <sup>1</sup>H NMR (CDCl<sub>3</sub>, 400 MHz):  $\delta$  7.60 (dt,  $J = 9.0, 2.4$  Hz, 2H), 6.96 (dt,  $J = 9.4, 2.4$  Hz, 2H), 3.87 (s, 3H). <sup>13</sup>C NMR (CDCl<sub>3</sub>, 101 MHz):  $\delta$  162.9, 134.1, 119.4, 114.8, 104.0, 55.7. MS (EI, relative intensity, %)  $m/z$ : 133 (M<sup>+</sup>, 100), 118 (11), 104 (15), 103 (52), 90 (44), 76 (11). HRMS (DART)  $m/z$ : [M + H]<sup>+</sup> Calcd for C<sub>8</sub>H<sub>8</sub>NO 134.06004; Found 134.06000.

### 4-(Trifluoromethyl)benzonitrile (2d) [CAS RN: 455-18-5].

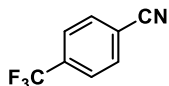

Colorless crystal (41.3 mg, 81%, isolated by bulb-to-bulb distillation).  $R_f = 0.70$  (hexane/EtOAc = 2/1). Bp = 64–65 °C (23 mmHg). Mp = 37.7–38.4 °C (lit.<sup>2</sup> mp = 35 °C). <sup>1</sup>H NMR (CDCl<sub>3</sub>, 400 MHz):  $\delta$  7.81 (d,  $J = 8.2$  Hz, 1H), 7.76 (d,  $J = 8.2$  Hz, 1H). <sup>13</sup>C NMR (CDCl<sub>3</sub>, 101 MHz):  $\delta$  134.7 (q,  $J = 33.4$  Hz), 132.8, 126.3 (q,  $J = 3.5$  Hz), 123.2 (q,  $J = 272.9$  Hz), 117.6, 116.2. <sup>19</sup>F NMR (376 MHz, CDCl<sub>3</sub>):  $\delta$  -64.0. MS (EI, relative intensity, %)  $m/z$ : 171 (M<sup>+</sup>, 100), 170 (27), 152 (39), 121 (70). HRMS (DART)  $m/z$ : [M + H]<sup>+</sup> Calcd for C<sub>10</sub>H<sub>7</sub>F<sub>3</sub>N 172.03686; Found 172.03719.

### Methyl 4-Cyanobenzoate (2e) [CAS RN: 1129-35-7].

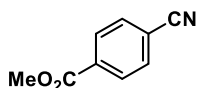

White solid (44.2 mg, 92%).  $R_f = 0.46$  (hexane/EtOAc = 3/1). Mp = 67.9–68.2 °C (lit.<sup>2</sup> mp = 68–69 °C).  $^1\text{H NMR}$  ( $\text{CDCl}_3$ , 400 MHz):  $\delta$  8.15 (ddd,  $J = 8.2, 2.0, 1.4$  Hz, 2H), 7.75 (ddd,  $J = 8.2, 2.0, 1.4$  Hz, 2H), 3.97 (s, 3H).  $^{13}\text{C NMR}$  ( $\text{CDCl}_3$ , 101 MHz):  $\delta$  165.6, 134.1, 132.4, 130.2, 118.1, 116.5, 52.9. IR (ATR): 3003 w, 2956 w, 2851 w, 2231 w, 1712 s, 1437 m, 1361 m, 1278 s, 1108 m. MS (EI, relative intensity, %)  $m/z$ : 161 ( $\text{M}^+$ , 21), 160 (11), 130 (100), 102 (44). HRMS (DART)  $m/z$ :  $[\text{M} + \text{H}]^+$  Calcd for  $\text{C}_9\text{H}_8\text{NO}_2$  162.05495; Found 162.05543.

### 3-Methoxybenzonitrile (2f) [CAS RN: 1527-89-5].

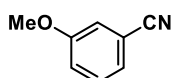

Pale yellow oil (31.7 mg, 79%).  $R_f = 0.51$  (hexane/EtOAc = 3/1).  $^1\text{H NMR}$  ( $\text{CDCl}_3$ , 400 MHz):  $\delta$  7.40–7.35 (m, 1H), 7.25 (dt,  $J = 7.6, 1.3$  Hz, 1H), 7.15–7.12 (c, 2H), 3.84 (s, 3H).  $^{13}\text{C NMR}$  ( $\text{CDCl}_3$ , 101 MHz):  $\delta$  159.8, 130.5, 124.7, 119.5, 118.9, 117.0, 113.4, 55.7. MS (EI, relative intensity, %)  $m/z$ : 133 ( $\text{M}^+$ , 100), 104 (18), 103 (84), 102 (11), 90 (34), 76 (15). HRMS (DART)  $m/z$ :  $[\text{M} + \text{H}]^+$  Calcd for  $\text{C}_8\text{H}_8\text{NO}$  134.06004; Found 134.06041.

### 3-Fluoro-4-methylbenzonitrile (2g) [CAS RN: 170572-49-3].

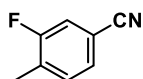

White solid (30.7 mg, 76%, isolated by bulb-to-bulb distillation).  $R_f = 0.67$  (hexane/EtOAc = 3/1). Bp = 75–76 °C (0.5 mmHg). Mp = 51.5–52.0 °C.  $^1\text{H NMR}$  ( $\text{CDCl}_3$ , 400 MHz):  $\delta$  7.36 (dd,  $J = 7.8, 1.6$  Hz, 1H), 7.32–7.28 (c, 2H), 2.35 (d,  $J = 2.0$  Hz, 3H).  $^{13}\text{C NMR}$  ( $\text{CDCl}_3$ , 101 MHz):  $\delta$  160.8 (d,  $J = 248.5$  Hz), 132.6 (d,  $J = 4.8$  Hz), 131.5 (d,  $J = 17.3$  Hz), 128.1 (d,  $J = 3.9$  Hz), 118.7 (d,  $J = 25.1$  Hz), 118.0 (d,  $J = 2.9$  Hz), 111.0 (d,  $J = 9.6$  Hz), 15.1 (d,  $J = 2.9$  Hz).  $^{19}\text{F NMR}$  (376 MHz,  $\text{CDCl}_3$ ):  $\delta$  -115.1. MS (EI, relative intensity, %)  $m/z$ : 135 ( $\text{M}^+$ , 100), 134 (86), 115 (12), 108 (57), 107 (38). HRMS (DART)  $m/z$ :  $[\text{M} + \text{H}]^+$  Calcd for  $\text{C}_8\text{H}_7\text{NF}$  136.05570; Found 136.05557.

### 2-Fluoro-5-methylbenzonitrile (2h) [CAS RN: 64113-84-4].

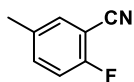

White solid (36.6 mg, 90%, isolated by bulb-to-bulb distillation).  $R_f = 0.68$  (hexane/EtOAc = 3/1). Bp = 65–66 °C (1.5 mmHg). Mp = 49.9–50.2 °C.  $^1\text{H NMR}$  ( $\text{CDCl}_3$ , 400 MHz):  $\delta$  7.42–7.37 (c, 2H), 7.13–7.07 (m, 1H), 2.37 (d,  $J = 0.7$  Hz, 3H).  $^{13}\text{C NMR}$  ( $\text{CDCl}_3$ , 101 MHz):  $\delta$  161.5 (d,  $J = 256.2$  Hz), 135.8 (d,  $J = 8.7$  Hz), 134.9 (d,  $J = 3.9$  Hz), 133.5, 116.2 (d,  $J = 19.3$  Hz), 114.3, 101.1 (d,  $J = 15.4$  Hz), 20.5.  $^{19}\text{F NMR}$  (376 MHz,  $\text{CDCl}_3$ ):  $\delta$  -112.9. MS (EI, relative intensity, %)  $m/z$ : 135 ( $\text{M}^+$ , 100), 134 (97), 115 (19), 108 (44), 107 (39). HRMS (DART)  $m/z$ :  $[\text{M} + \text{H}]^+$  Calcd for  $\text{C}_8\text{H}_7\text{NF}$  136.05570; Found 136.05565.

### Nicotinonitrile (2i) [CAS RN: 100-54-9].

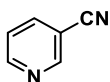

Colorless oil (25.6 mg, 82%).  $R_f = 0.06$  (hexane/EtOAc = 2/1).  $^1\text{H NMR}$  ( $\text{CDCl}_3$ , 400 MHz):  $\delta$  8.91 (d,  $J = 1.4$  Hz, 1H), 8.84 (dd,  $J = 4.9, 1.7$  Hz, 1H), 7.99 (dt,  $J = 7.9, 1.9$  Hz, 1H), 7.46 (ddd,  $J = 7.9, 5.0, 0.8$  Hz, 1H).  $^{13}\text{C NMR}$  ( $\text{CDCl}_3$ , 101 MHz):  $\delta$  153.1, 152.5, 139.4, 123.7, 116.6, 110.2. MS (EI, relative intensity, %)  $m/z$ : 104 ( $\text{M}^+$ , 100), 77 (63), 76 (19). HRMS (DART)  $m/z$ :  $[\text{M} + \text{H}]^+$  Calcd for  $\text{C}_6\text{H}_5\text{N}_2$  105.04472; Found 105.04357.

**1H-Indole-2-carbonitrile (2j) [CAS RN: 36193-65-3].**

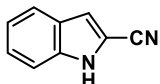

The reaction was performed in toluene (3 mL). Colorless solid (46.1 mg, 98%).  $R_f = 0.49$  (hexane/EtOAc = 2/1) Mp = 101.8–102.0 °C (lit.<sup>3</sup> mp = 100–101 °C).  $^1\text{H NMR}$  ( $\text{CDCl}_3$ , 400 MHz):  $\delta$  8.59 (brs, 1H), 7.68 (ddd,  $J = 8.1, 1.7, 0.9$  Hz, 1H), 7.45–7.37 (c, 2H), 7.25–7.20 (c, 2H).  $^{13}\text{C NMR}$  ( $\text{CDCl}_3$ , 101 MHz):  $\delta$  137.0, 126.4, 126.3, 122.2, 121.8, 114.6, 114.5, 111.9, 106.2. MS (EI, relative intensity, %)  $m/z$ : 143 (11), 142 ( $\text{M}^+$ , 100), 115 (42), 114 (15). HRMS (DART)  $m/z$ :  $[\text{M} + \text{H}]^+$  Calcd for  $\text{C}_9\text{H}_7\text{N}_2$  143.06037; Found 143.06011.

**Benzofuran-2-carbonitrile (2k) [CAS RN: 41717-32-2].**

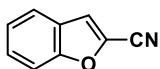

Pale yellow solid (37.2 mg, 87%).  $R_f = 0.54$  (hexane/EtOAc = 3/1). Mp = 34.1–34.6 °C.  $^1\text{H NMR}$  ( $\text{CDCl}_3$ , 400 MHz):  $\delta$  7.69 (dt,  $J = 7.8, 1.0$  Hz, 1H), 7.58–7.49 (c, 2H), 7.47 (d,  $J = 0.9$  Hz, 1H), 7.37 (ddd,  $J = 8.0, 6.9, 1.1$  Hz, 1H).  $^{13}\text{C NMR}$  ( $\text{CDCl}_3$ , 101 MHz):  $\delta$  155.8, 128.6, 127.4, 125.6, 124.7, 122.7, 118.6, 112.2, 112.0. MS (EI, relative intensity, %)  $m/z$ : 144 ( $\text{M}^+$ , 10), 143 (100), 115 (52), 114 (19), 88 (15). HRMS (DART)  $m/z$ :  $[\text{M} + \text{H}]^+$  Calcd for  $\text{C}_9\text{H}_6\text{NO}$  144.04439; Found 144.04448.

**Benzo[b]thiophene-2-carbonitrile (2l) [CAS RN: 55219-11-9].**

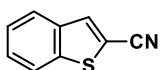

White solid (44.9 mg, 94%).  $R_f = 0.61$  (hexane/EtOAc = 3/1). Mp = 27.2–27.9 °C (lit.<sup>1</sup> mp = 24–28 °C).  $^1\text{H NMR}$  ( $\text{CDCl}_3$ , 400 MHz):  $\delta$  7.92–7.86 (c, 3H), 7.57–7.46 (c, 2H).  $^{13}\text{C NMR}$  ( $\text{CDCl}_3$ , 101 MHz):  $\delta$  141.4, 137.5, 135.1, 128.0, 125.8, 125.4, 122.5, 114.6, 109.7. MS (EI, relative intensity, %)  $m/z$ : 159 ( $\text{M}^+$ , 100), 115 (10). HRMS (DART)  $m/z$ :  $[\text{M} + \text{H}]^+$  Calcd for  $\text{C}_9\text{H}_6\text{NS}$  160.02155; Found 160.02205.

**Phenanthrene-9-carbonitrile (2m) [CAS RN: 2510-55-6].**

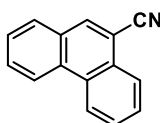

Colorless solid (57.5 mg, 94%).  $R_f = 0.66$  (hexane/EtOAc = 2/1).  $M_p = 111.0\text{--}111.5\text{ }^\circ\text{C}$  (lit.<sup>4</sup>  $m_p = 108\text{--}109\text{ }^\circ\text{C}$ ).  $^1\text{H NMR}$  ( $\text{CDCl}_3$ , 400 MHz):  $\delta$  8.72–8.65 (c, 2H), 8.32–8.27 (m, 1H), 8.24 (s, 1H), 7.92 (d,  $J = 8.0$  Hz, 1H), 7.83–7.72 (c, 3H), 7.68 (td,  $J = 7.5, 1.0$  Hz, 1H).  $^{13}\text{C NMR}$  ( $\text{CDCl}_3$ , 101 MHz):  $\delta$  135.8, 131.9, 130.1, 130.0, 129.9, 129.6, 129.0, 128.3, 128.2, 127.7, 126.2, 123.2, 123.0, 118.1, 110.0. MS (EI, relative intensity, %)  $m/z$ : 204 (17), 203 ( $M^+$ , 100), 202 (11), 201 (10). HRMS (DART)  $m/z$ :  $[M + H]^+$  Calcd for  $\text{C}_{15}\text{H}_{10}\text{N}$  204.08078; Found 204.08069.

**3-Phenylpropanenitrile (2n) [CAS RN: 645-59-0].**

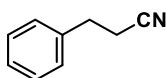

Pale yellow oil (35.5 mg, 86%).  $R_f = 0.43$  (hexane/EtOAc = 3/1).  $^1\text{H NMR}$  ( $\text{CDCl}_3$ , 400 MHz):  $\delta$  7.36–7.31 (m, 2H), 7.30–7.21 (m, 2H), 2.96 (t,  $J = 7.4$  Hz, 2H), 2.62 (t,  $J = 7.4$  Hz, 2H).  $^{13}\text{C NMR}$  ( $\text{CDCl}_3$ , 101 MHz):  $\delta$  138.2, 129.0, 128.4, 127.4, 119.3, 31.7, 19.5. MS (EI, relative intensity, %)  $m/z$ : 131 ( $M^+$ , 29), 91 (100). HRMS (DART)  $m/z$ :  $[M + H]^+$  Calcd for  $\text{C}_9\text{H}_{10}\text{N}$  132.08078; Found 132.08086.

**(E)-3-Phenylbut-2-enenitrile ((E)-4a) [CAS RN: 14368-40-2].**

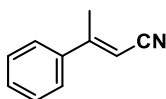

Colorless oil (31.9 mg, 74%, isolated by preparative HPLC).  $R_f = 0.67$  (hexane/EtOAc = 2/1).  $^1\text{H NMR}$  ( $\text{CDCl}_3$ , 400 MHz):  $\delta$  7.49–7.44 (m, 2H), 7.43–7.38 (c, 3H), 5.63 (dd,  $J = 2.0, 0.9$  Hz, 1H), 2.48 (d,  $J = 1.2$  Hz, 3H).  $^{13}\text{C NMR}$  ( $\text{CDCl}_3$ , 101 MHz):  $\delta$  159.9, 138.3, 130.4, 129.0, 126.0, 117.8, 95.6, 20.4. MS (EI, relative intensity, %)  $m/z$ : 144 (12), 143 ( $M^+$ , 100), 142 (14), 128 (12), 117 (10), 116 (52), 115 (50), 103 (19), 78 (27). HRMS (DART)  $m/z$ :  $[M + H]^+$  Calcd for  $\text{C}_{10}\text{H}_{10}\text{N}$  144.08078; Found 144.08053.

**(Z)-3-Phenylbut-2-enenitrile ((Z)-4a) [CAS RN: 14799-79-2].**

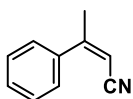

Colorless oil (5.0 mg, 12%, isolated by preparative HPLC).  $R_f = 0.60$  (hexane/EtOAc = 2/1).  $^1\text{H NMR}$  ( $\text{CDCl}_3$ , 400 MHz):  $\delta$  7.57–7.52 (m, 2H), 7.46–7.40 (c, 3H), 5.41 (dd,  $J = 2.9, 1.4$  Hz, 1H), 2.29 (d,  $J = 1.5$  Hz, 3H).  $^{13}\text{C NMR}$  ( $\text{CDCl}_3$ , 101 MHz):  $\delta$  161.2, 138.0, 130.0, 128.8, 127.2, 117.8, 95.6, 24.8. MS (EI, relative intensity, %)  $m/z$ : 144 (11), 143 ( $M^+$ , 100), 142 (14), 128 (12), 116 (52), 115 (50), 103 (17), 78 (23), 77 (14). HRMS (DART)  $m/z$ :  $[M + H]^+$  Calcd for  $\text{C}_{10}\text{H}_{10}\text{N}$  144.08078; Found 144.08141.

**(E)-3-(4-tolyl)but-2-enenitrile ((E)-4b) [CAS RN: 130240-32-3].**

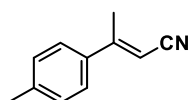

Colorless solid (32.0 mg, 68%, isolated by preparative HPLC).  $R_f = 0.63$  (hexane/EtOAc = 3/1).  $M_p = 40.5\text{--}41.0\text{ }^\circ\text{C}$ .  $^1\text{H NMR}$  ( $\text{CDCl}_3$ , 400 MHz):  $\delta$  7.37 (dt,  $J = 8.4, 1.9$  Hz, 2H), 7.21 (dd,  $J = 8.6, 0.6$  Hz, 2H), 5.60 (d,  $J = 0.9$  Hz, 1H), 2.45 (d,  $J = 0.9$  Hz, 3H), 2.38 (s, 3H).  $^{13}\text{C NMR}$  ( $\text{CDCl}_3$ , 101 MHz):  $\delta$  159.6, 140.8, 135.4, 129.6, 125.9, 118.0, 94.6, 21.4, 20.2. MS (EI, relative intensity, %)  $m/z$ : 158 (12), 157 ( $M^+$ , 100), 156 (56), 142 (31), 130 (14), 129 (28), 128 (11), 116 (10), 115 (38), 91 (19). HRMS (DART)  $m/z$ :  $[M + H]^+$  Calcd for  $\text{C}_{11}\text{H}_{12}\text{N}$  158.09643; Found 158.09701.

**(Z)-3-(4-tolyl)but-2-enenitrile ((Z)-4b) [CAS RN: 1613466-43-5].**

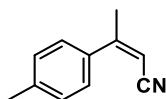

Colorless oil (7.3 mg, 15%, isolated by preparative HPLC).  $R_f = 0.57$  (hexane/EtOAc = 3/1).  $^1\text{H NMR}$  ( $\text{CDCl}_3$ , 400 MHz):  $\delta$  7.46 (dt,  $J = 8.4, 1.9$  Hz, 2H), 7.23 (dd,  $J = 8.5, 0.7$  Hz, 2H), 5.35 (dd,  $J = 3.0, 1.4$  Hz, 1H), 2.38 (s, 3H), 2.27 (d,  $J = 1.6$  Hz, 3H).  $^{13}\text{C NMR}$  ( $\text{CDCl}_3$ , 101 MHz):  $\delta$  160.9, 140.3, 135.1, 129.4, 127.2, 118.0, 94.8, 24.7, 21.5. MS (EI, relative intensity, %)  $m/z$ : 158 (12), 157 ( $M^+$ , 100), 156 (56), 142 (32), 130 (15), 129 (32), 128 (13), 115 (44), 91 (22). HRMS (DART)  $m/z$ :  $[M + H]^+$  Calcd for  $\text{C}_{11}\text{H}_{12}\text{N}$  158.09643; Found 158.09725.

**(E)-3-(4-Methoxyphenyl)but-2-enenitrile ((E)-4c) [CAS RN: 120695-60-5].**

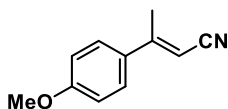

Colorless solid (34.6 mg, 67%, isolated by preparative HPLC).  $R_f = 0.42$  (hexane/EtOAc = 3/1).  $M_p = 63.1\text{--}63.8\text{ }^\circ\text{C}$ .  $^1\text{H NMR}$  ( $\text{CDCl}_3$ , 400 MHz):  $\delta$  7.46–7.42 (m, 2H), 6.93–6.90 (m, 2H), 5.55 (d,  $J = 0.9$  Hz, 1H), 3.84 (s, 3H), 2.44 (d,  $J = 0.9$  Hz, 2H).  $^{13}\text{C NMR}$  ( $\text{CDCl}_3$ , 101 MHz):  $\delta$  161.4, 158.9, 130.5, 127.5, 118.3, 114.2, 93.3, 55.6, 20.2. MS (EI, relative intensity, %)  $m/z$ : 174 (12), 173 ( $M^+$ , 100), 172 (15), 158 (33), 143 (16), 130 (20), 103 (36), 77 (19). HRMS (DART)  $m/z$ :  $[M + H]^+$  Calcd for  $\text{C}_{11}\text{H}_{12}\text{NO}$  174.09134; Found 174.09135.

**(Z)-3-(4-Methoxyphenyl)but-2-enenitrile ((Z)-4c) [CAS RN: 120695-61-6].**

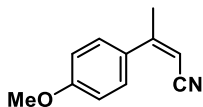

Colorless oil (5.8 mg, 11%, isolated by preparative HPLC).  $R_f = 0.40$  (hexane/EtOAc = 3/1).  $^1\text{H NMR}$  ( $\text{CDCl}_3$ , 400 MHz):  $\delta$  7.59–7.54 (m, 2H), 6.96–6.92 (m, 2H), 5.30 (dd,  $J = 2.8, 1.5$  Hz, 1H), 3.84 (s, 3H), 2.26 (d,  $J = 1.6$  Hz, 3H).  $^{13}\text{C NMR}$  ( $\text{CDCl}_3$ , 101 MHz):  $\delta$  161.0, 160.1, 130.2, 128.9, 118.3, 114.0, 93.7, 55.5, 24.7. MS (EI, relative intensity, %)  $m/z$ : 174 (12), 173 ( $M^+$ , 100), 172 (14), 158 (30), 143 (14), 130 (16), 103 (30), 77 (13). HRMS (DART)  $m/z$ :  $[M + H]^+$  Calcd for  $\text{C}_{11}\text{H}_{12}\text{NO}$  174.09134; Found 174.09166.

**(E)-3-(4-Fluorophenyl)but-2-enenitrile ((E)-4d) [CAS RN: 1613466-41-3].**



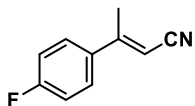

Pale yellow powder (31.0 mg, 64%).  $R_f = 0.60$  (hexane/EtOAc = 3/1).  $M_p = 51.0\text{--}51.5\text{ }^\circ\text{C}$ .  $^1\text{H NMR}$  ( $\text{CDCl}_3$ , 400 MHz):  $\delta$  7.49–7.43 (m, 2H), 7.13–7.06 (m, 2H), 5.58–5.57 (m, 1H), 2.46 (d,  $J = 0.9$  Hz, 3H).  $^{13}\text{C NMR}$  ( $\text{CDCl}_3$ , 101 MHz):  $\delta$  164.0 (d,  $J = 251.4$  Hz), 158.6, 134.5, 128.0 (d,  $J = 8.7$  Hz), 117.6, 116.0 (d,  $J = 22.2$  Hz), 95.6, 20.4.  $^{19}\text{F NMR}$  (376 MHz,  $\text{CDCl}_3$ ):  $\delta$  -111.2. MS (EI, relative intensity, %)  $m/z$ : 162 (11), 161 ( $M^+$ , 100), 160 (12), 146 (14), 134 (38), 133 (38), 126 (14), 121 (13), 101 (10), 96 (29). HRMS (DART)  $m/z$ :  $[M + H]^+$  Calcd for  $\text{C}_{10}\text{H}_9\text{NF}$  162.07135; Found 162.07240.

**(Z)-3-(4-Fluorophenyl)but-2-enitrile ((Z)-4d) [CAS RN: 144477-79-2].**

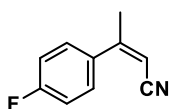

Pale yellow oil (6.8 mg, 14%).  $R_f = 0.48$  (hexane/EtOAc = 3/1).  $^1\text{H NMR}$  ( $\text{CDCl}_3$ , 400 MHz):  $\delta$  7.58–7.52 (c, 2H), 7.15–7.09 (c, 2H), 5.40 (q,  $J = 1.5$  Hz, 1H), 2.27 (d,  $J = 1.6$  Hz, 1H).  $^{13}\text{C NMR}$  ( $\text{CDCl}_3$ , 101 MHz):  $\delta$  163.6 (d,  $J = 250.5$  Hz), 159.8, 134.0, 129.3 (d,  $J = 8.7$  Hz), 117.6, 115.9 (d,  $J = 21.2$  Hz), 95.7, 24.8.  $^{19}\text{F NMR}$  (376 MHz,  $\text{CDCl}_3$ ):  $\delta$  -110.9. MS (EI, relative intensity, %)  $m/z$ : 162 (11), 161 ( $M^+$ , 100), 160 (11), 146 (14), 134 (33), 133 (35), 126 (12), 121 (13), 96 (26). HRMS (DART)  $m/z$ :  $[M + H]^+$  Calcd for  $\text{C}_{10}\text{H}_9\text{NF}$  162.07135; Found 162.07169.

**(E)-3-[4-(Trifluoromethyl)phenyl]but-2-enitrile ((E)-4e) [CAS RN: 1358804-70-2].**

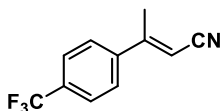

Pale yellow crystal (50.0 mg, 79%).  $R_f = 0.61$  (hexane/EtOAc = 2/1).  $M_p = 40.3\text{--}41.0\text{ }^\circ\text{C}$ .  $^1\text{H NMR}$  ( $\text{CDCl}_3$ , 400 MHz):  $\delta$  7.67 (d,  $J = 8.2$  Hz, 2H), 7.57 (d,  $J = 8.2$  Hz, 2H), 5.67 (d,  $J = 1.2$  Hz, 1H), 2.50 (d,  $J = 1.1$  Hz, 3H).  $^{13}\text{C NMR}$  ( $\text{CDCl}_3$ , 101 MHz):  $\delta$  158.5, 141.8, 132.1 (q,  $J = 32.8$  Hz), 126.4, 126.0 (q,  $J = 3.5$  Hz), 123.9 (q,  $J = 272.3$  Hz), 117.0, 97.9, 20.4.  $^{19}\text{F NMR}$  (376 MHz,  $\text{CDCl}_3$ ):  $\delta$  -63.4. MS (EI, relative intensity, %)  $m/z$ : 212 (12), 211 ( $M^+$ , 100), 192 (11), 191 (25), 190 (15), 171 (14), 151 (11), 140 (12), 115 (26). HRMS (DART)  $m/z$ :  $[M + H]^+$  Calcd for  $\text{C}_{11}\text{H}_9\text{NF}_3$  212.06816; Found 212.06800.

**(Z)-3-(4-Trifluoromethylphenyl)but-2-enitrile ((Z)-4e) [CAS RN: 2125749-93-9].**

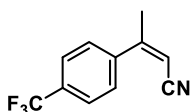

Pale yellow oil (5.0 mg, 8%).  $R_f = 0.48$  (hexane/EtOAc = 2/1).  $^1\text{H NMR}$  ( $\text{CDCl}_3$ , 400 MHz):  $\delta$  7.71 (d,  $J = 8.2$  Hz, 2H), 7.63 (d,  $J = 8.0$  Hz, 2H), 5.50 (d,  $J = 1.5$  Hz, 1H), 2.31 (d,  $J = 1.6$  Hz, 3H).  $^{13}\text{C NMR}$  ( $\text{CDCl}_3$ , 101 MHz):  $\delta$  159.8, 141.5, 131.8 (q,  $J = 32.8$  Hz), 127.6, 125.9 (q,  $J = 3.5$  Hz), 123.8 (q,  $J = 272.3$  Hz), 117.0, 97.5, 24.7.  $^{19}\text{F NMR}$

(376 MHz, CDCl<sub>3</sub>):  $\delta$  -63.4. MS (EI, relative intensity, %)  $m/z$ : 212 (12), 211 (M<sup>+</sup>, 100), 192 (13), 191 (25), 190 (16), 151 (14), 141 (10), 140 (14), 115 (35). HRMS (DART)  $m/z$ : [M + H]<sup>+</sup> Calcd for C<sub>11</sub>H<sub>9</sub>NF<sub>3</sub> 212.06816; Found 212.06905.

**(E)-3-(Naphthalen-2-yl)but-2-enitrile ((E)-4f) [CAS RN: 1622876-07-6].**

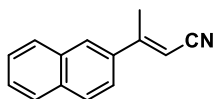

Pale yellow solid (41.9 mg, 72%, isolated by preparative HPLC).  $R_f$  = 0.66 (hexane/EtOAc = 2/1). Mp = 57.3–58.0 °C. <sup>1</sup>H NMR (CDCl<sub>3</sub>, 400 MHz):  $\delta$  7.94 (d,  $J$  = 1.6 Hz, 1H), 7.90–7.83 (c, 3H), 7.57–7.51 (c, 3H), 5.77 (t,  $J$  = 0.9 Hz, 1H), 2.59 (d,  $J$  = 0.9 Hz, 3H). <sup>13</sup>C NMR (CDCl<sub>3</sub>, 101 MHz):  $\delta$  159.5, 135.4, 134.1, 133.0, 128.8, 128.7, 127.8, 127.5, 127.0, 126.2, 122.9, 117.9, 95.9, 20.3. MS (EI, relative intensity, %)  $m/z$ : 194 (15), 193 (M<sup>+</sup>, 100), 192 (20), 165 (17), 128 (23). HRMS (DART)  $m/z$ : [M + H]<sup>+</sup> Calcd for C<sub>14</sub>H<sub>12</sub>N 194.09643; Found 194.09582.

**(Z)-3-(Naphthalen-2-yl)but-2-enitrile ((Z)-4f) [CAS RN: 1622876-33-8].**

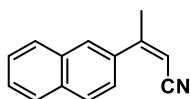

Colorless oil (6.7 mg, 12%, isolated by preparative HPLC).  $R_f$  = 0.57 (hexane/EtOAc = 2/1). <sup>1</sup>H NMR (CDCl<sub>3</sub>, 400 MHz):  $\delta$  8.02 (d,  $J$  = 1.4 Hz, 1H), 7.91–7.84 (c, 3H), 7.65 (dd,  $J$  = 8.7, 1.8 Hz, 1H), 7.56–7.50 (c, 2H), 5.48 (dd,  $J$  = 3.0, 1.6 Hz, 1H), 2.38 (d,  $J$  = 1.4 Hz, 3H). <sup>13</sup>C NMR (CDCl<sub>3</sub>, 101 MHz):  $\delta$  161.0, 135.4, 133.9, 133.0, 128.7, 128.6, 127.8, 127.3, 127.1, 126.8, 124.4, 117.8, 95.8, 24.9. MS (EI, relative intensity, %)  $m/z$ : 194 (16), 193 (M<sup>+</sup>, 100), 192 (19), 165 (17), 128 (22). HRMS (DART)  $m/z$ : [M + H]<sup>+</sup> Calcd for C<sub>14</sub>H<sub>12</sub>N 194.09643; Found 194.09575.

**Methyl (E)-5-cyano-3,3,4-trimethylpent-4-enoate ((E)-4g).**

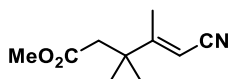

Colorless oil (27.3 mg, 50%).  $R_f$  = 0.32 (hexane/EtOAc = 3/1). <sup>1</sup>H NMR (CDCl<sub>3</sub>, 400 MHz):  $\delta$  5.20 (s, 1H), 3.64 (s, 3H), 2.46 (s, 2H), 2.11 (s, 3H), 1.21 (s, 6H). <sup>13</sup>C NMR (CDCl<sub>3</sub>, 101 MHz):  $\delta$  171.1, 169.9, 117.6, 95.2, 51.7, 44.9, 39.9, 26.9, 18.1. MS (EI, relative intensity, %)  $m/z$ : 181 (M<sup>+</sup>, 10), 150 (26), 149 (60), 139 (15), 134 (13), 122 (21), 121 (42), 108 (100), 107 (56), 106 (100), 95 (11), 94 (11), 93 (14), 81 (41), 80 (22), 79 (37), 74 (15) 73 (10). HRMS (DART)  $m/z$ : [M + H]<sup>+</sup> Calcd for C<sub>10</sub>H<sub>16</sub>NO<sub>2</sub> 182.11756; Found 182.11748.

## 6. Large-Scale Preparation of 2a

A 50 mL of two-necked flask was dried with a heat gun and purged with N<sub>2</sub>. After allowing the flask to cool to room temperature, **1a** (1.0 g, 3.3 mmol), *t*-BuOK (37.5 mg, 0.33 mmol, 10 mol%), IMes·HCl (57.0 mg, 0.17 mmol, 5 mol%), (IMes)Pd(allyl)Cl (81.2 mg, 0.17 mmol, 5 mol%), and toluene (17 mL) were added. After the reaction mixture

was then stirred at 120 °C for 24 h, the resulting mixture was filtered through a pad of Celite and the filtrate further eluted with EtOAc. The crude mixture was concentrated under reduced pressure and purified by flash column chromatography over silica gel to afford **2a** as a white solid (504.7 mg, 99% yield).

## 7. Mechanistic Studies

### Control Experiment.

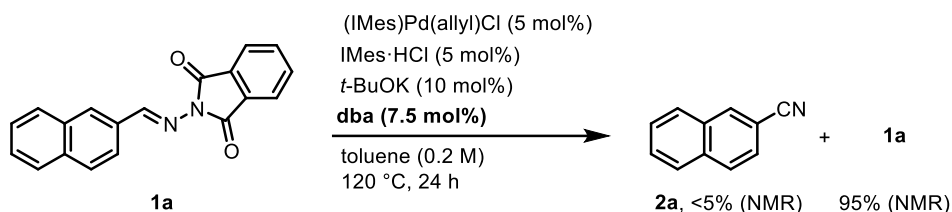

**Scheme S2** A control experiment in the presence of dba. Yields were determined by <sup>1</sup>H NMR analysis using 1,1,2,2-tetrachloroethane as the internal standard.

### KIE experiment.

Six oven-dried 25 mL of J. Young Schlenk flasks were allowed to cool to room temperature and filled with nitrogen. To each of these Schlenk flasks, *t*-BuOK (1.1 mg, 0.01 mmol, 10 mol%), IMes·HCl (1.7 mg, 0.005 mmol, 5 mol%), (IMes)Pd(allyl)Cl (2.4 mg, 0.005 mmol, 5 mol%), and toluene (0.25 mL) were added. The mixtures were then stirred at room temperature for 5 min, after which, **1a** (30.0 mg, 0.1 mmol) and toluene (0.25 mL) were added to each Schlenk flask. The Schlenk flasks were sealed with a J. Young cap and the reaction mixtures were stirred at 120 °C. At set intervals, the reaction mixtures were quickly placed in an ice bath. The resulting mixture was filtered through a pad of Celite and the filtrate further eluted with EtOAc. The concentrated crude mixture was analyzed by <sup>1</sup>H NMR using 1,1,2,2-tetrachloroethane as an internal standard. The same monitoring experiments were executed three times. The reaction of **1a**-[D<sub>1</sub>] (30.1 mg, 0.1 mmol) was also monitored following the same procedure.

| <b>1a</b> |              |                  | <b>2a</b> |           |                  |
|-----------|--------------|------------------|-----------|-----------|------------------|
| time [h]  | recovery [%] | <i>c</i> [mol/L] | time [h]  | yield [%] | <i>c</i> [mol/L] |
| 0         | 100          | 0.2              | 0         | 0         | 0                |
| 0.25      | 86.8         | 0.174            | 0.25      | 9.3       | 0.019            |
| 0.50      | 73.9         | 0.148            | 0.50      | 24.3      | 0.049            |
| 0.75      | 59.7         | 0.119            | 0.75      | 39.1      | 0.078            |
| 1         | 49.8         | 0.100            | 1         | 48.9      | 0.098            |
| 2         | 27.0         | 0.054            | 2         | 71.2      | 0.142            |
| 3         | 12.8         | 0.026            | 3         | 86.7      | 0.173            |

**Table S2** Tabular data for the reaction with **1**.

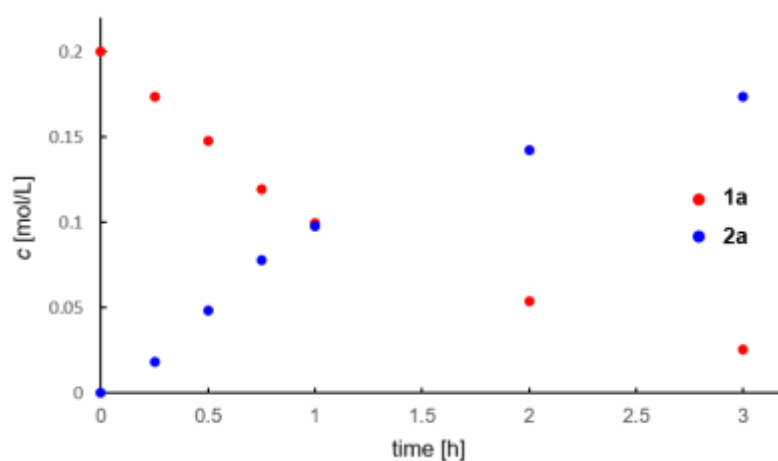

**Figure S1** Reaction profiles for the reaction with **1**.

| <b>1a-[D<sub>1</sub>]</b> |              |           | <b>2a</b> |           |           |
|---------------------------|--------------|-----------|-----------|-----------|-----------|
| time [h]                  | recovery [%] | c [mol/L] | time [h]  | yield [%] | c [mol/L] |
| 0                         | 100          | 0.2       | 0         | 0         | 0         |
| 0.25                      | 95.5         | 0.191     | 0.25      | 3.0       | 0.006     |
| 0.50                      | 89.6         | 0.180     | 0.50      | 7.1       | 0.014     |
| 0.75                      | 80.2         | 0.160     | 0.75      | 16.5      | 0.033     |
| 1                         | 70.9         | 0.142     | 1         | 24.2      | 0.048     |
| 2                         | 44.7         | 0.0892    | 2         | 53.3      | 0.107     |
| 3                         | 34.0         | 0.0682    | 3         | 58.1      | 0.116     |

**Table S3** Tabular data for the reaction with **1a-[D<sub>1</sub>]**.

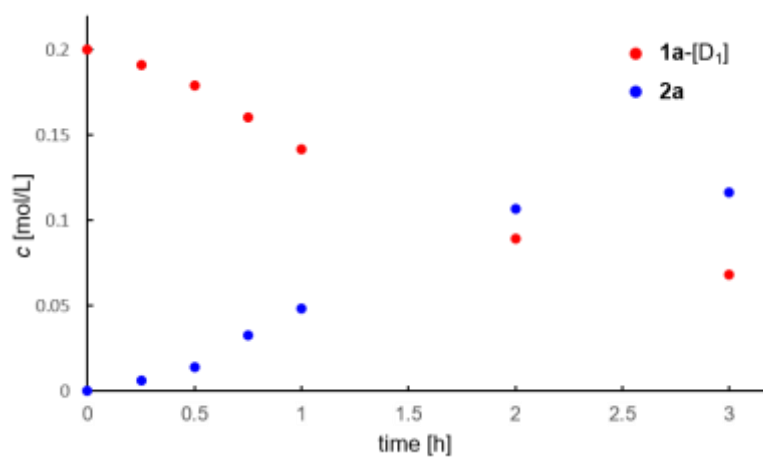

**Figure S2** Reaction profiles for the reaction with **1a-[D<sub>1</sub>]**.

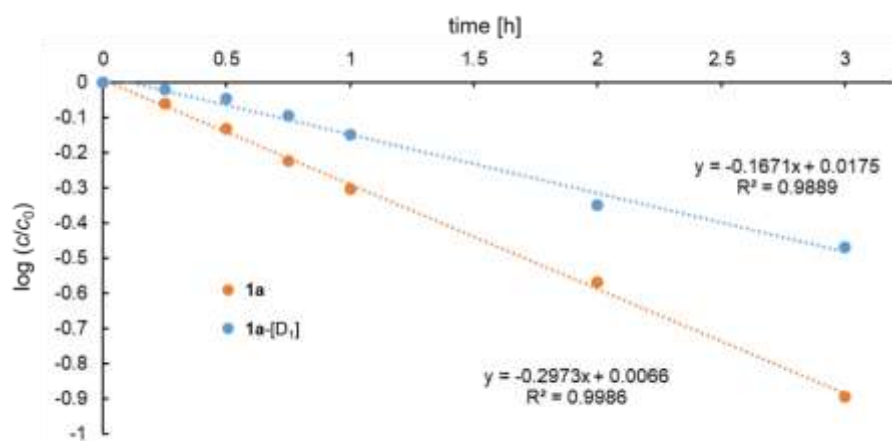

**Figure S3** H/D kinetic isotope effect for the reaction of **1a** and **1a**-[D<sub>1</sub>].

## 8. References

1. S. Ushijima and H. Togo, *Synlett*, **2010**, 1562–1566.
2. M. Hatsuda and M. Seki, *Tetrahedron*, **2005**, *61*, 9908–9917.
3. R. A. Abramovitch and B. W. Cue, *J. Org. Chem.*, **1980**, *45*, 5316–5319.
4. T. Itou, Y. Yoshimi, T. Morita, Y. Tokunaga and M. Hatanaka, *Tetrahedron*, **2009**, *65*, 263–269.

# 9. Copies of $^1\text{H}$ , $^{13}\text{C}$ , and $^{19}\text{F}$ NMR Spectra

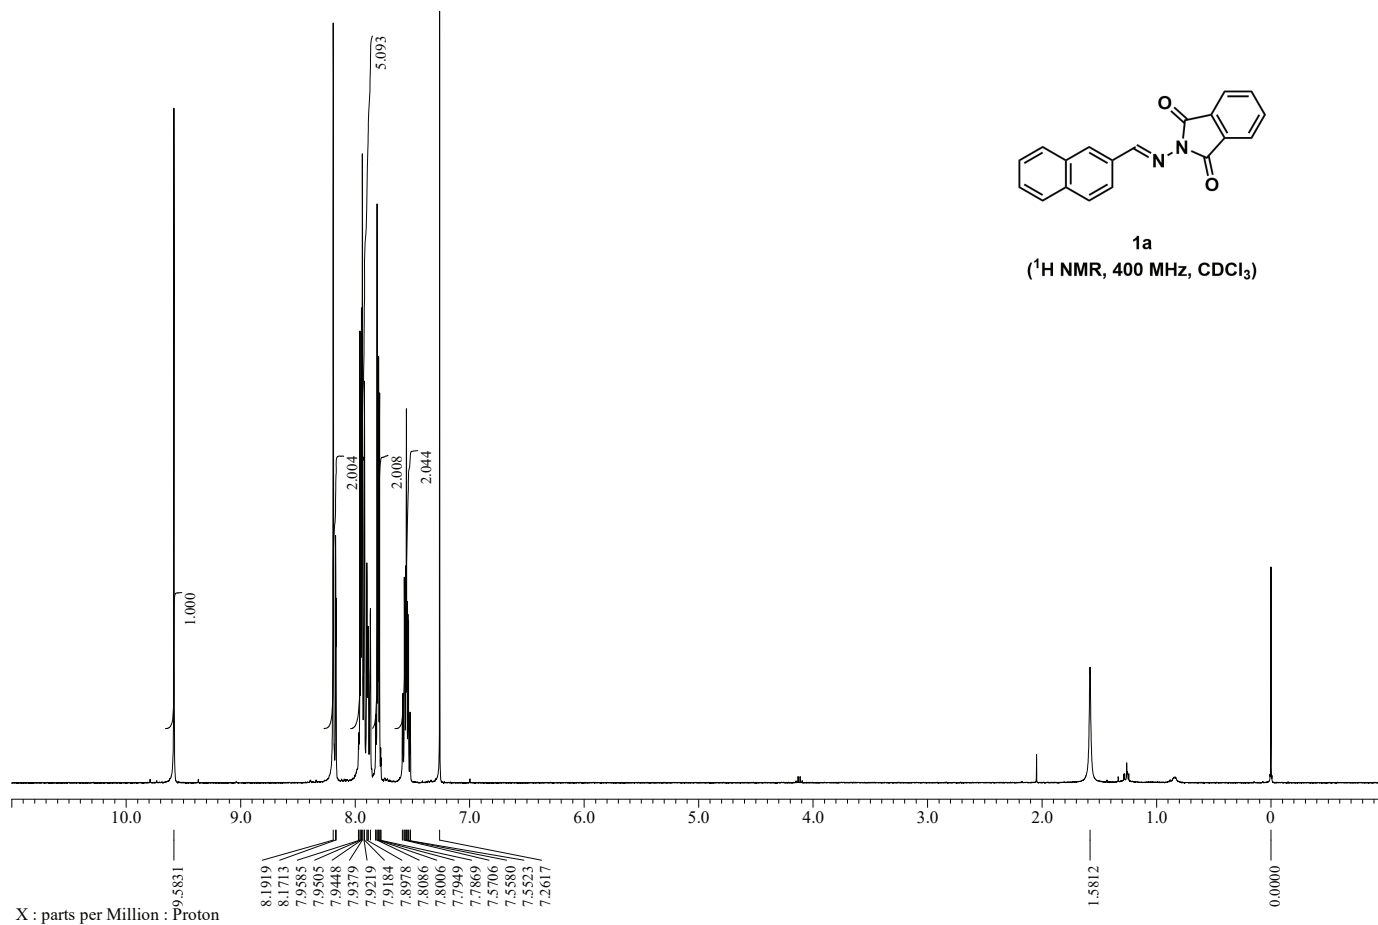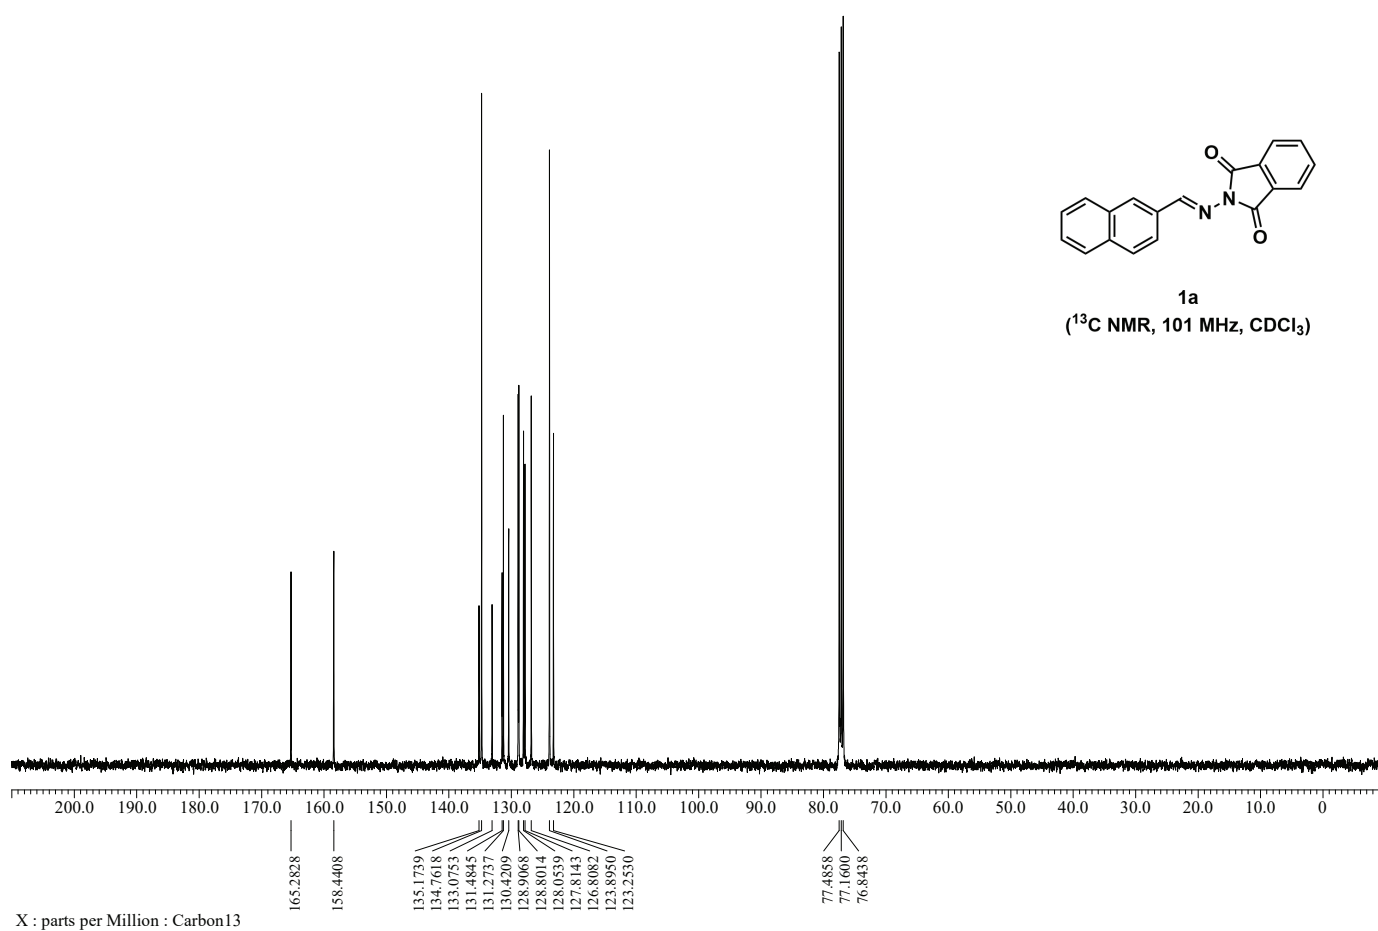

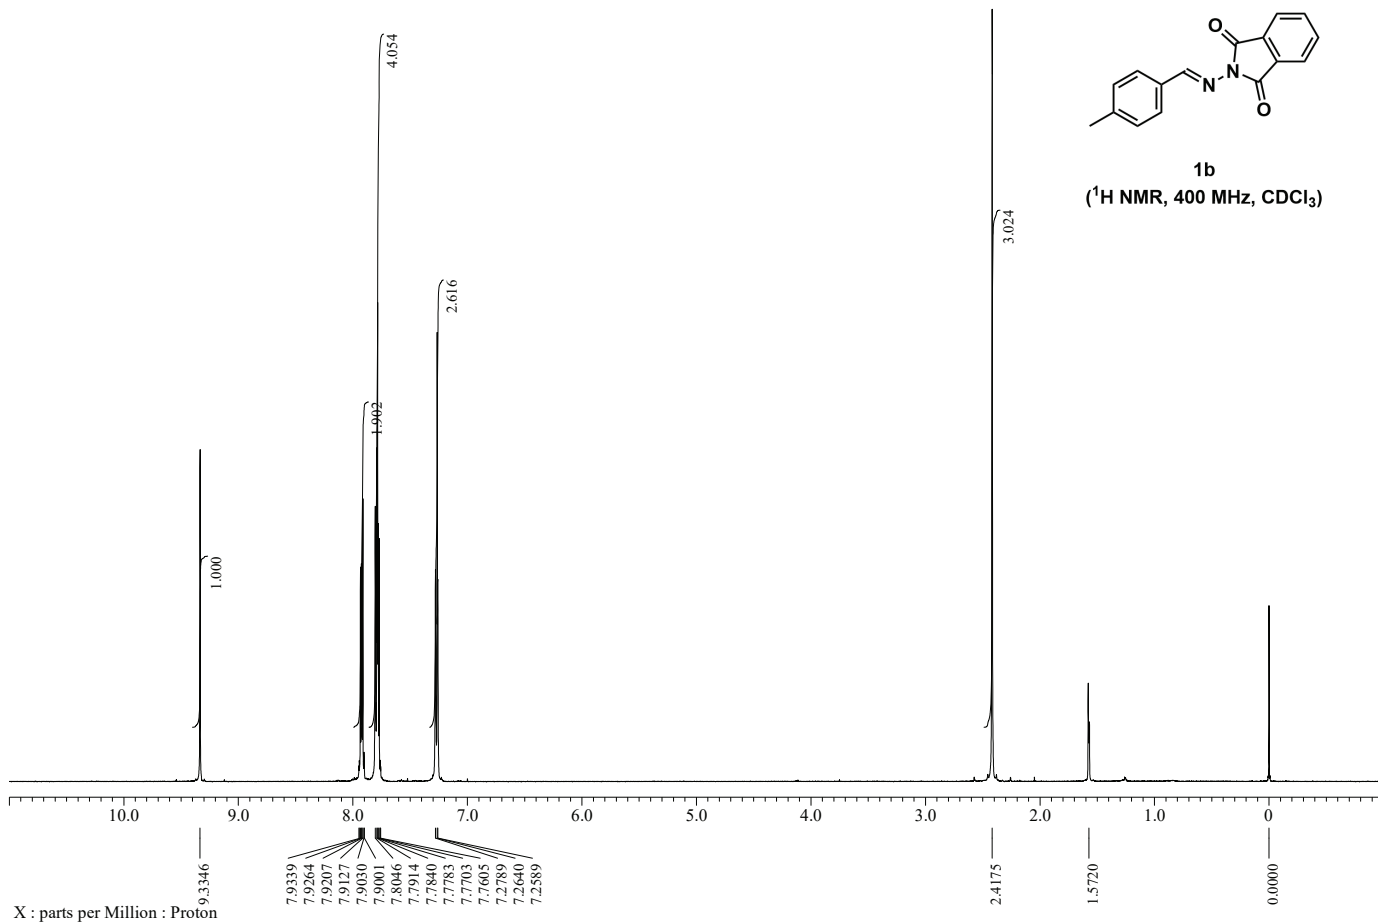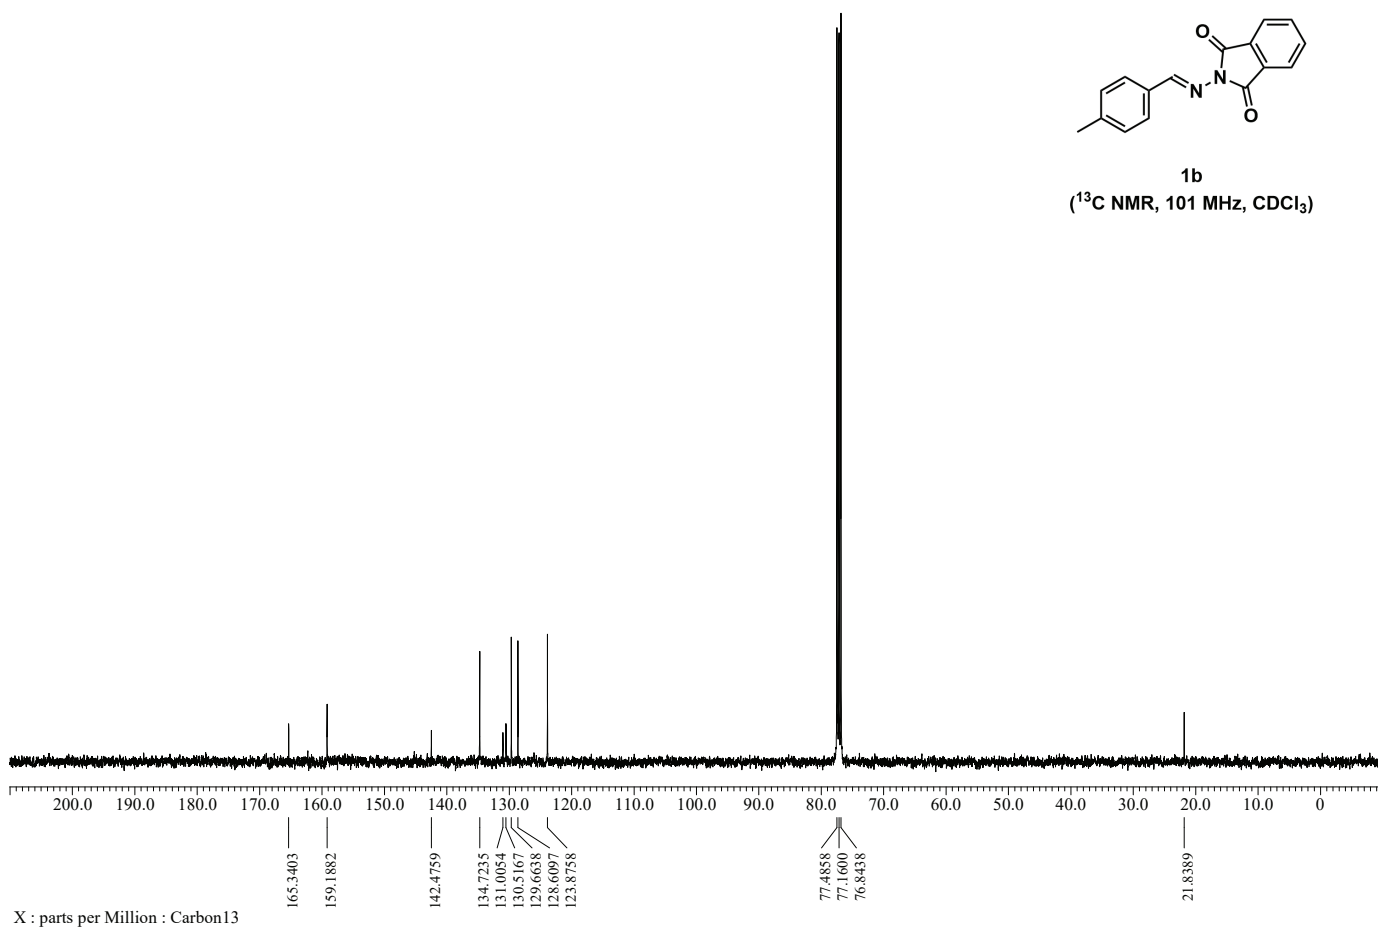

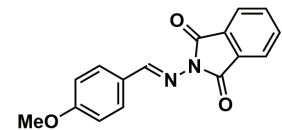

1c  
(<sup>1</sup>H NMR, 400 MHz, CDCl<sub>3</sub>)

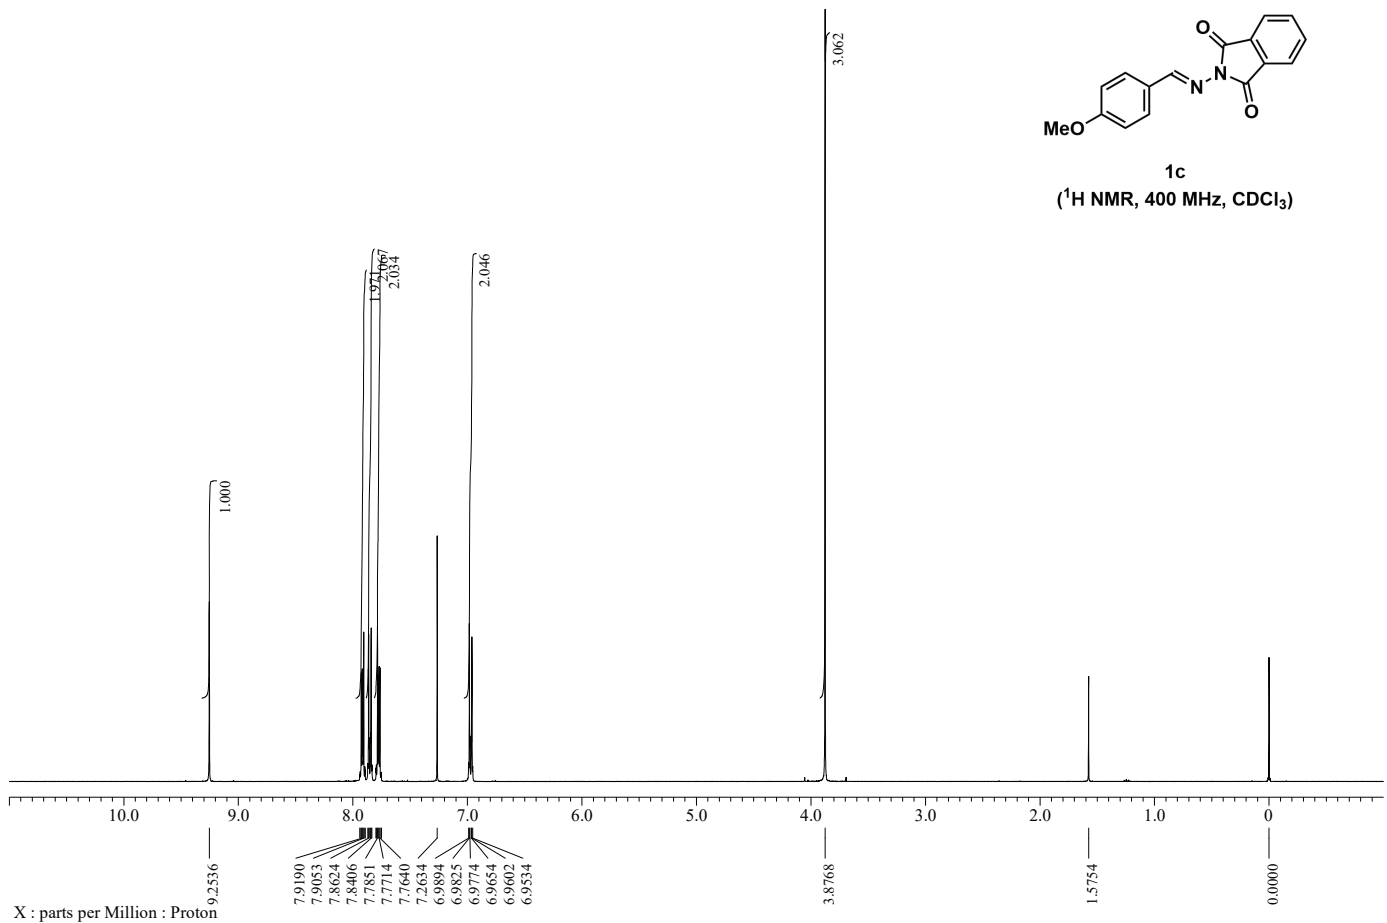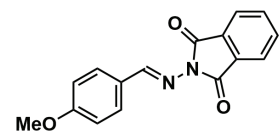

1c  
(<sup>13</sup>C NMR, 101 MHz, CDCl<sub>3</sub>)

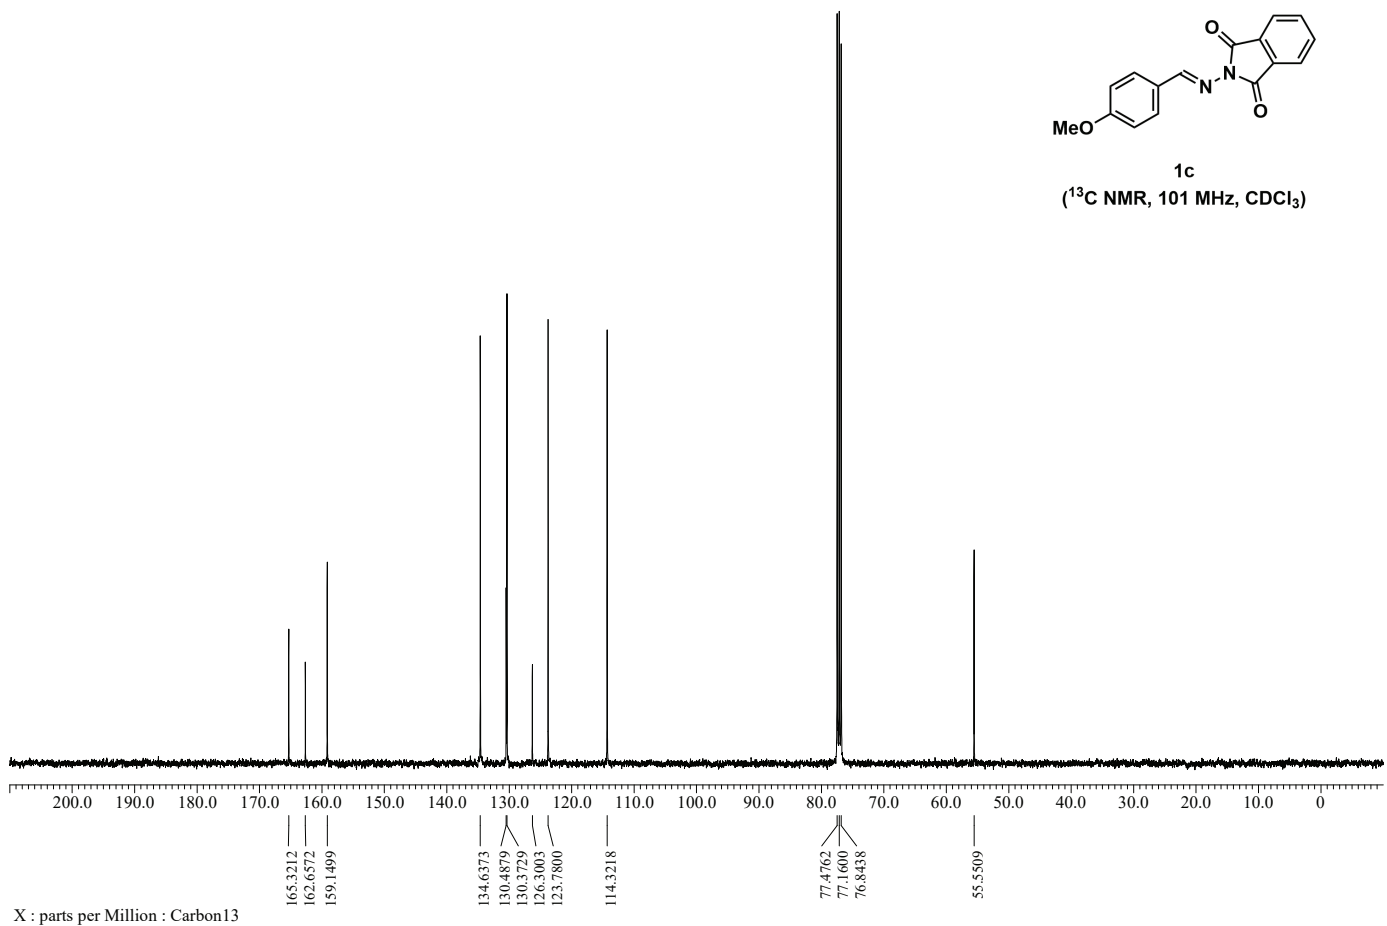



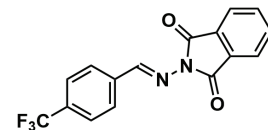

**1d**  
 $^1\text{H NMR}$ , 400 MHz,  $\text{CDCl}_3$

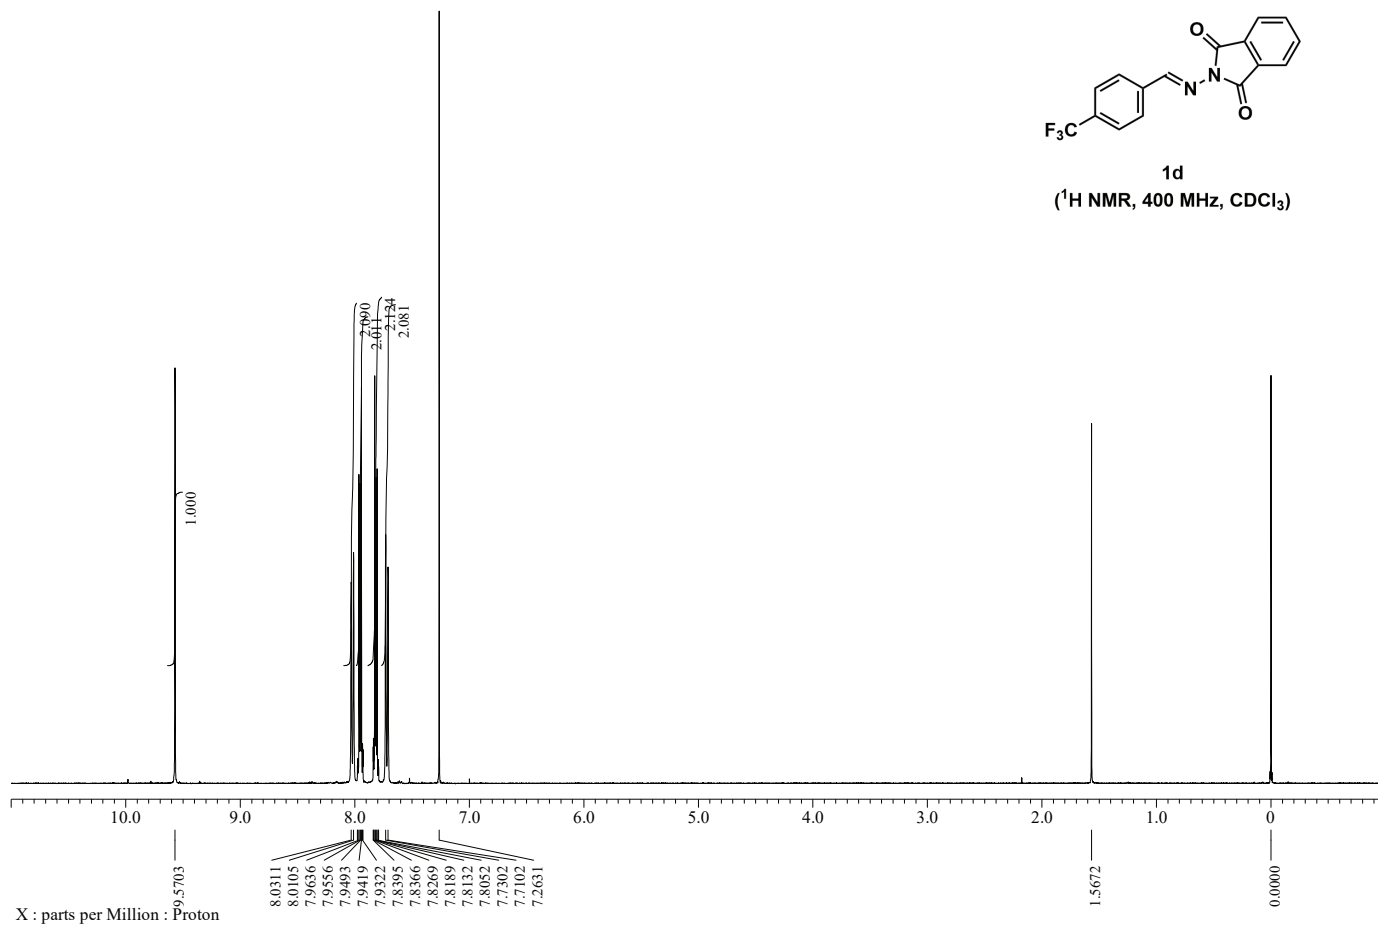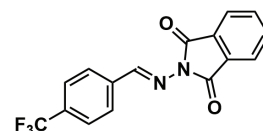

**1d**  
 $^{13}\text{C NMR}$ , 101 MHz,  $\text{CDCl}_3$

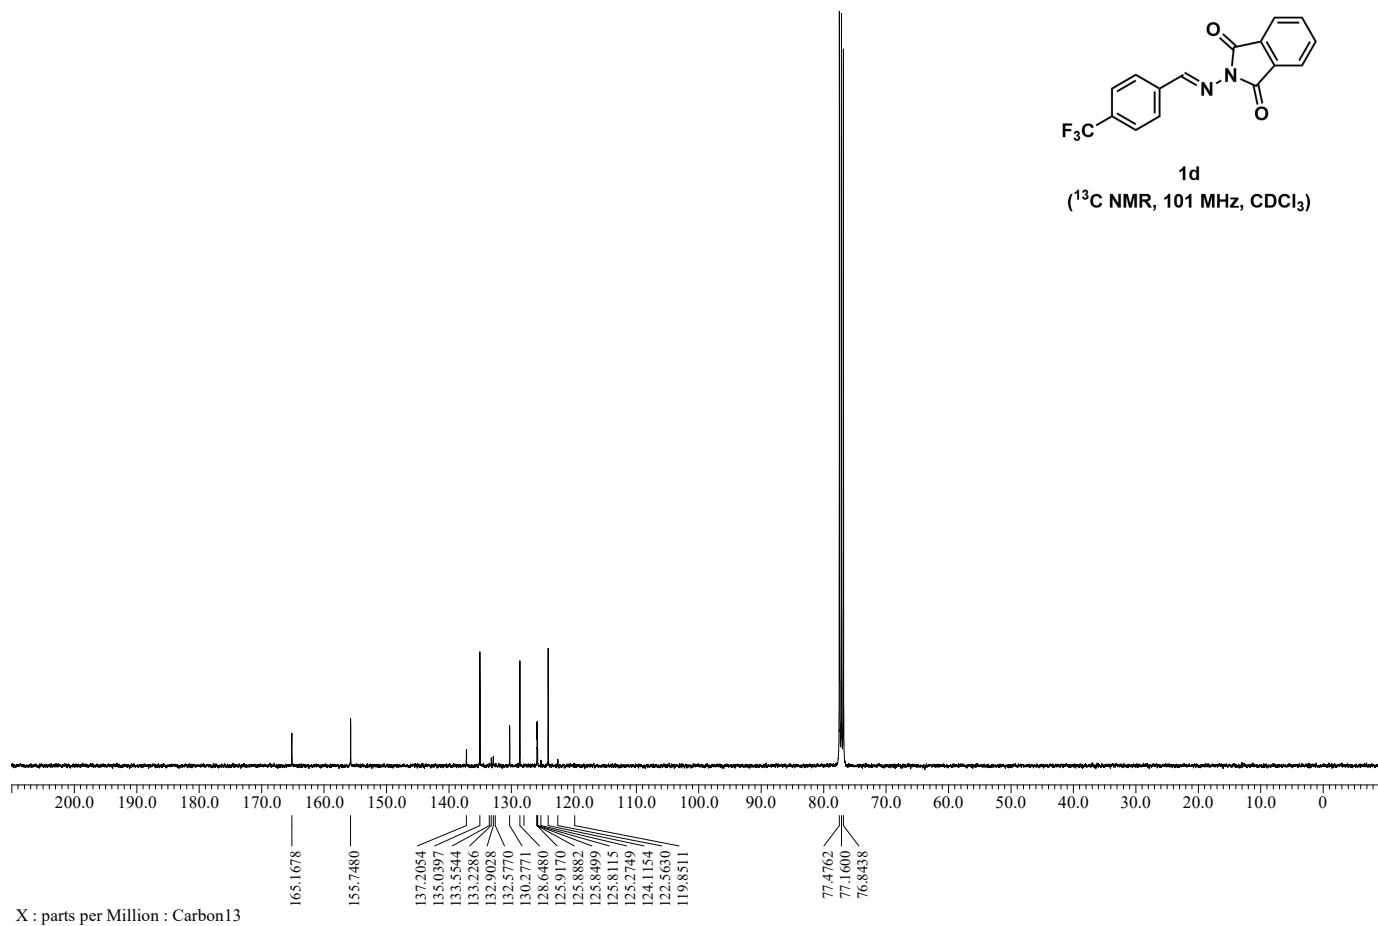

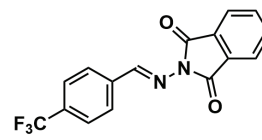

**1d**  
(<sup>19</sup>F NMR, 376 MHz, CDCl<sub>3</sub>)

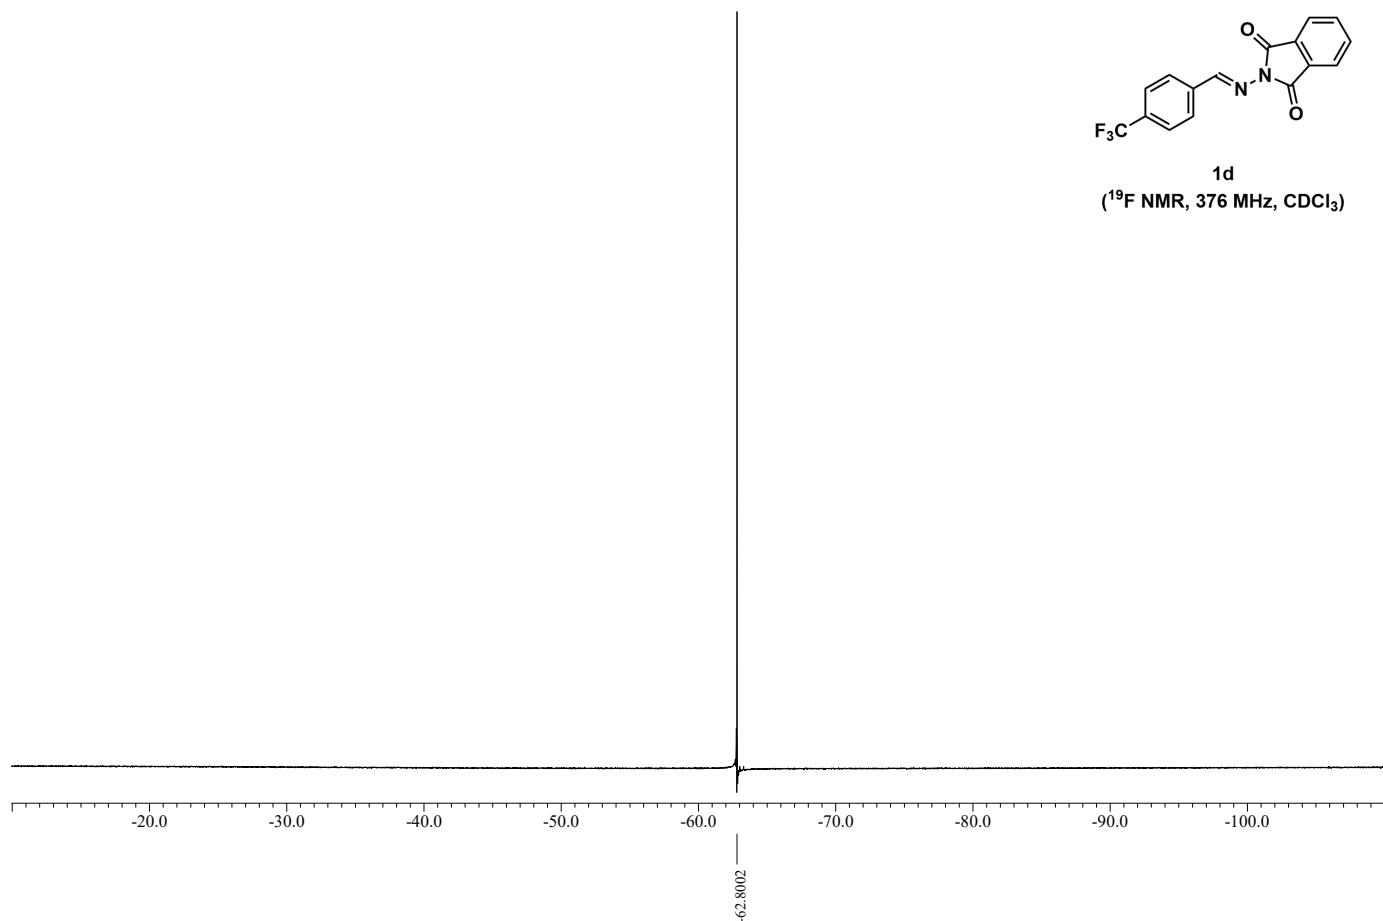

X : parts per Million : Fluorine19

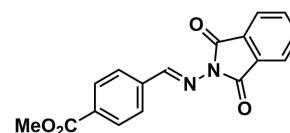

**1e**  
(<sup>1</sup>H NMR, 400 MHz, CDCl<sub>3</sub>)

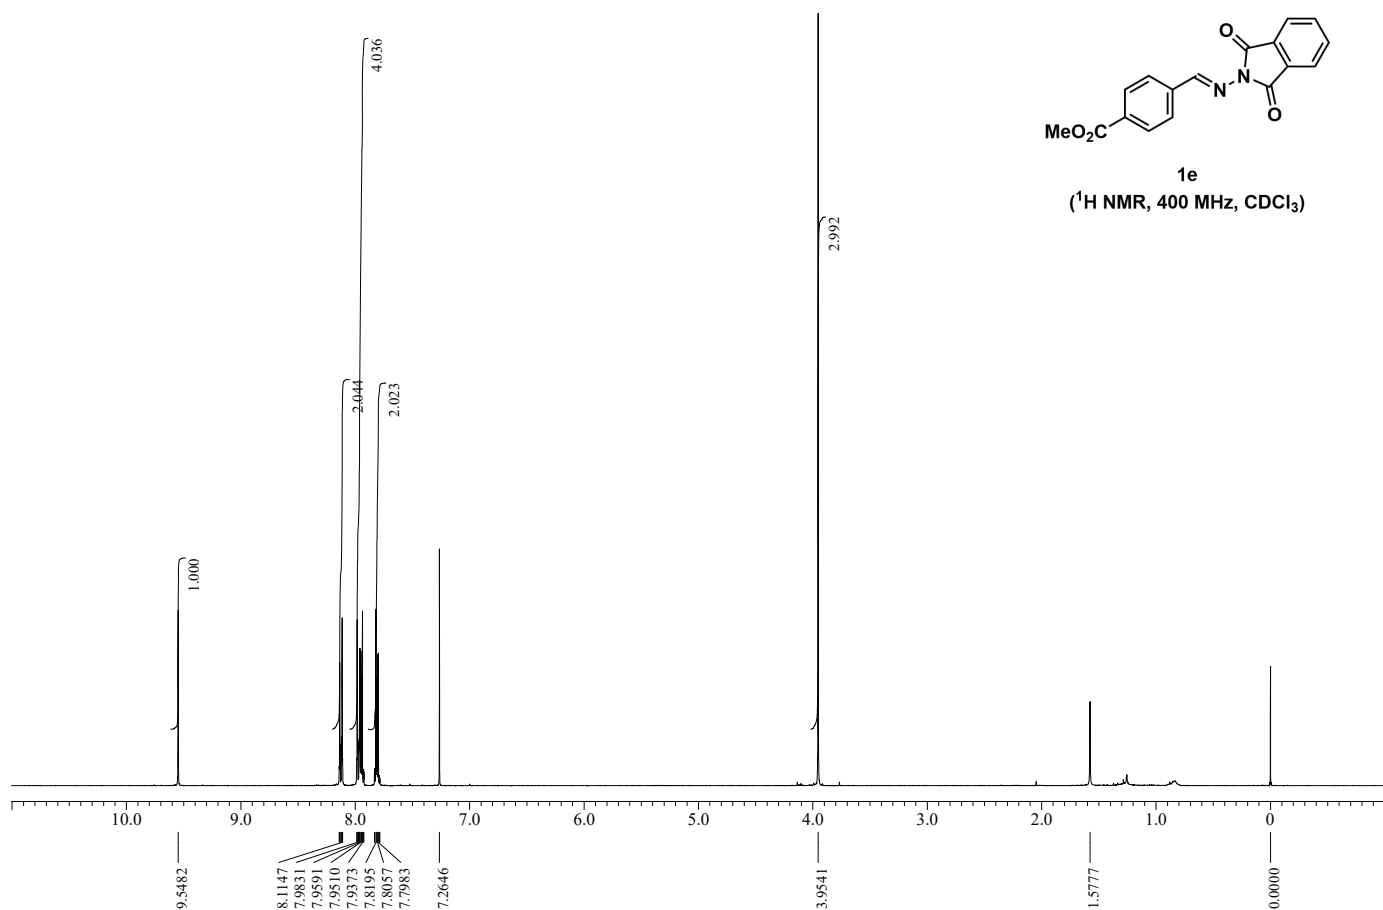

X : parts per Million : Proton

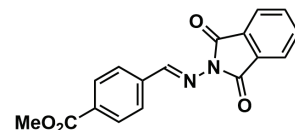

**1e**  
 (<sup>13</sup>C NMR, 101 MHz, CDCl<sub>3</sub>)

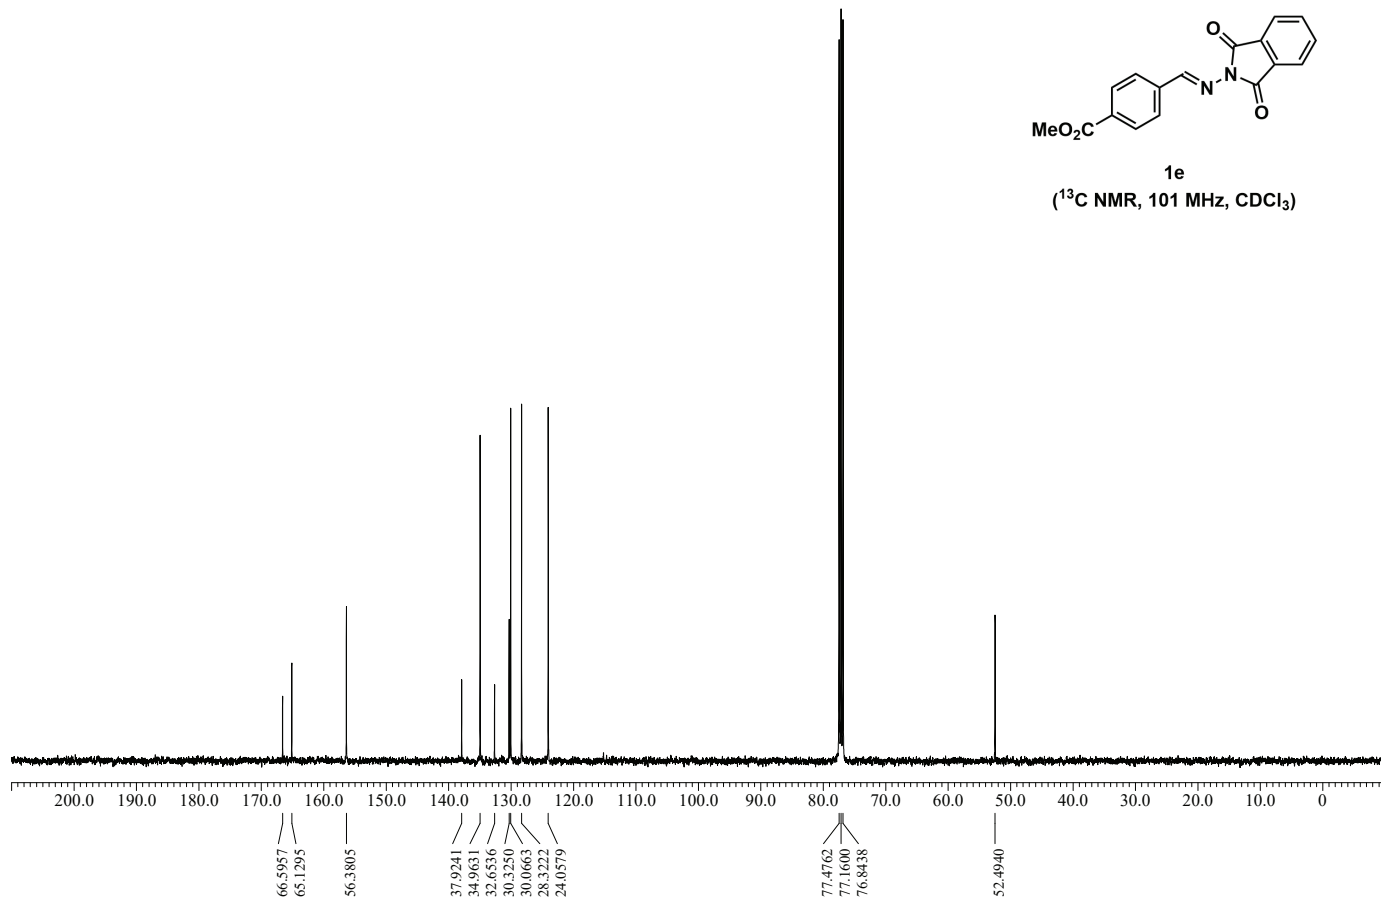

X : parts per Million : Carbon13

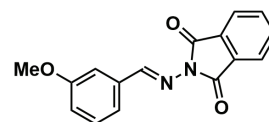

**1f**  
 (<sup>1</sup>H NMR, 400 MHz, CDCl<sub>3</sub>)

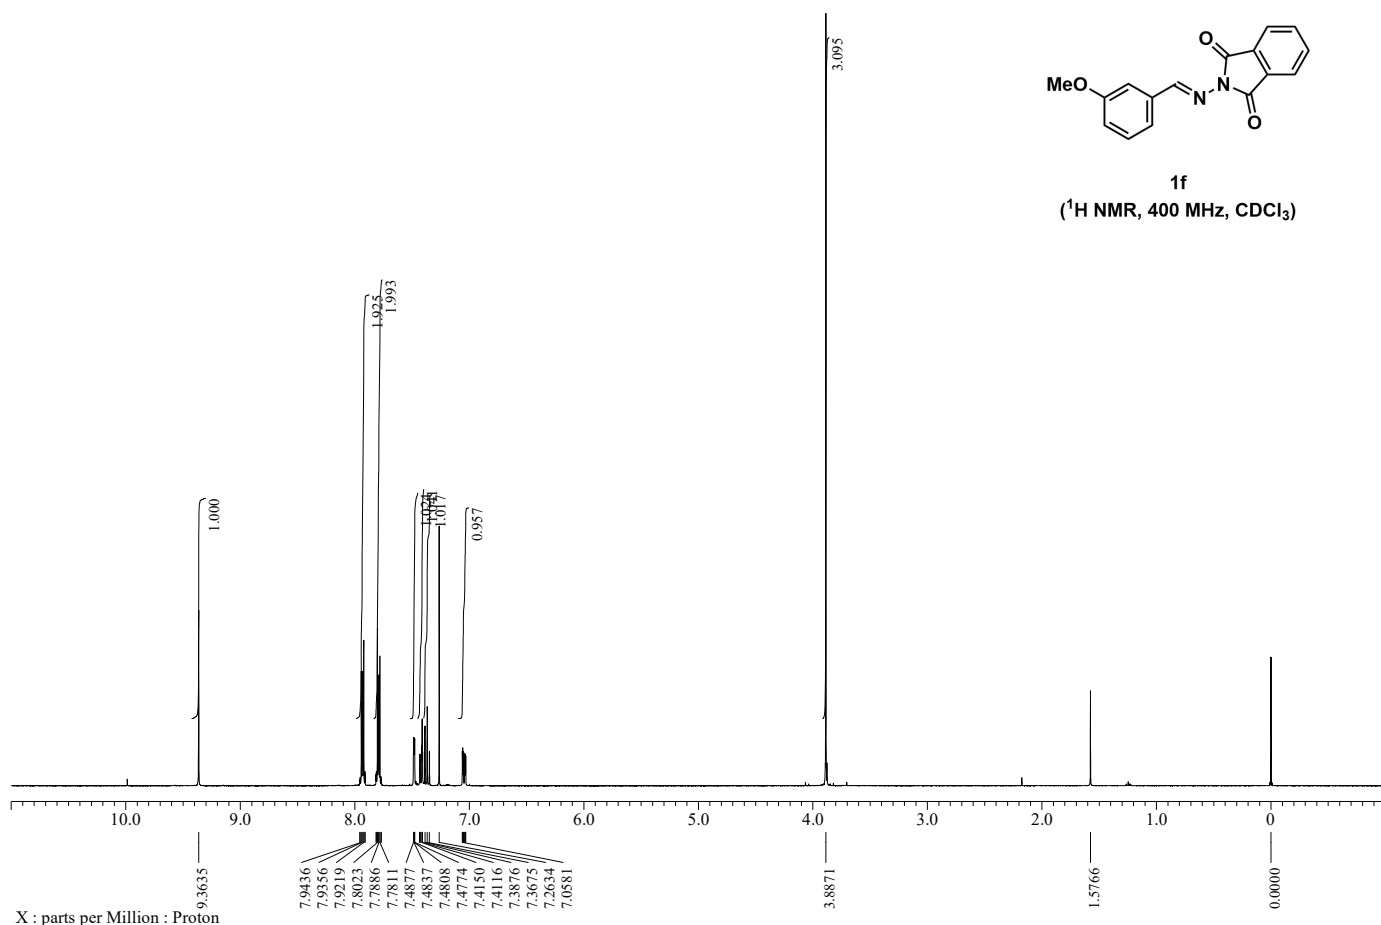

X : parts per Million : Proton

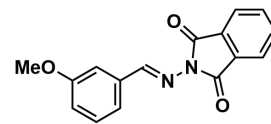

**1f**  
(<sup>13</sup>C NMR, 101 MHz, CDCl<sub>3</sub>)

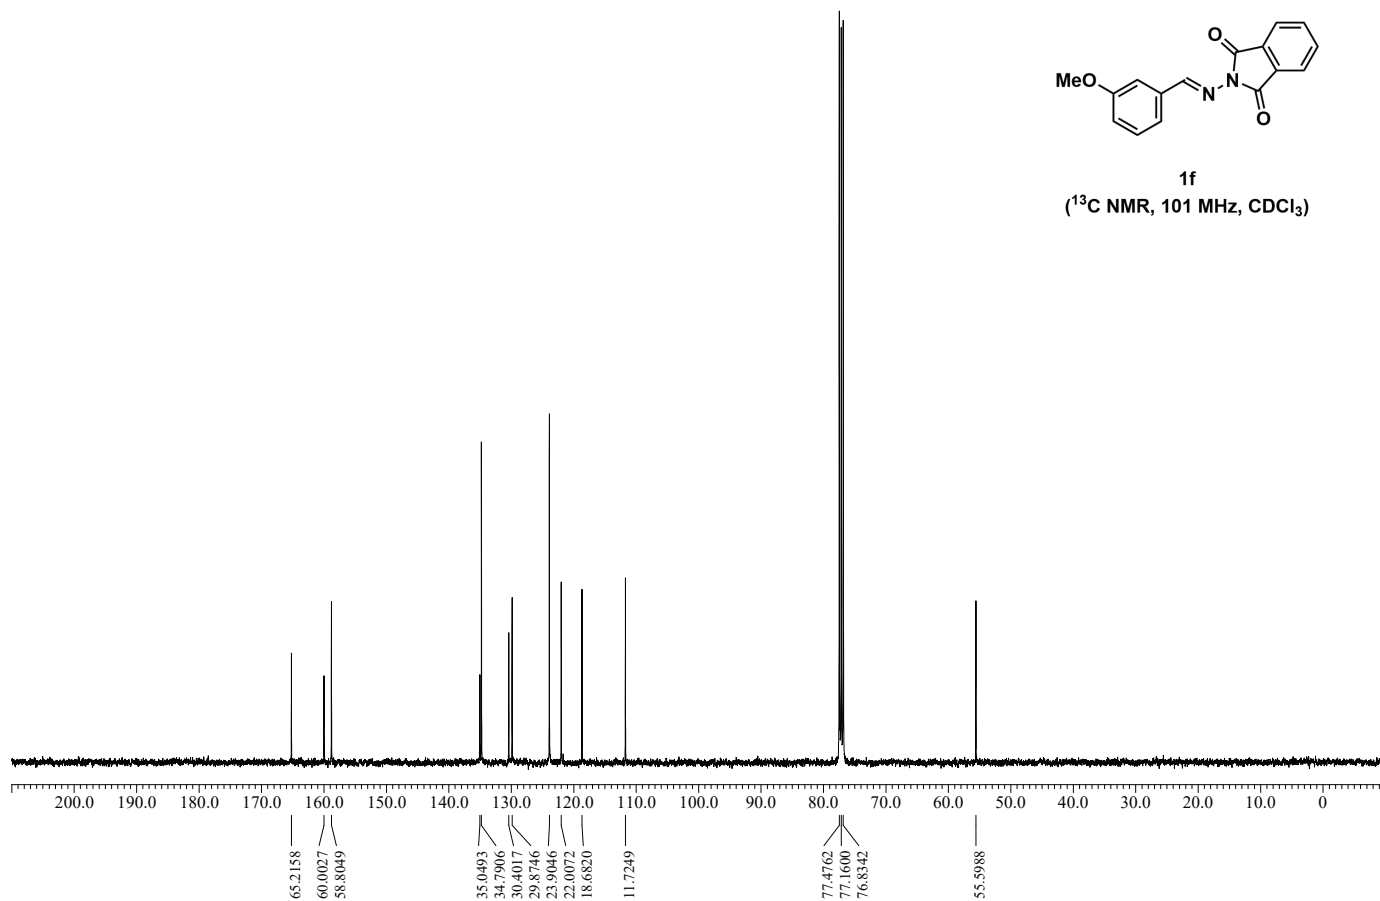

X : parts per Million : Carbon13

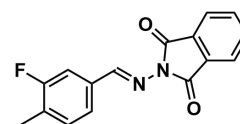

**1g**  
(<sup>1</sup>H NMR, 400 MHz, CDCl<sub>3</sub>)

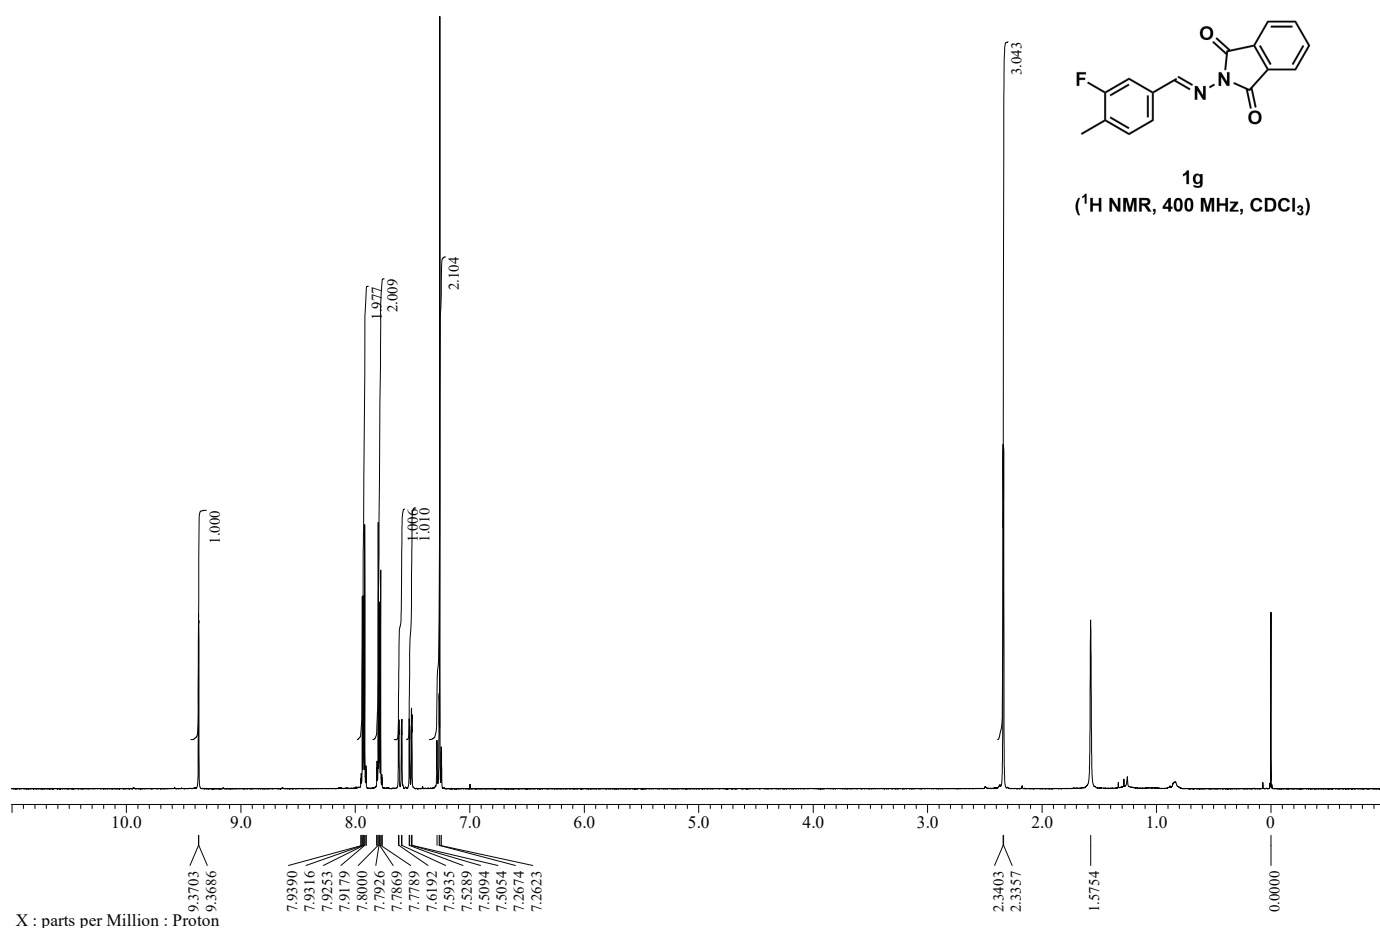

X : parts per Million : Proton

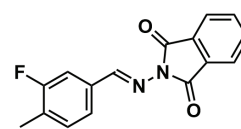

1g  
(<sup>13</sup>C NMR, 101 MHz, CDCl<sub>3</sub>)

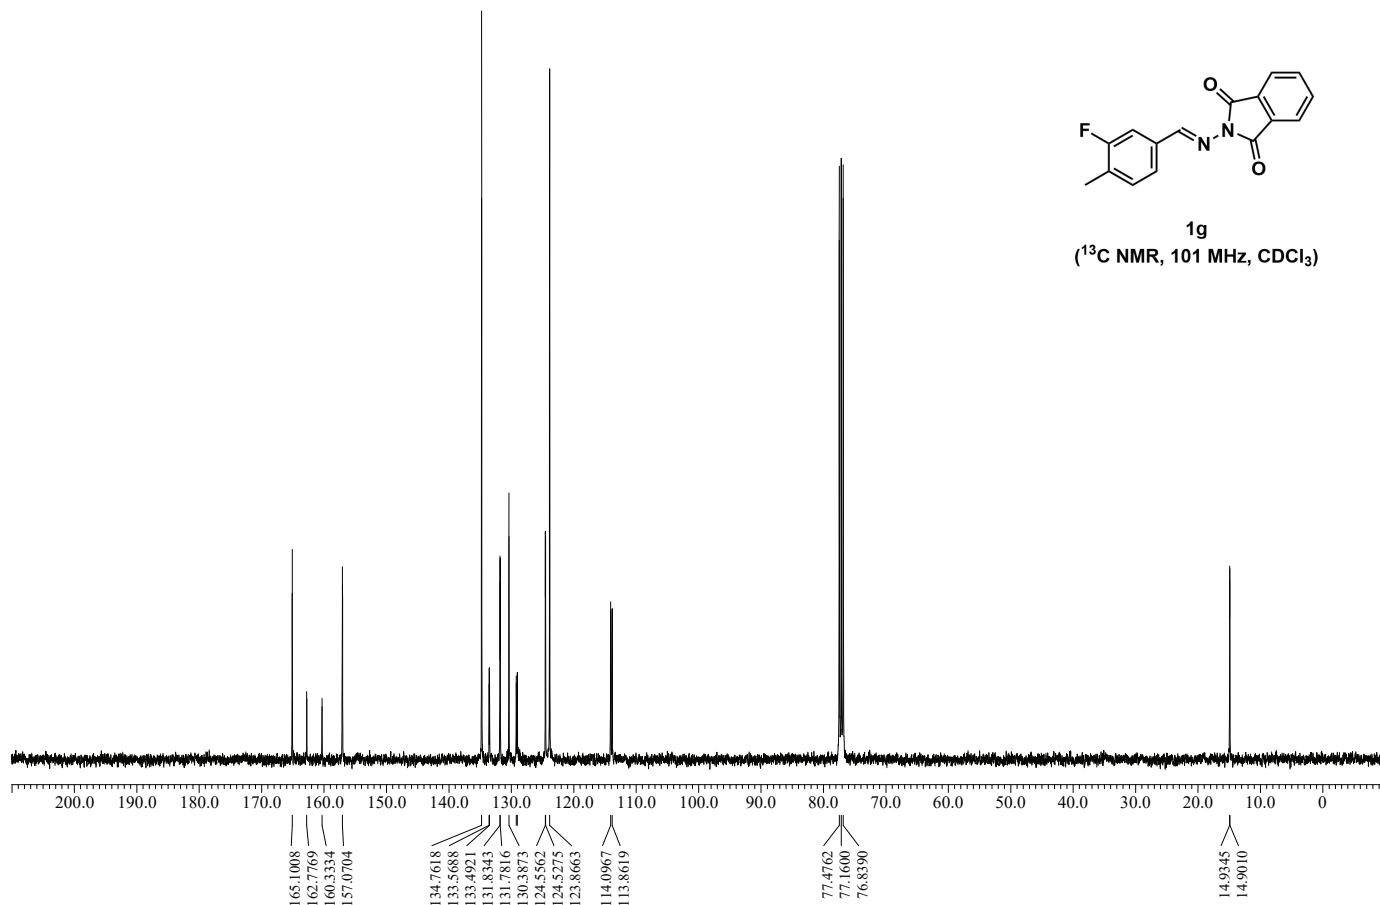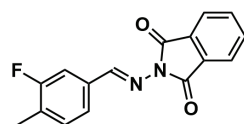

1g  
(<sup>19</sup>F NMR, 376 MHz, CDCl<sub>3</sub>)

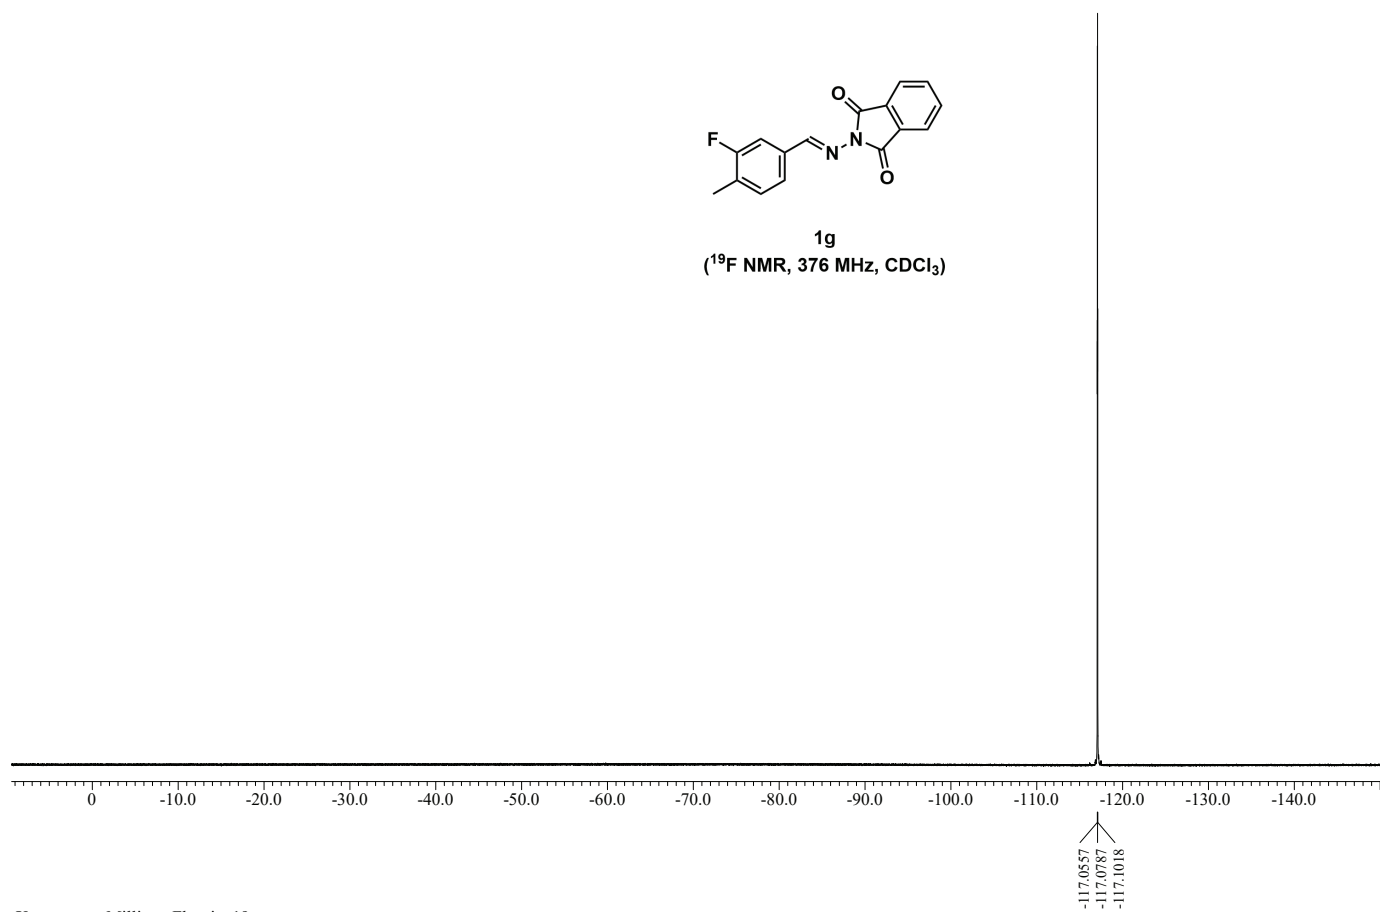

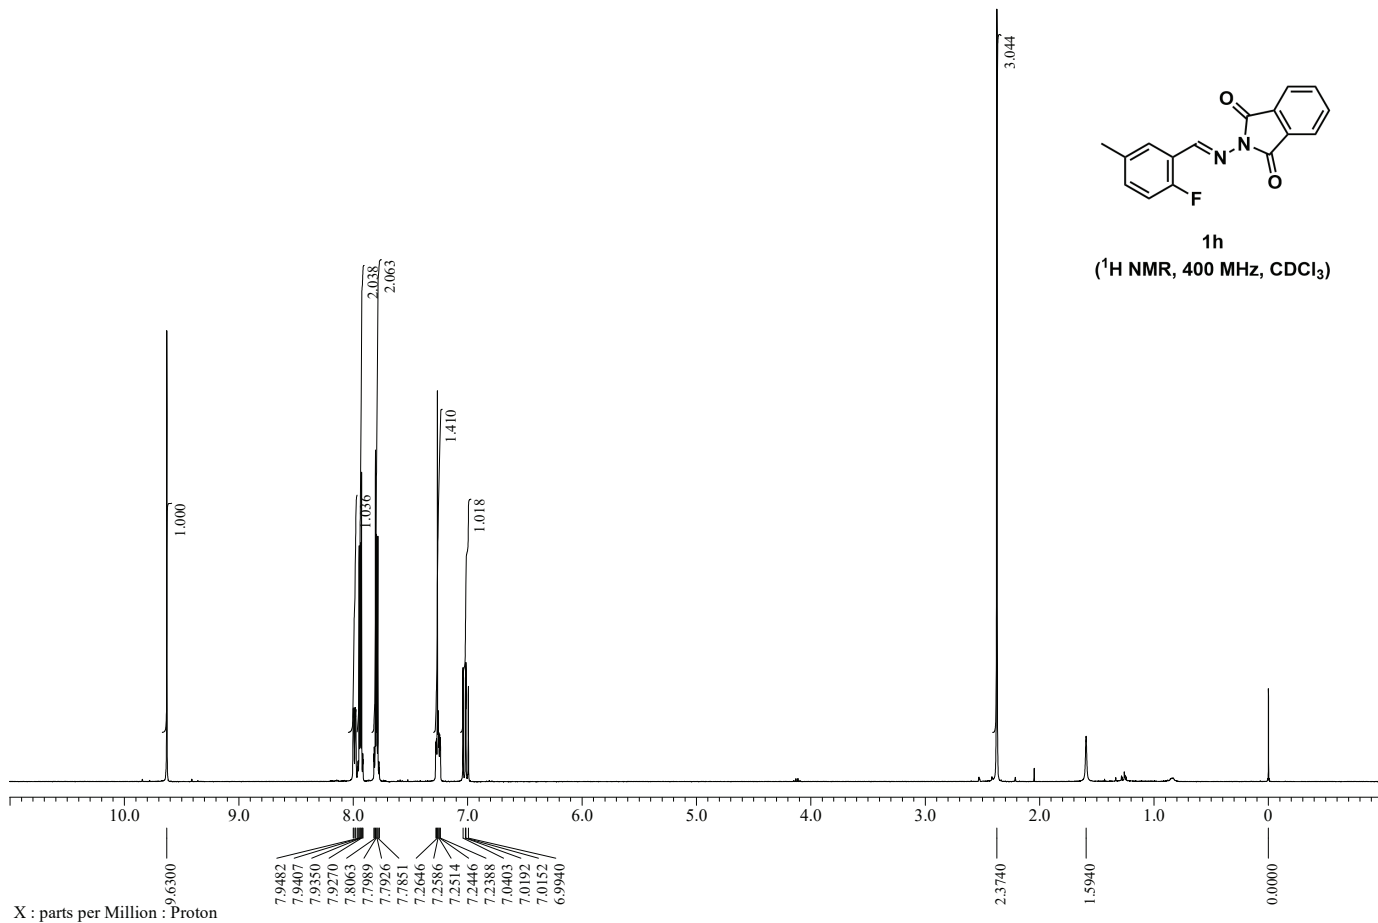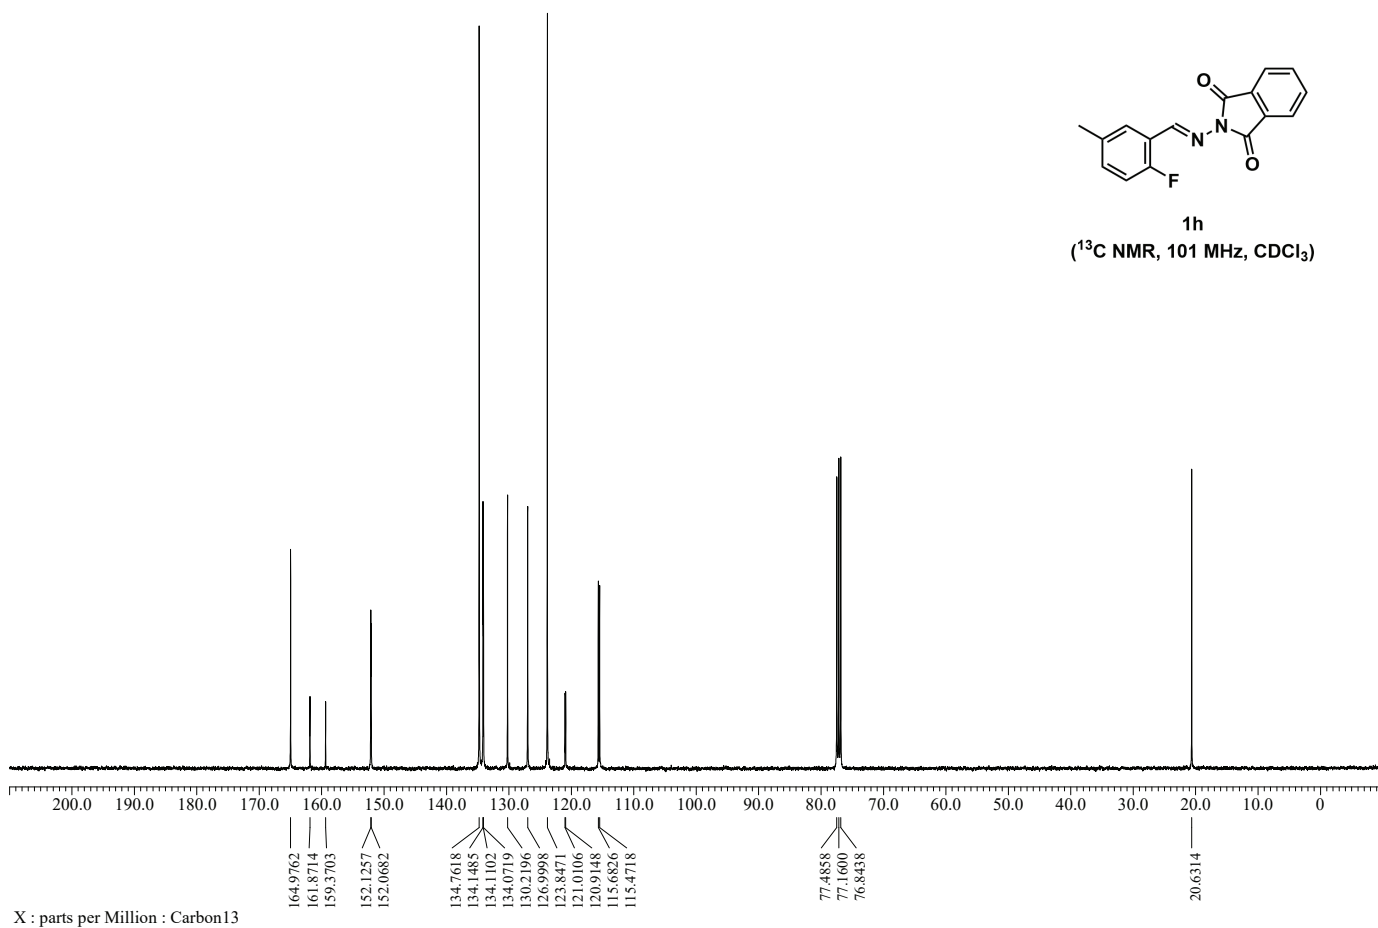

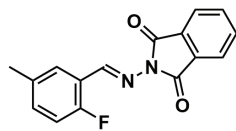

**1h**  
 (<sup>19</sup>F NMR, 376 MHz, CDCl<sub>3</sub>)

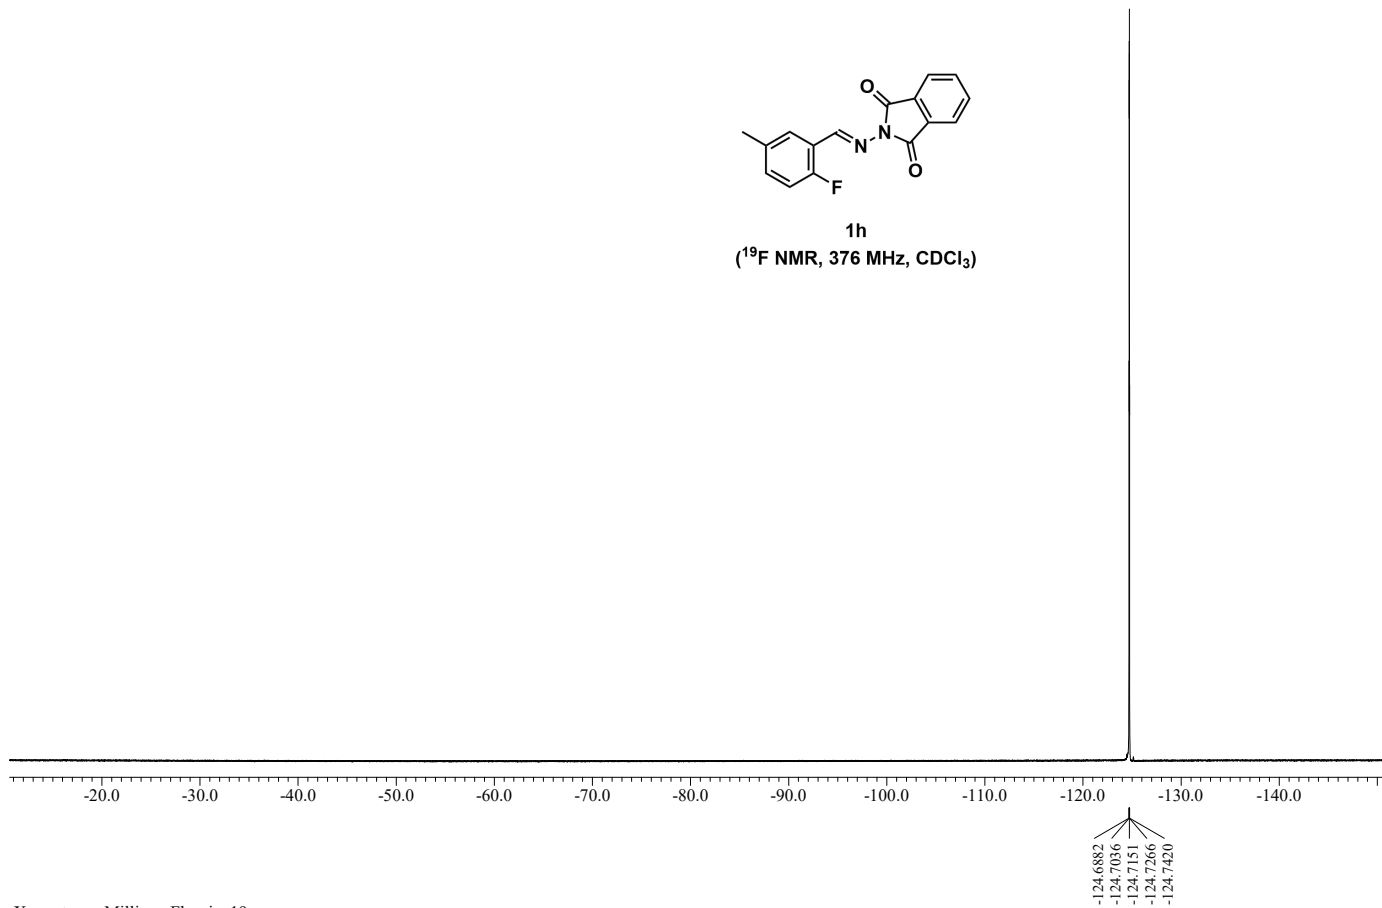

X : parts per Million : Fluorine19

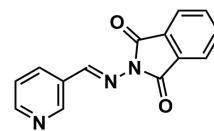

**1i**  
 (<sup>1</sup>H NMR, 400 MHz, CDCl<sub>3</sub>)

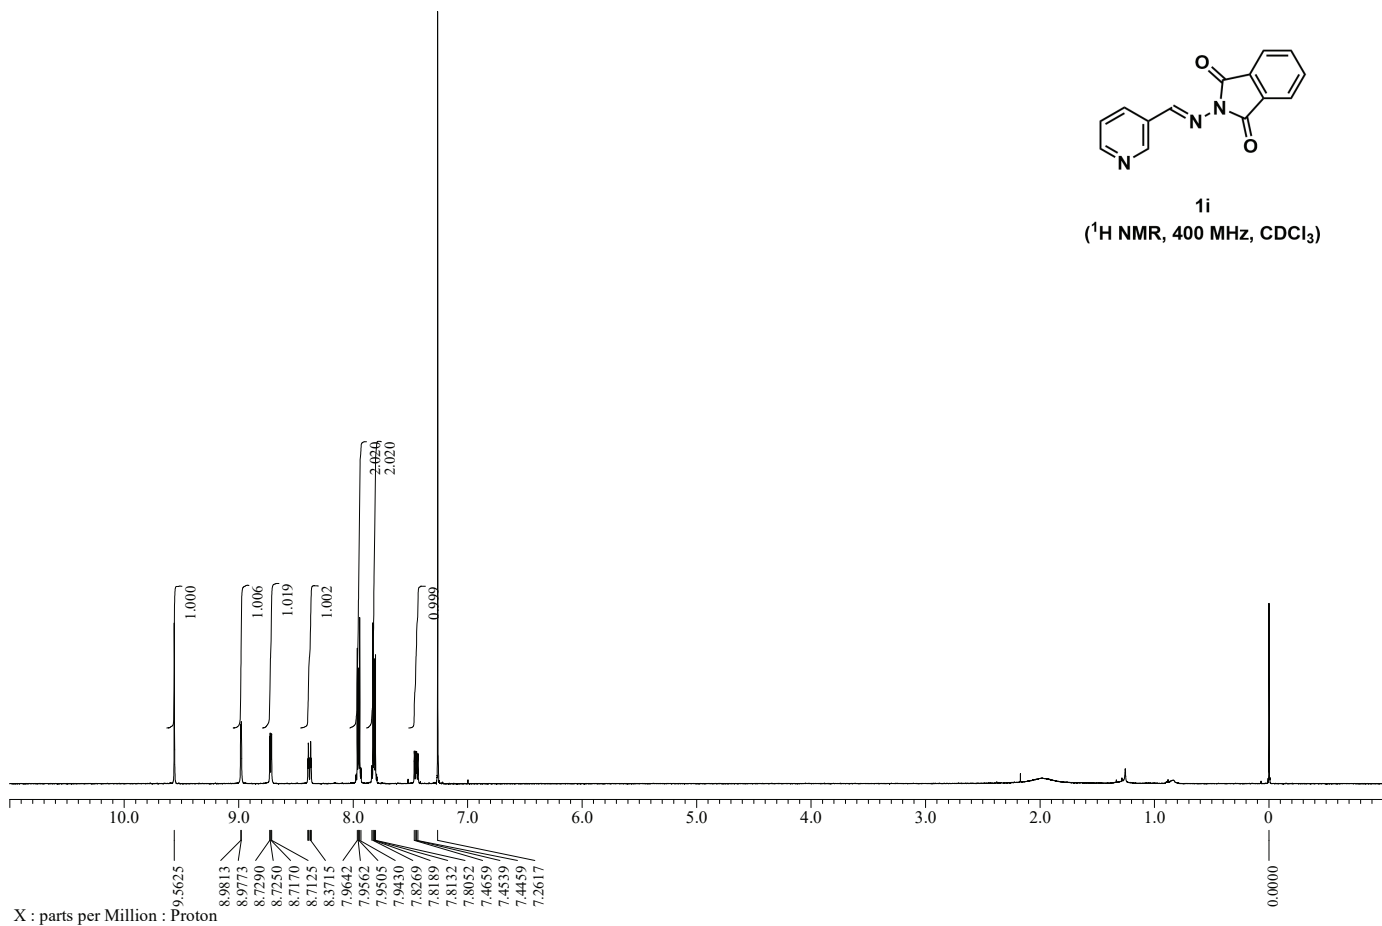

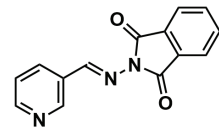

1i  
<sup>13</sup>C NMR, 101 MHz, CDCl<sub>3</sub>

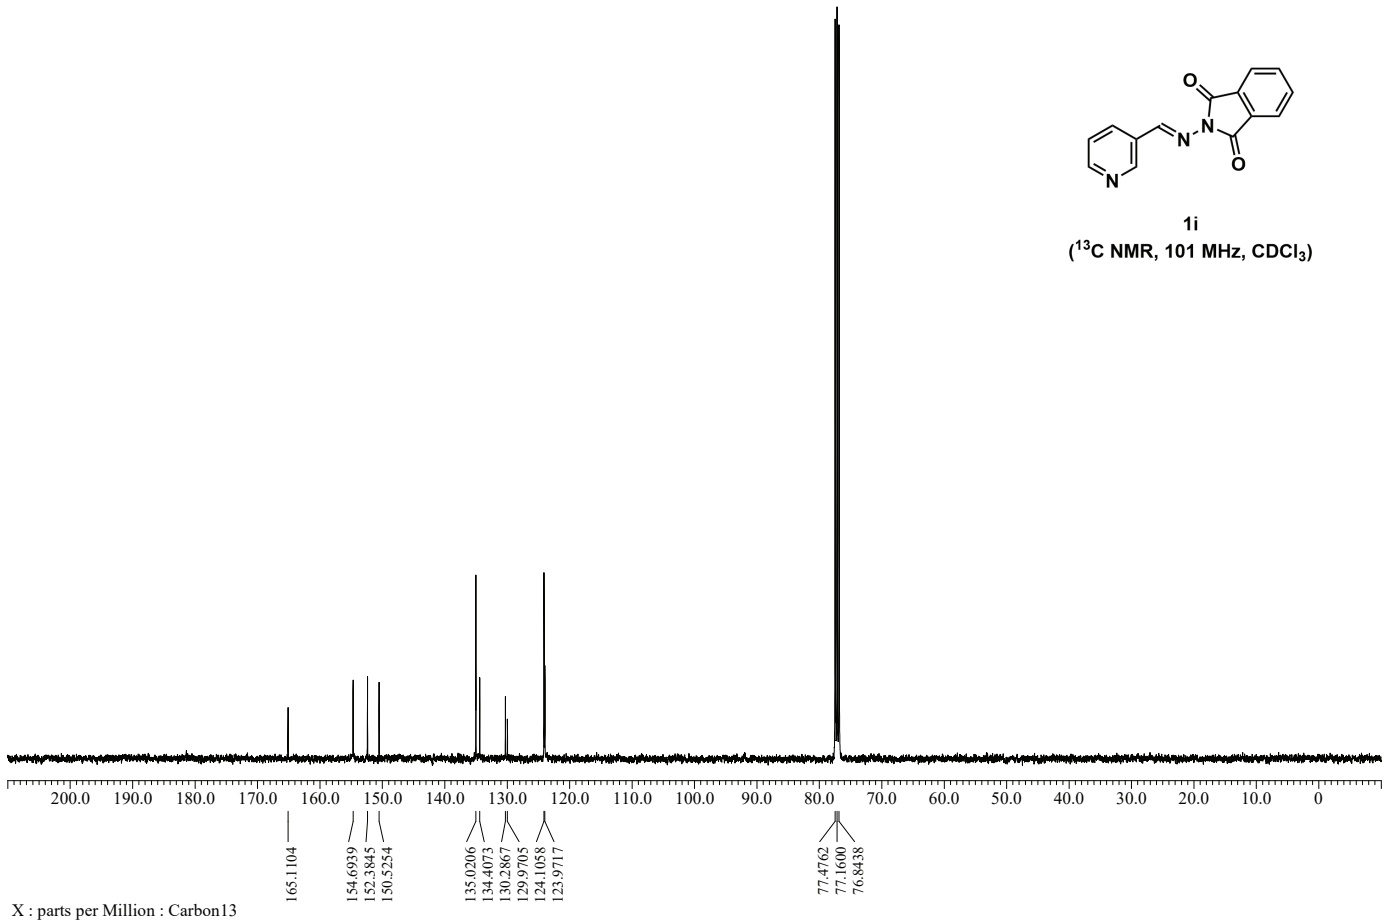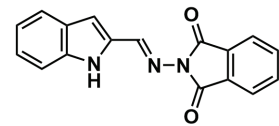

1j  
<sup>1</sup>H NMR, 400 MHz, CDCl<sub>3</sub>

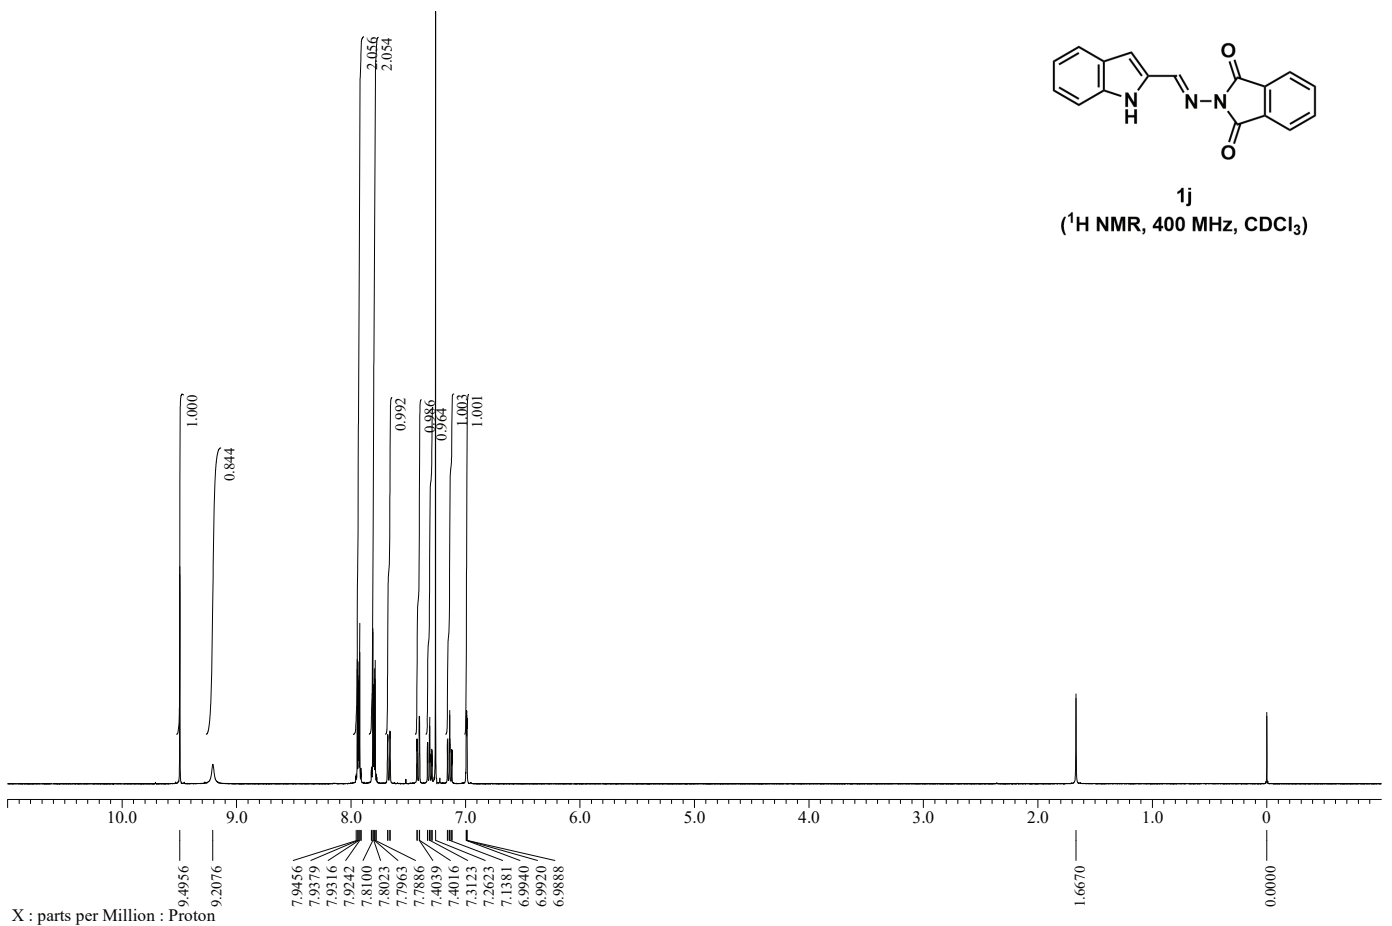



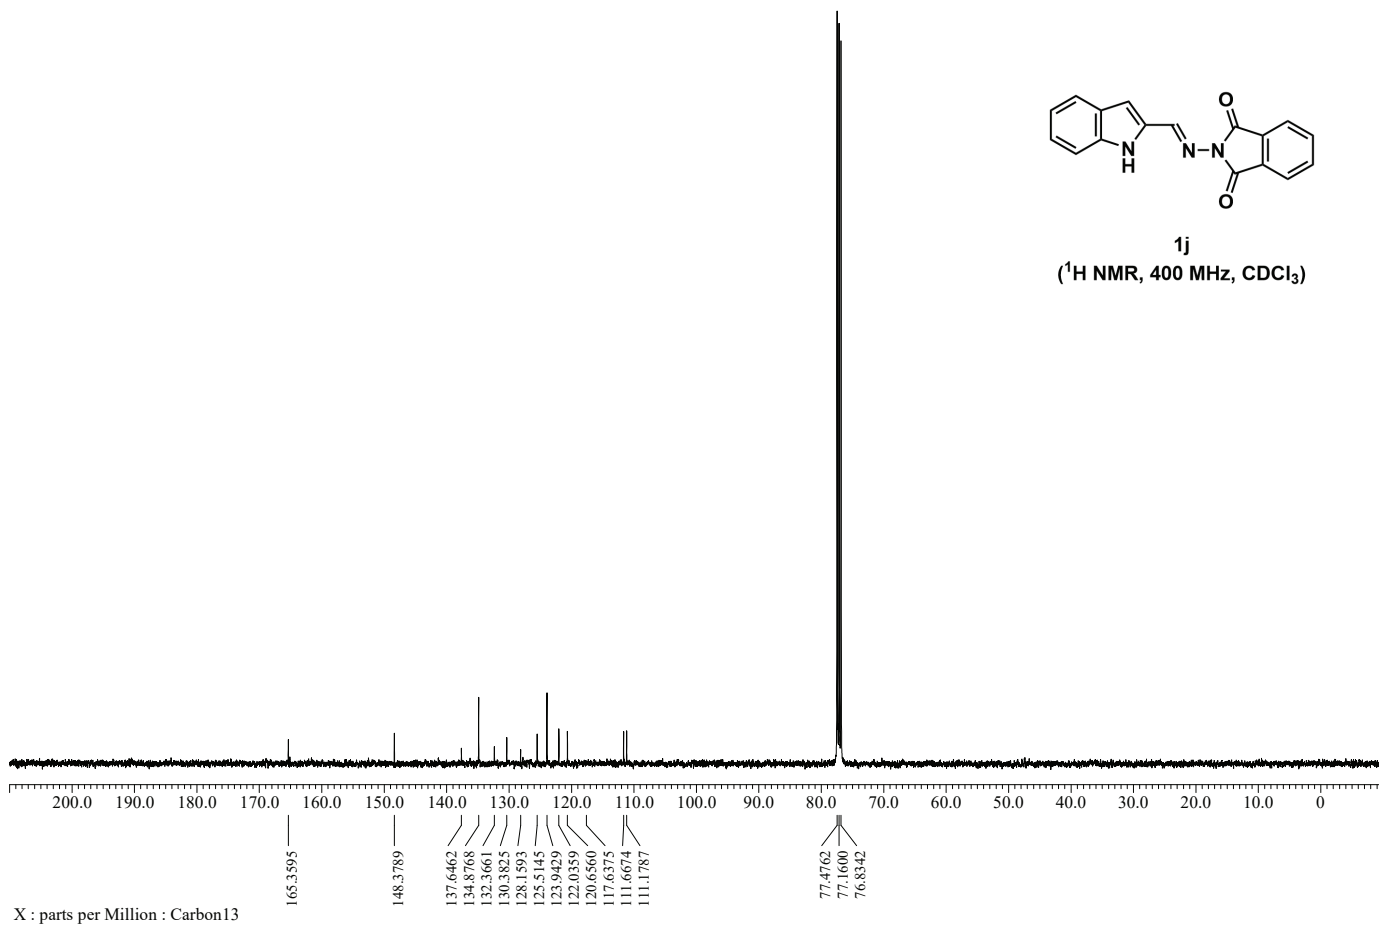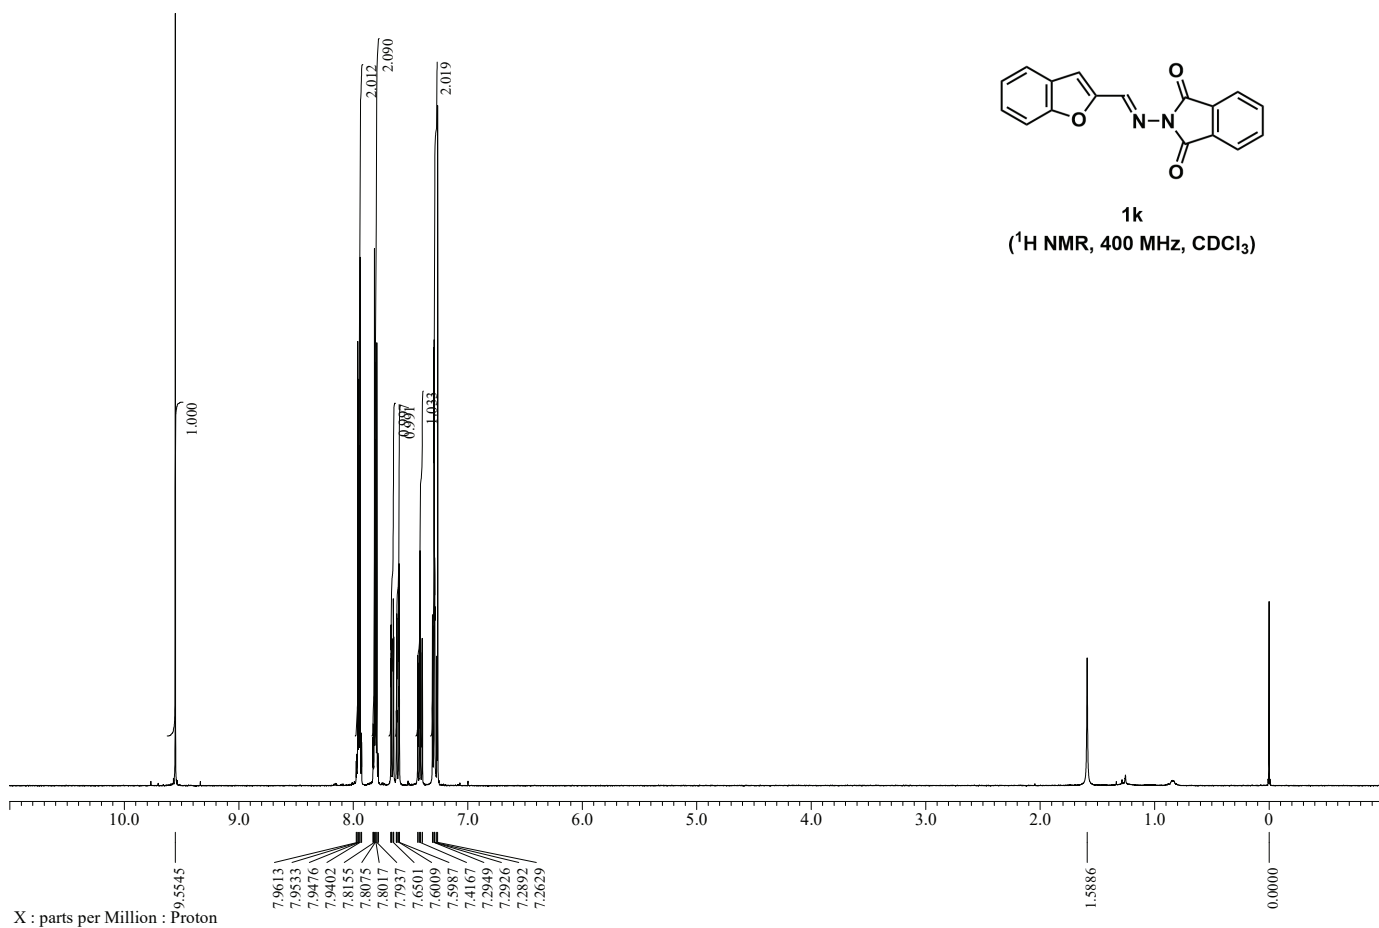

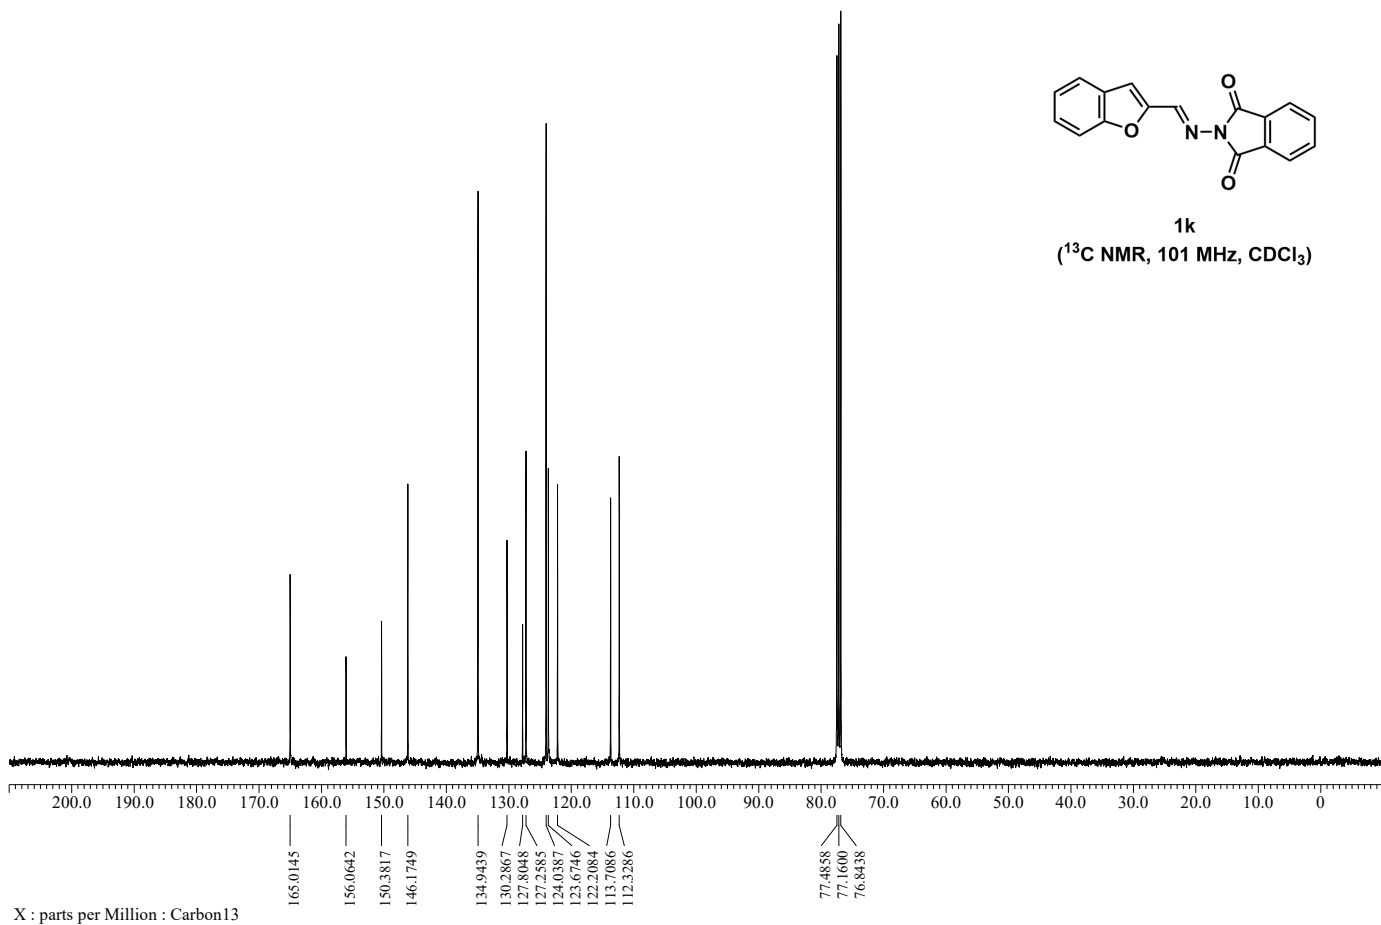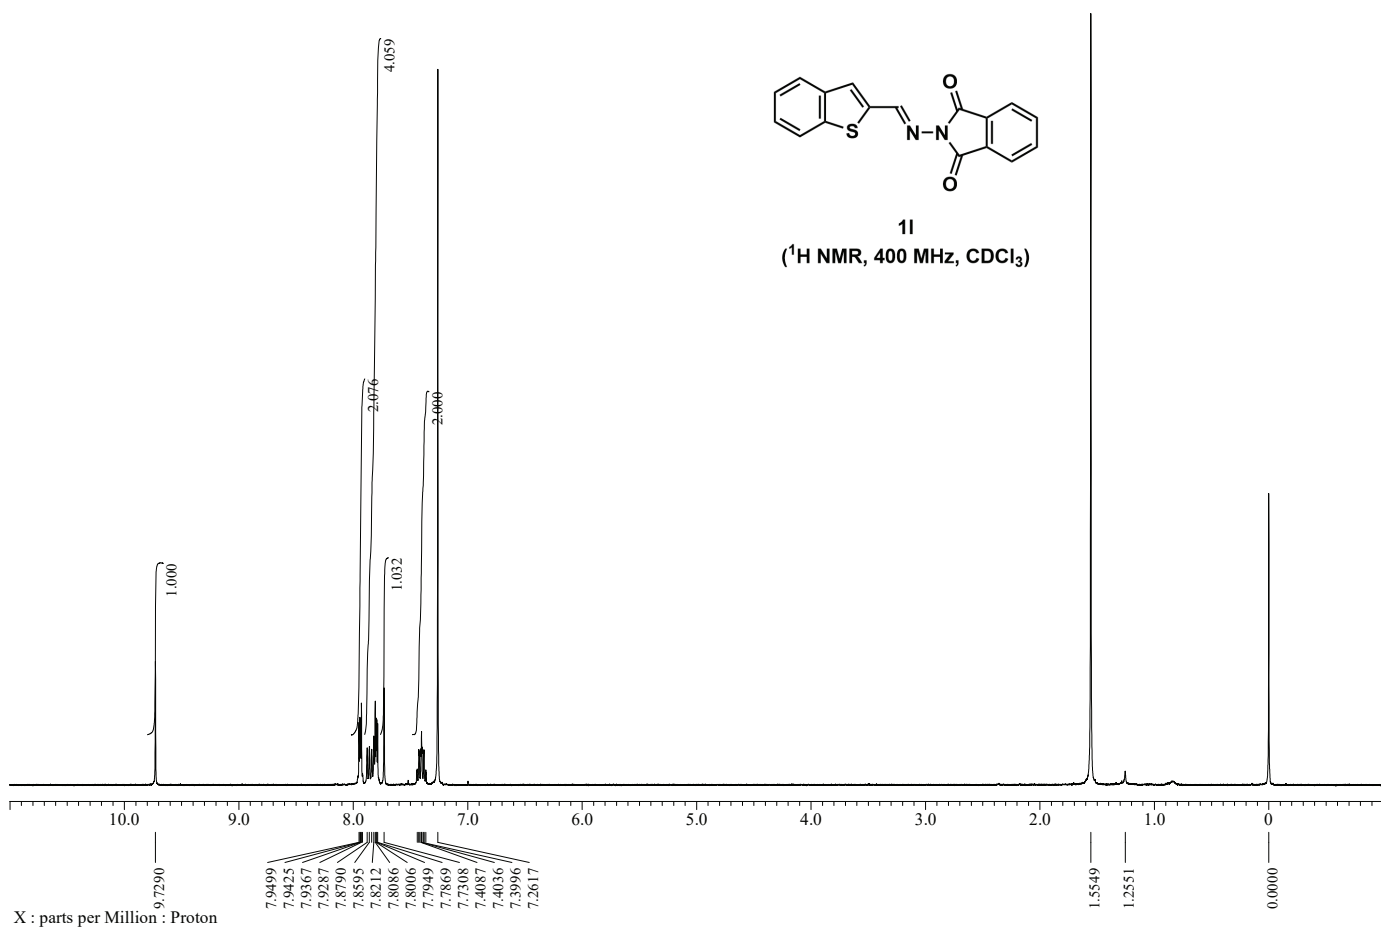

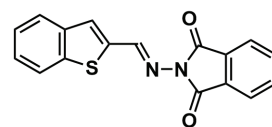

1l

(<sup>13</sup>C NMR, 101 MHz, CDCl<sub>3</sub>)

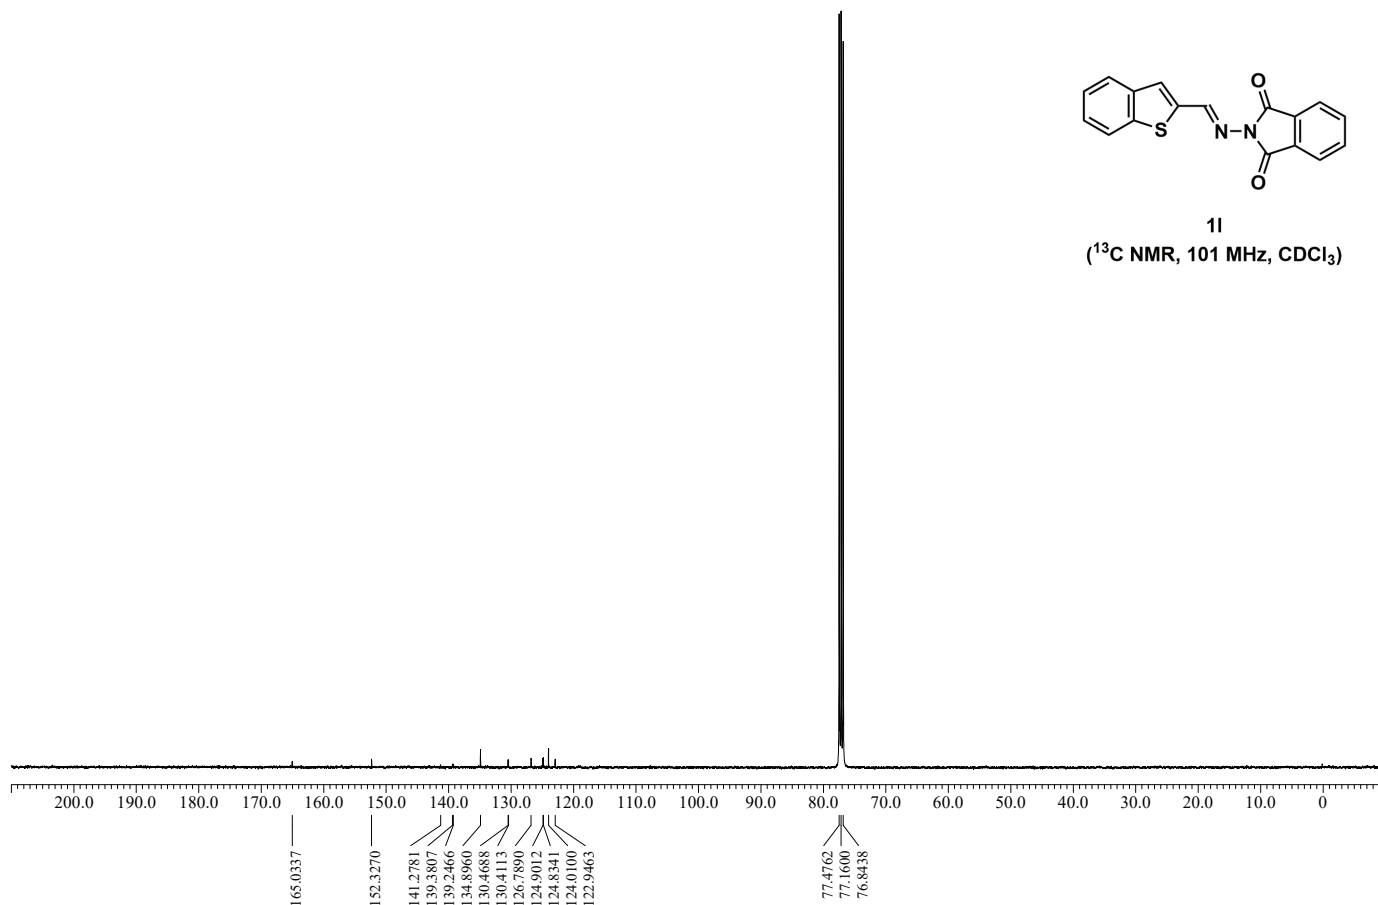

X : parts per Million : Carbon13

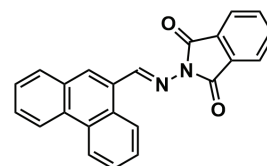

1m

(<sup>1</sup>H NMR, 400 MHz, CDCl<sub>3</sub>)

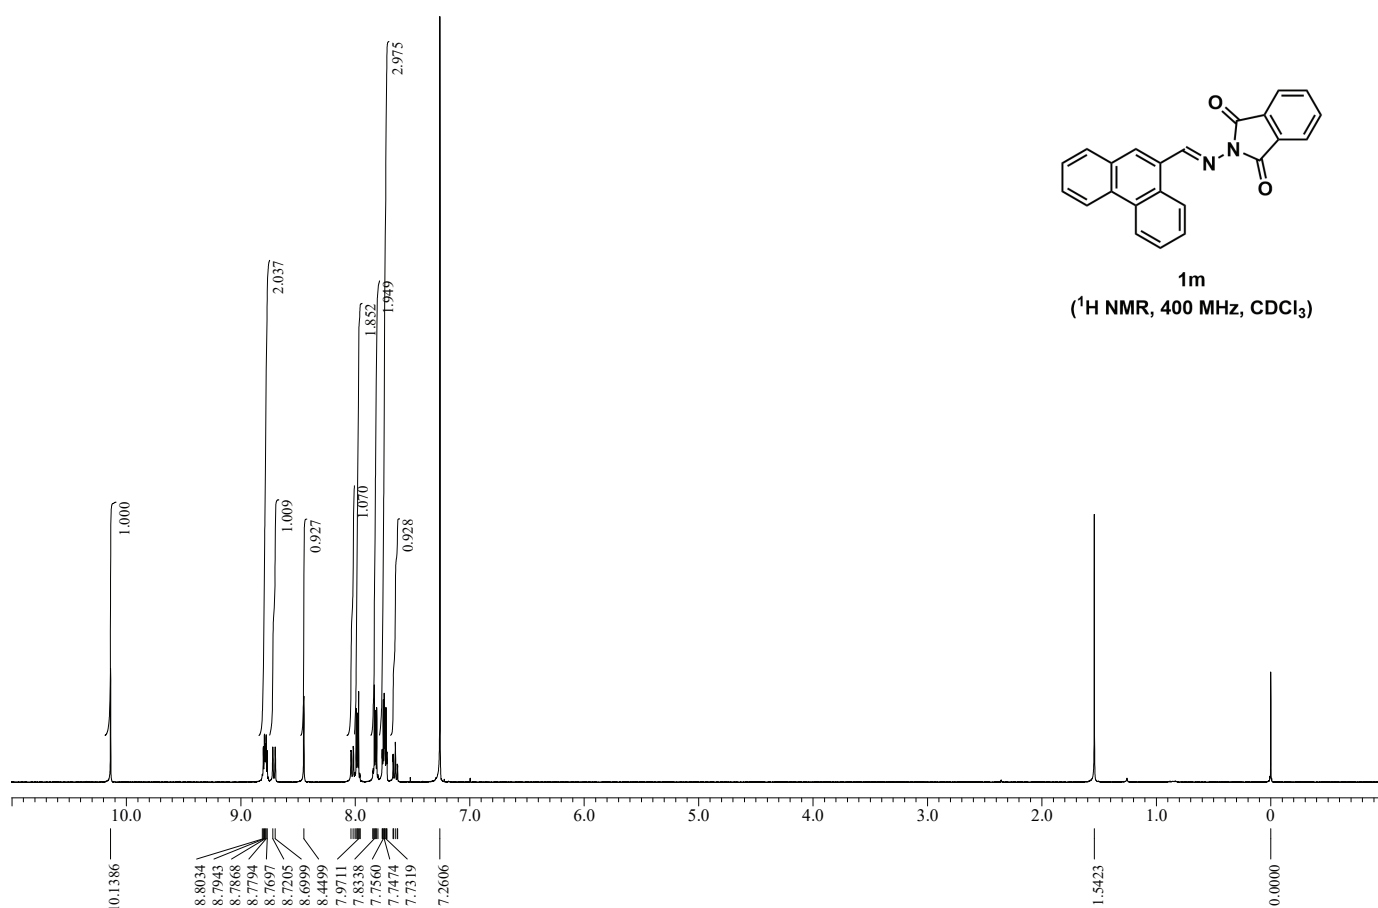

X : parts per Million : Proton

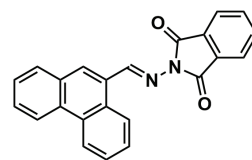

**1m**  
<sup>13</sup>C NMR, 101 MHz, CDCl<sub>3</sub>

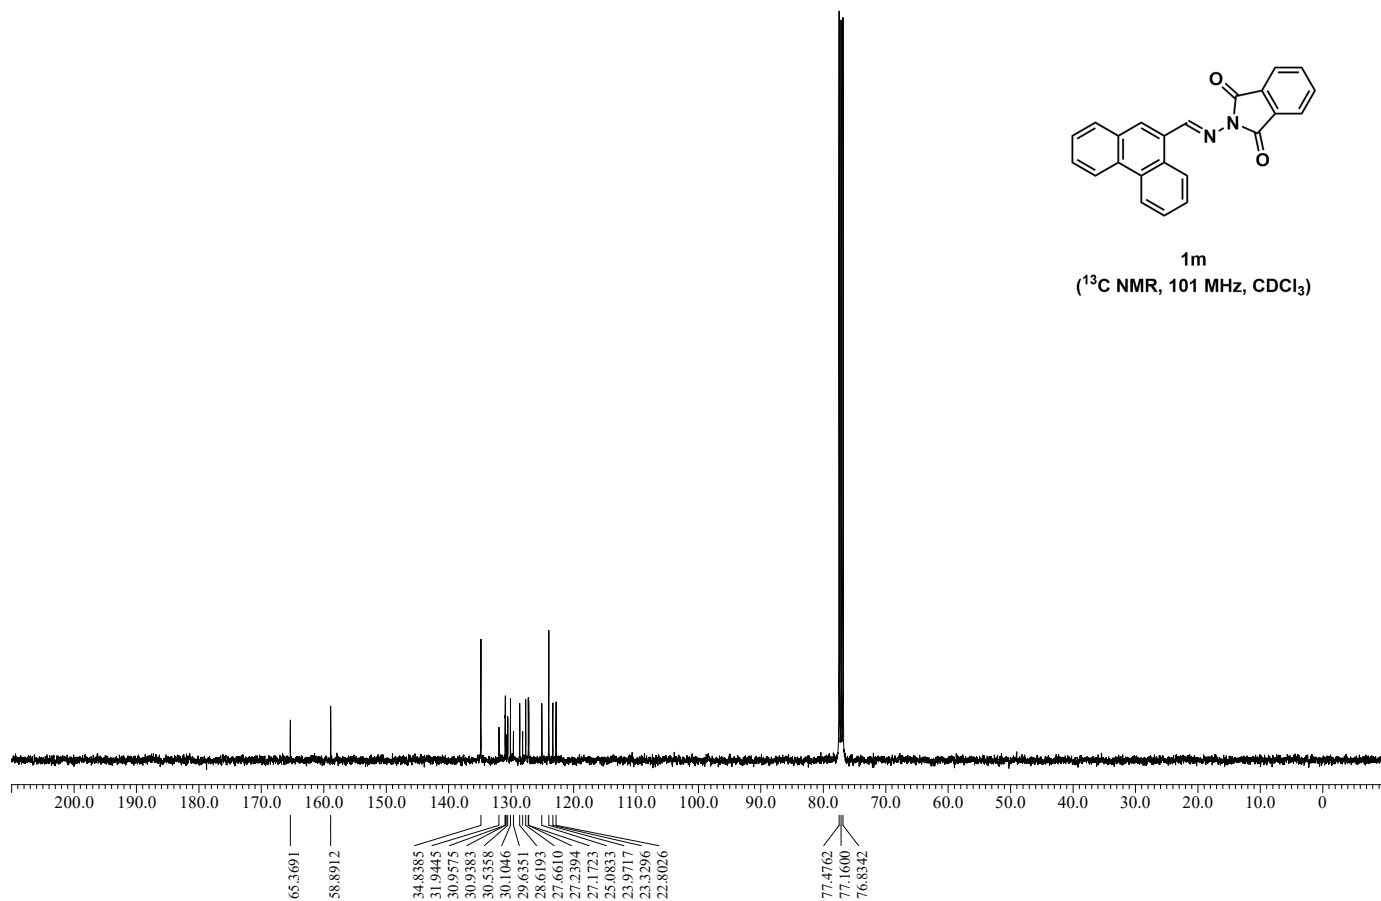

X : parts per Million : Carbon13

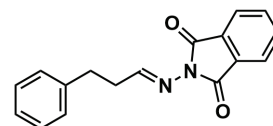

**1n**  
<sup>1</sup>H NMR, 400 MHz, CDCl<sub>3</sub>

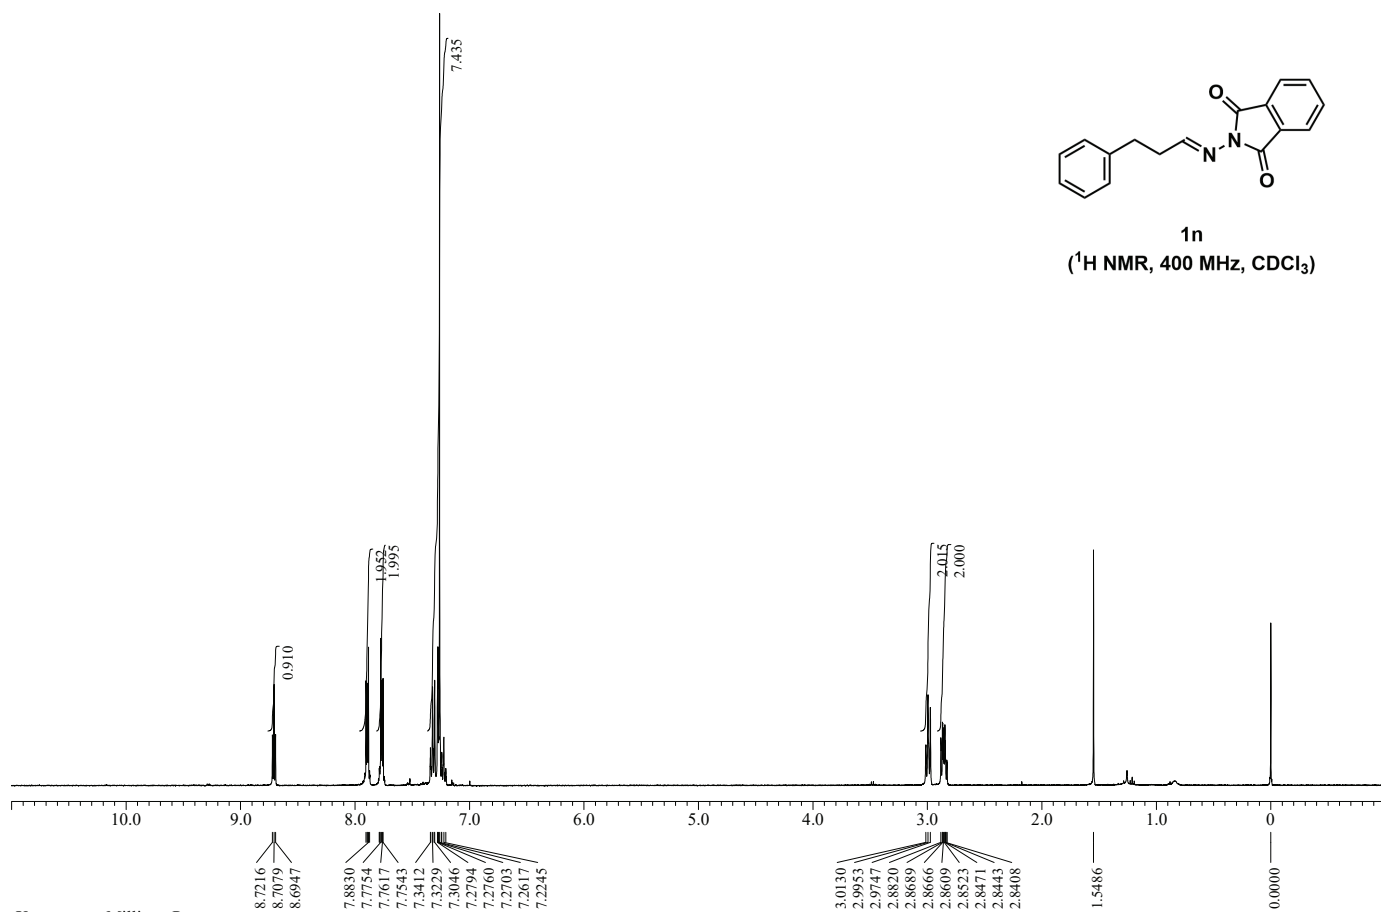

X : parts per Million : Proton

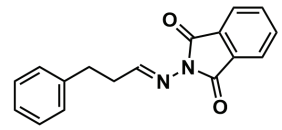

**1n**  
(<sup>13</sup>C NMR, 101 MHz, CDCl<sub>3</sub>)

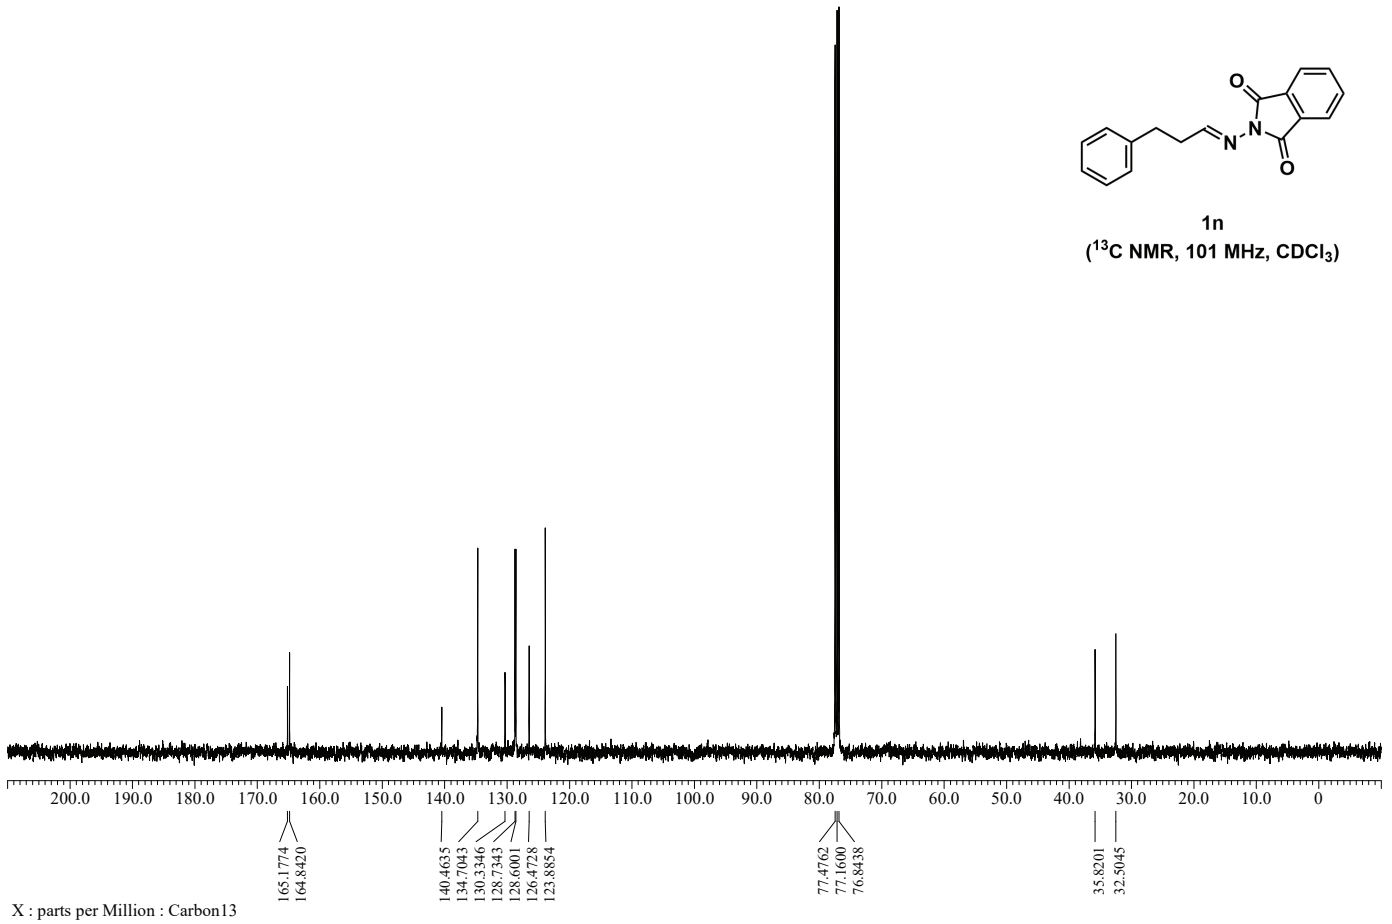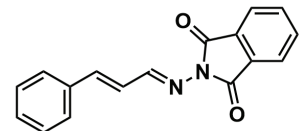

**1o**  
(<sup>1</sup>H NMR, 400 MHz, CDCl<sub>3</sub>)

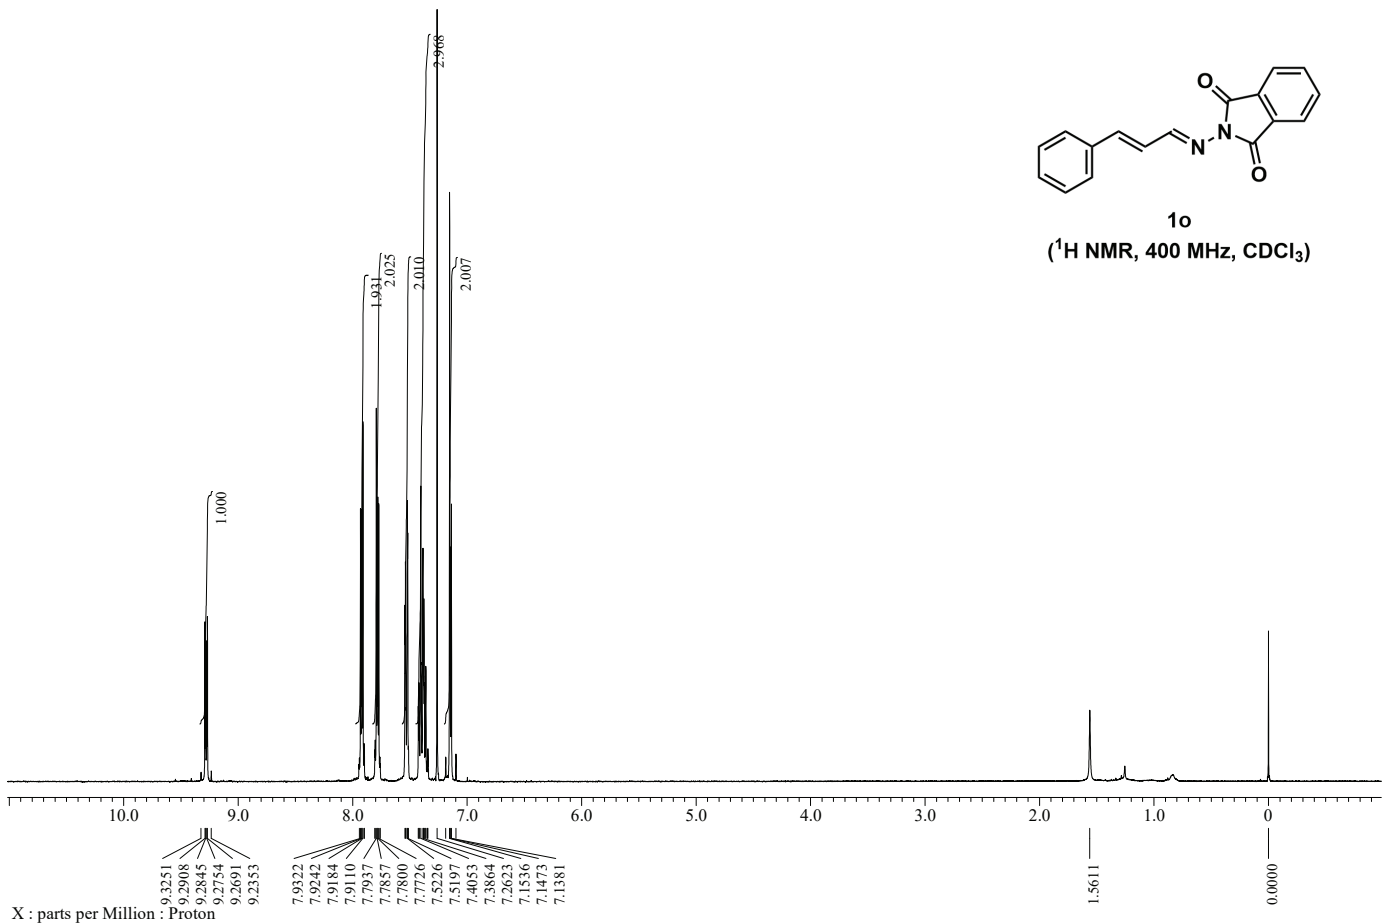

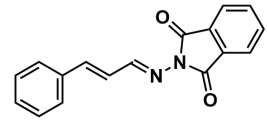

**1o**  
 (<sup>13</sup>C NMR, 101 MHz, CDCl<sub>3</sub>)

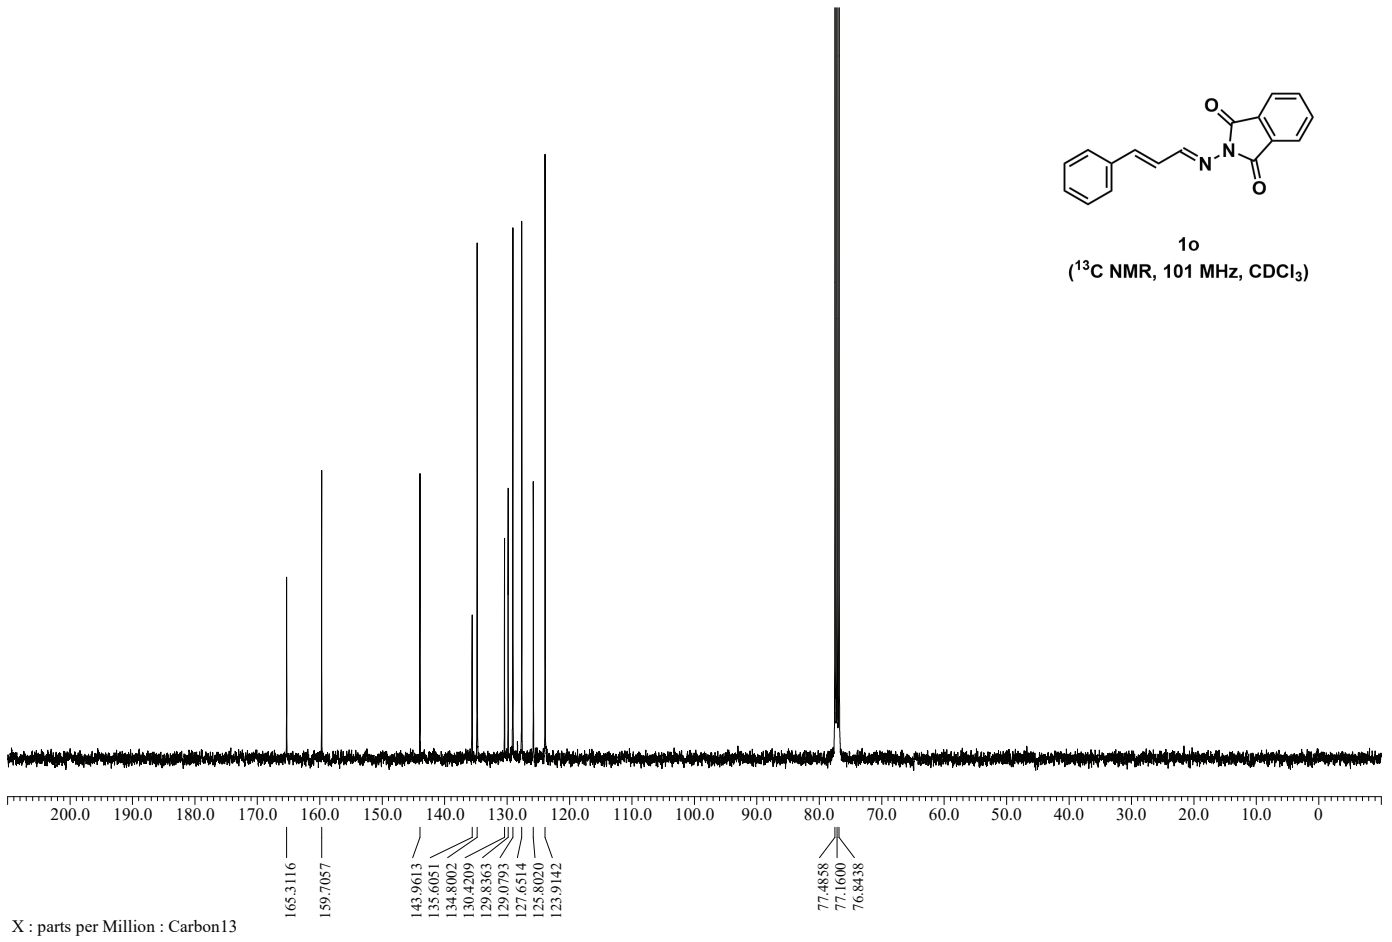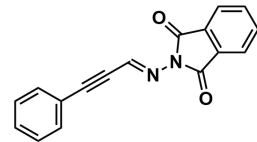

**1p**  
 (<sup>1</sup>H NMR, 400 MHz, CDCl<sub>3</sub>)

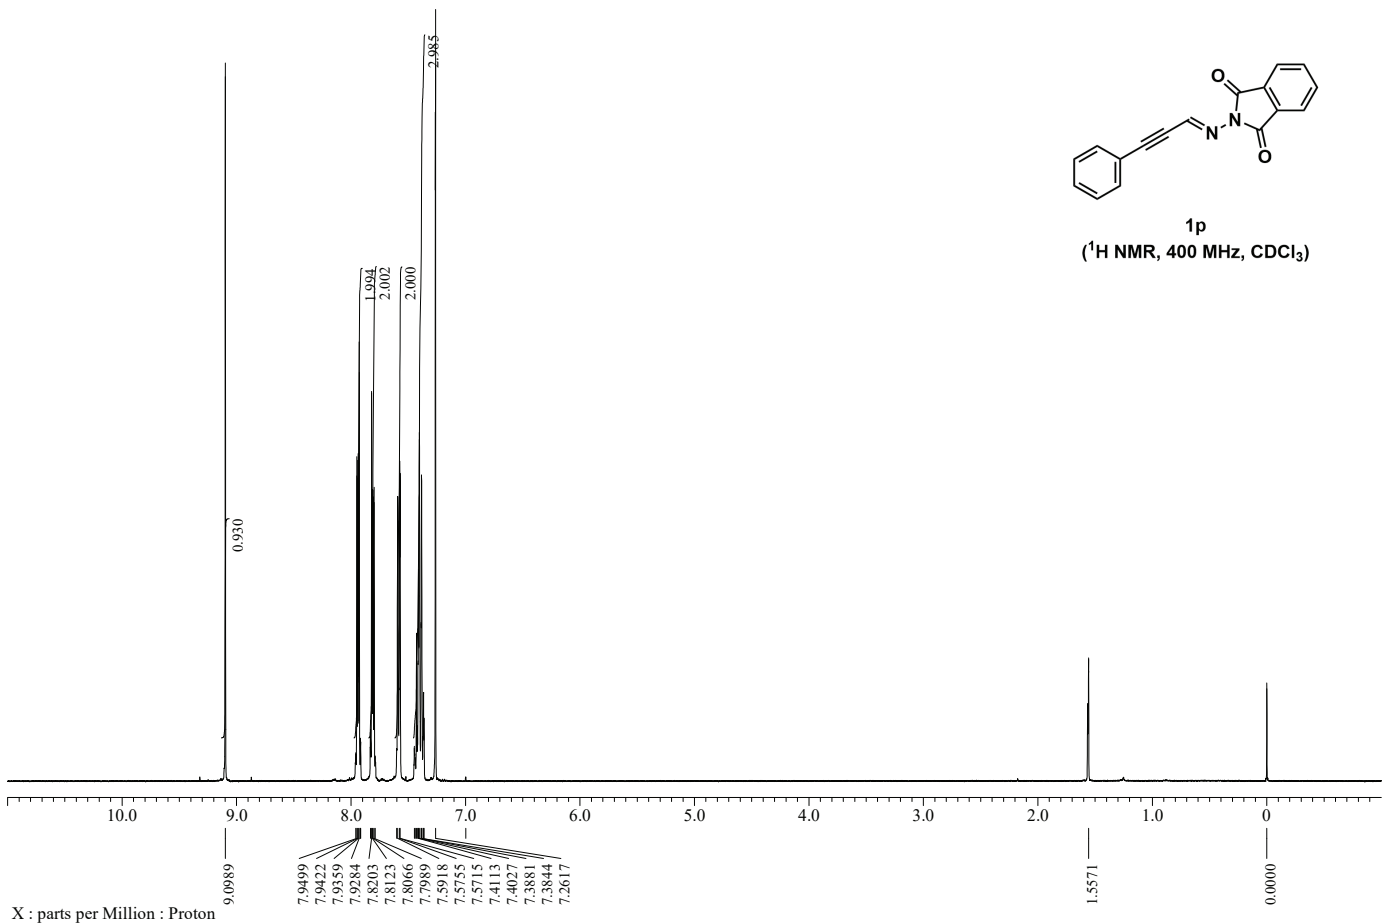

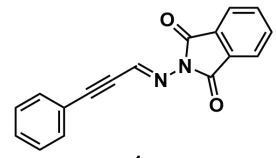

**1p**  
 (<sup>13</sup>C NMR, 101 MHz, CDCl<sub>3</sub>)

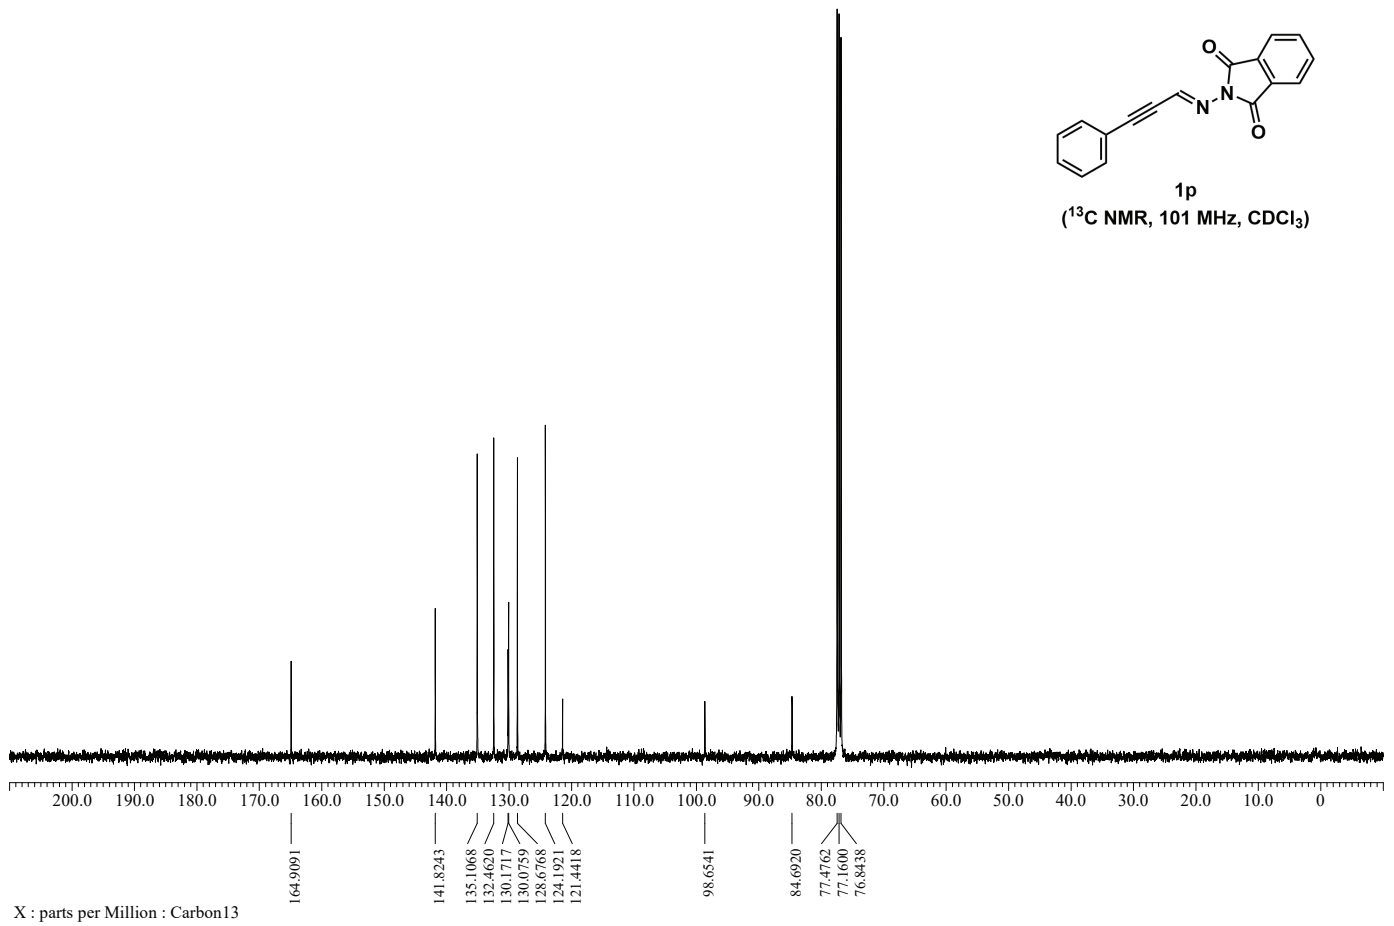

X : parts per Million : Carbon13

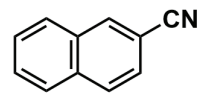

**2a**  
 (<sup>1</sup>H NMR, 400 MHz, CDCl<sub>3</sub>)

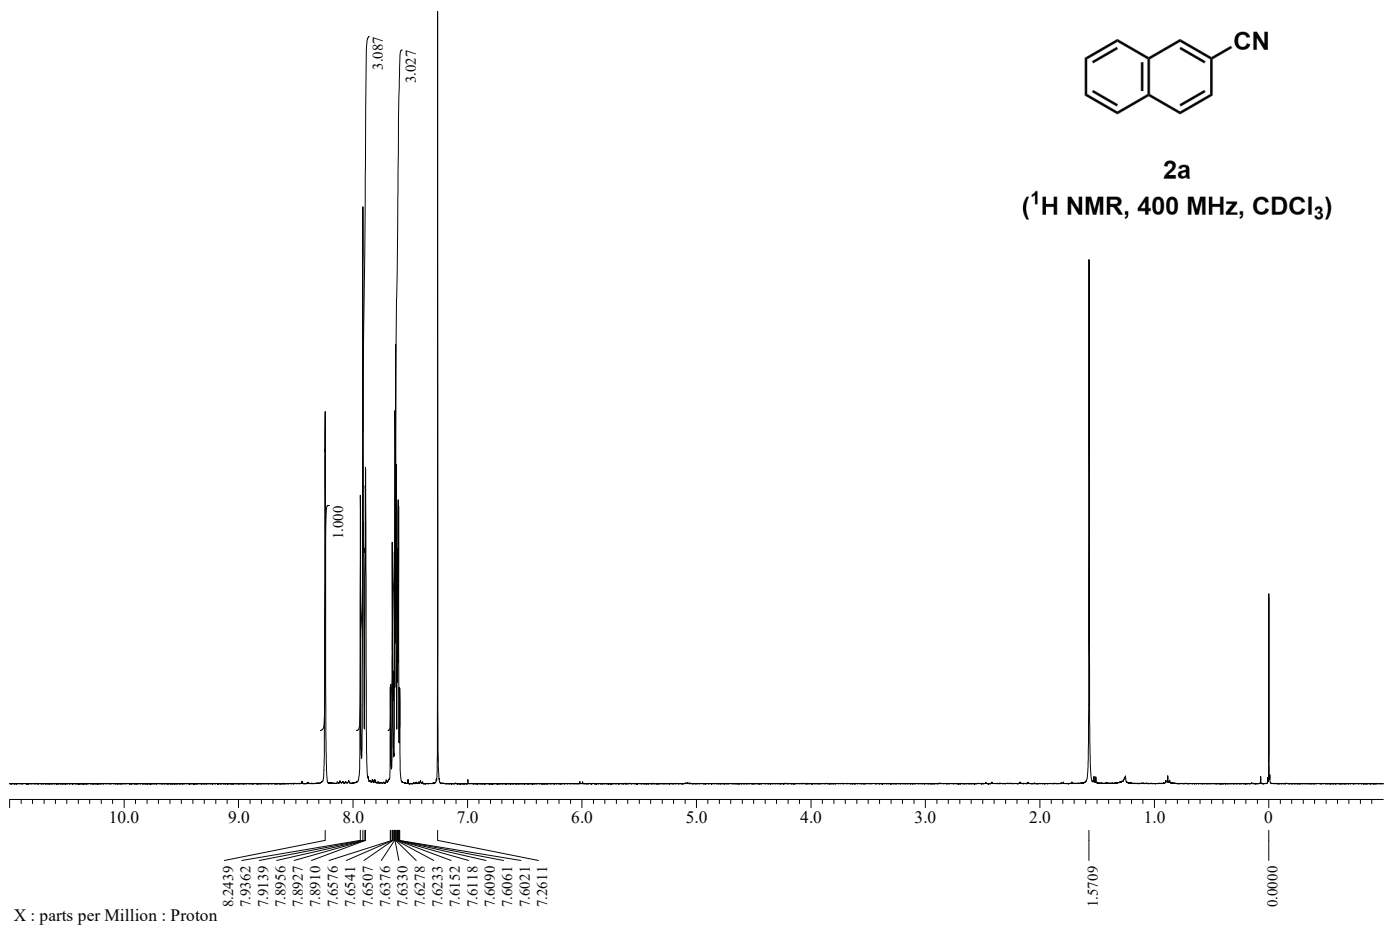

X : parts per Million : Proton

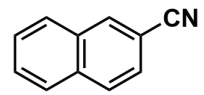

2a

(<sup>13</sup>C NMR, 101 MHz, CDCl<sub>3</sub>)

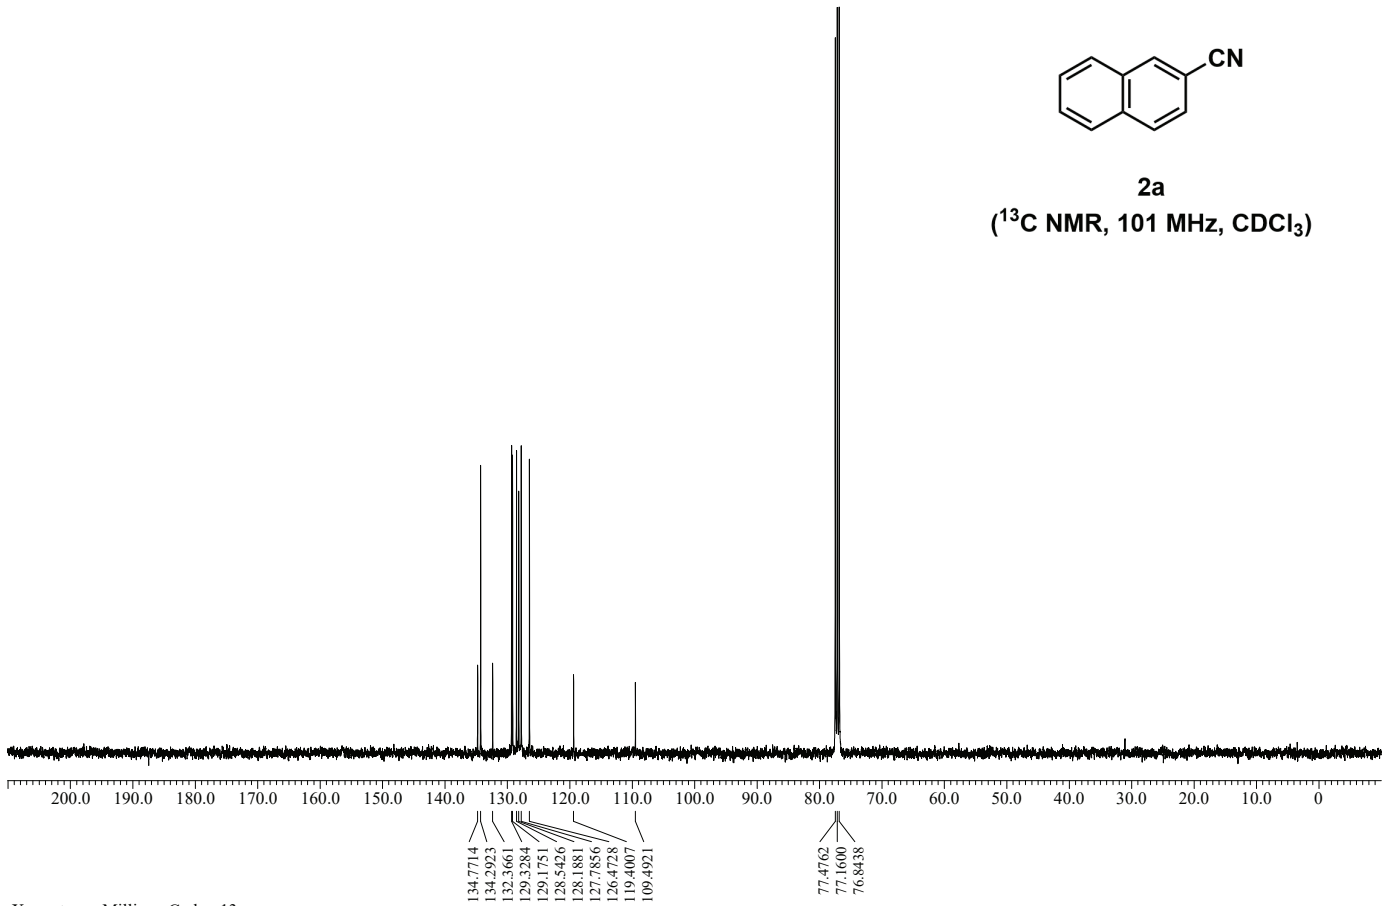

X : parts per Million : Carbon13

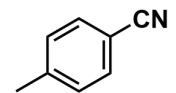

2b

(<sup>1</sup>H NMR, 400 MHz, CDCl<sub>3</sub>)

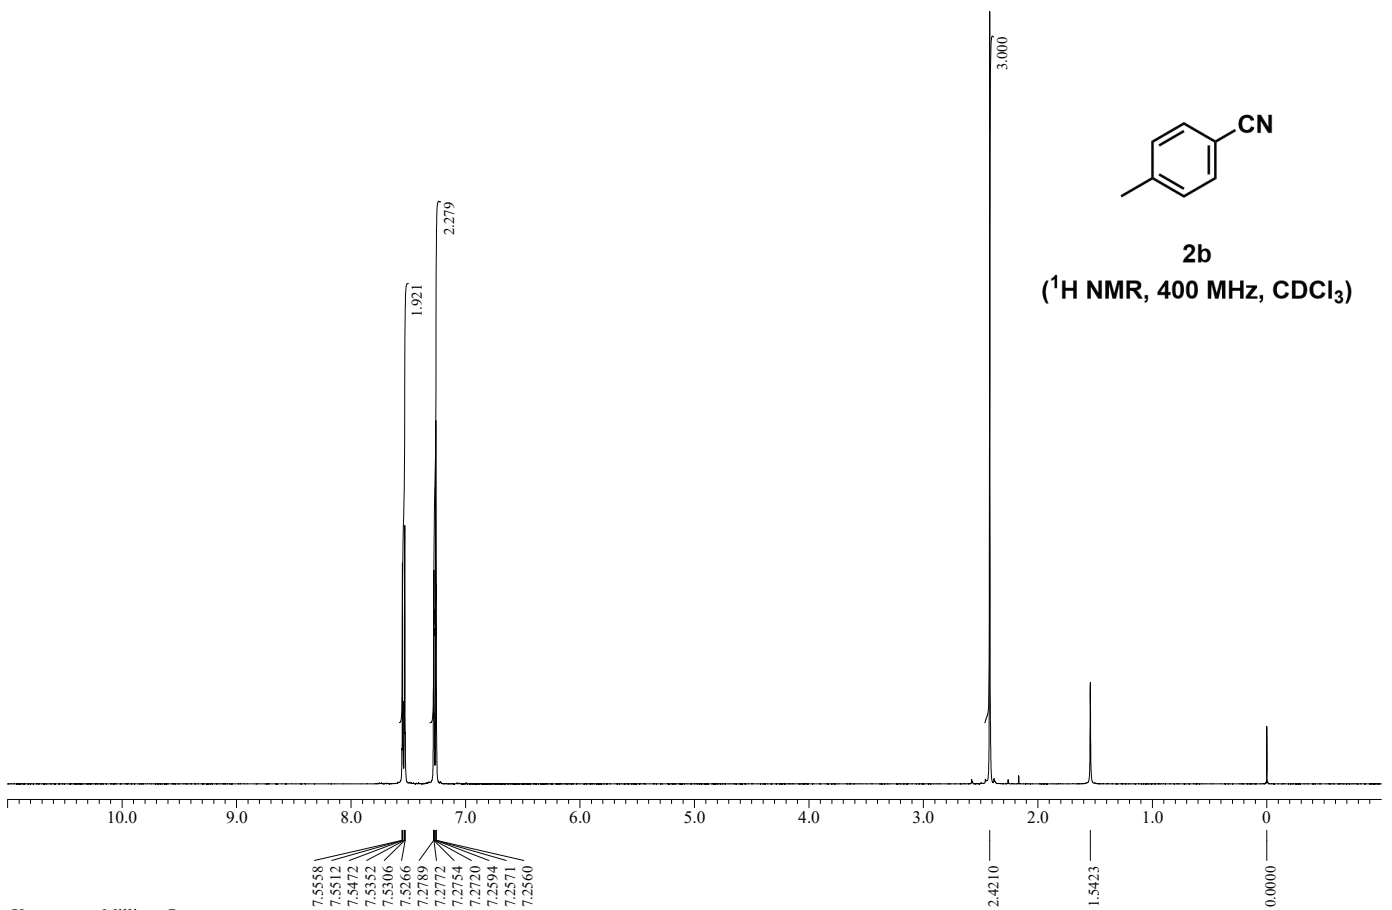

X : parts per Million : Proton



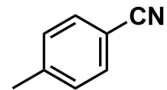

2b

(<sup>13</sup>C NMR, 101 MHz, CDCl<sub>3</sub>)

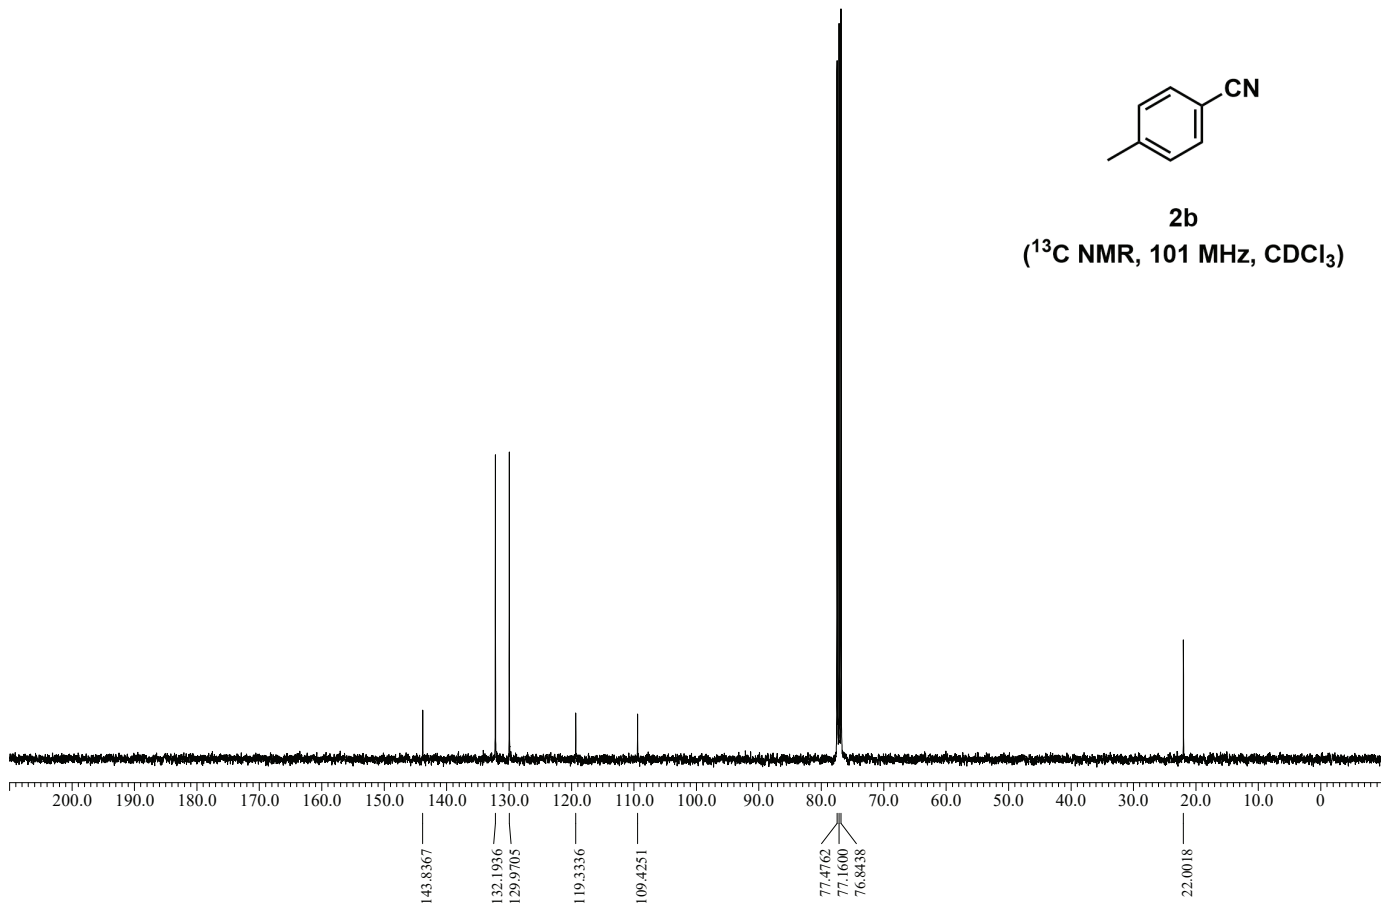

X : parts per Million : Carbon13

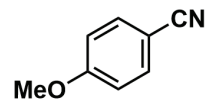

2c

(<sup>1</sup>H NMR, 400 MHz, CDCl<sub>3</sub>)

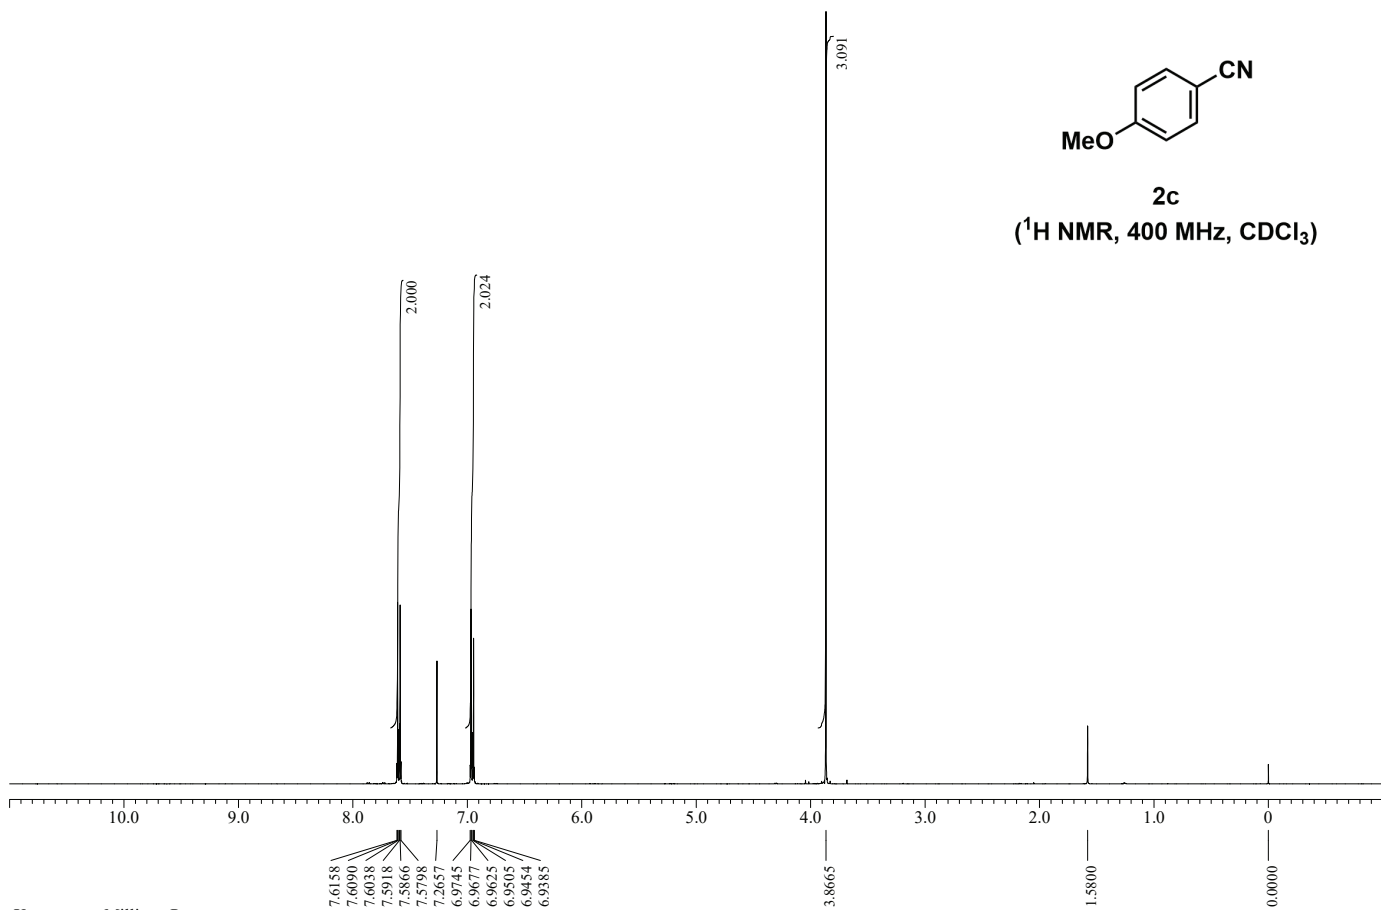

X : parts per Million : Proton

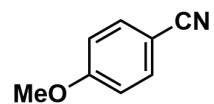

2c

(<sup>13</sup>C NMR, 101 MHz, CDCl<sub>3</sub>)

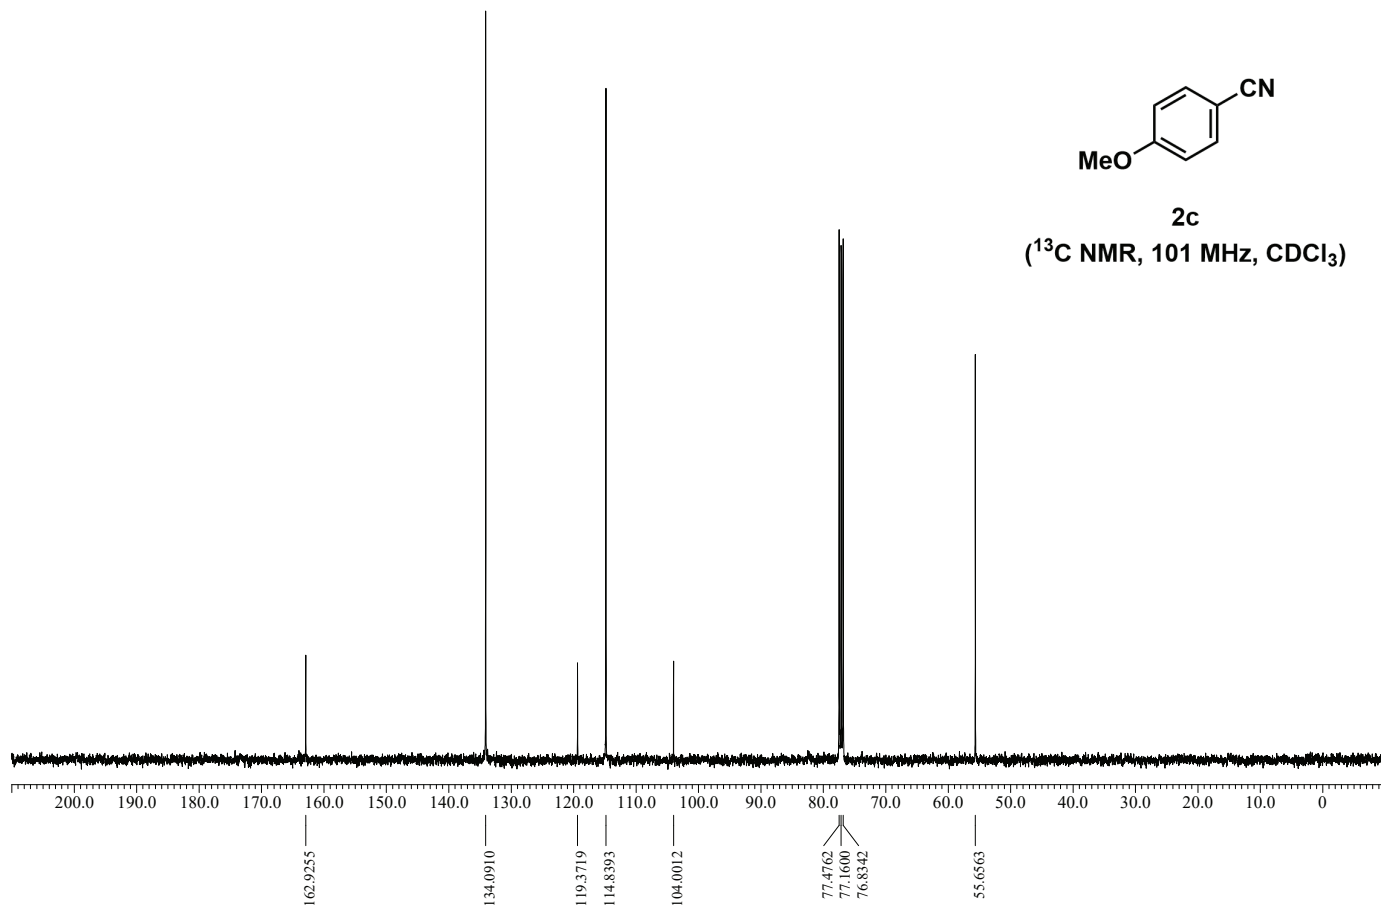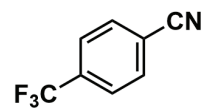

2d

(<sup>1</sup>H NMR, 400 MHz, CDCl<sub>3</sub>)

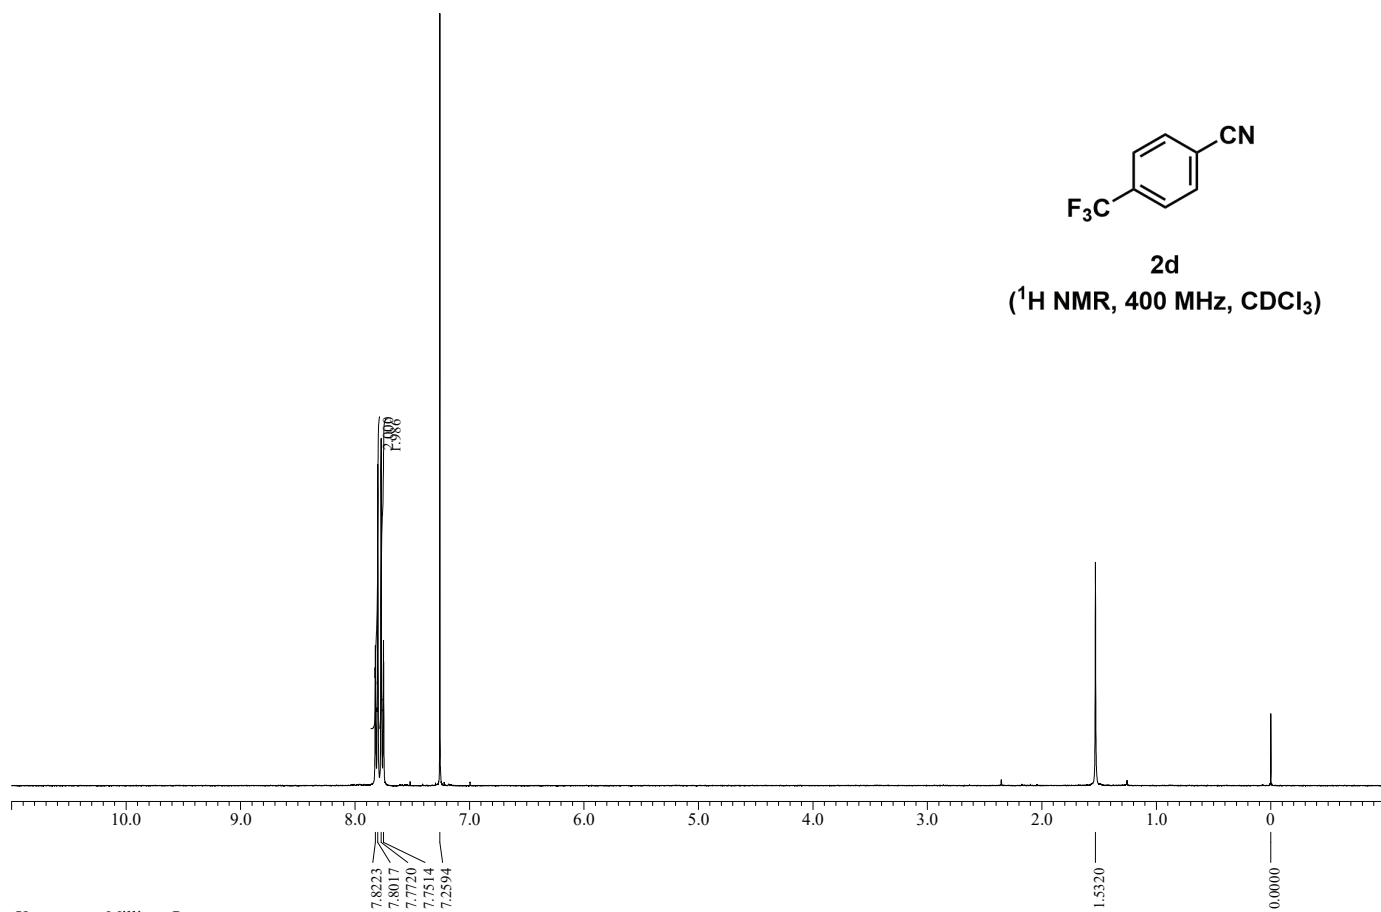

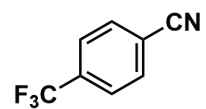

2d

(<sup>13</sup>C NMR, 101 MHz, CDCl<sub>3</sub>)

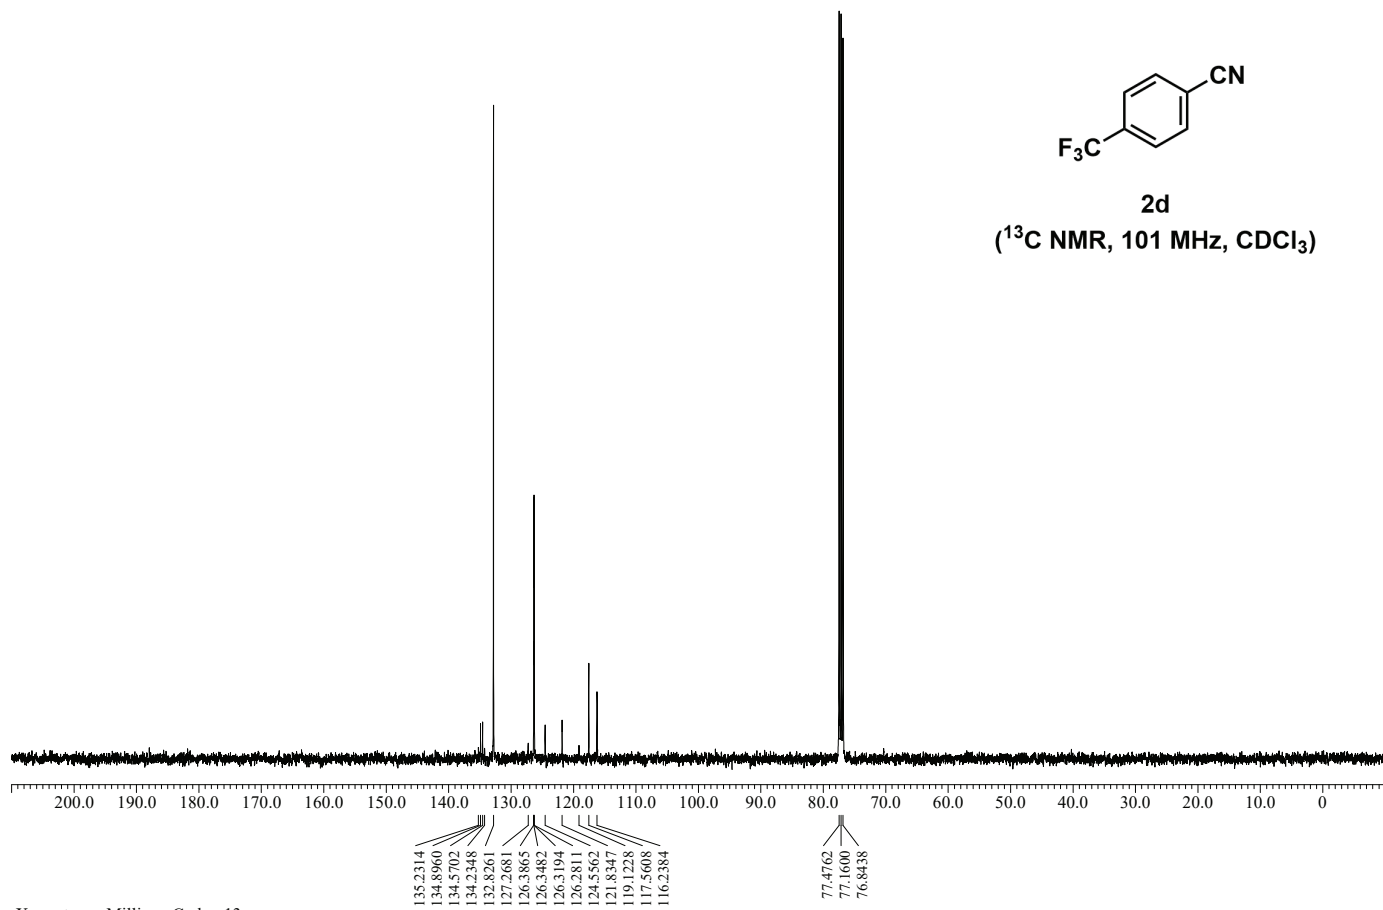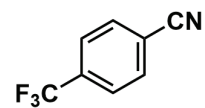

2d

(<sup>19</sup>F NMR, 376 MHz, CDCl<sub>3</sub>)

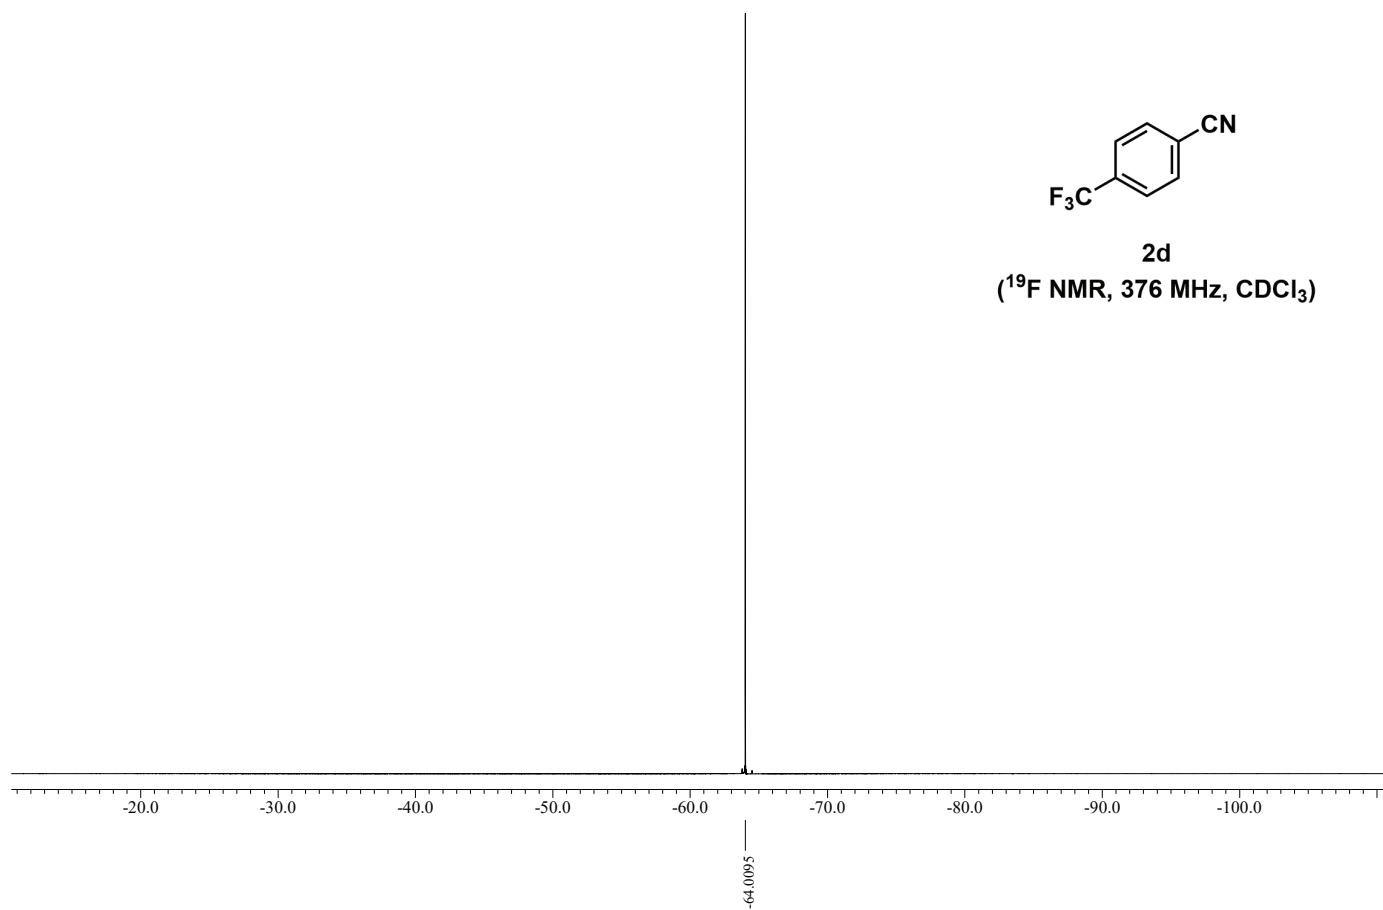

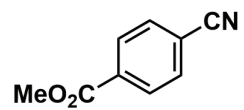

2e

(<sup>1</sup>H NMR, 400 MHz, CDCl<sub>3</sub>)

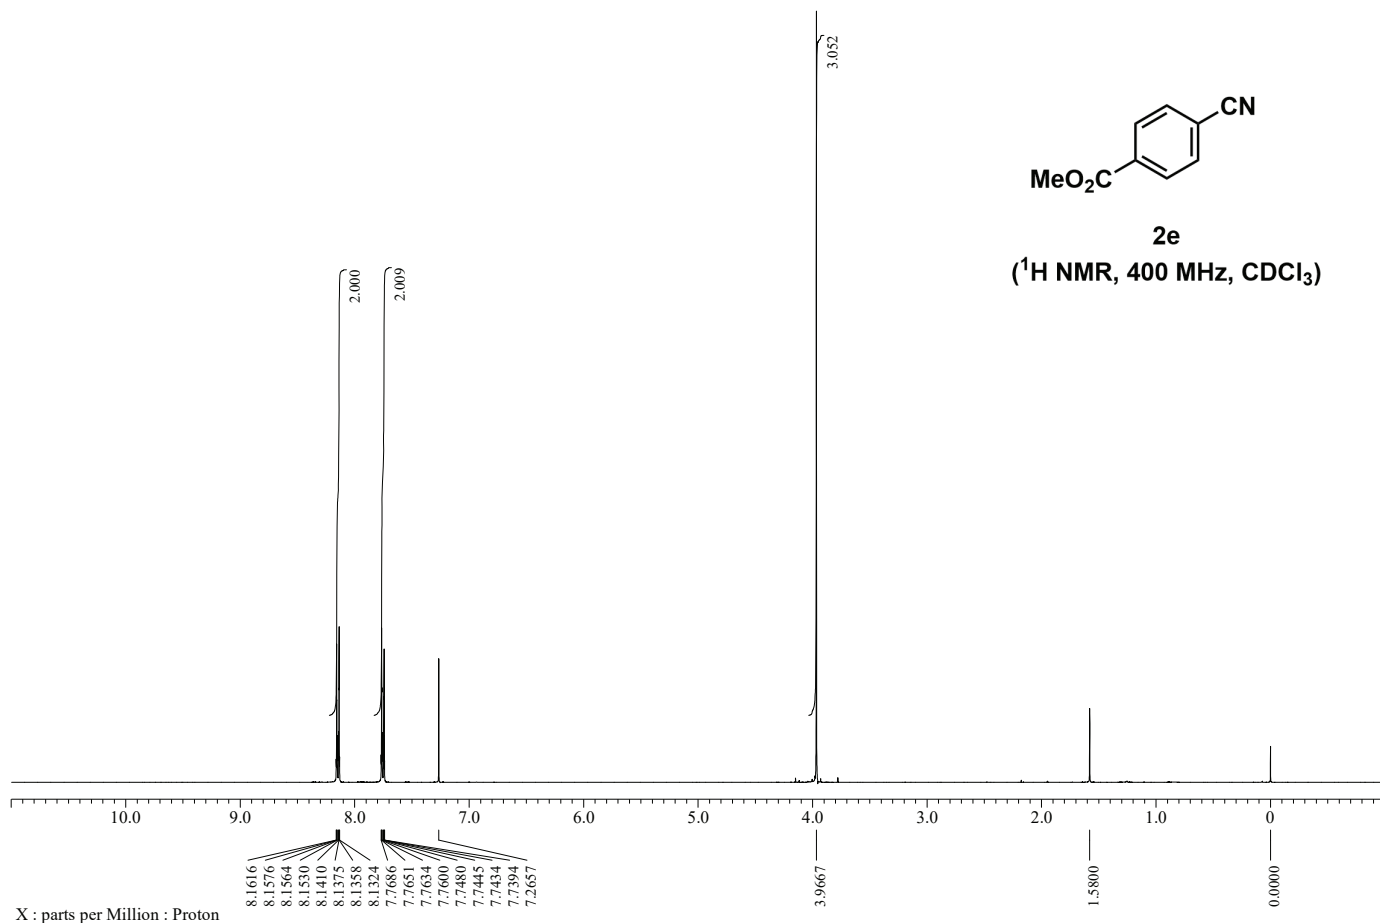

X : parts per Million : Proton

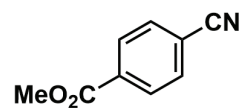

2e

(<sup>13</sup>C NMR, 101 MHz, CDCl<sub>3</sub>)

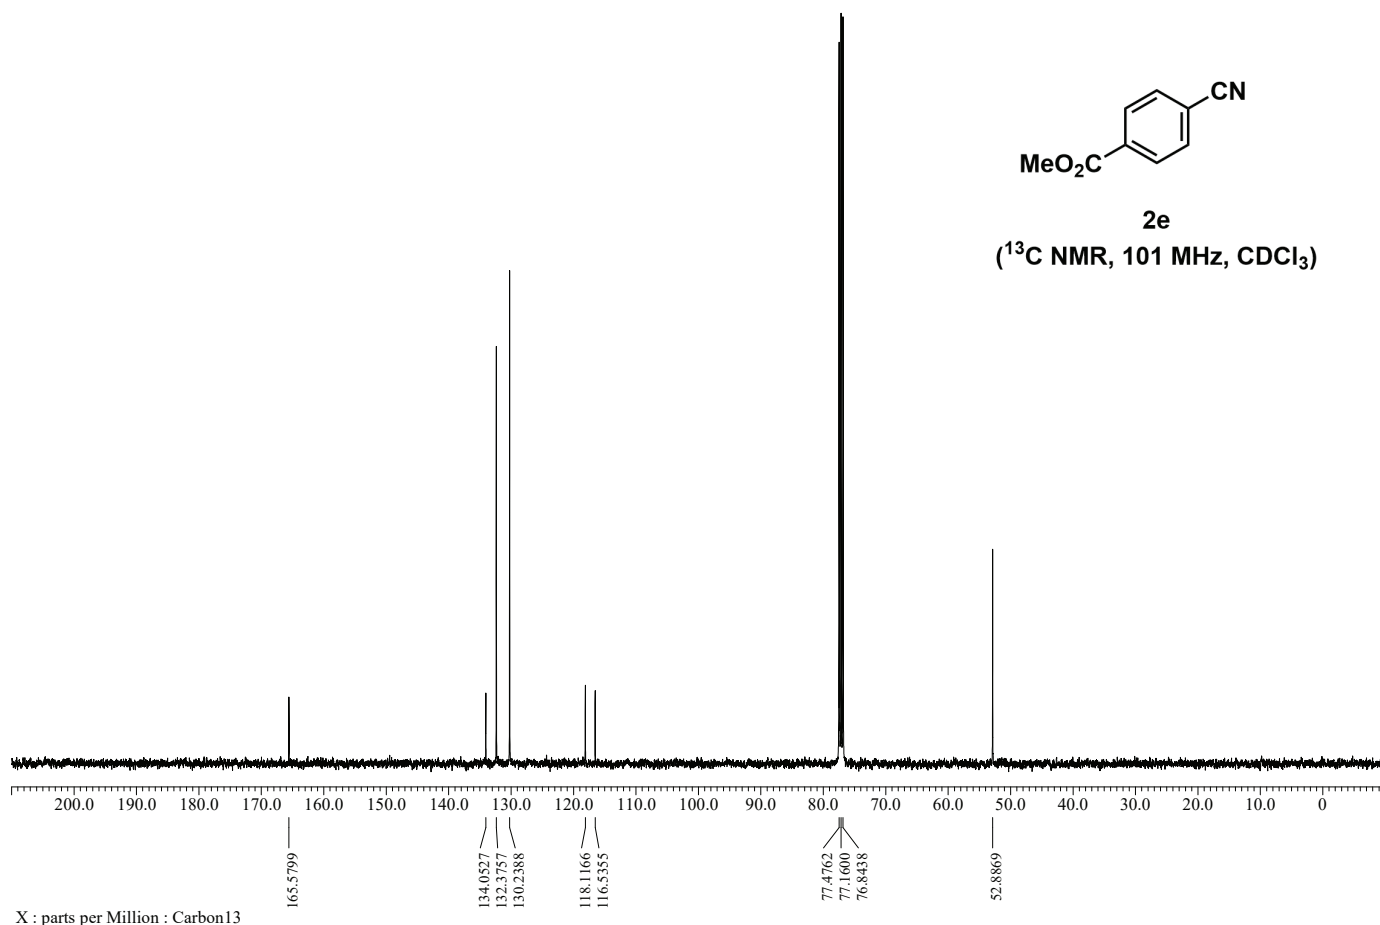

X : parts per Million : Carbon13

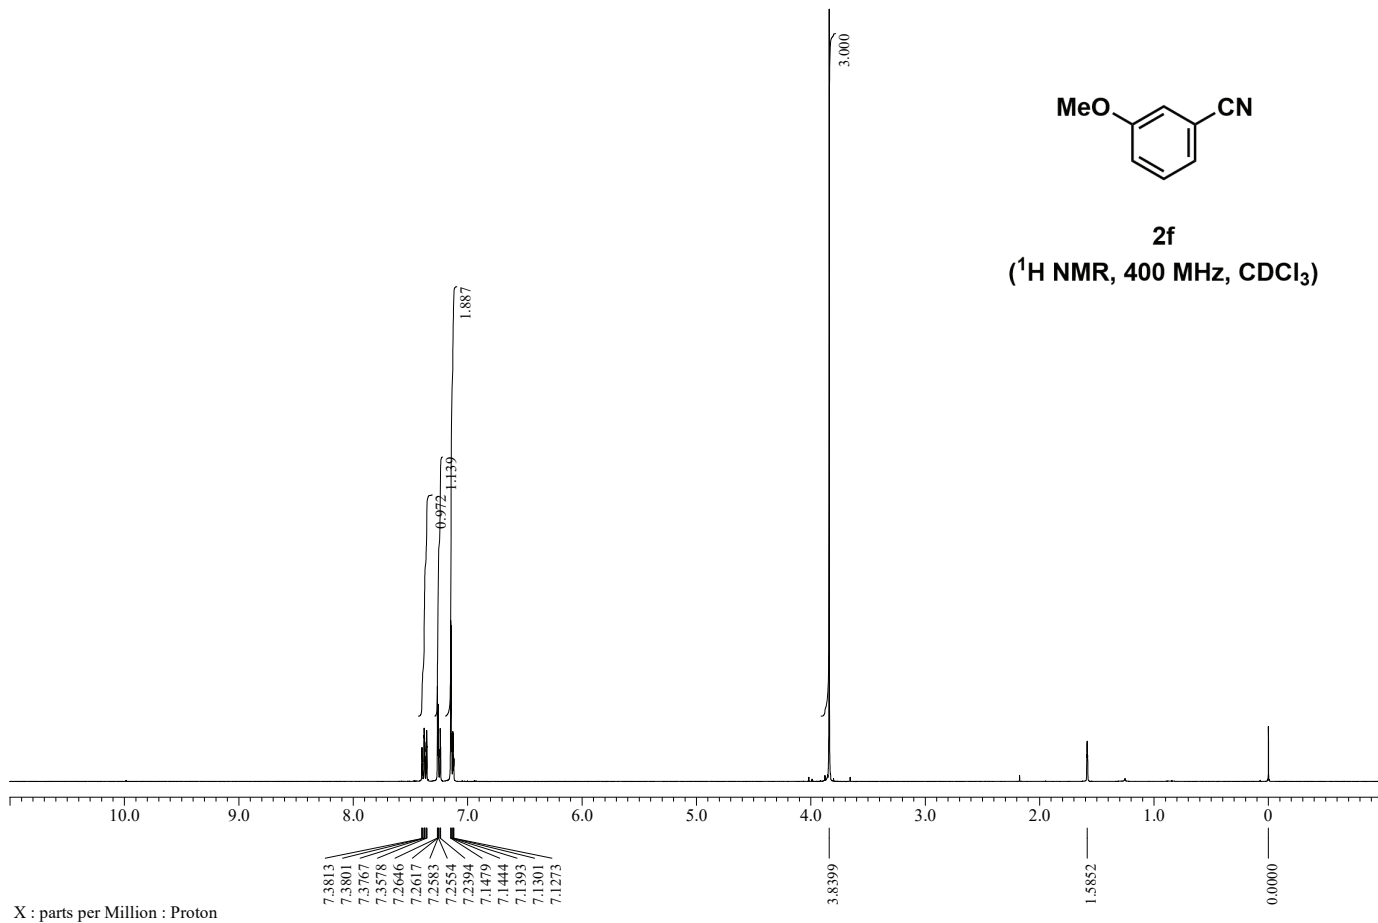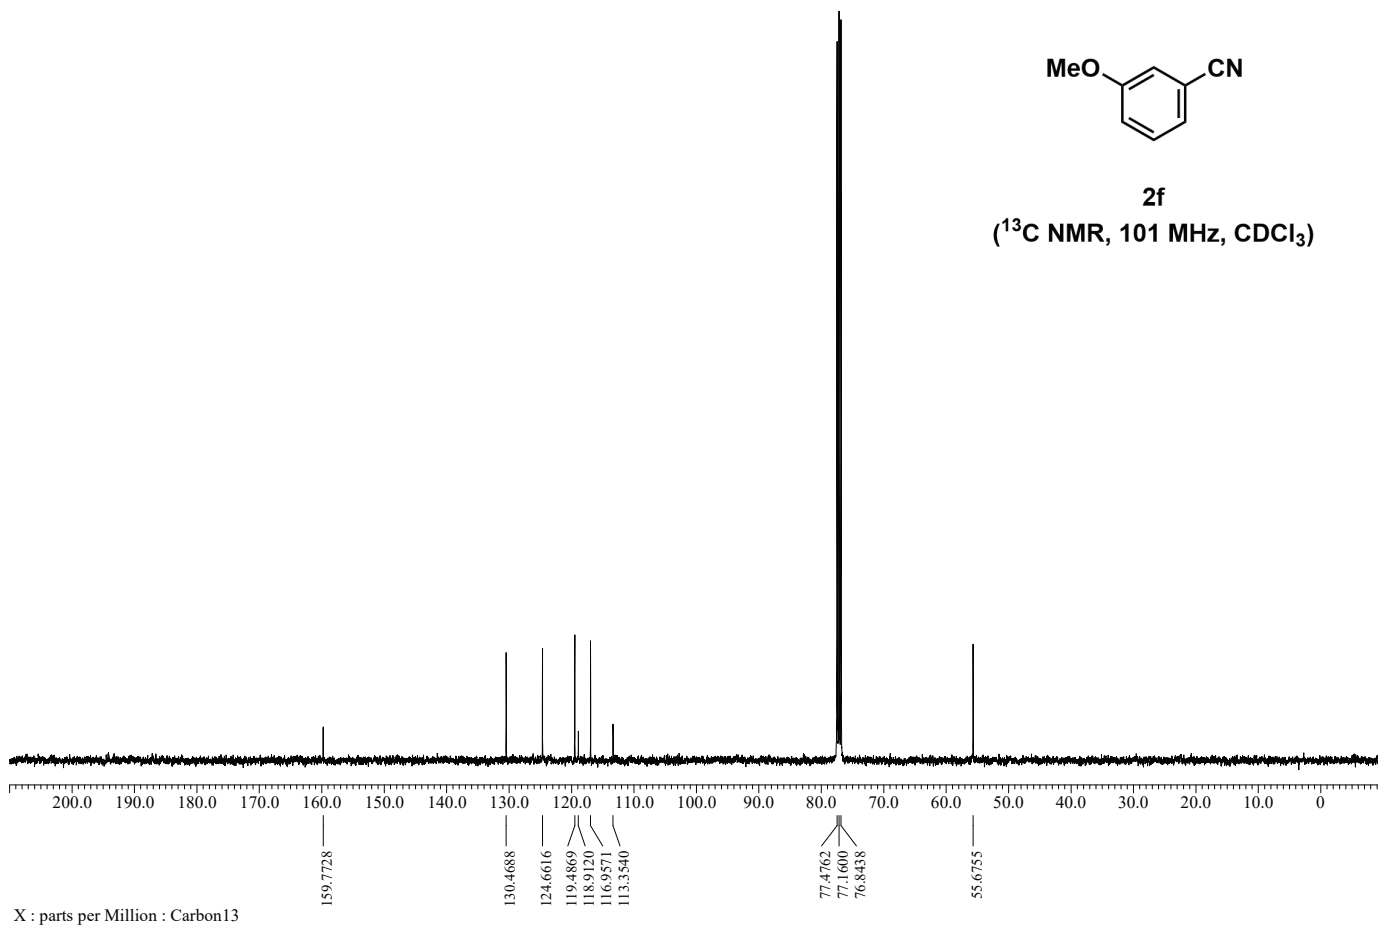

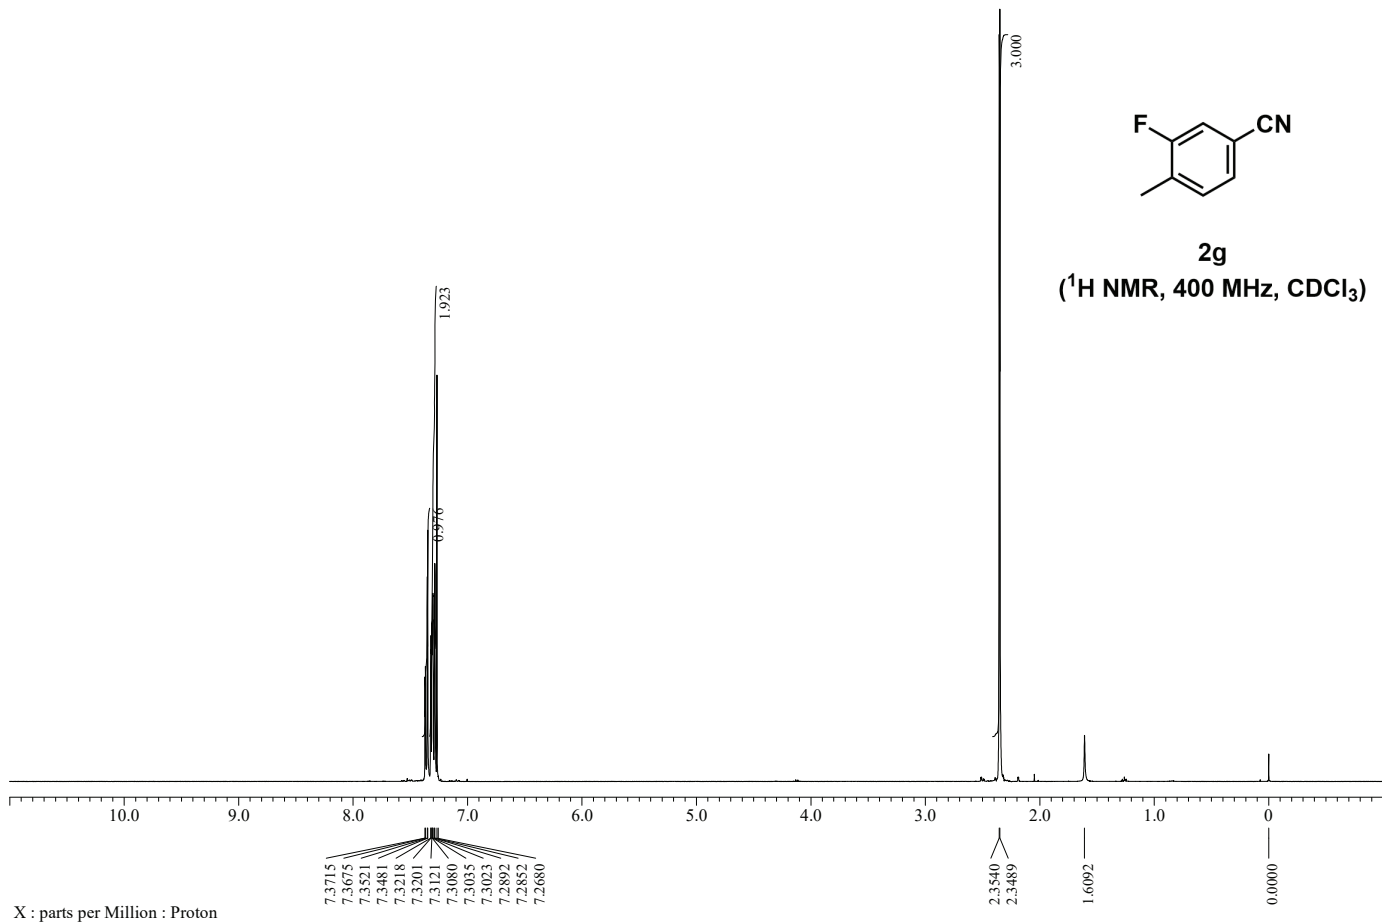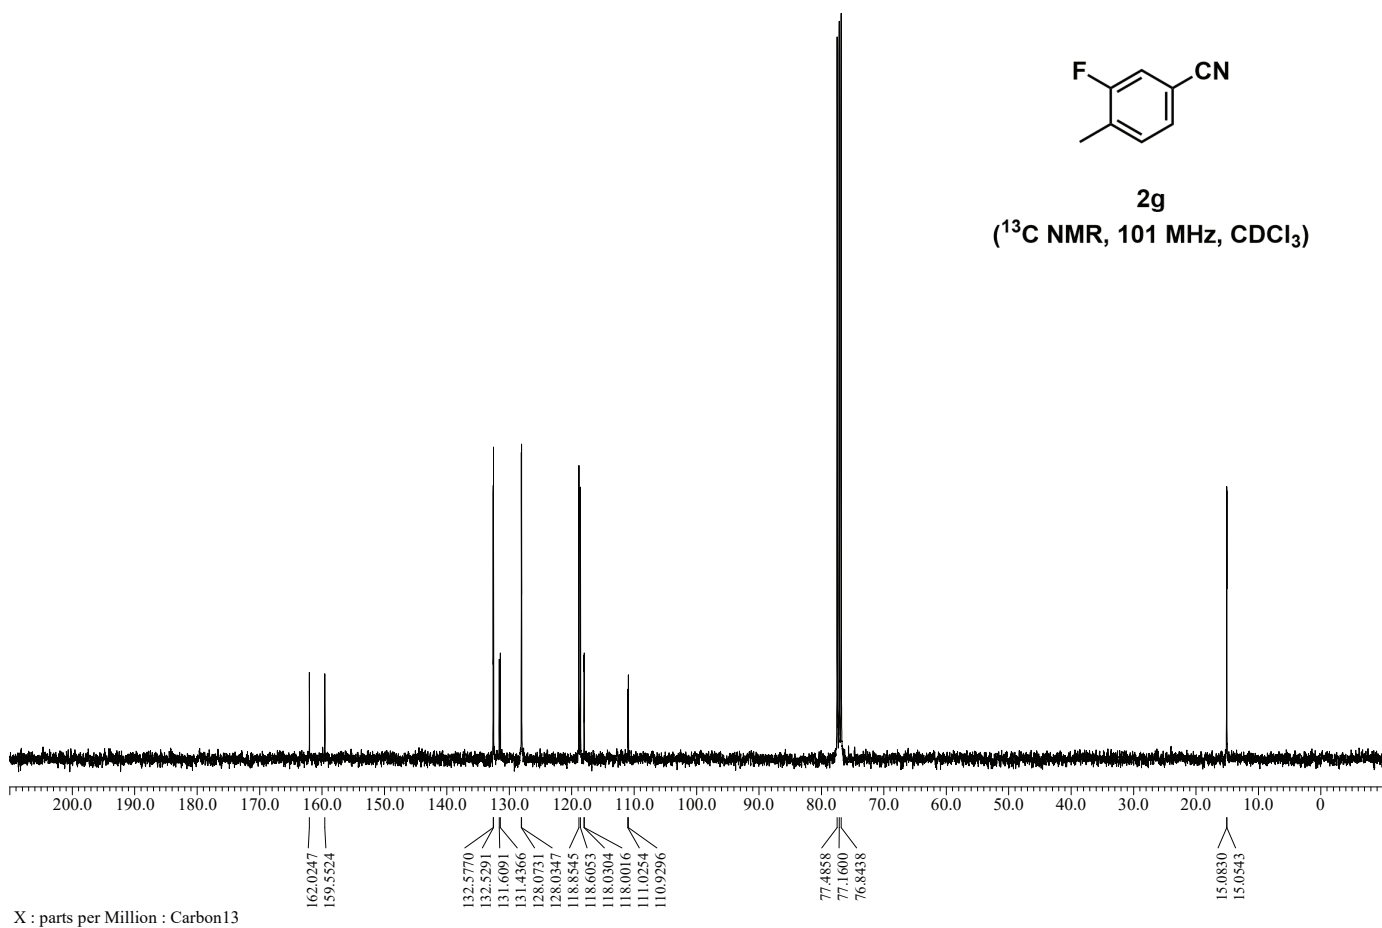

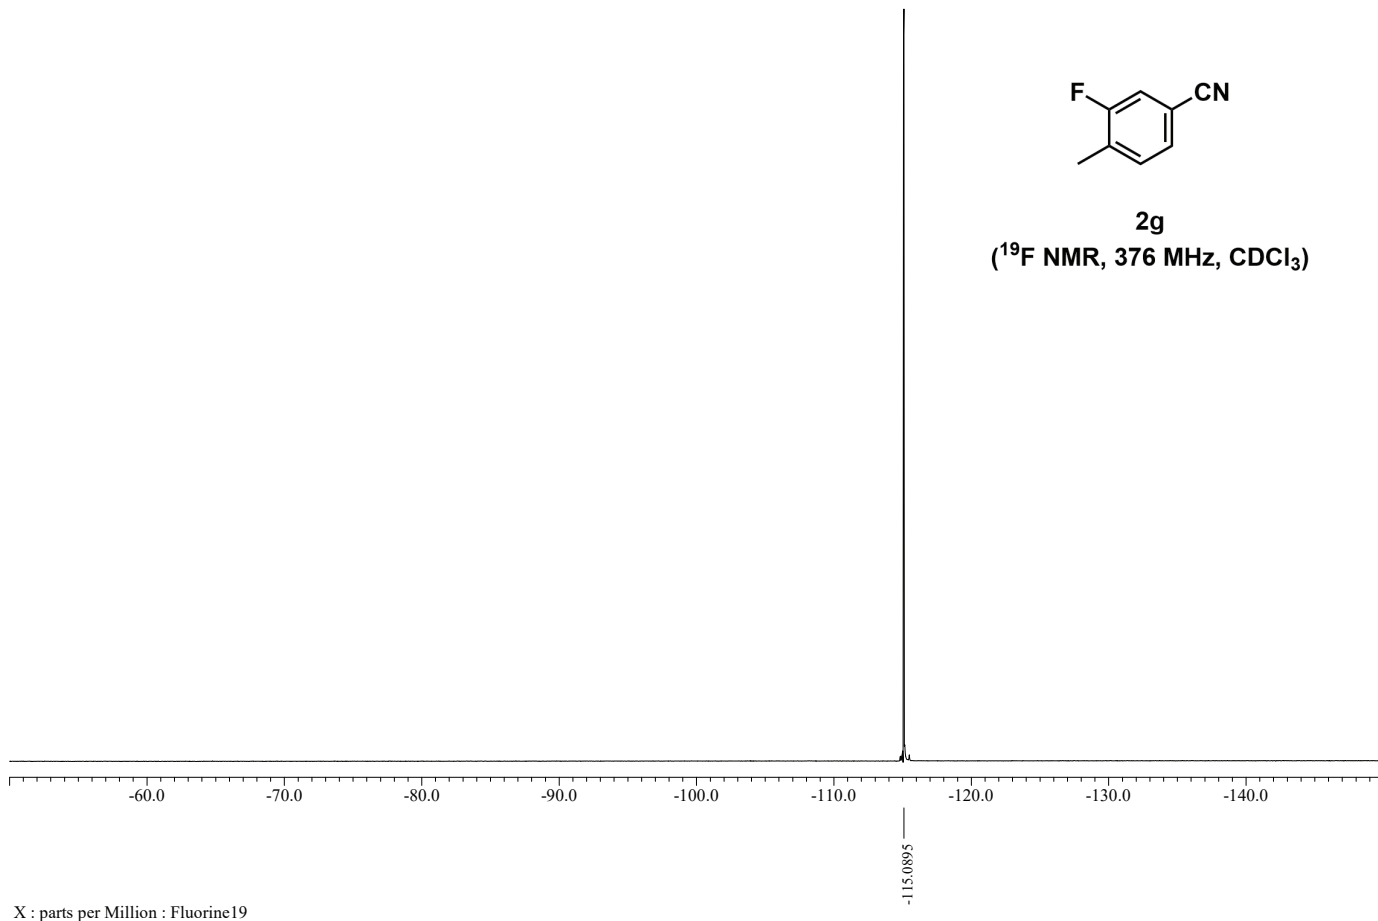

X : parts per Million : Fluorine19

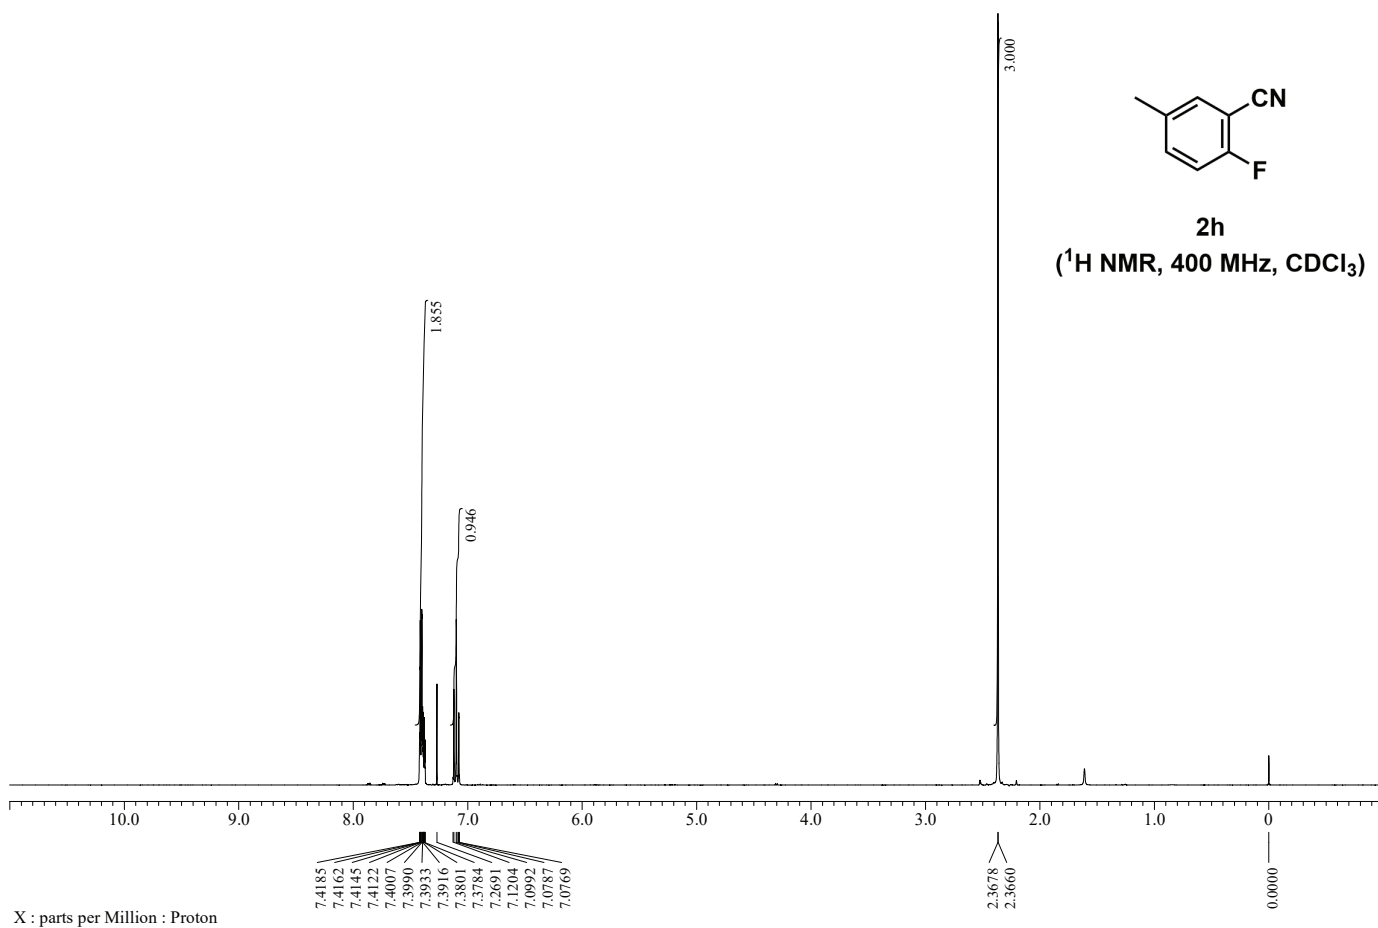

X : parts per Million : Proton

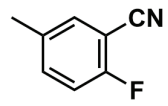

2h  
(<sup>13</sup>C NMR, 101 MHz, CDCl<sub>3</sub>)

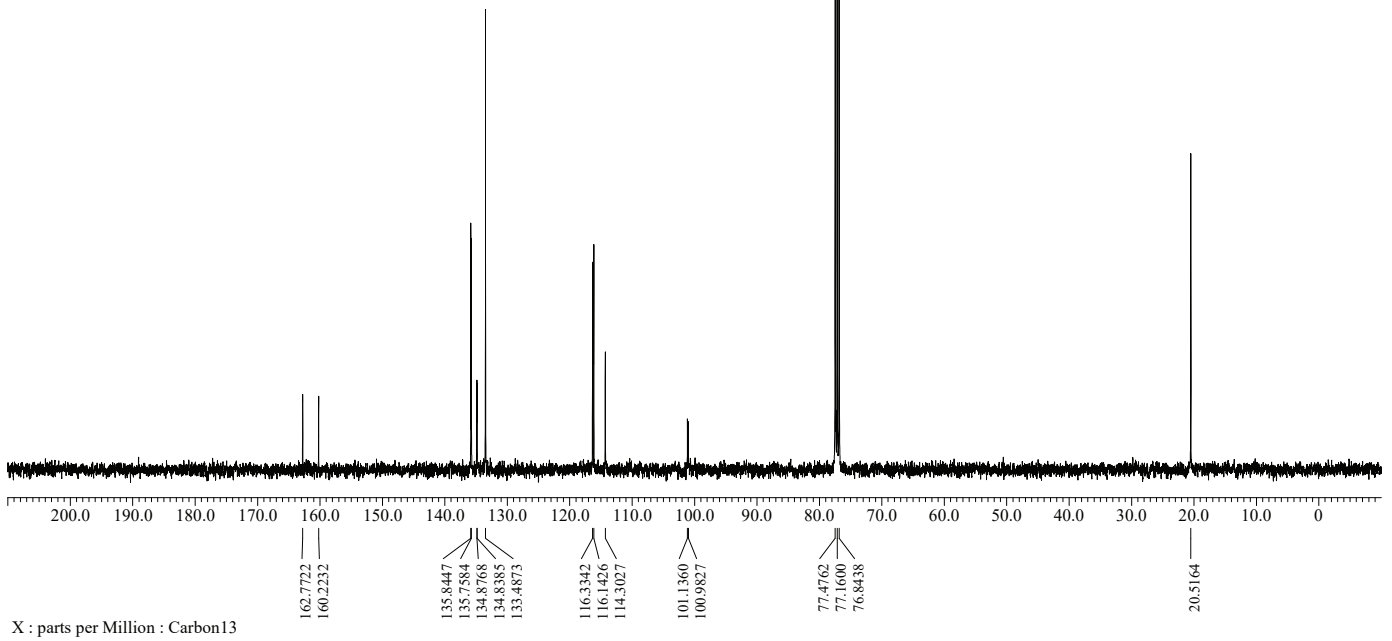

X : parts per Million : Carbon13

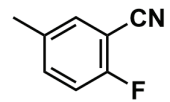

2h  
(<sup>19</sup>F NMR, 376 MHz, CDCl<sub>3</sub>)

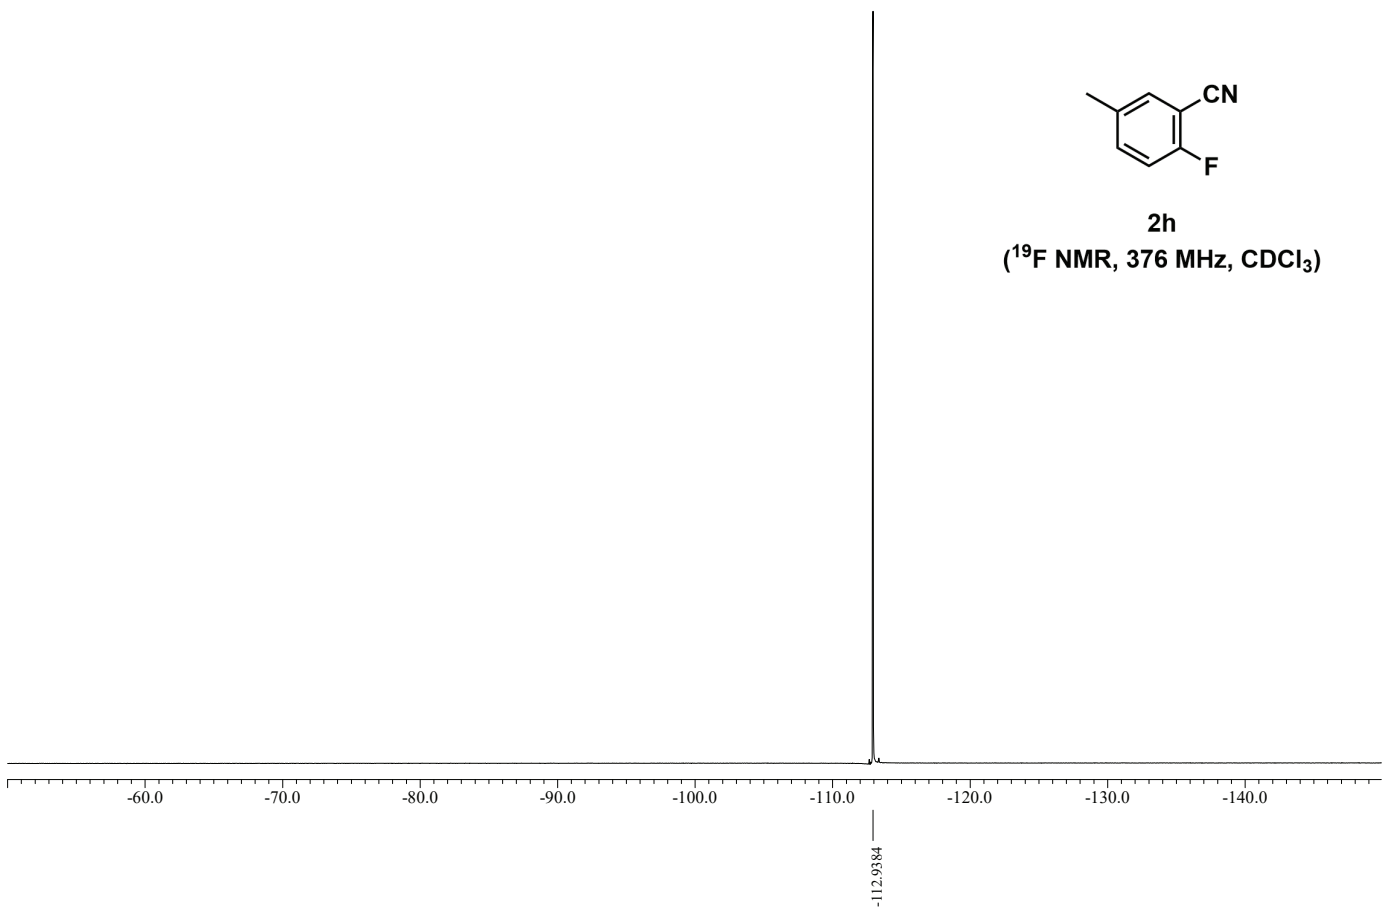

X : parts per Million : Fluorine19



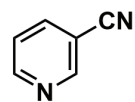

**2i**  
(<sup>1</sup>H NMR, 400 MHz, CDCl<sub>3</sub>)

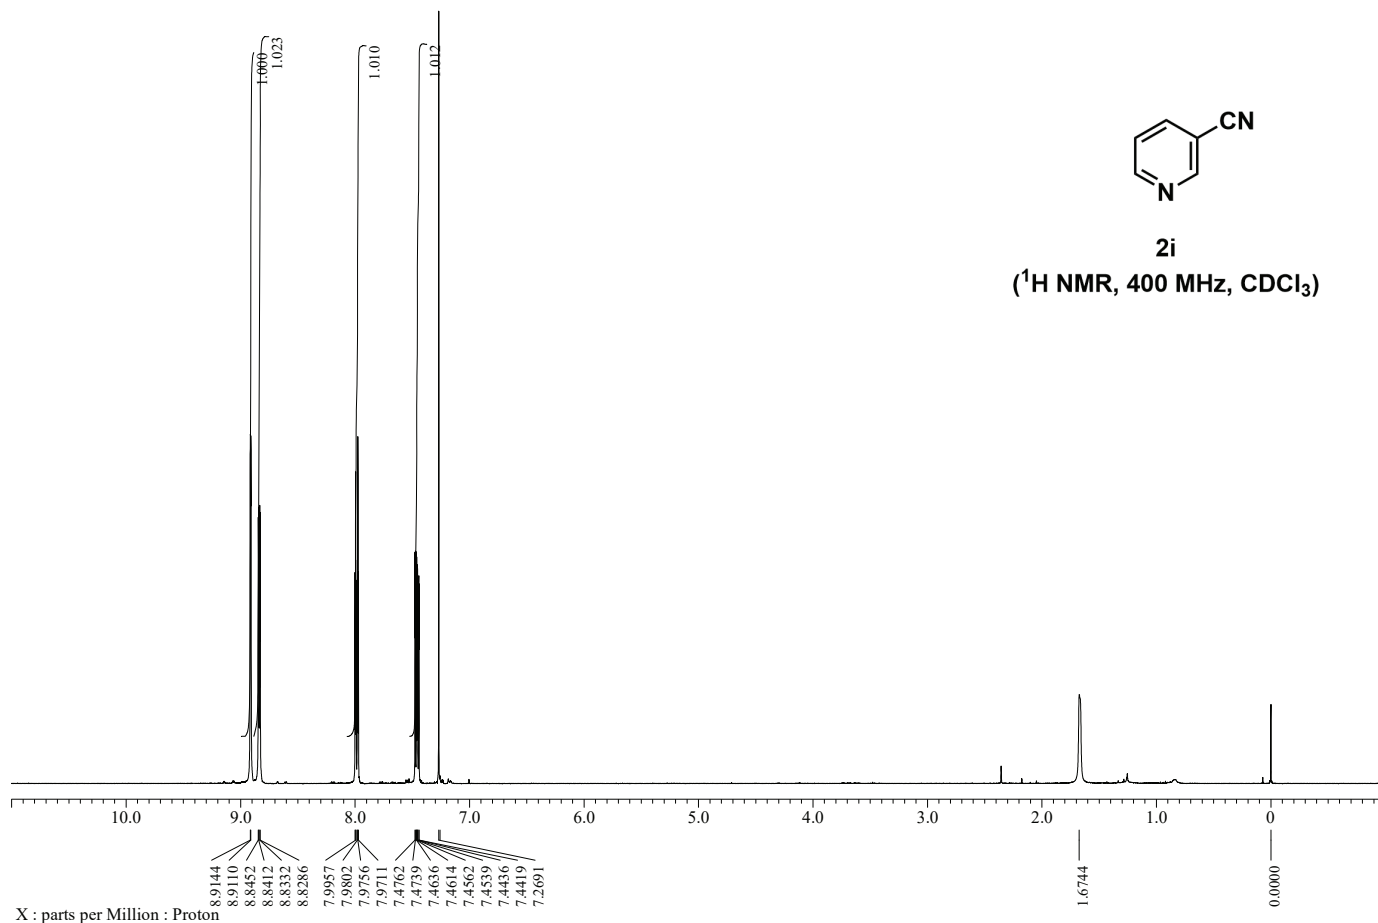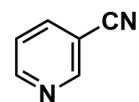

**2i**  
(<sup>13</sup>C NMR, 101 MHz, CDCl<sub>3</sub>)

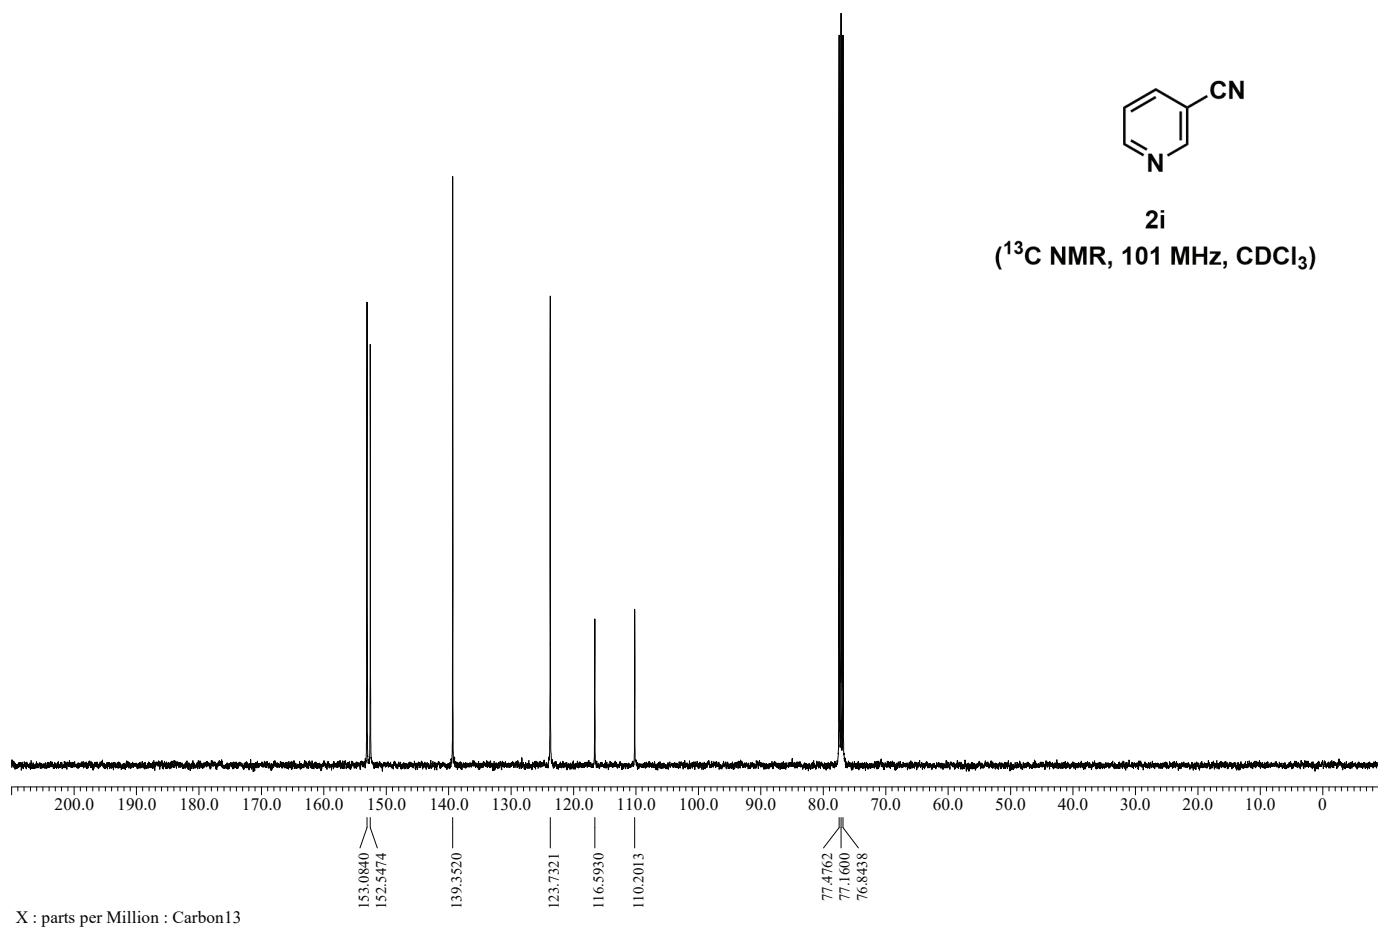

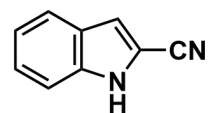

2j

(<sup>1</sup>H NMR, 400 MHz, CDCl<sub>3</sub>)

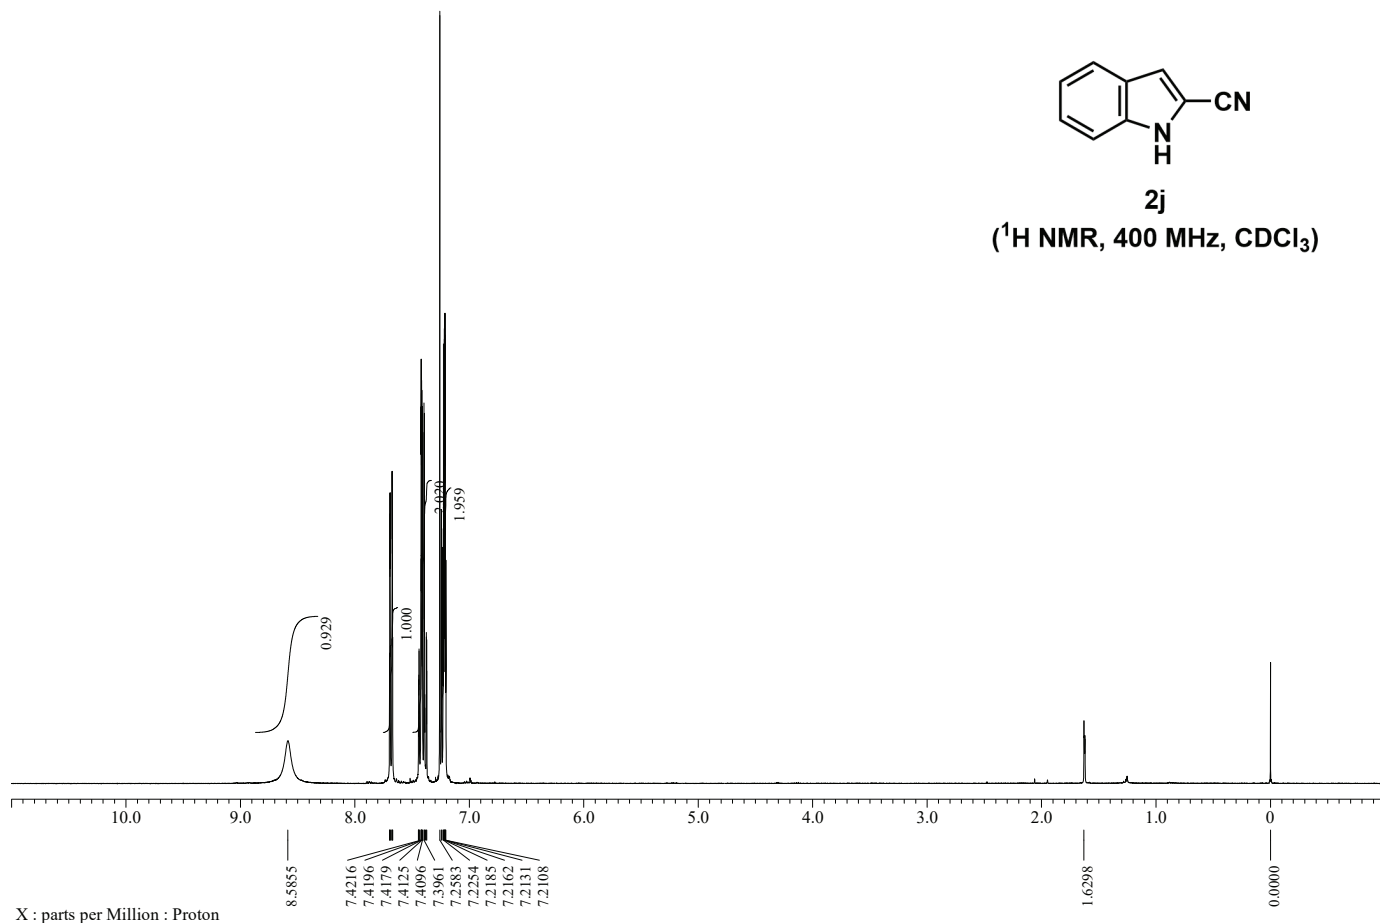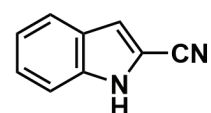

2j

(<sup>13</sup>C NMR, 101 MHz, CDCl<sub>3</sub>)

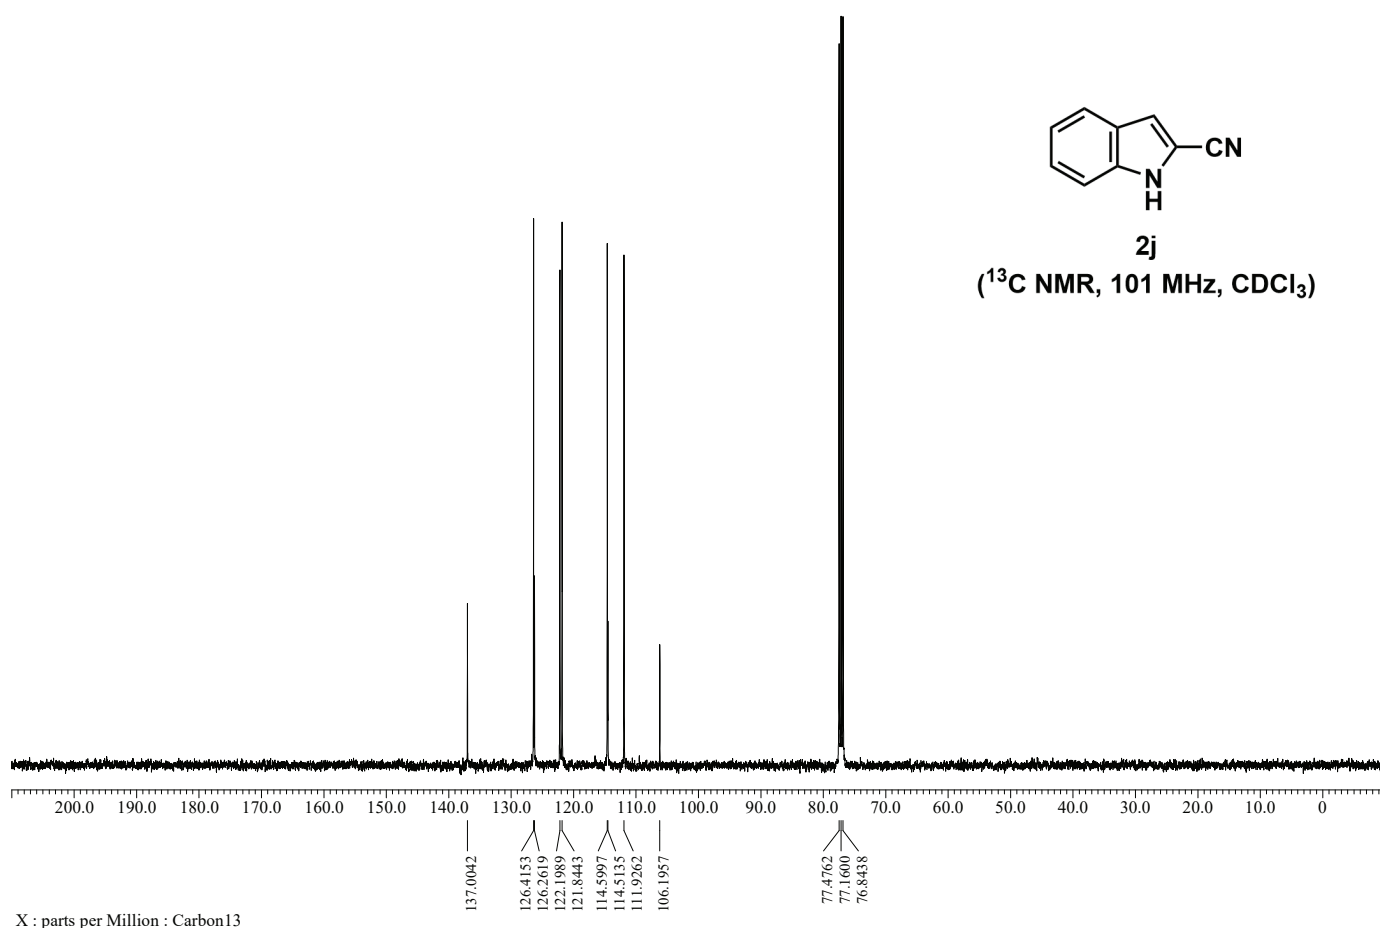

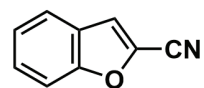

2k

(<sup>1</sup>H NMR, 400 MHz, CDCl<sub>3</sub>)

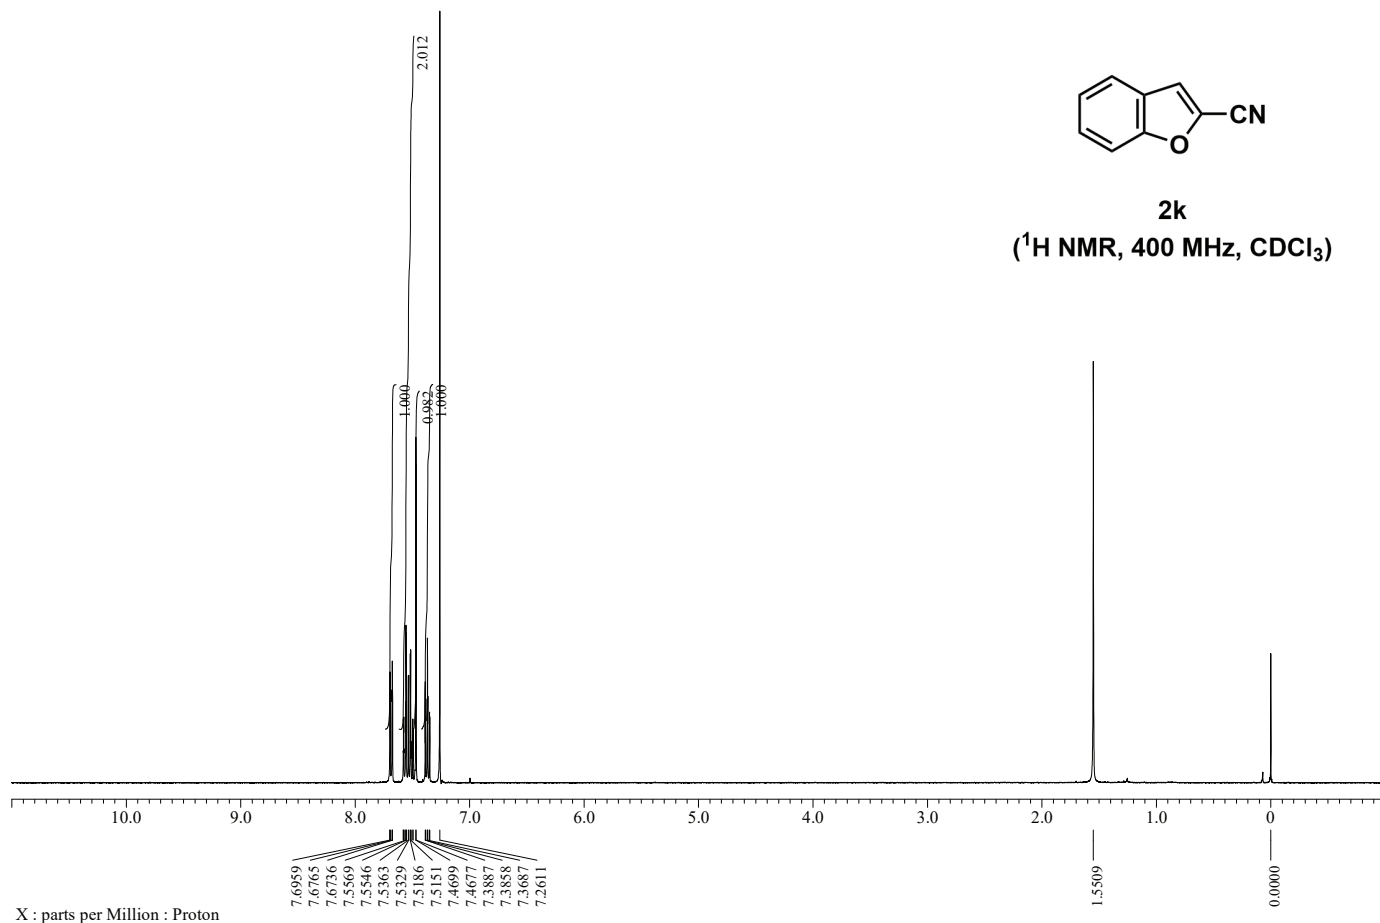

X : parts per Million : Proton

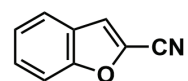

2k

(<sup>13</sup>C NMR, 101 MHz, CDCl<sub>3</sub>)

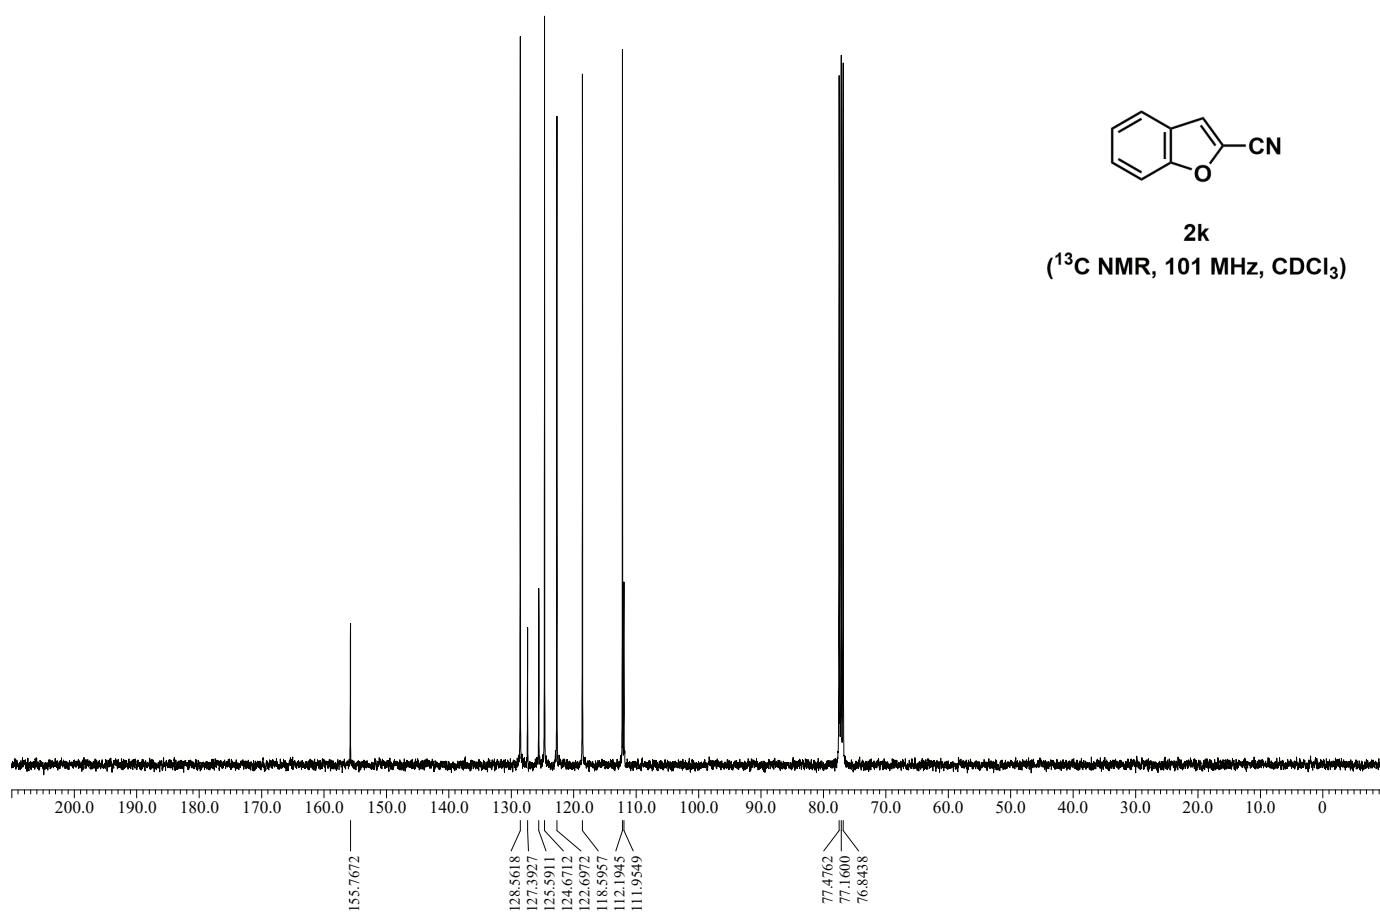

X : parts per Million : Carbon13

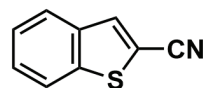

21

(<sup>1</sup>H NMR, 400 MHz, CDCl<sub>3</sub>)

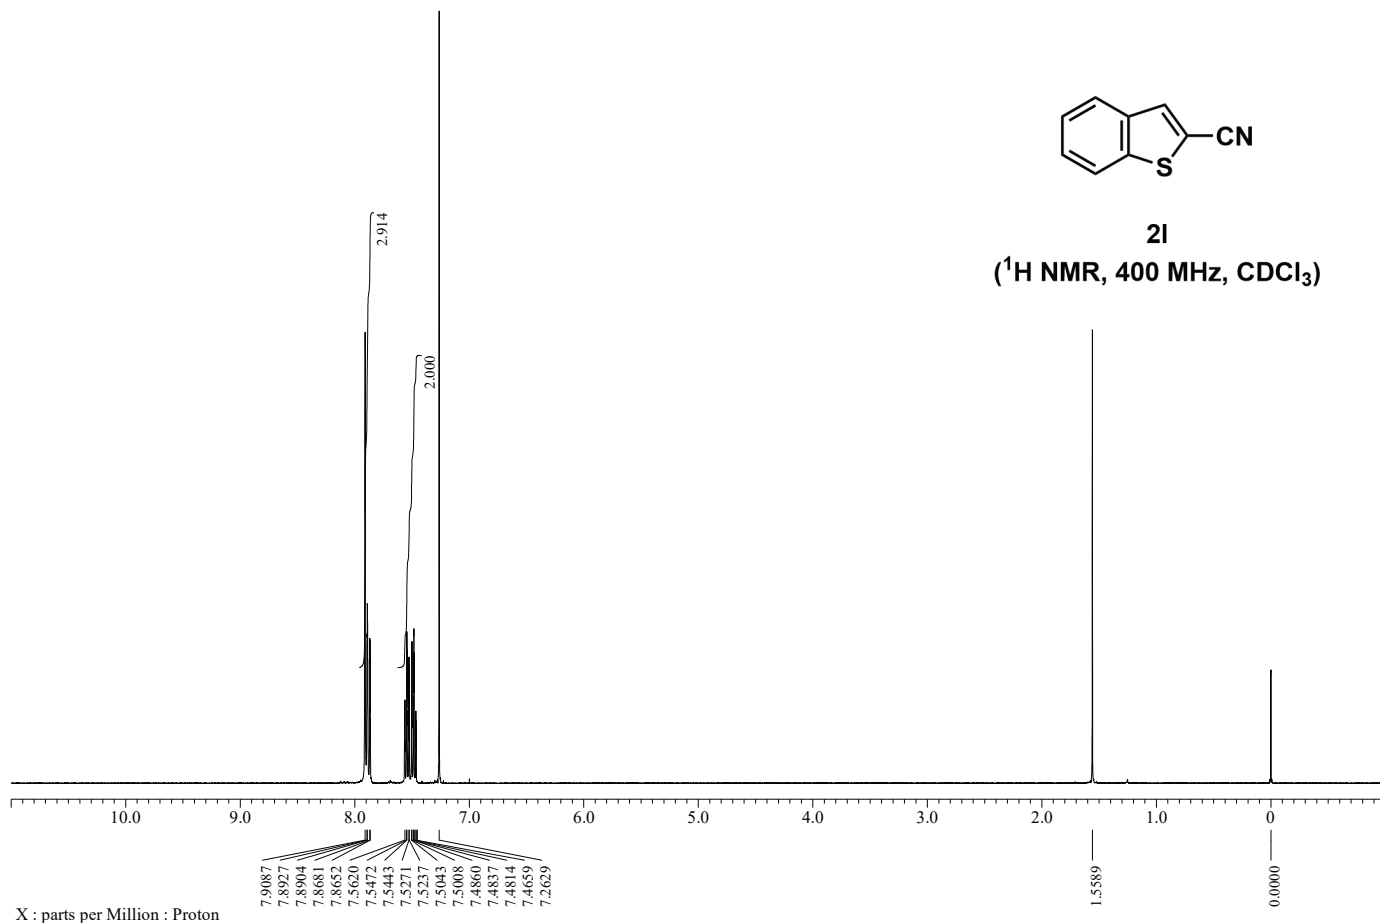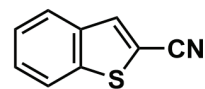

21

(<sup>13</sup>C NMR, 101 MHz, CDCl<sub>3</sub>)

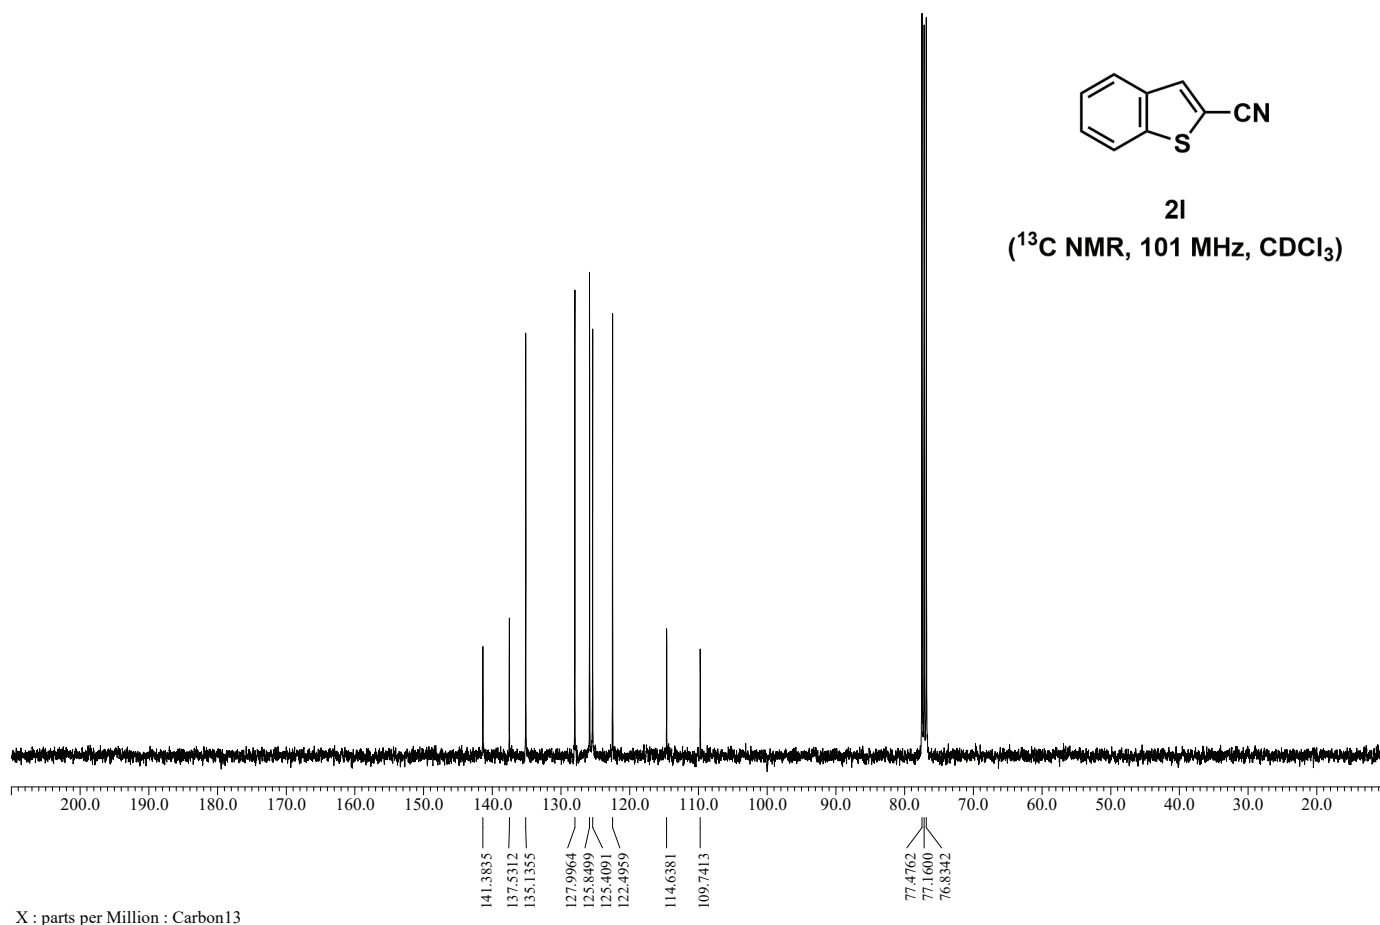

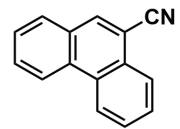

2m

(<sup>1</sup>H NMR, 400 MHz, CDCl<sub>3</sub>)

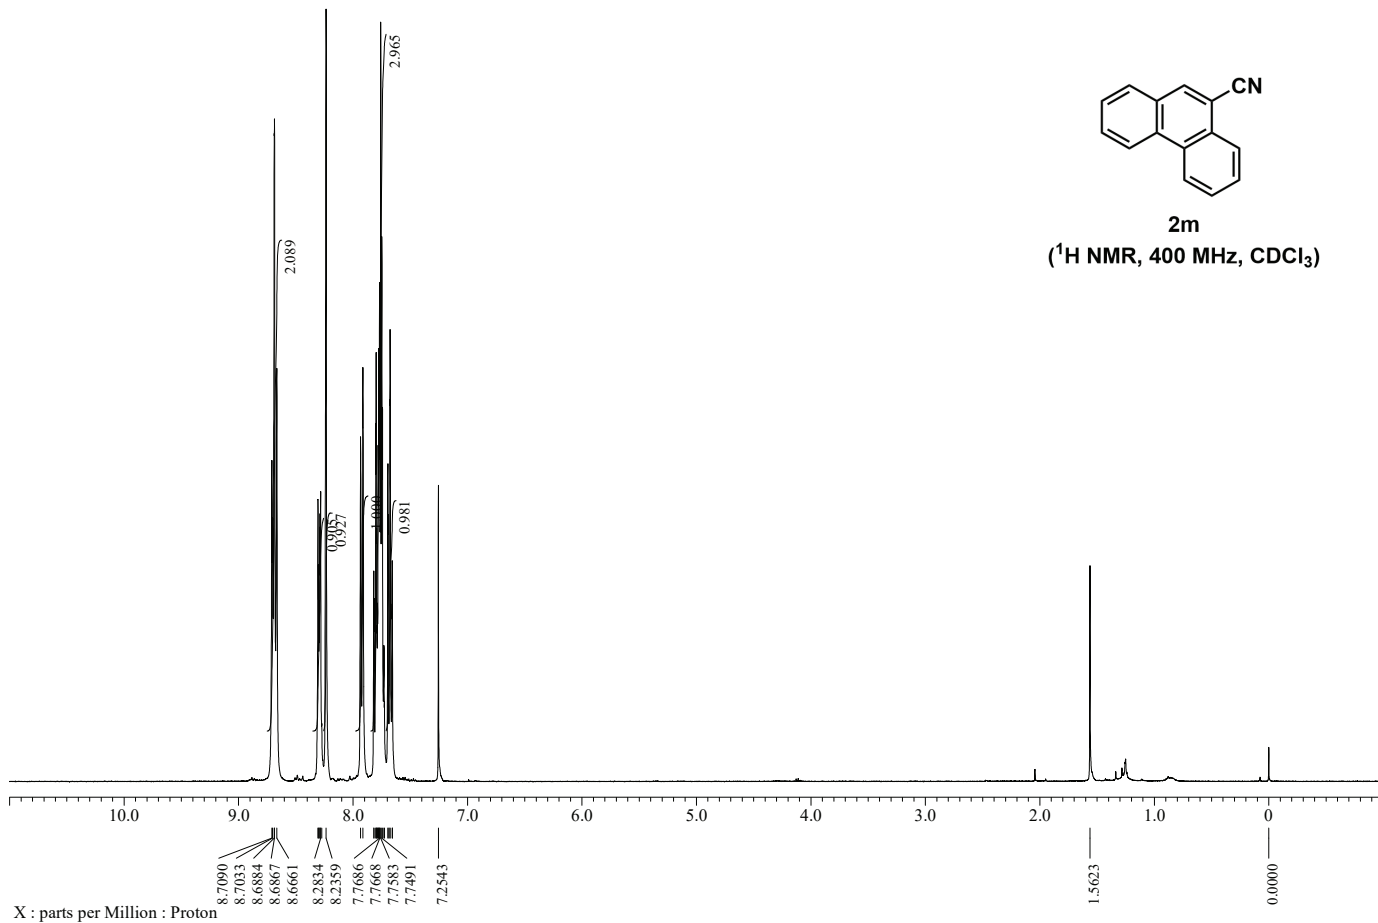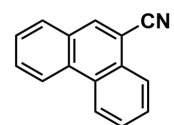

2m

(<sup>13</sup>C NMR, 101 MHz, CDCl<sub>3</sub>)

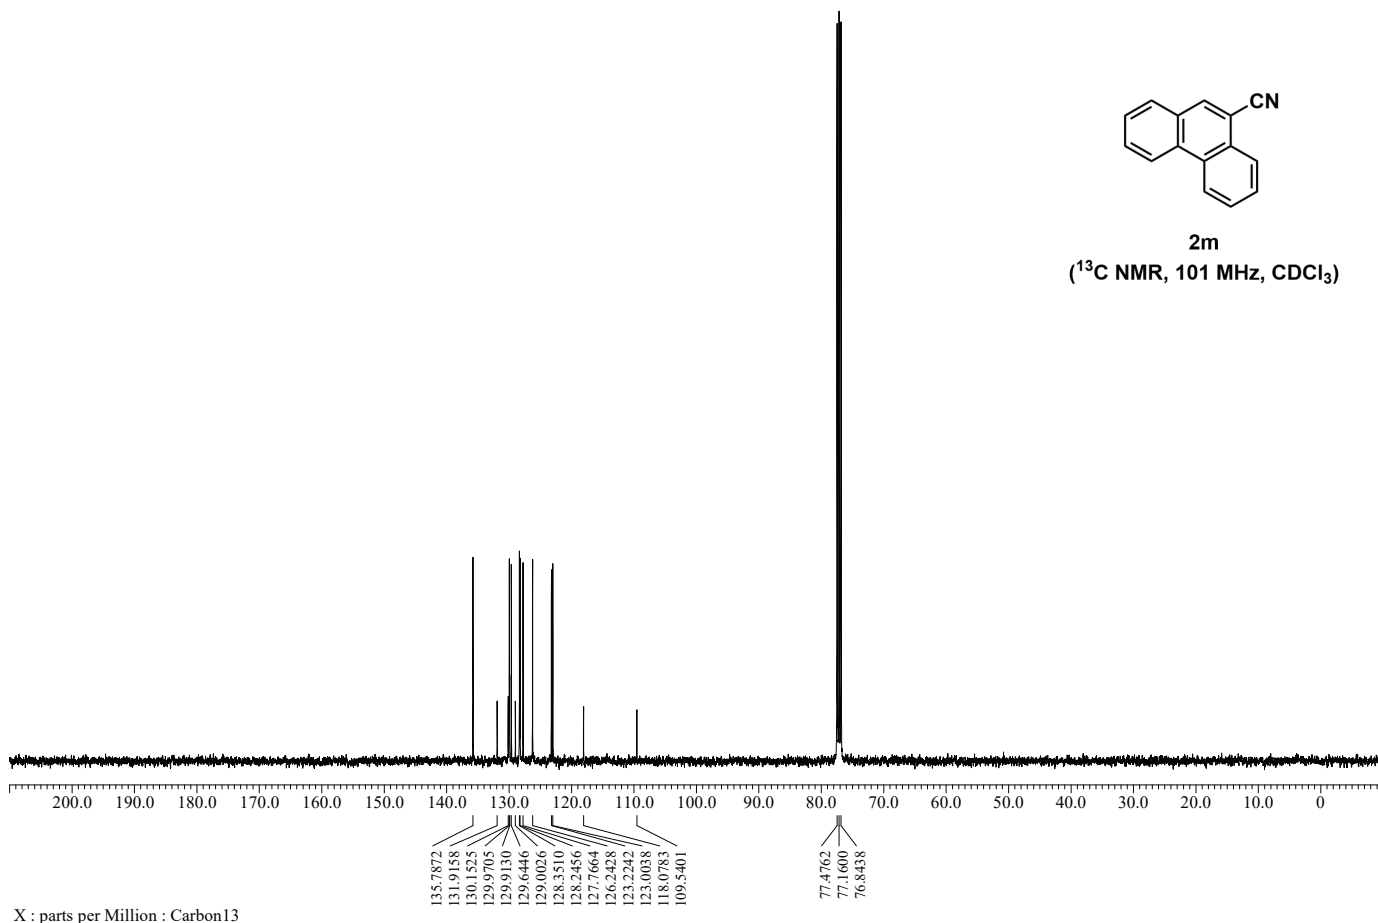

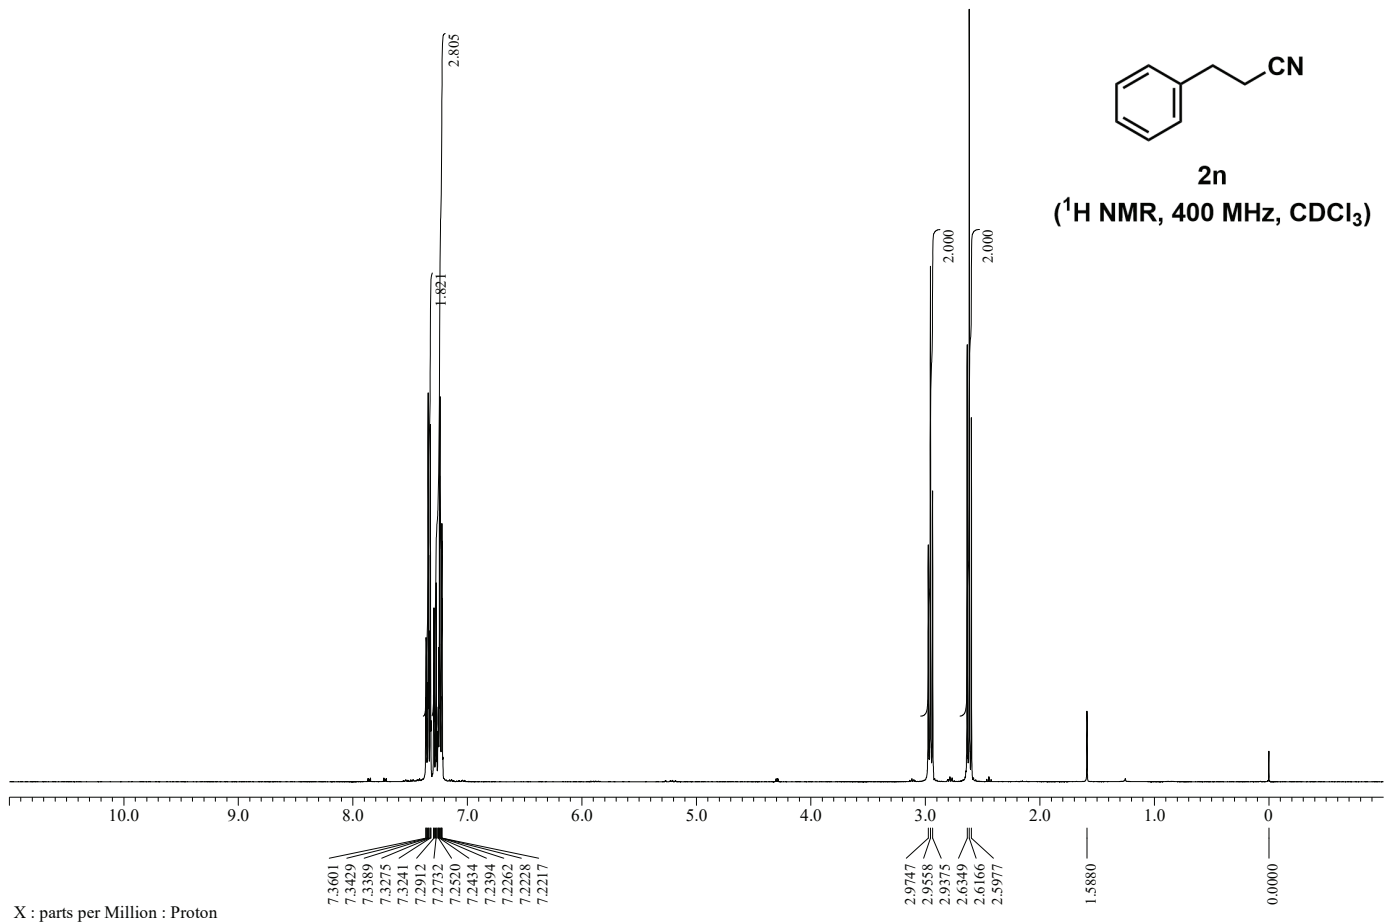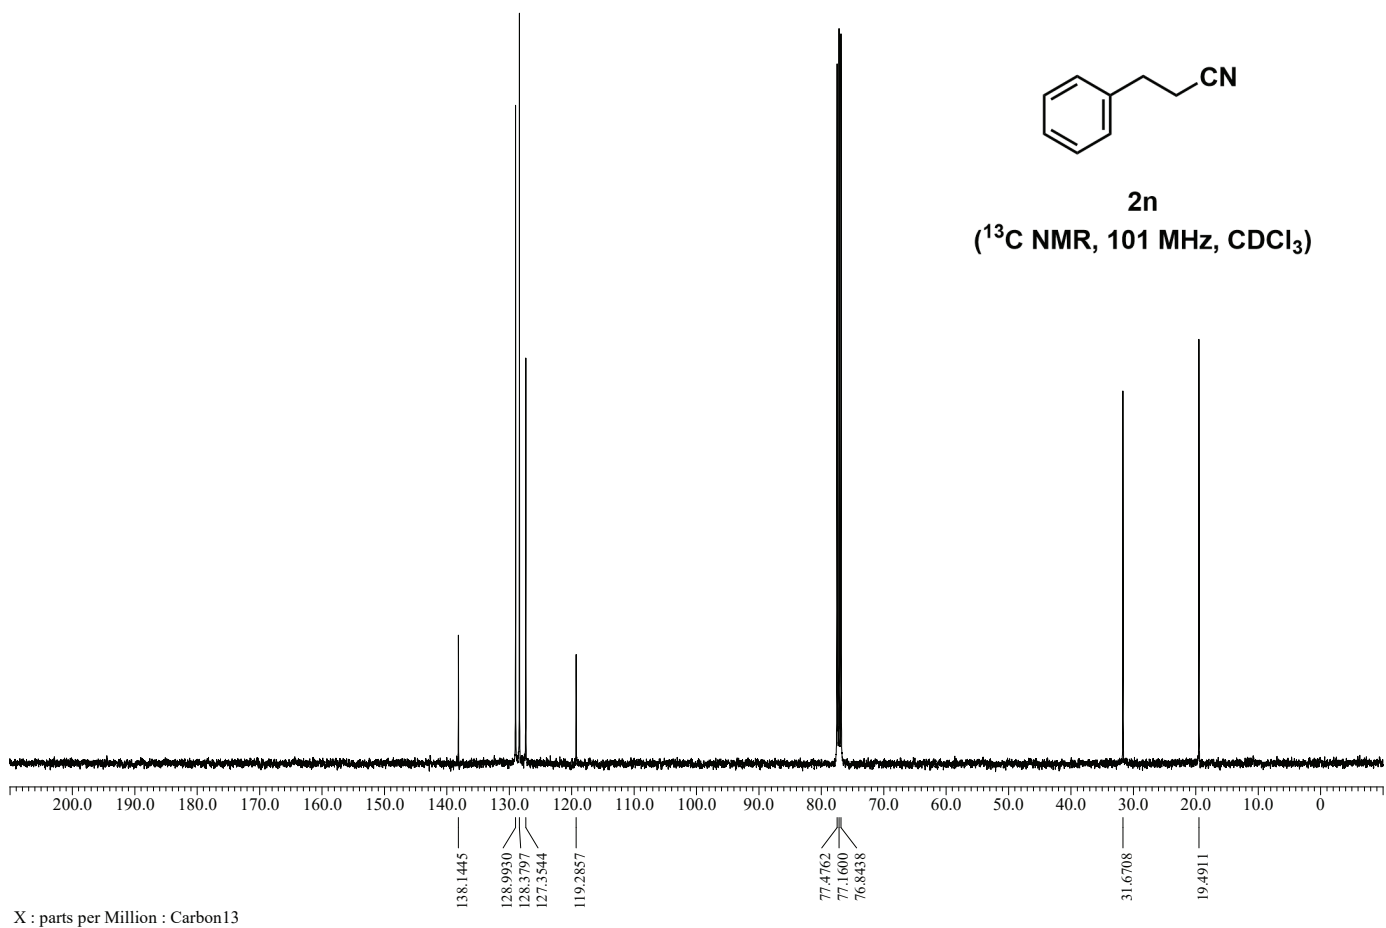

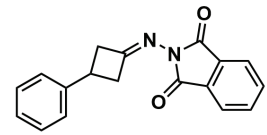

**3a**  
 (<sup>1</sup>H NMR, 400 MHz, CDCl<sub>3</sub>)

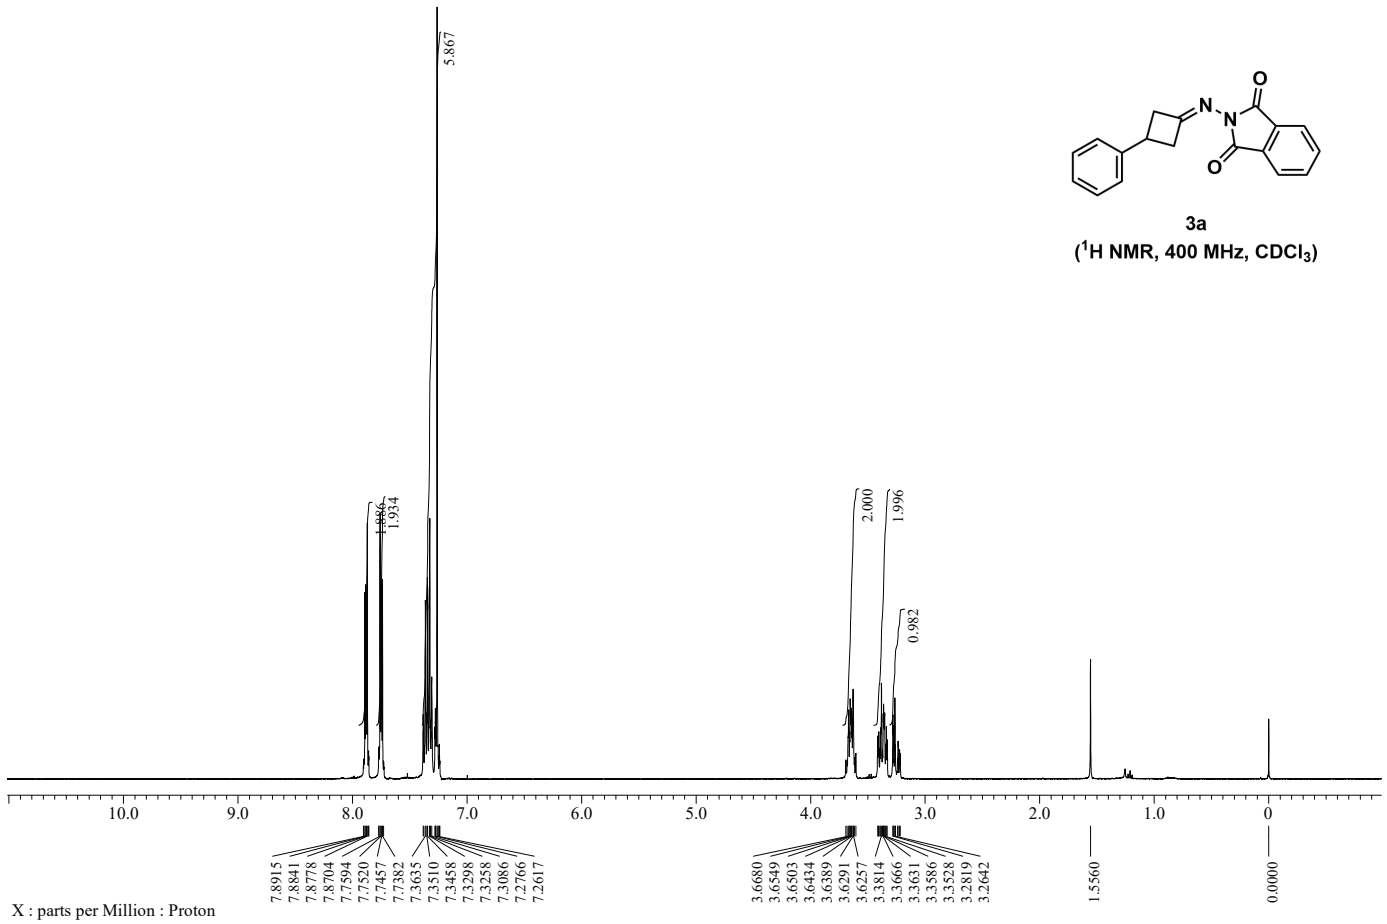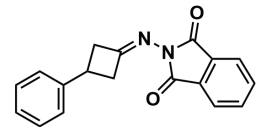

**3a**  
 (<sup>13</sup>C NMR, 101 MHz, CDCl<sub>3</sub>)

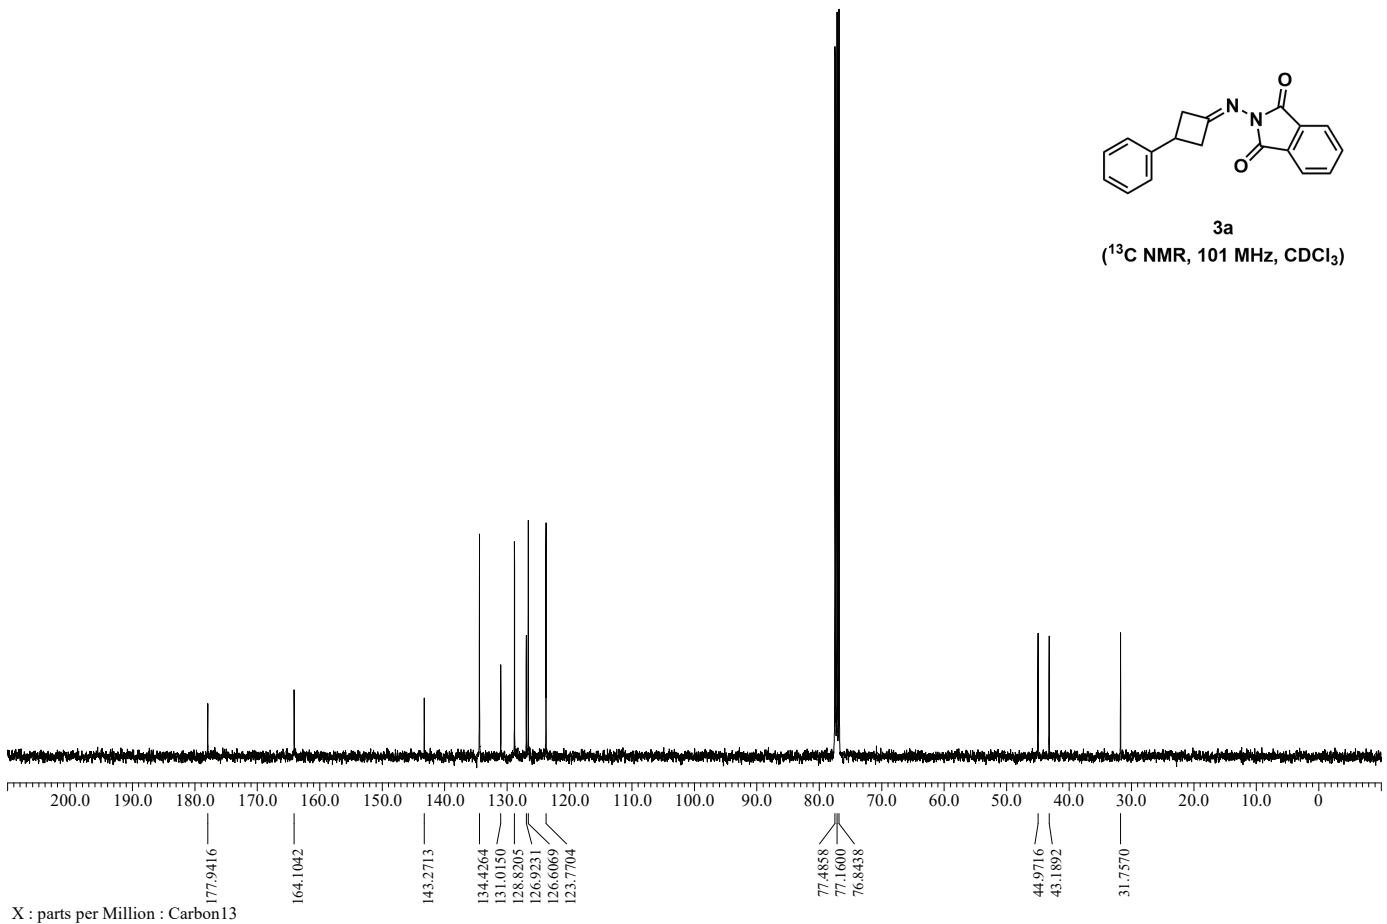

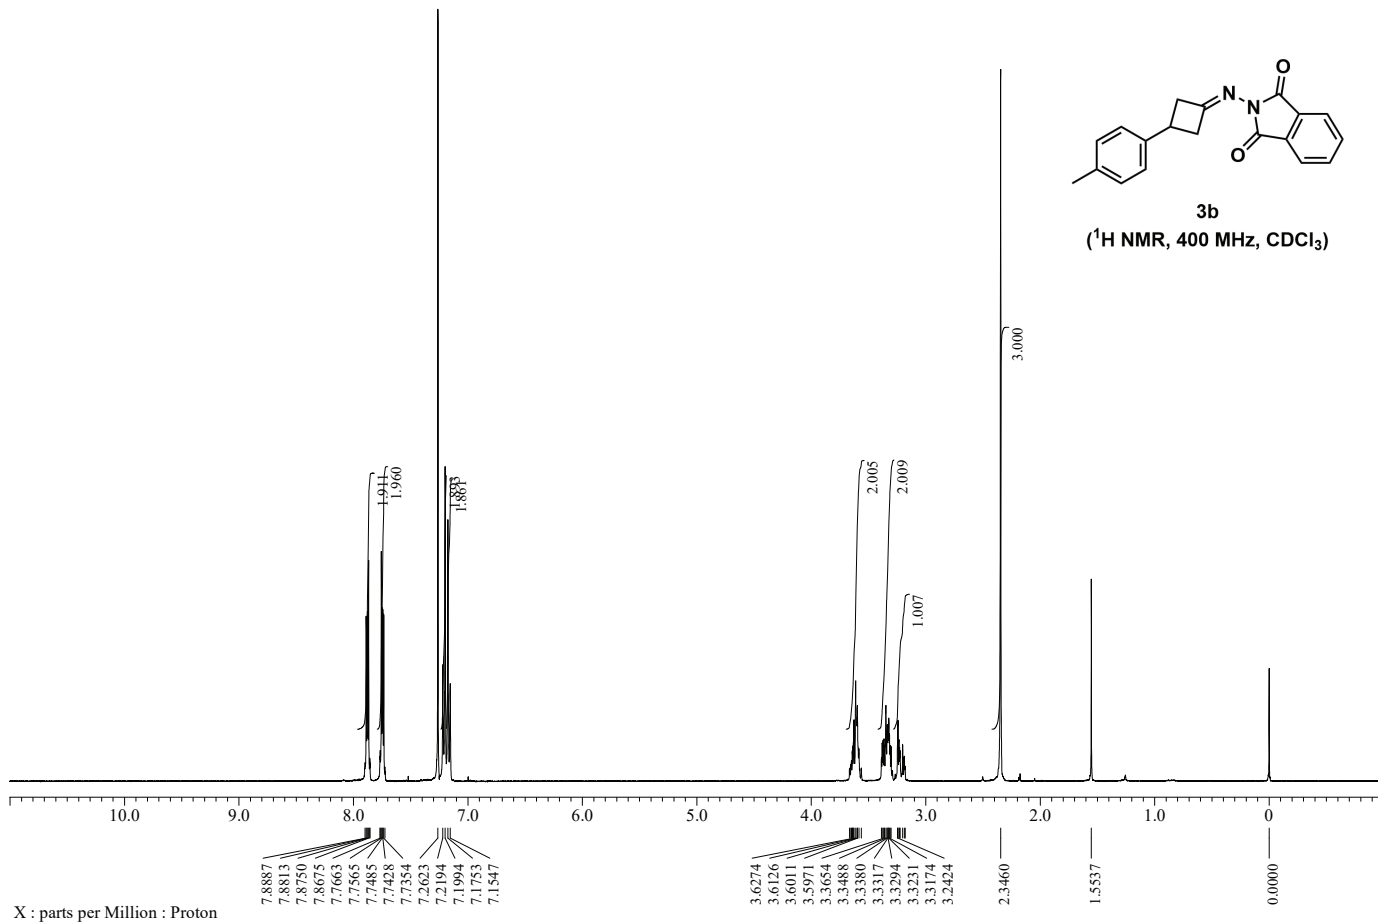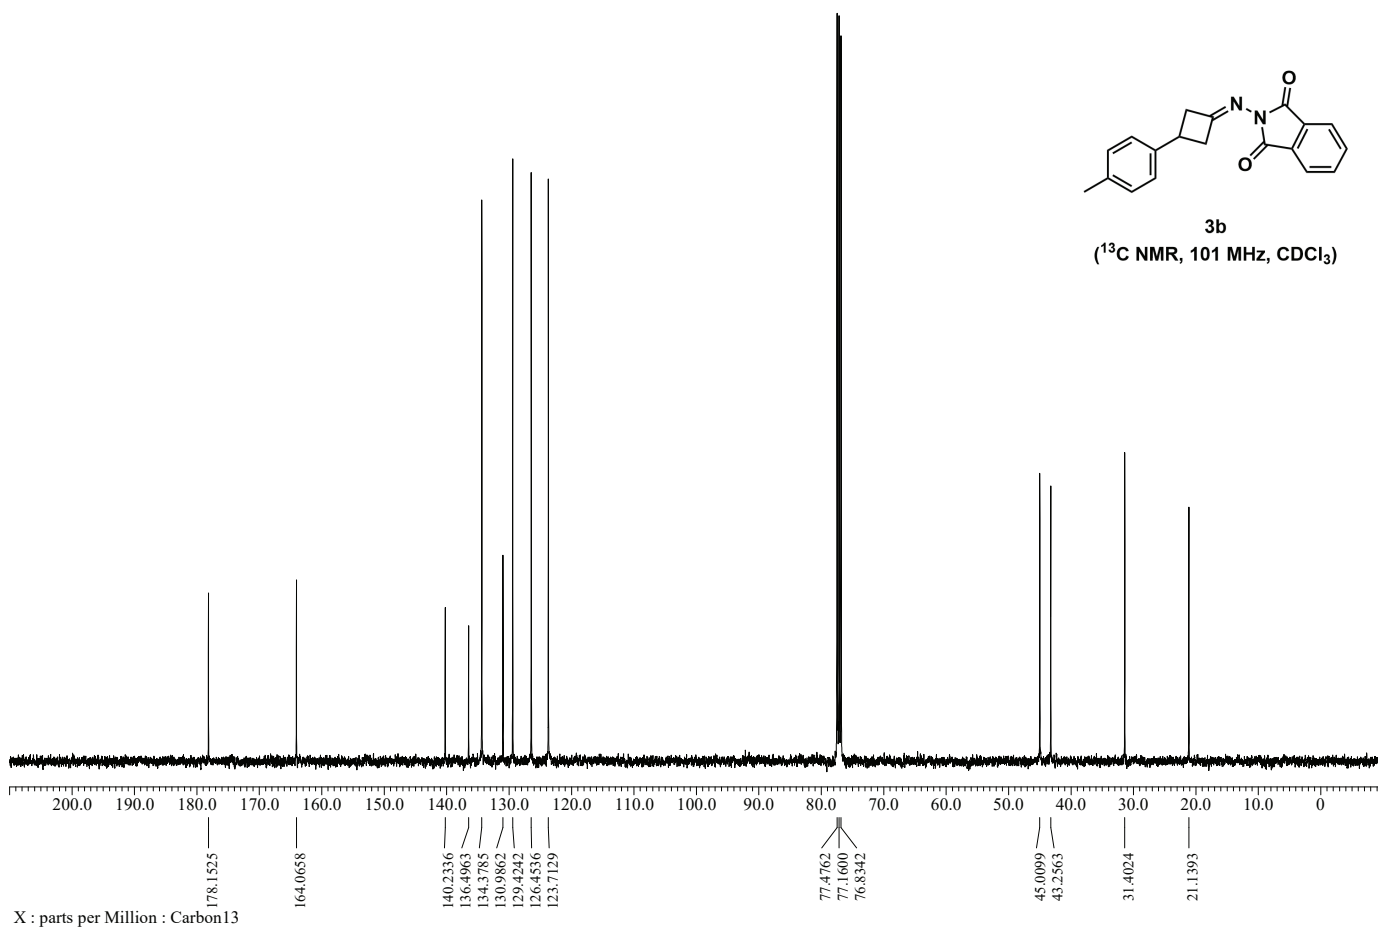



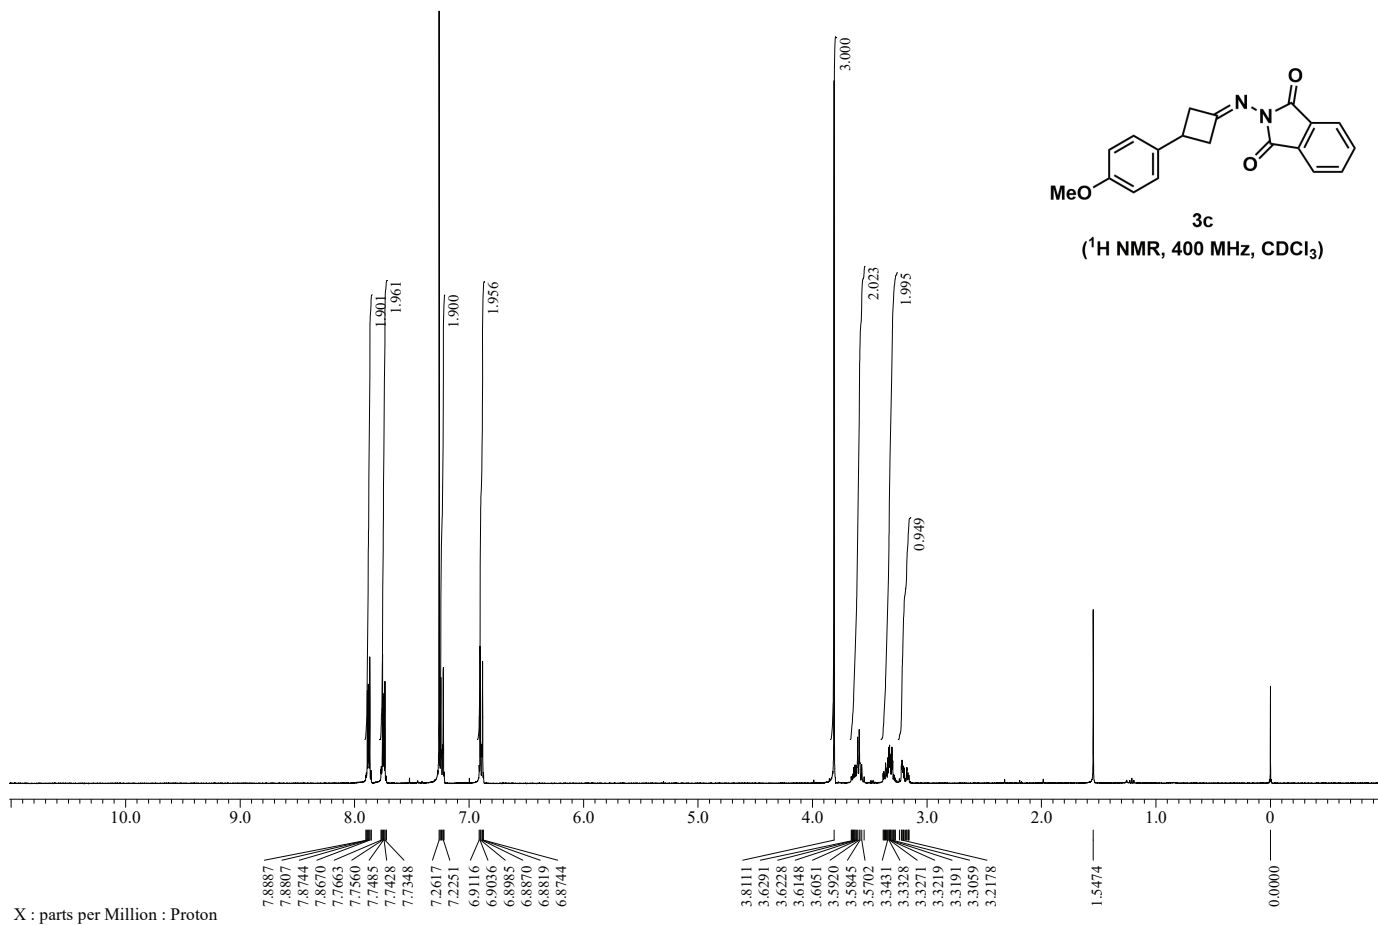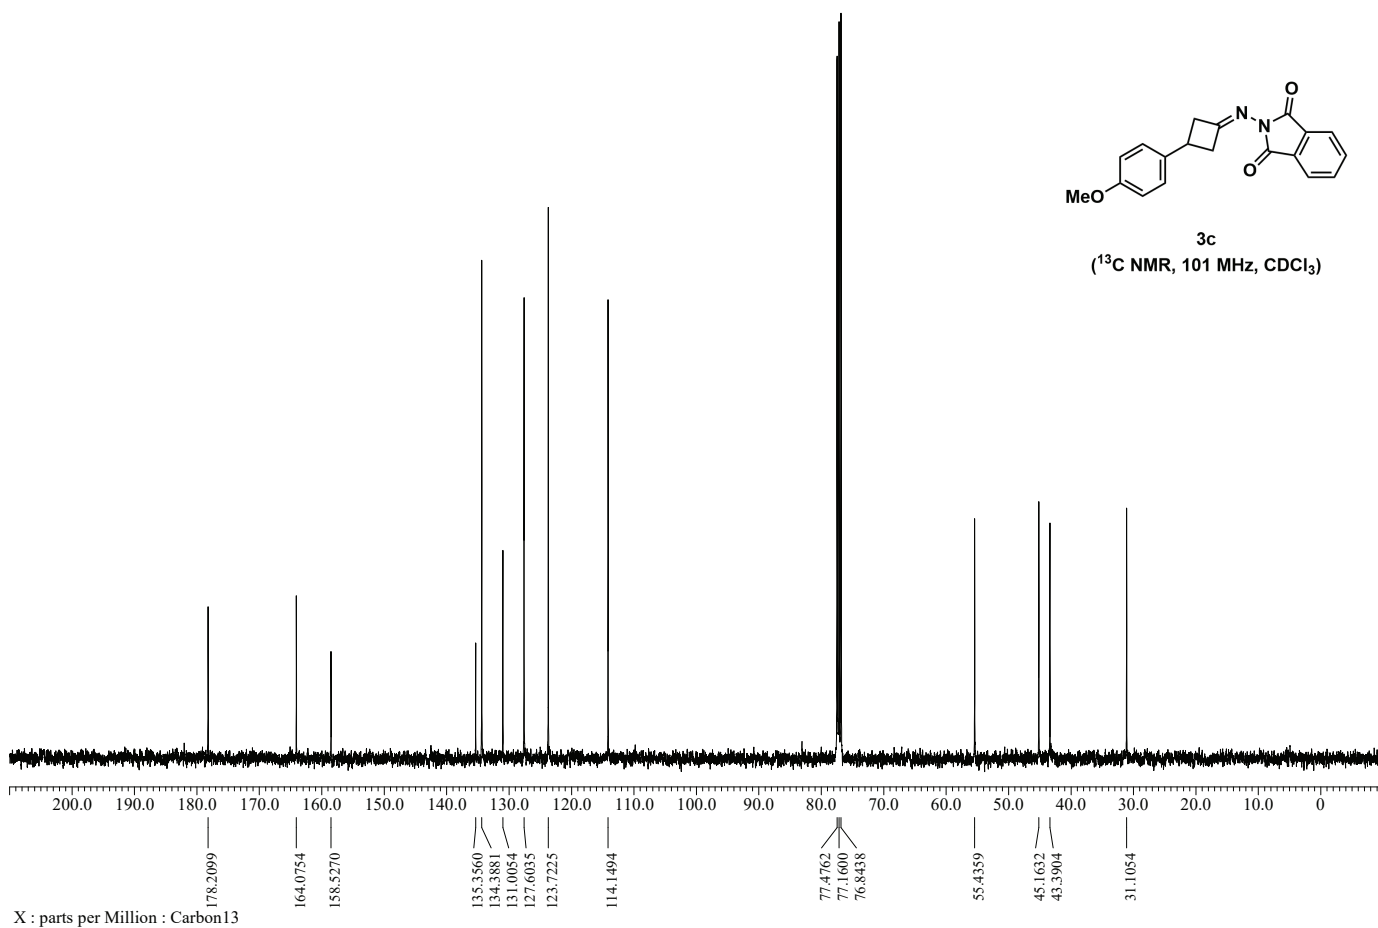

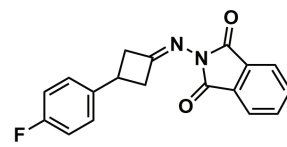

**3d**  
(<sup>1</sup>H NMR, 400 MHz, CDCl<sub>3</sub>)

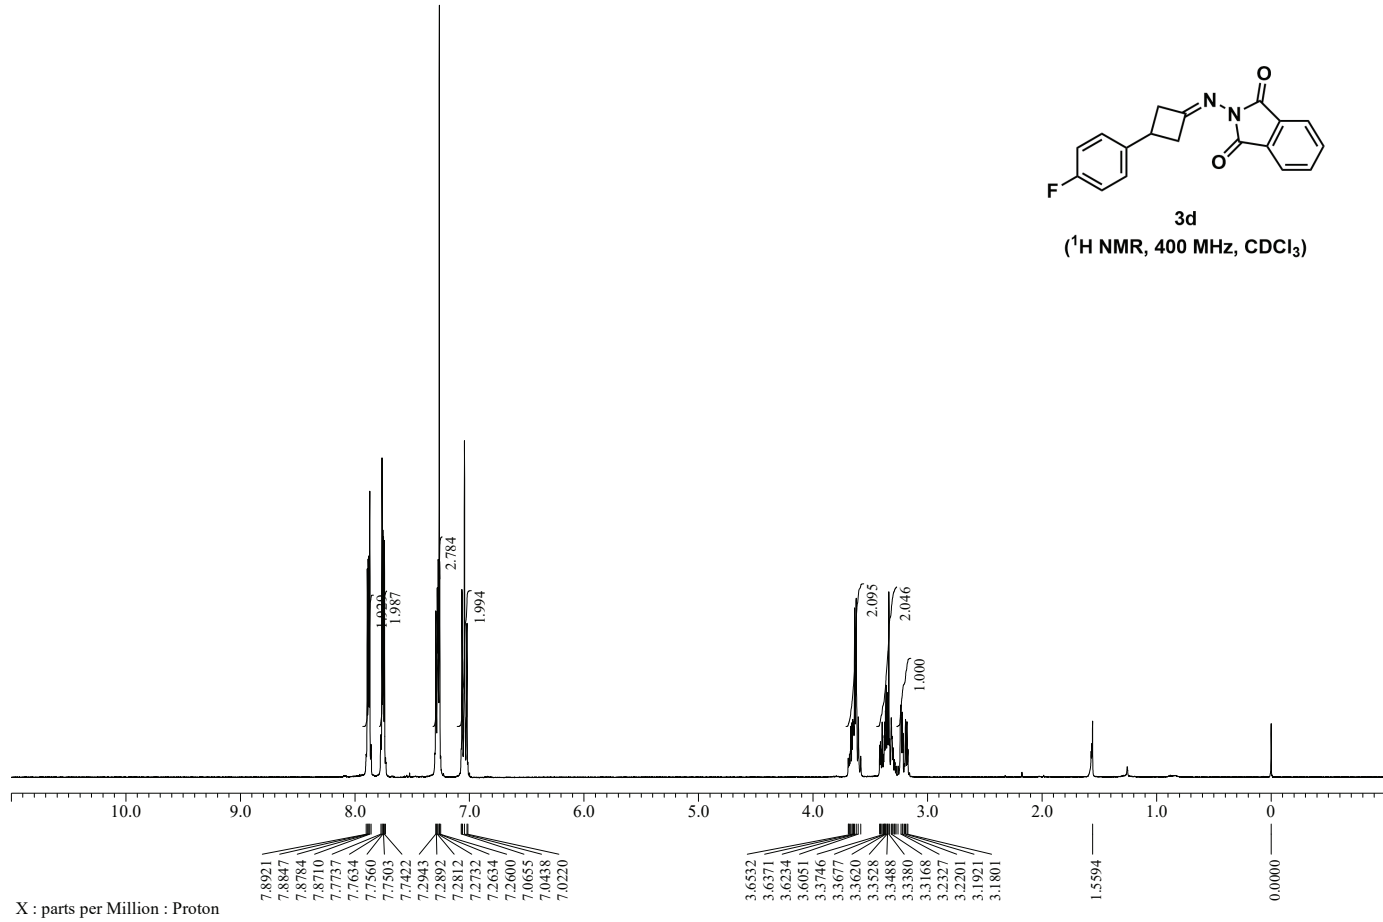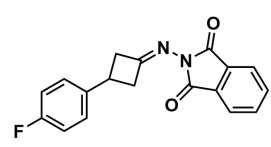

**3d**  
(<sup>13</sup>C NMR, 101 MHz, CDCl<sub>3</sub>)

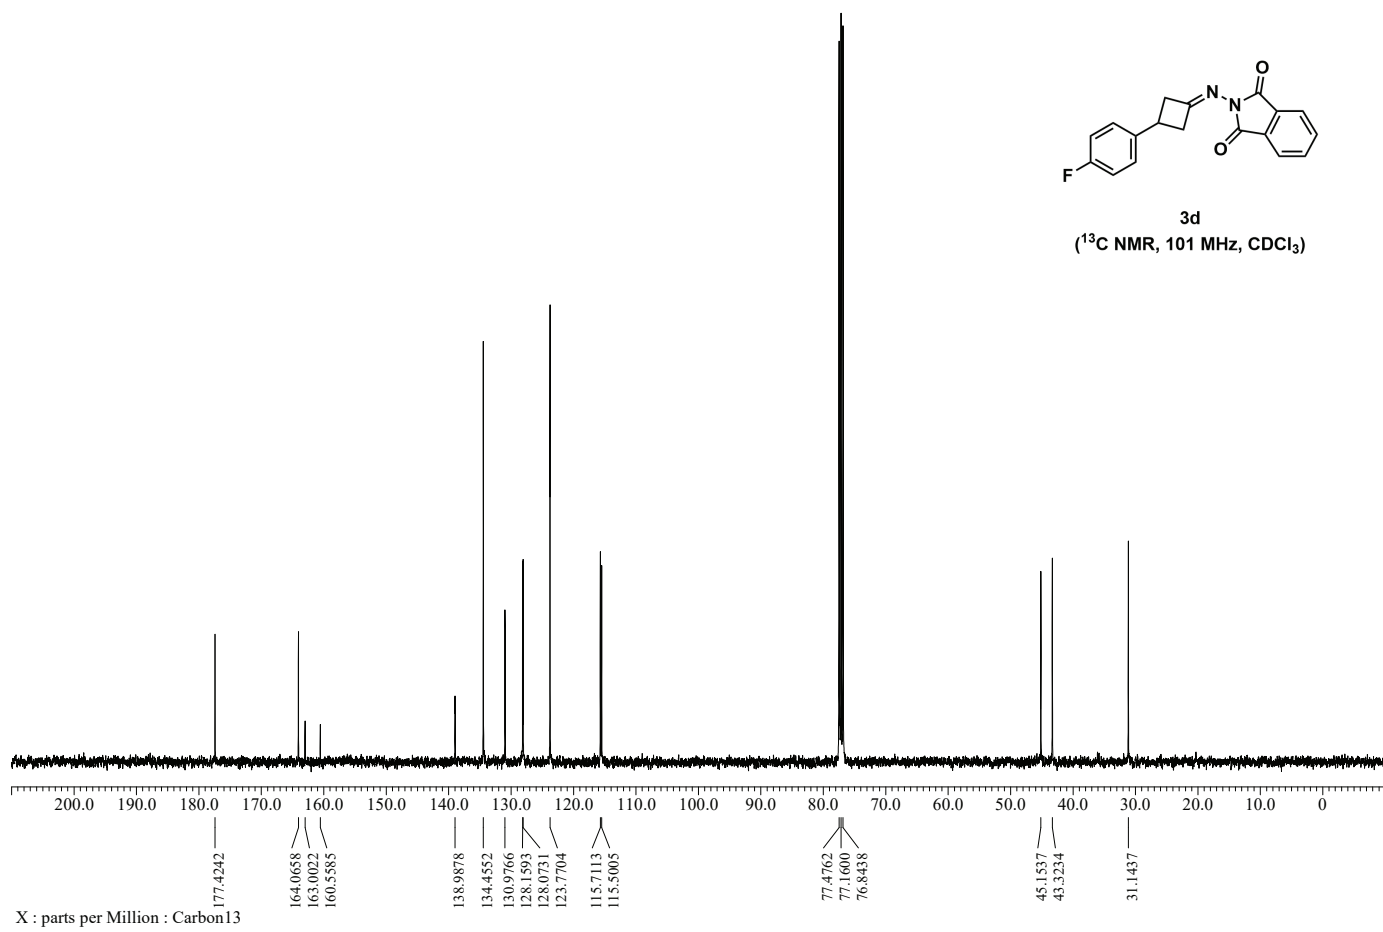

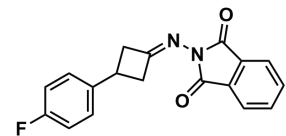

**3d**  
 (<sup>19</sup>F NMR, 373 MHz, CDCl<sub>3</sub>)

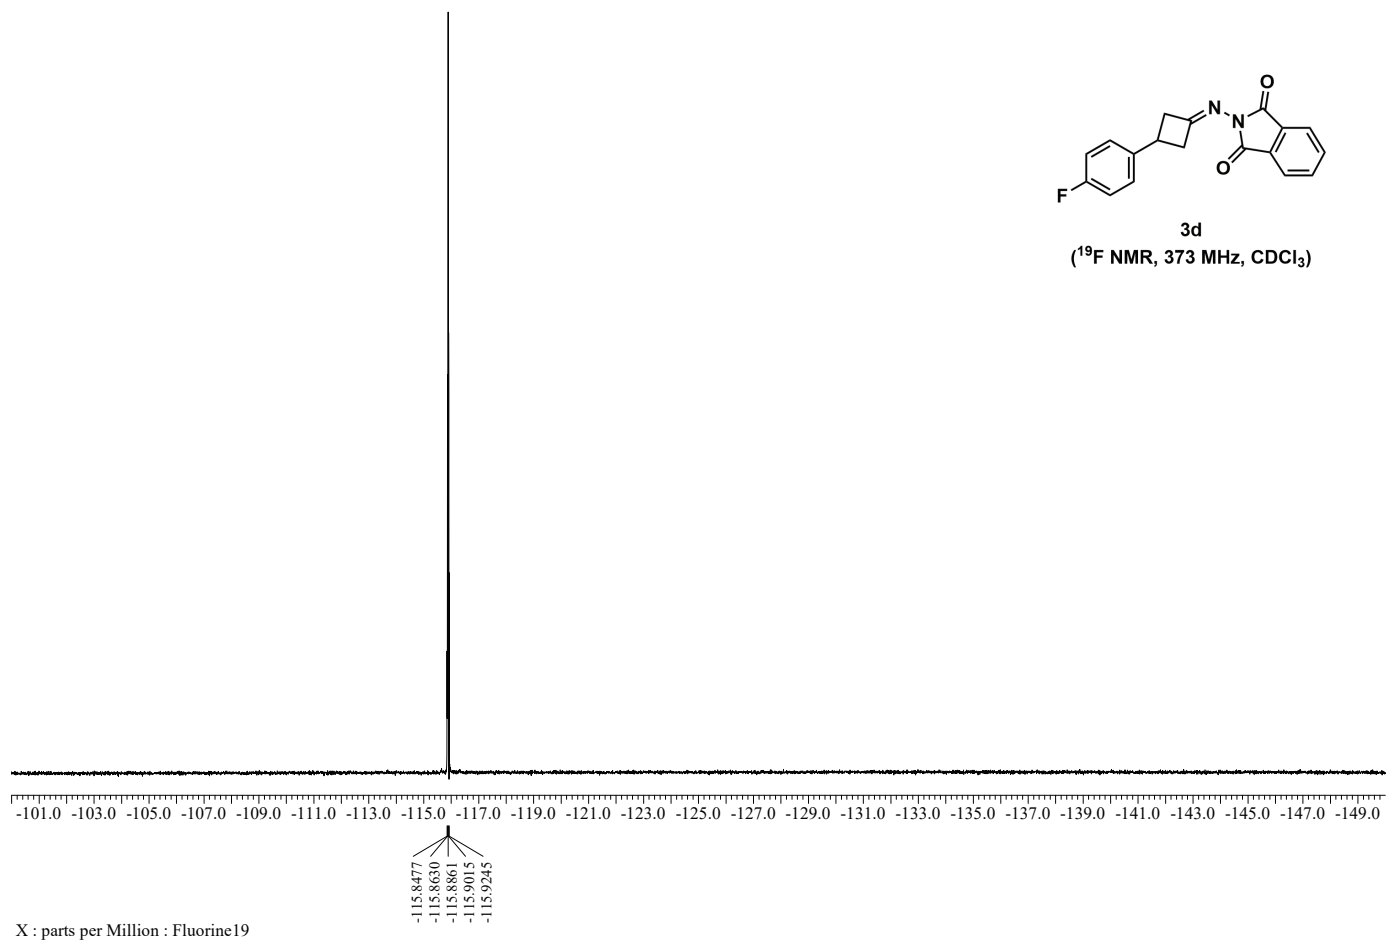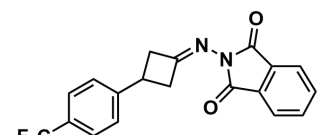

**3e**  
 (<sup>1</sup>H NMR, 400 MHz, CDCl<sub>3</sub>)

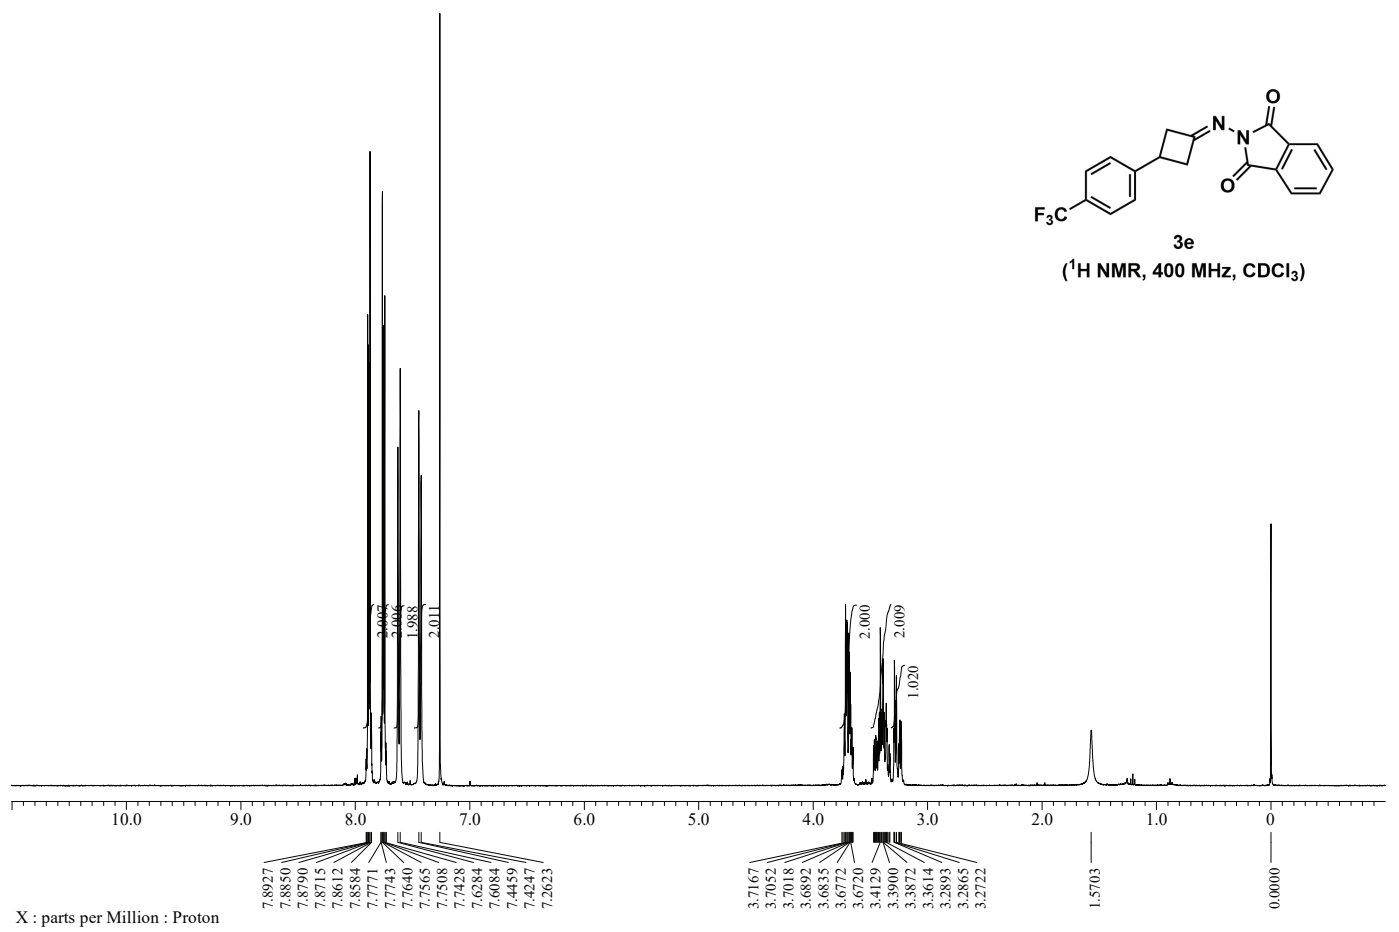

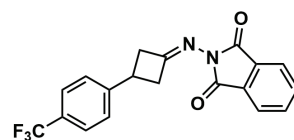

**3e**  
(<sup>13</sup>C NMR, 101 MHz, CDCl<sub>3</sub>)

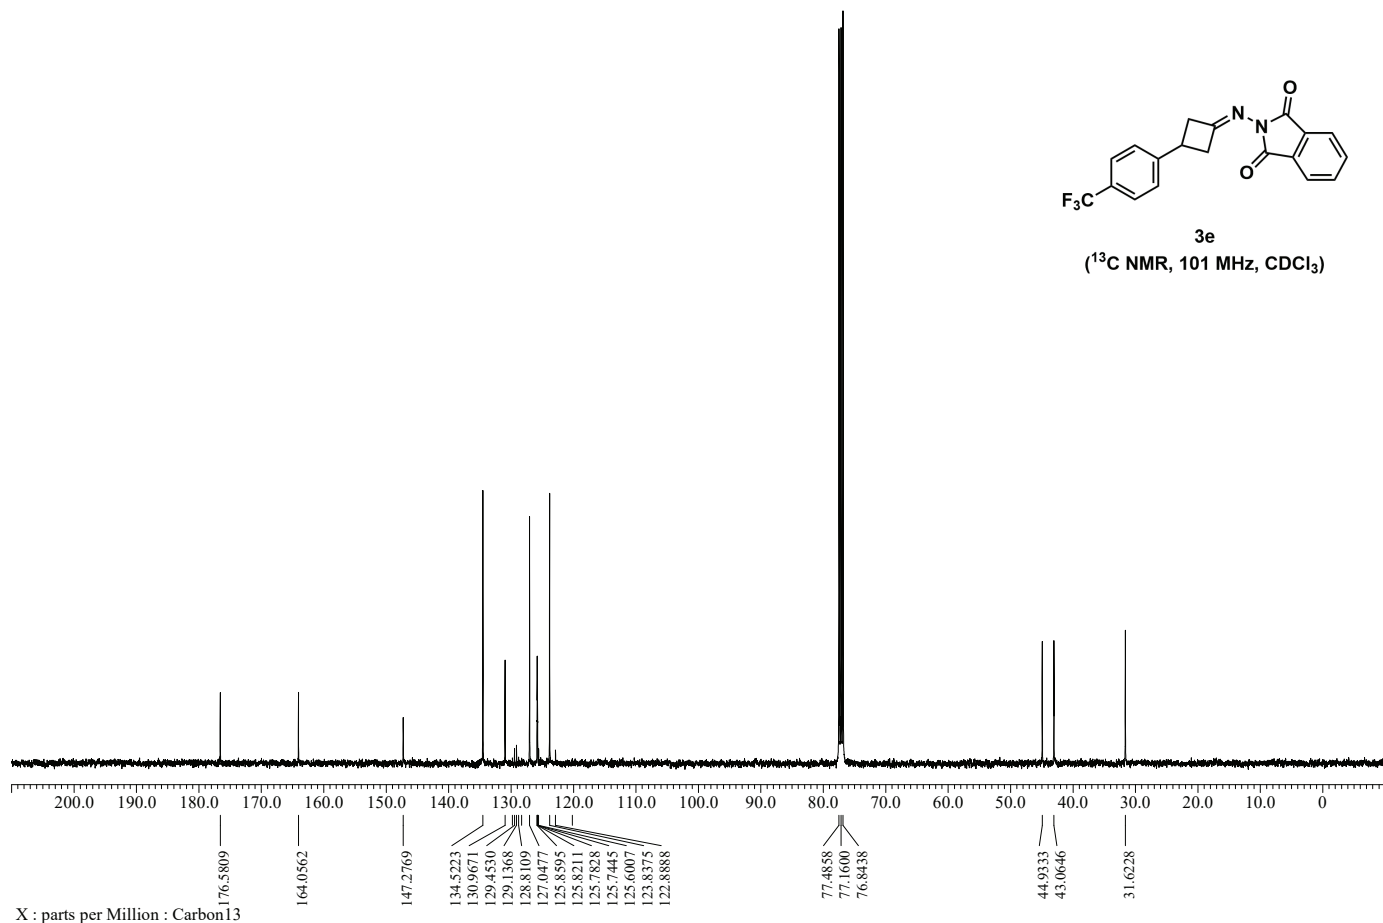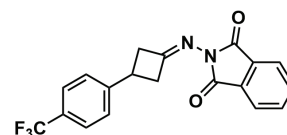

**3e**  
(<sup>19</sup>F NMR, 376 MHz, CDCl<sub>3</sub>)

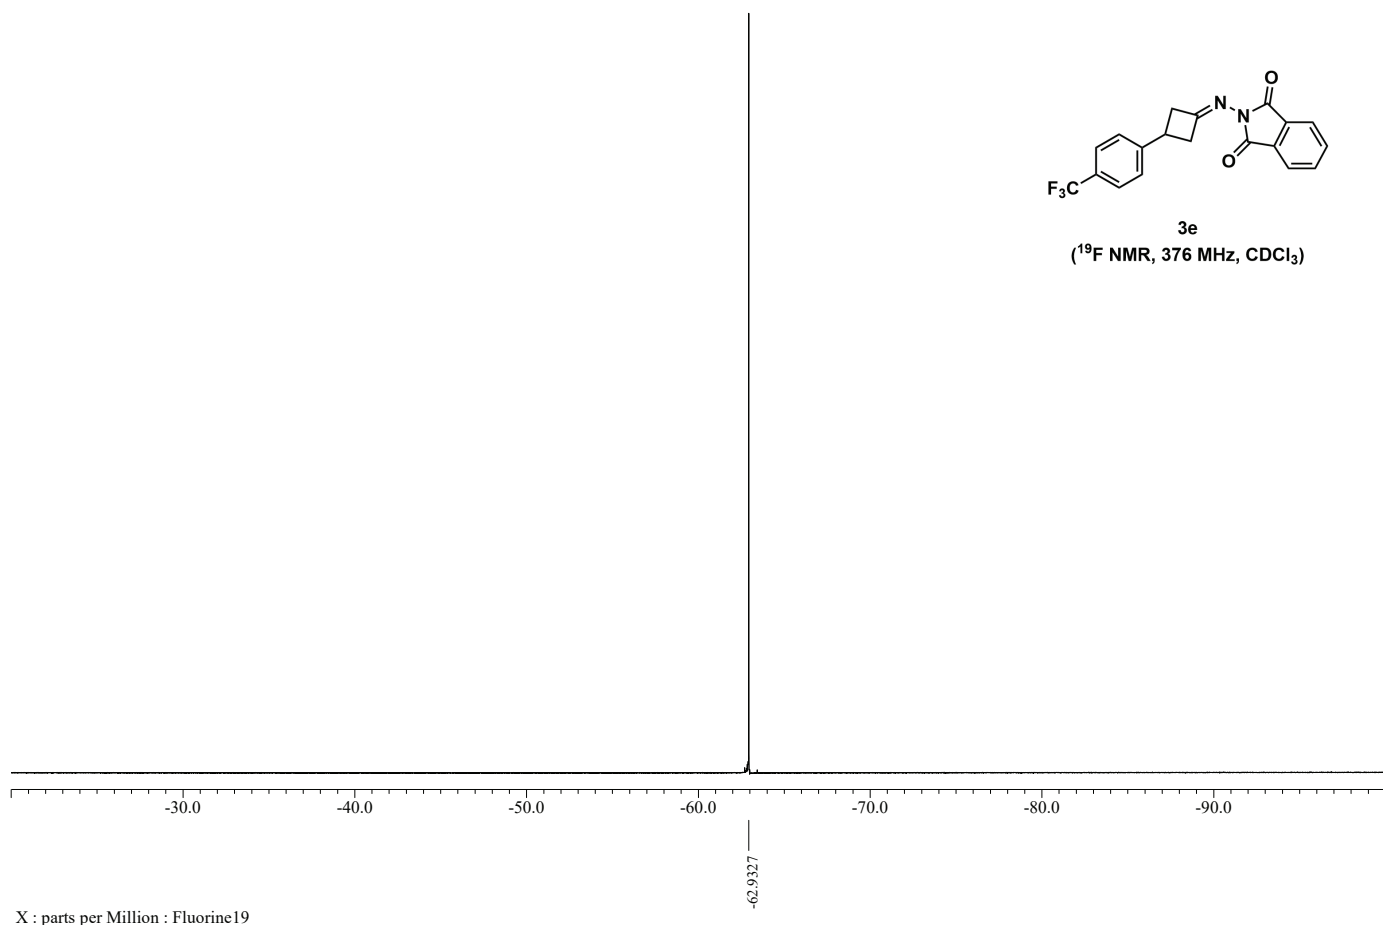

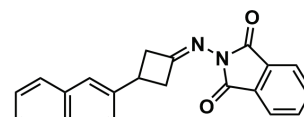

**3f**  
 $(^1\text{H NMR, 400 MHz, CDCl}_3)$

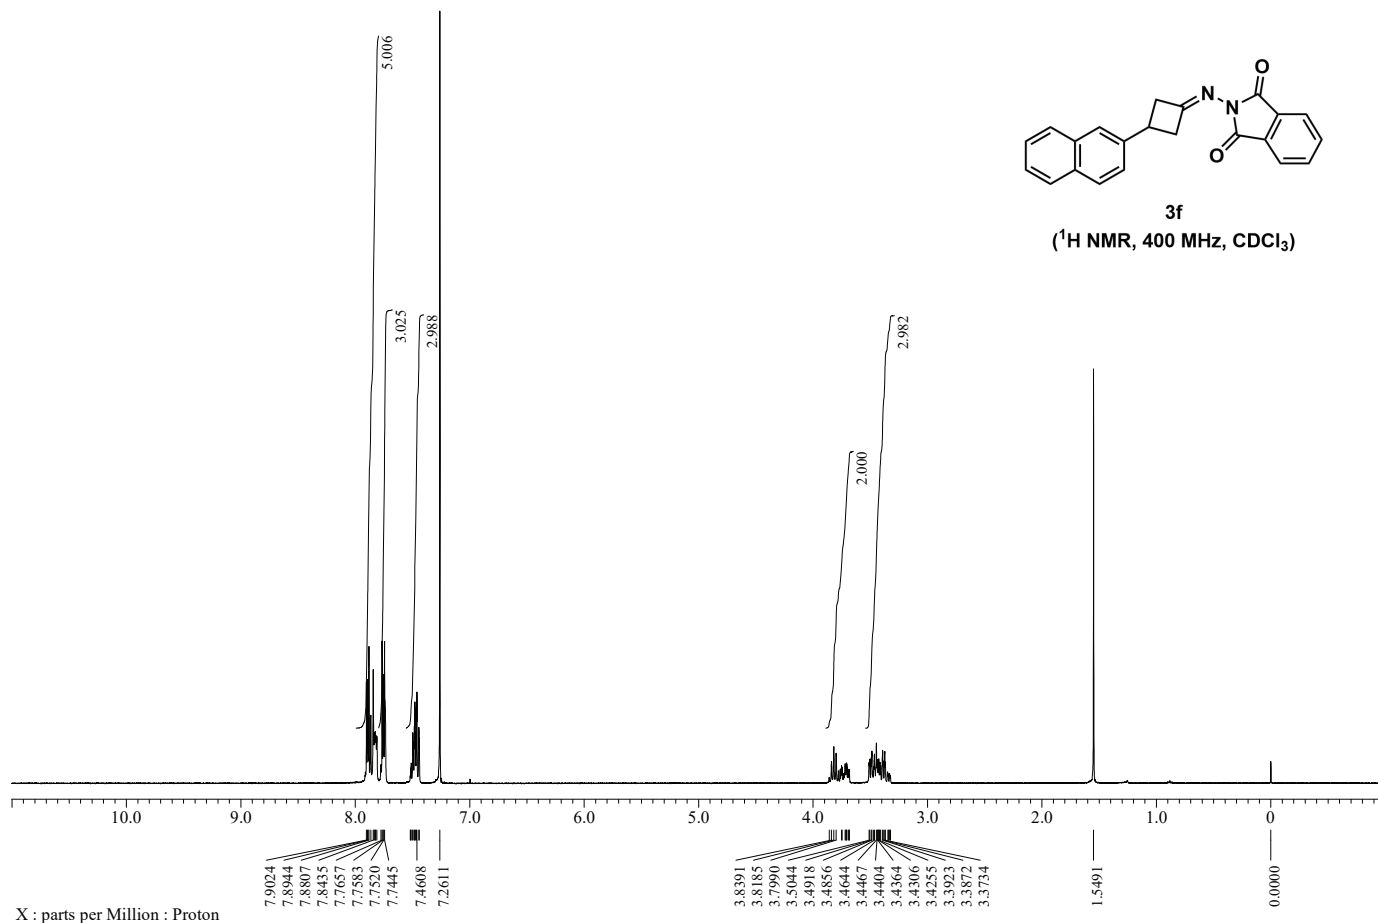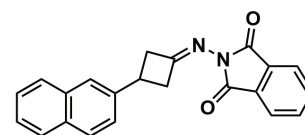

**3f**  
 $(^{13}\text{C NMR, 101 MHz, CDCl}_3)$

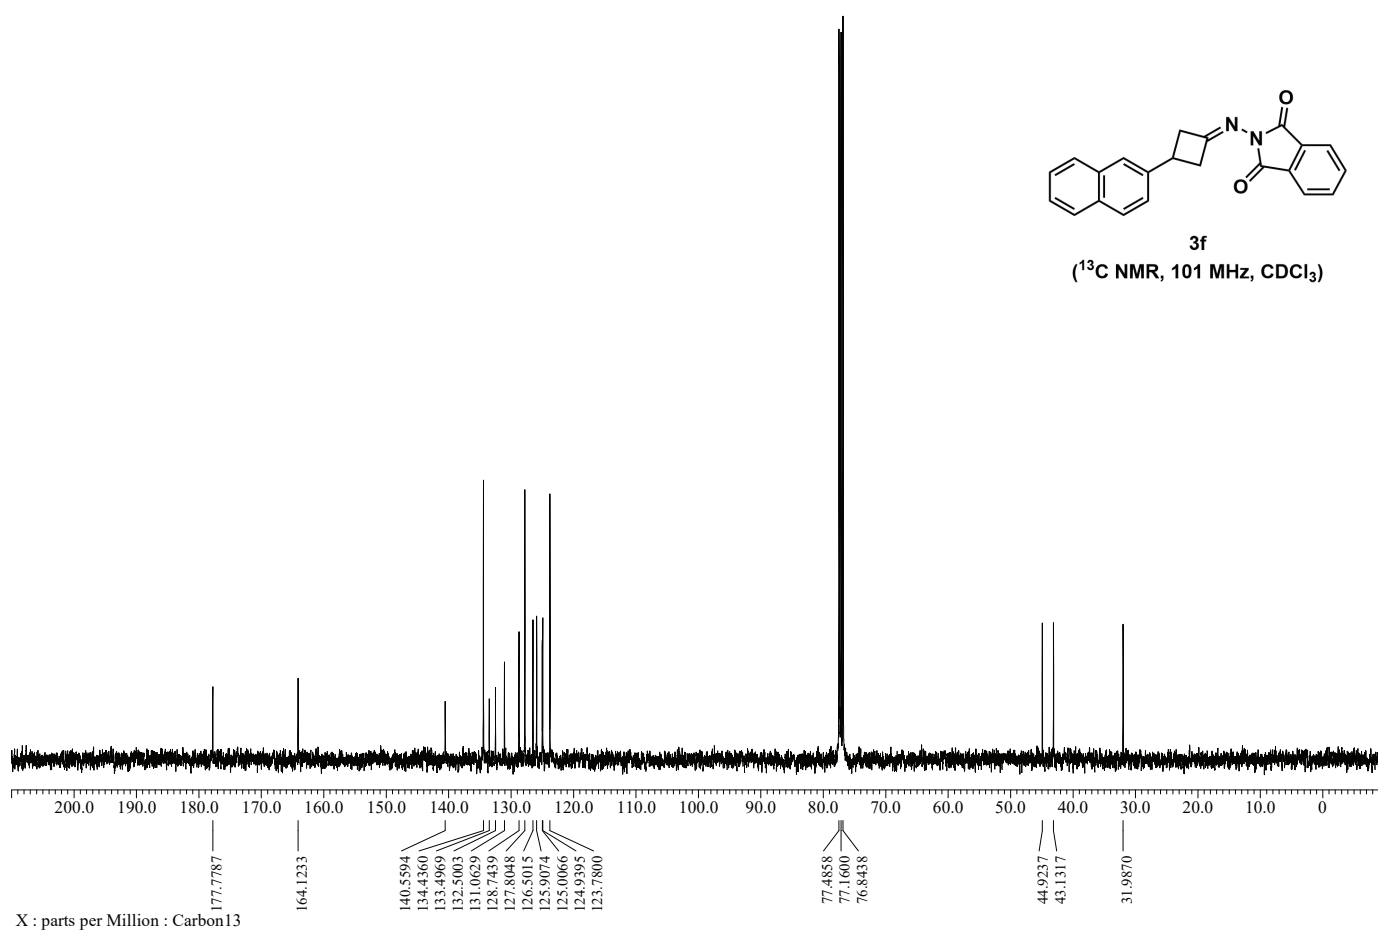

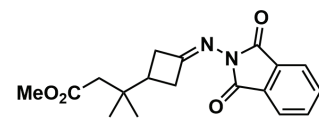

**3g**  
(<sup>1</sup>H NMR, 400 MHz, CDCl<sub>3</sub>)

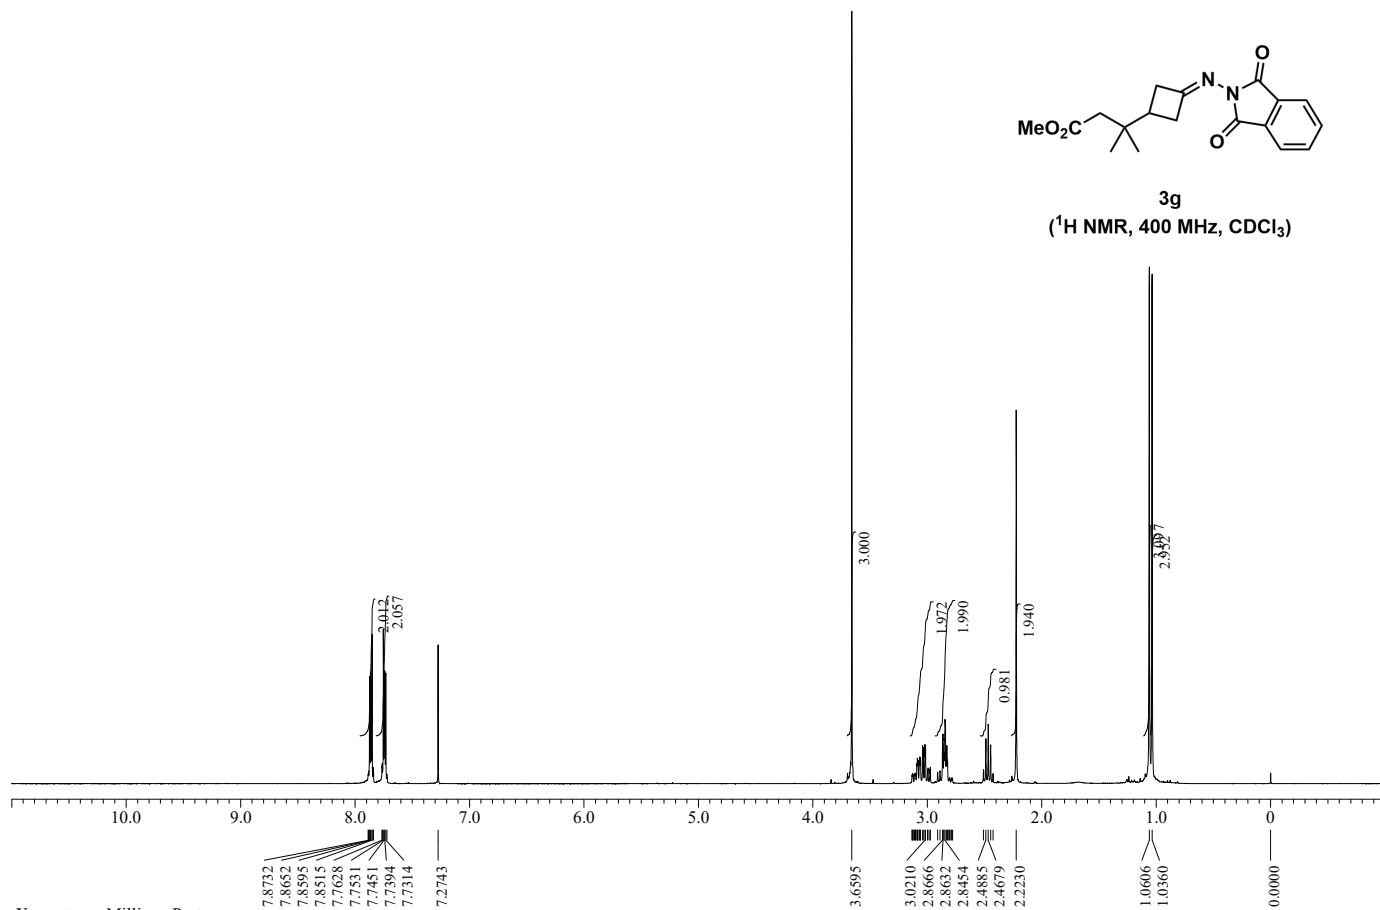

X : parts per Million : Proton

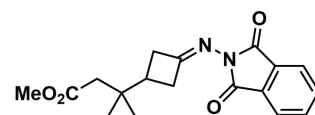

**3g**  
(<sup>13</sup>C NMR, 101 MHz, CDCl<sub>3</sub>)

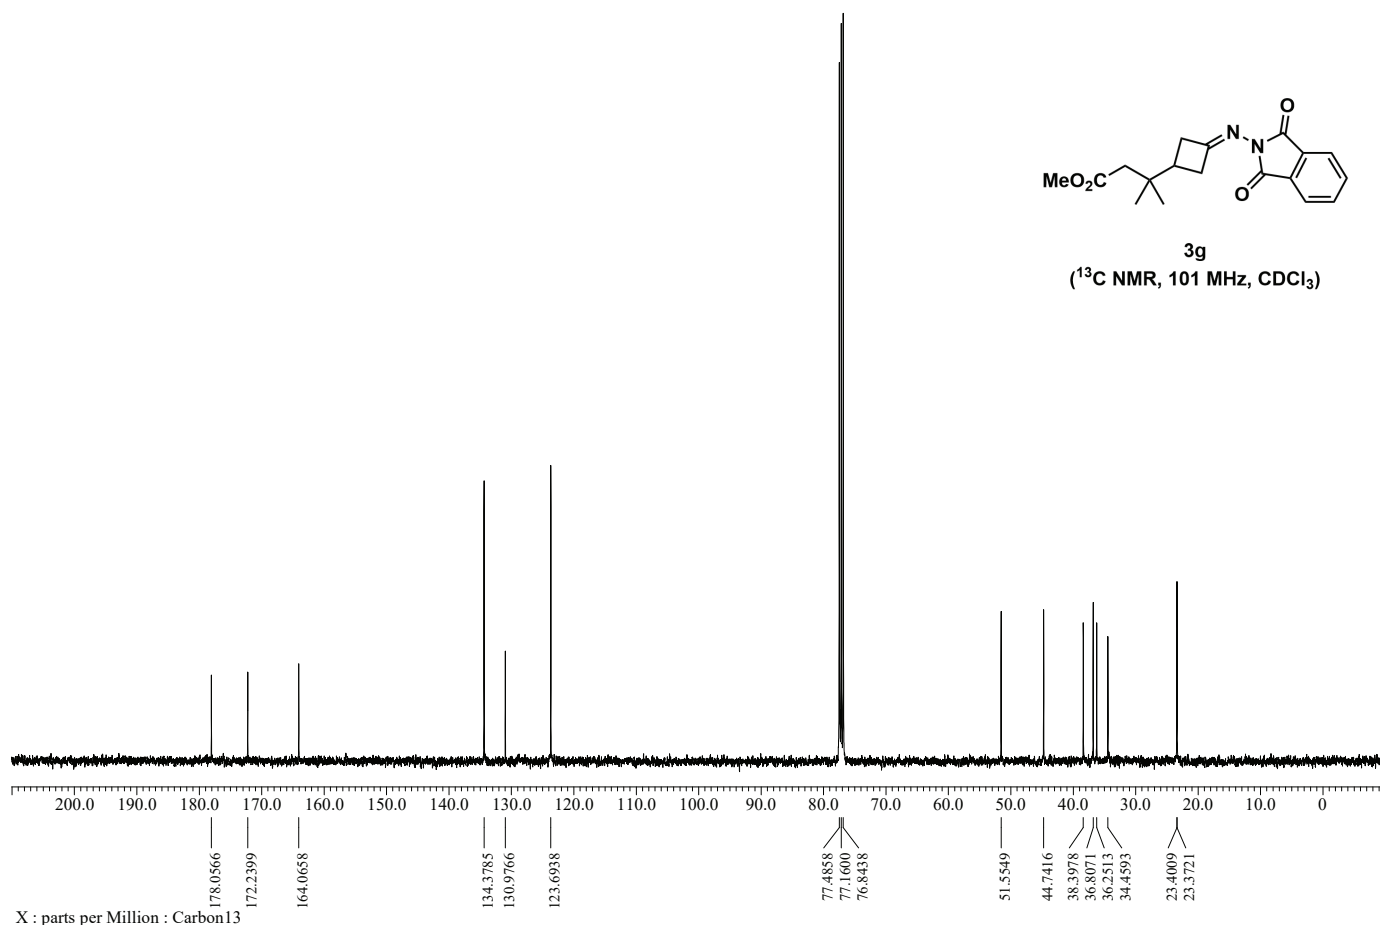

X : parts per Million : Carbon13

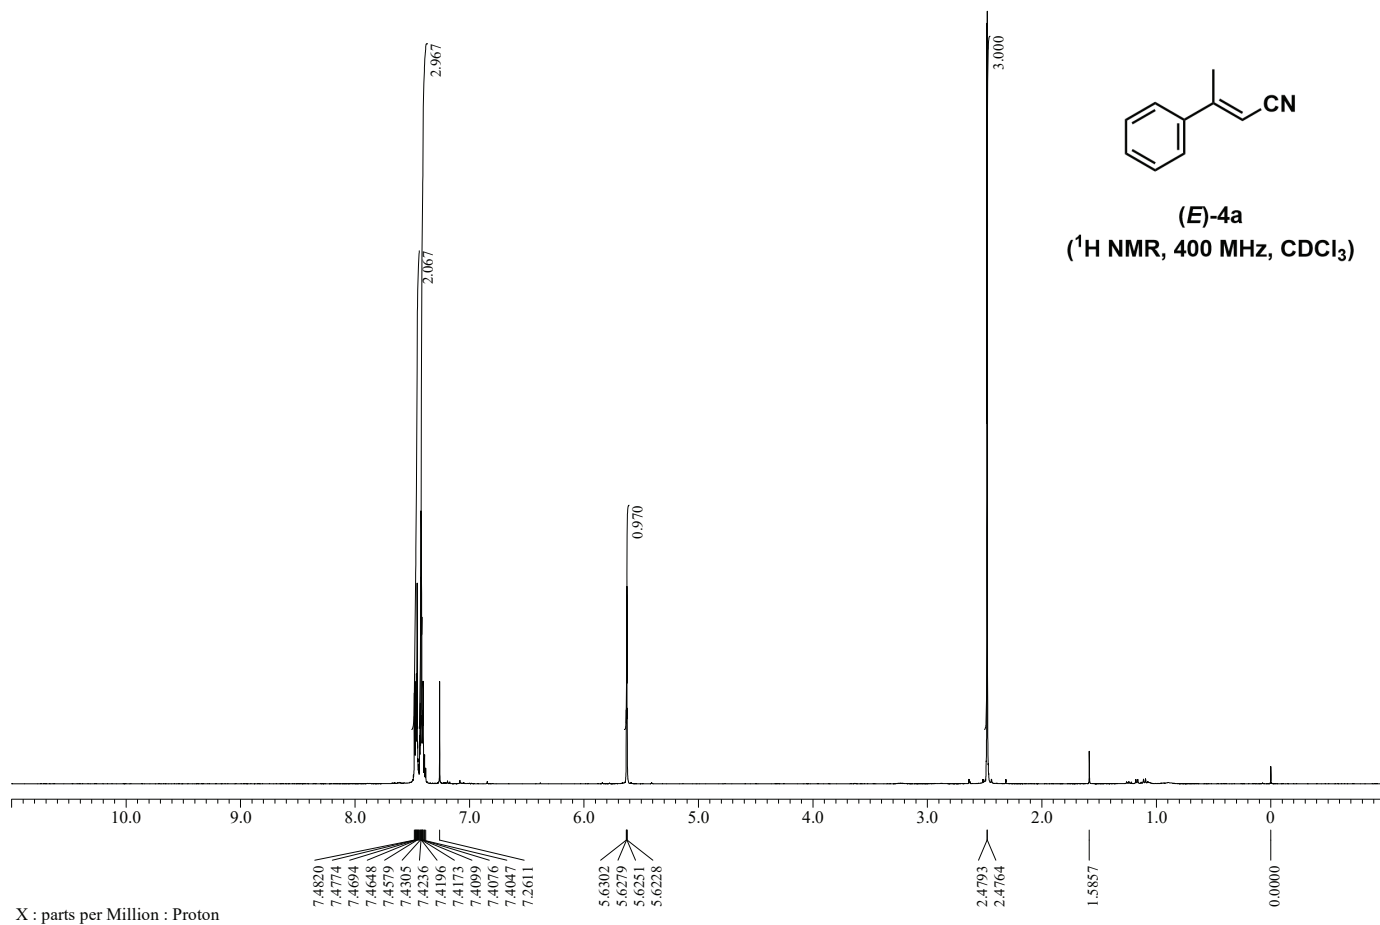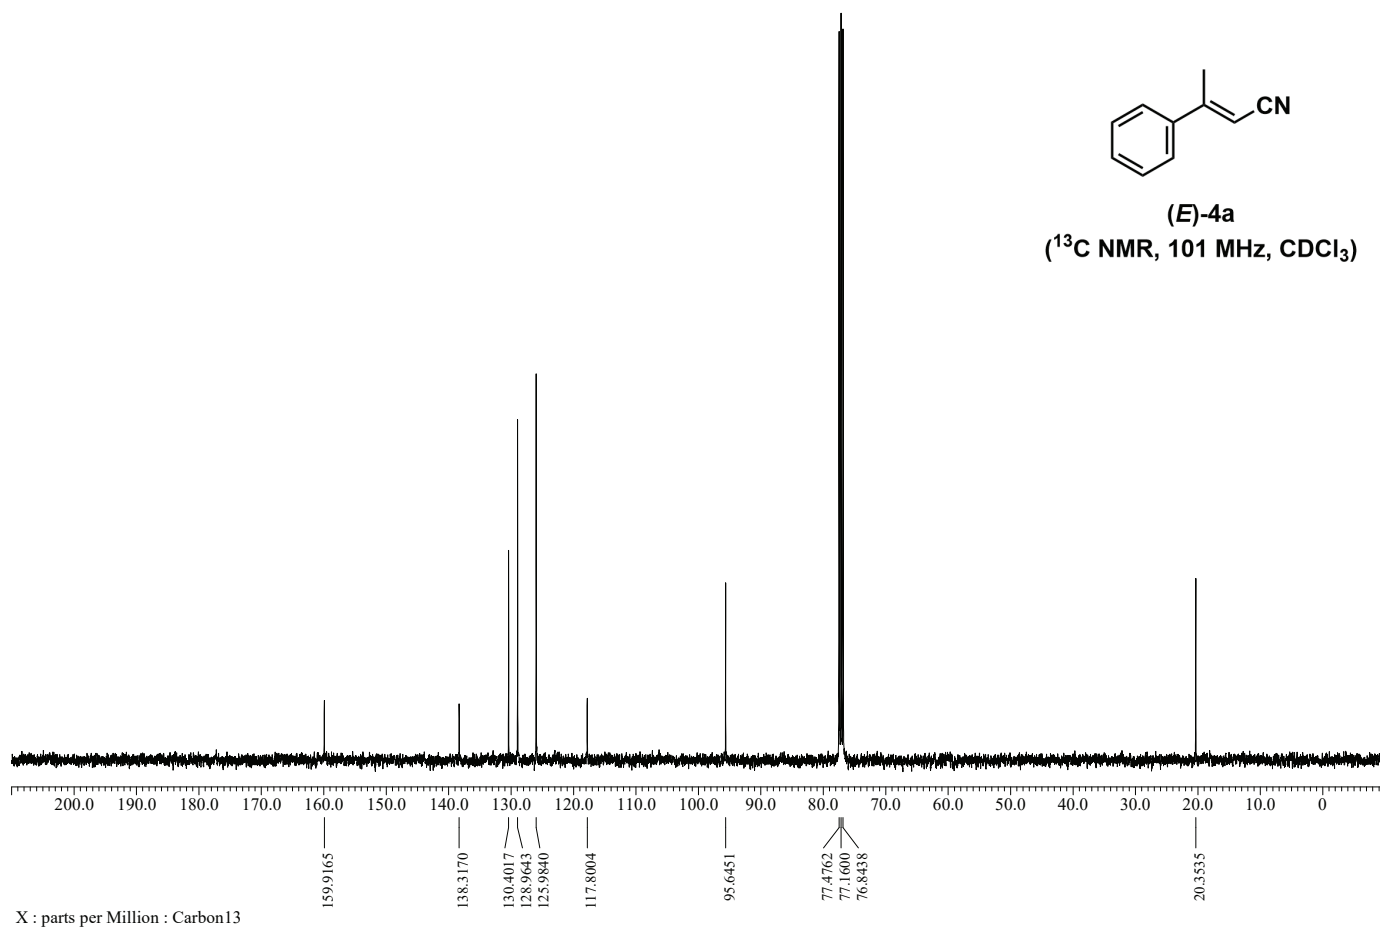

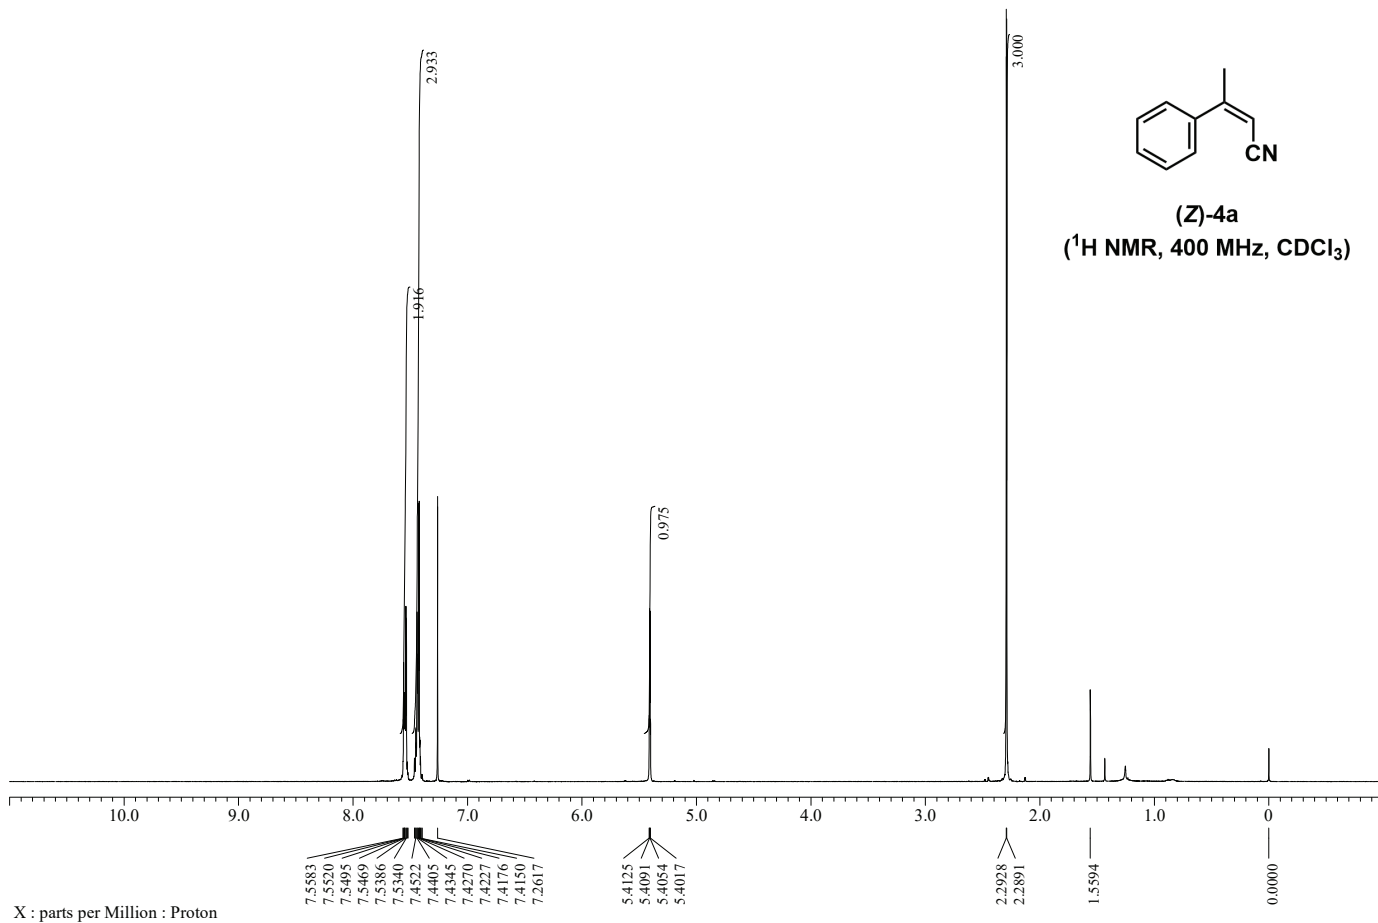

X : parts per Million : Proton

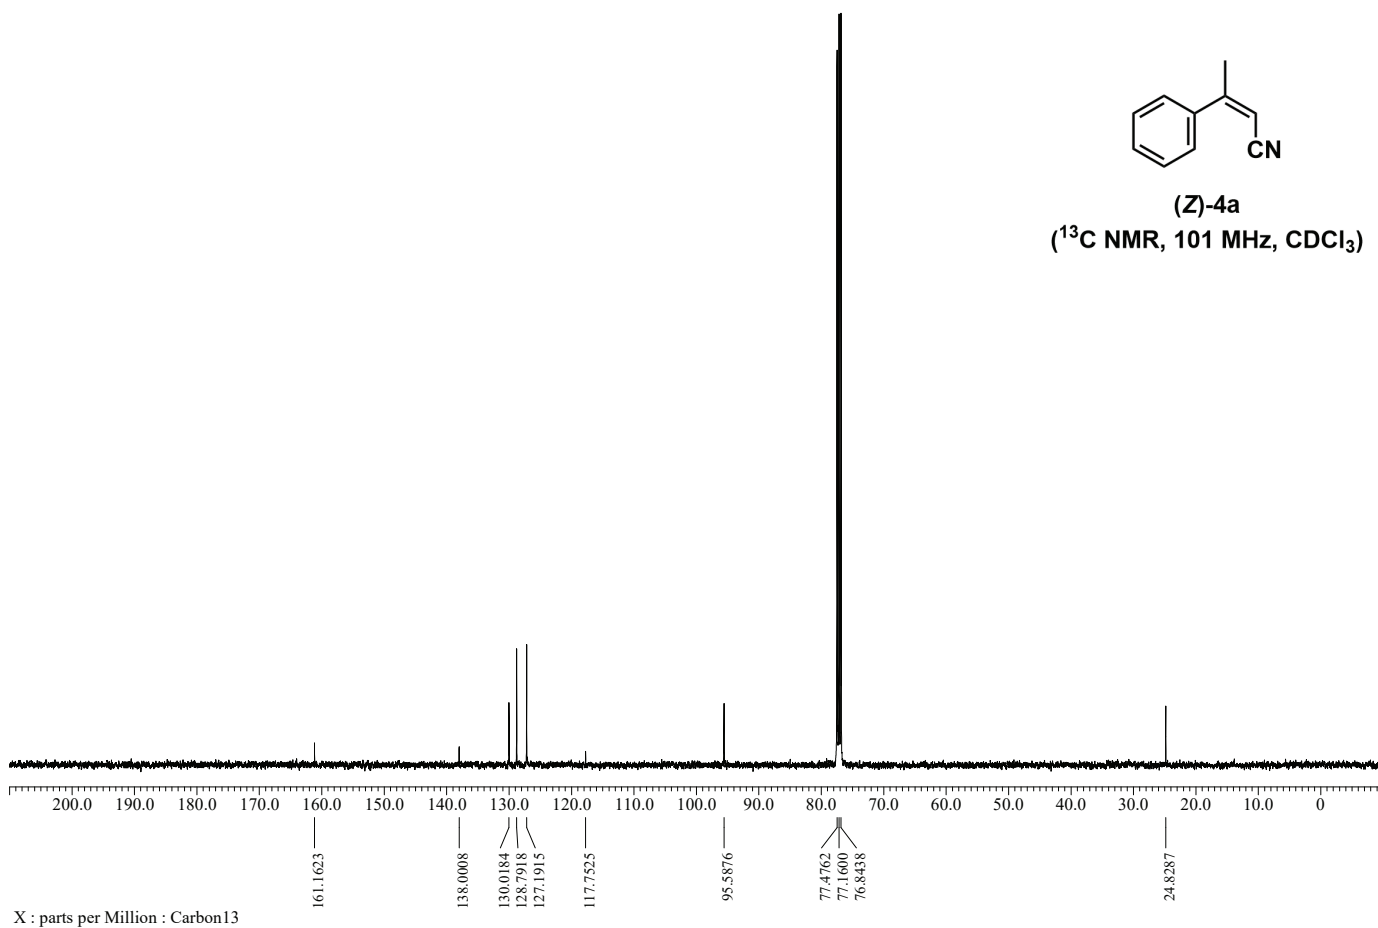

X : parts per Million : Carbon13



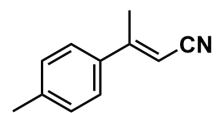

(E)-4b  
(<sup>1</sup>H NMR, 400 MHz, CDCl<sub>3</sub>)

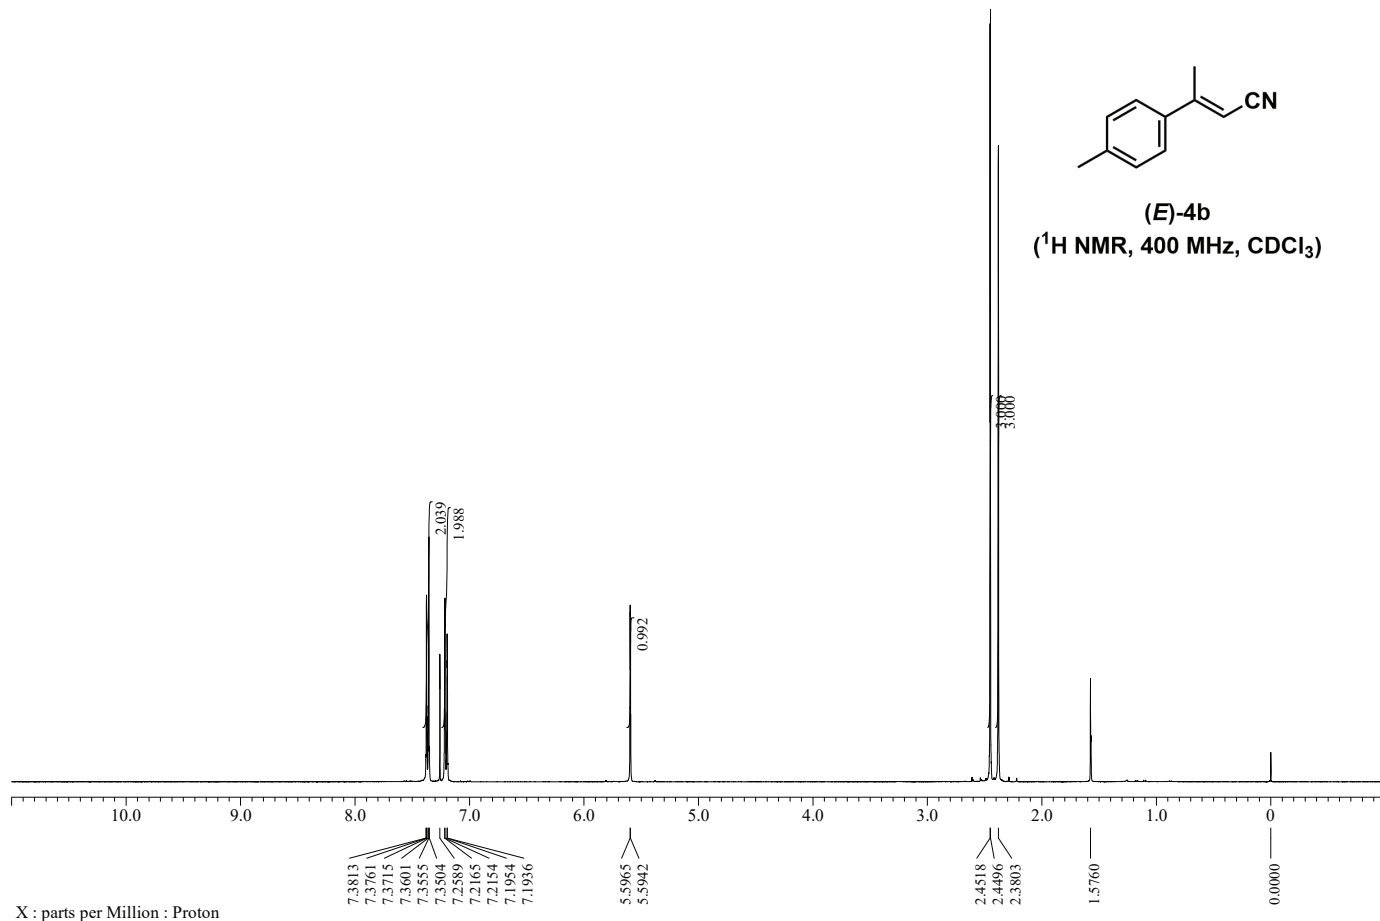

X : parts per Million : Proton

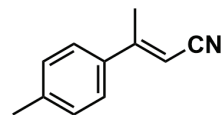

(E)-4b  
(<sup>13</sup>C NMR, 101 MHz, CDCl<sub>3</sub>)

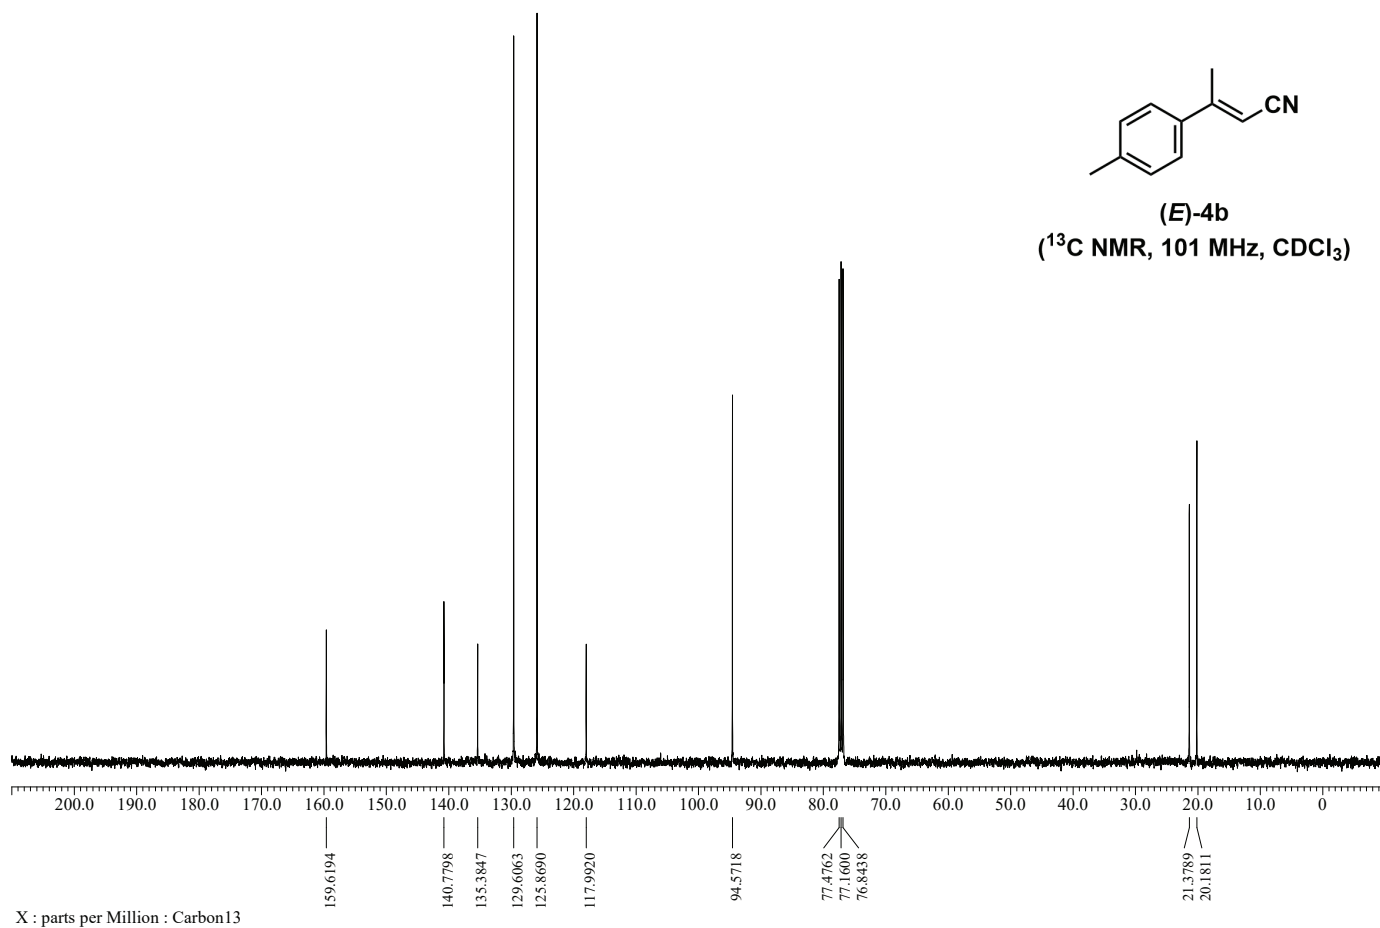

X : parts per Million : Carbon13

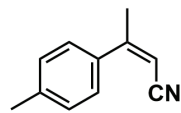

(Z)-4b  
 (<sup>1</sup>H NMR, 400 MHz, CDCl<sub>3</sub>)

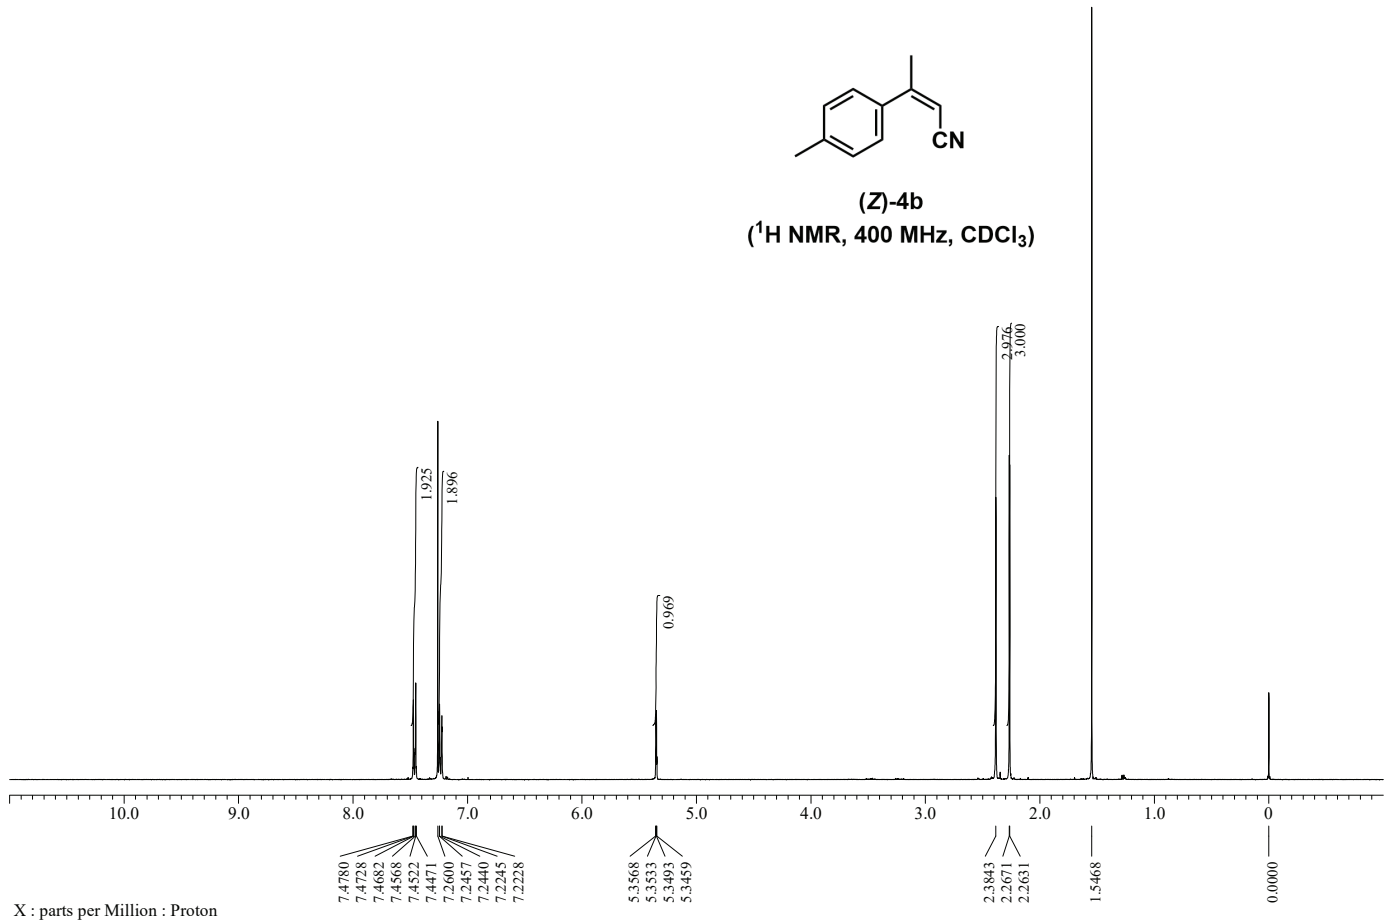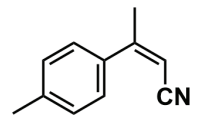

(Z)-4b  
 (<sup>13</sup>C NMR, 101 MHz, CDCl<sub>3</sub>)

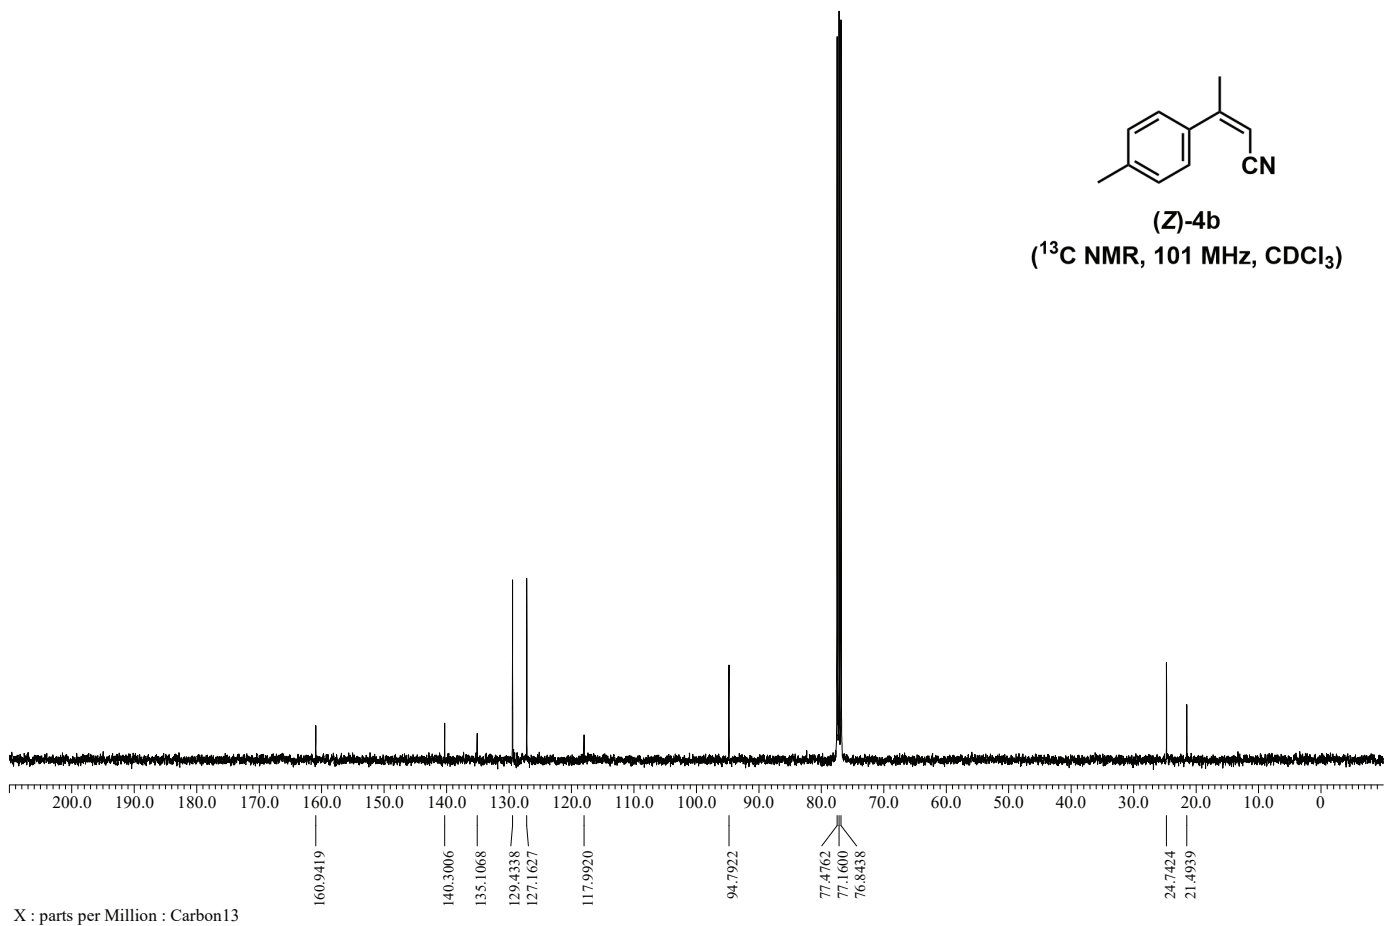

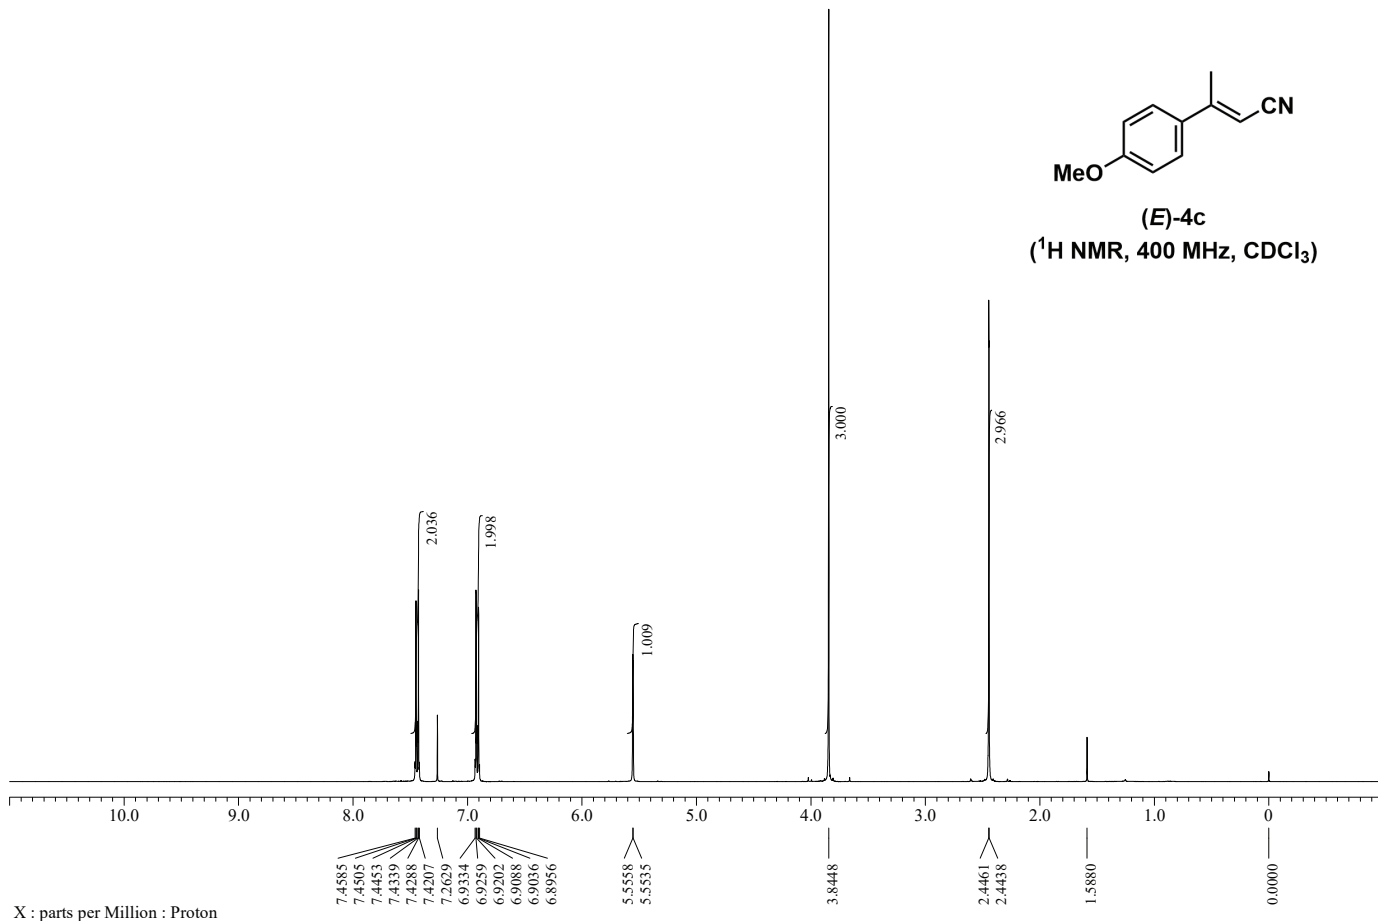

X : parts per Million : Proton

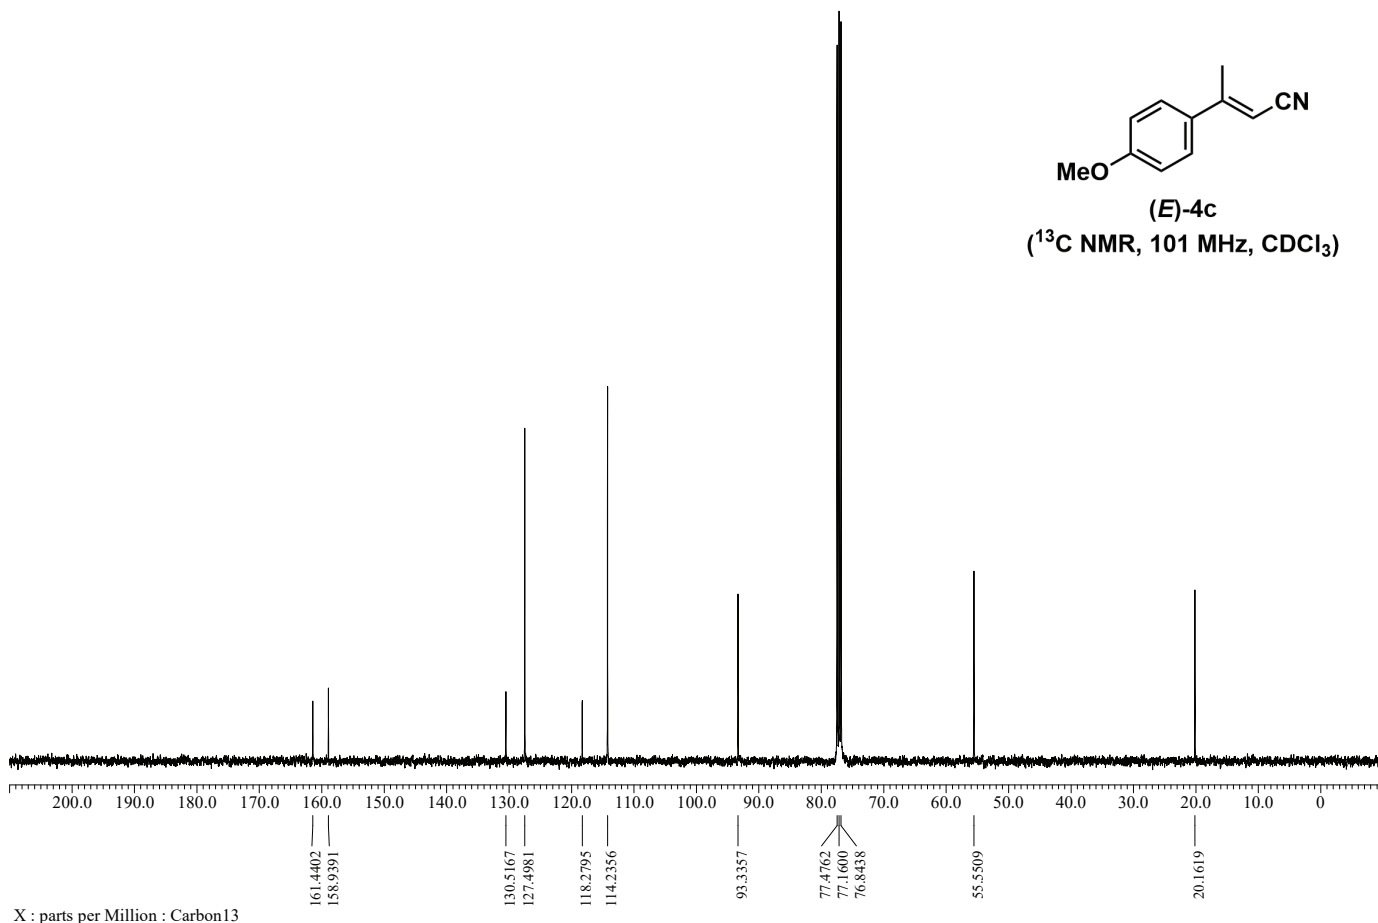

X : parts per Million : Carbon13

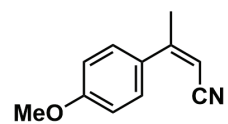

(Z)-4c  
(<sup>1</sup>H NMR, 400 MHz, CDCl<sub>3</sub>)

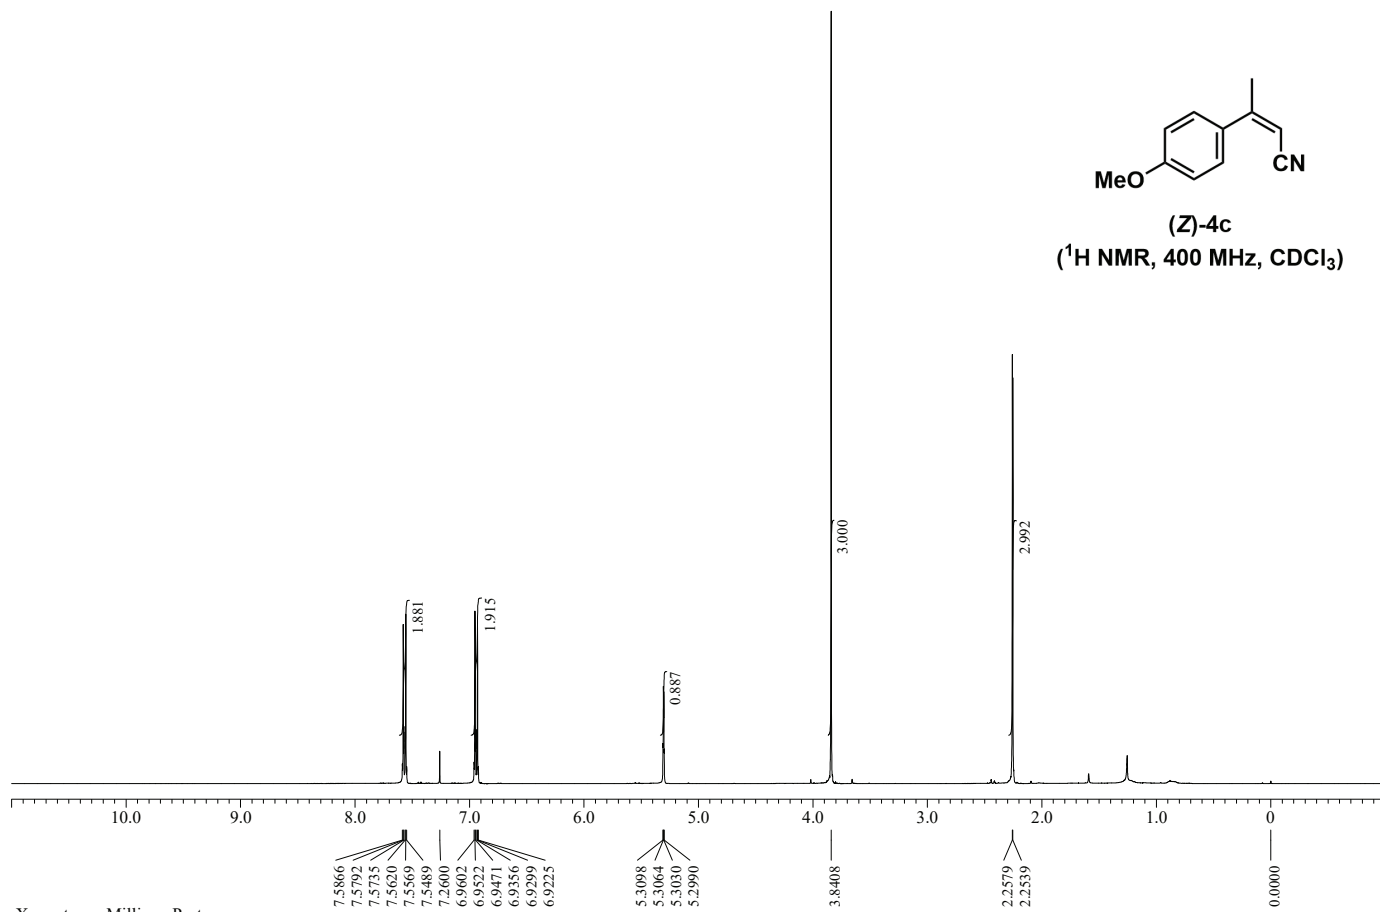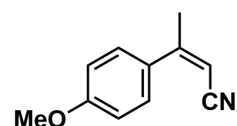

(Z)-4c  
(<sup>13</sup>C NMR, 101 MHz, CDCl<sub>3</sub>)

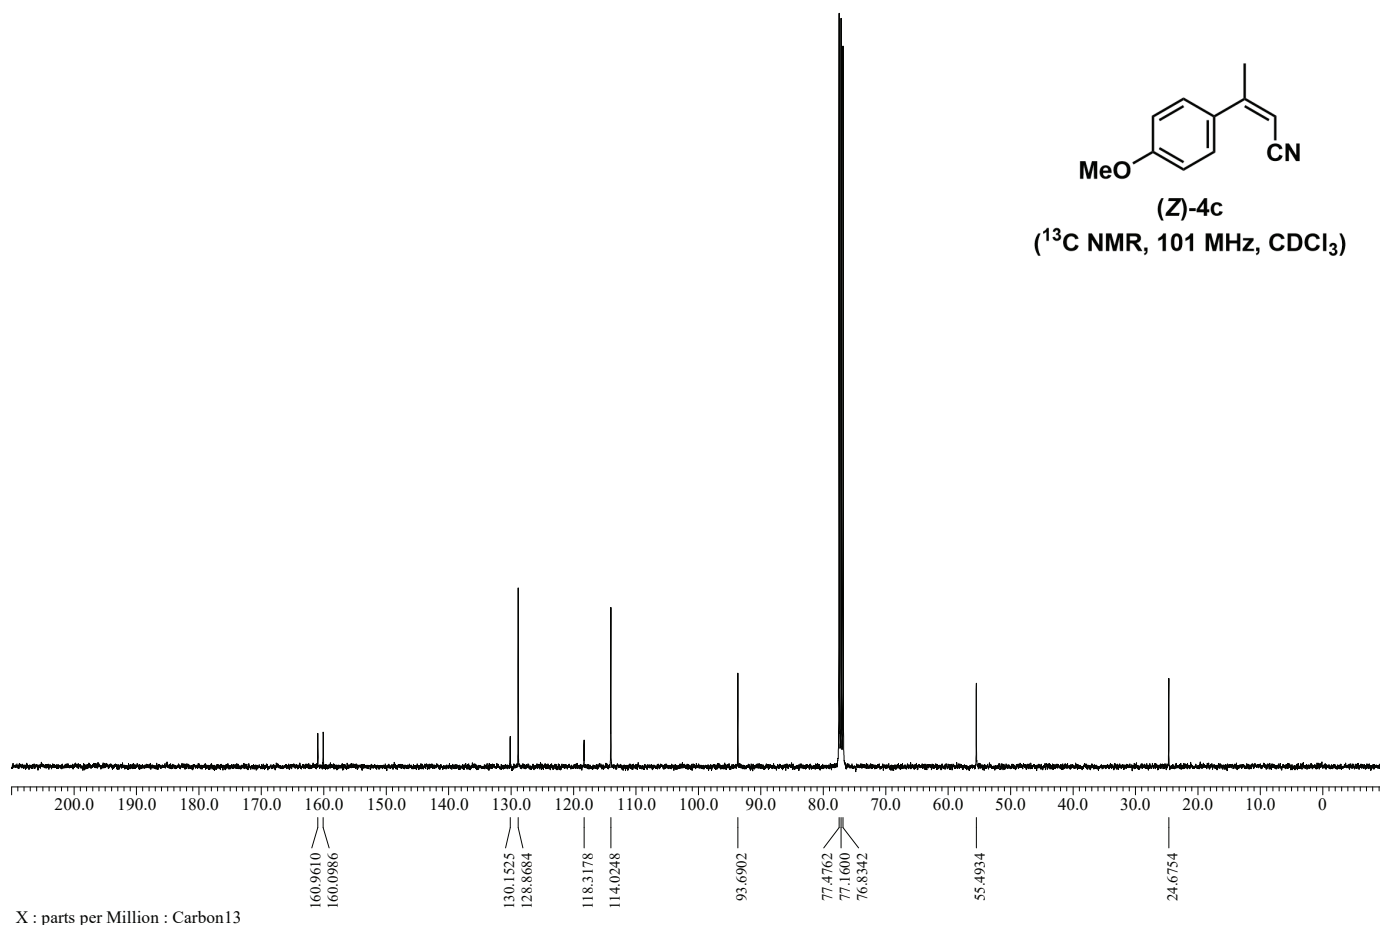

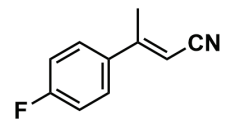

(E)-4d

(<sup>1</sup>H NMR, 400 MHz, CDCl<sub>3</sub>)

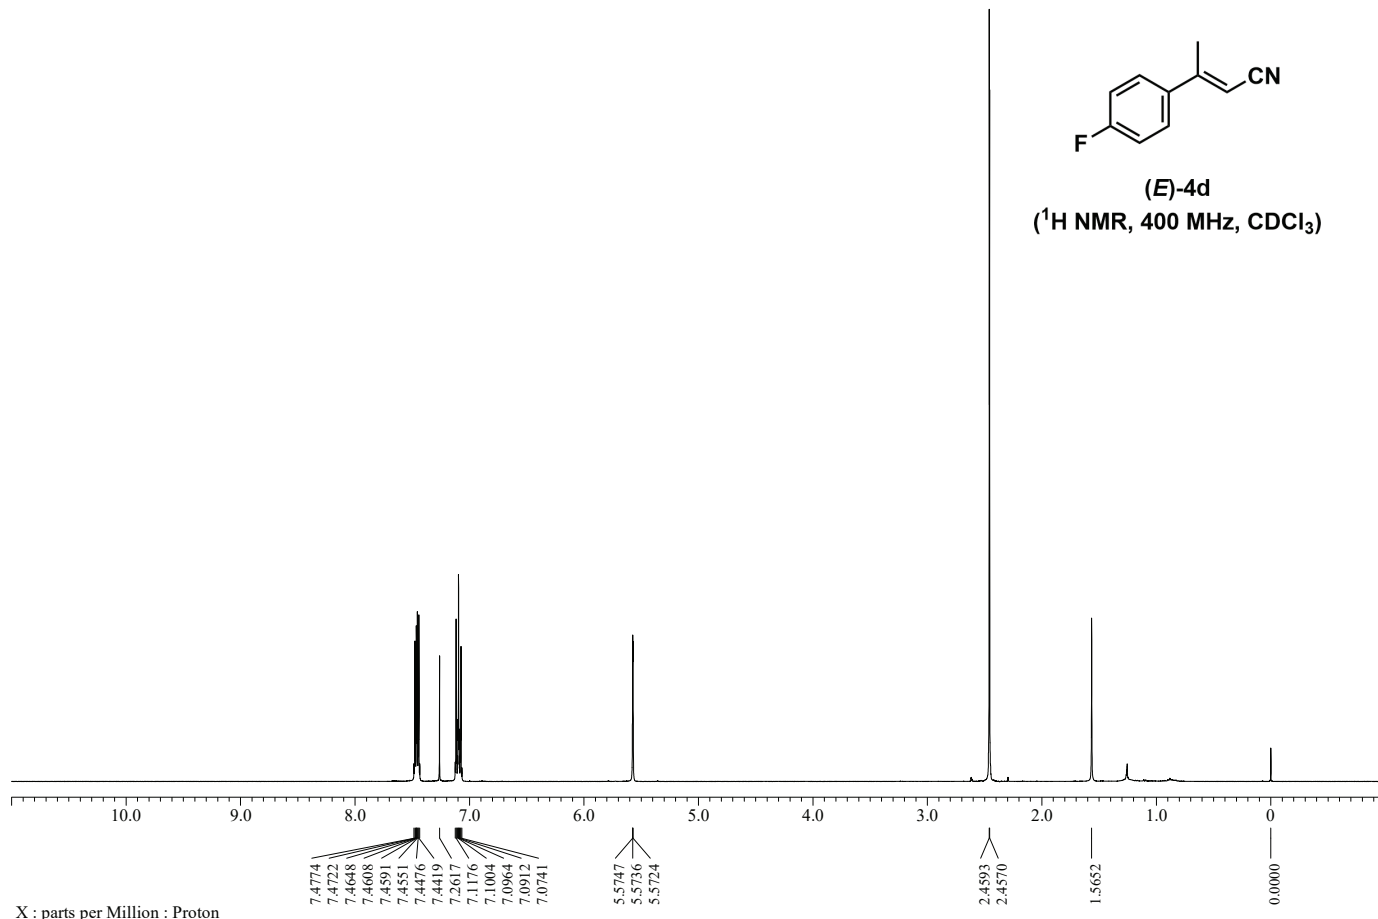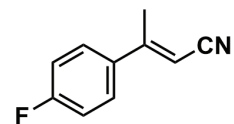

(E)-4d

(<sup>13</sup>C NMR, 101 MHz, CDCl<sub>3</sub>)

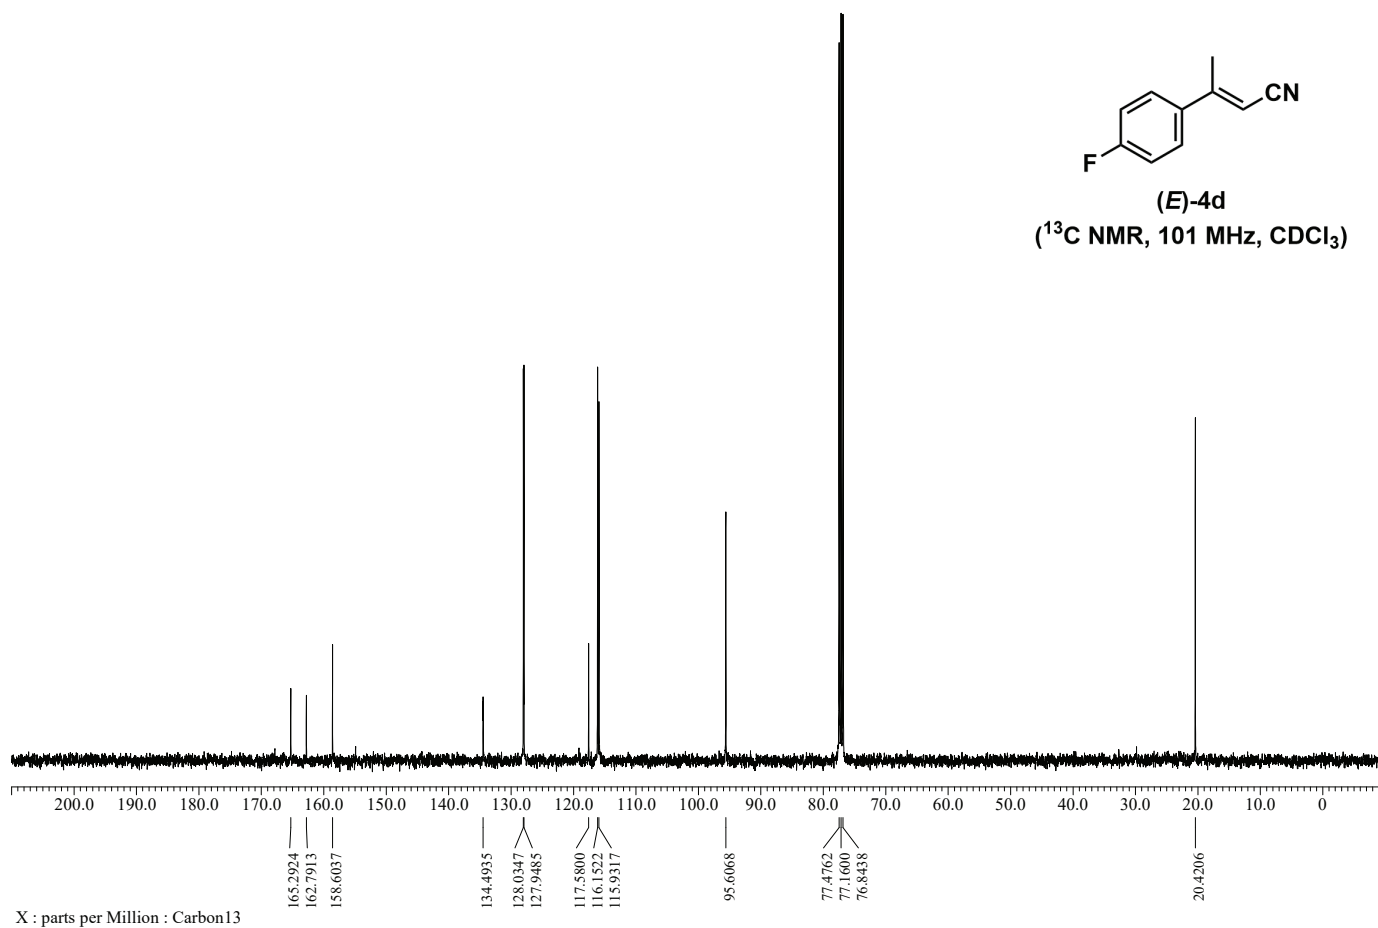

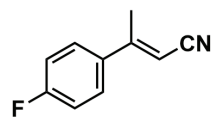

(E)-4d  
(<sup>19</sup>F NMR, 376 MHz, CDCl<sub>3</sub>)

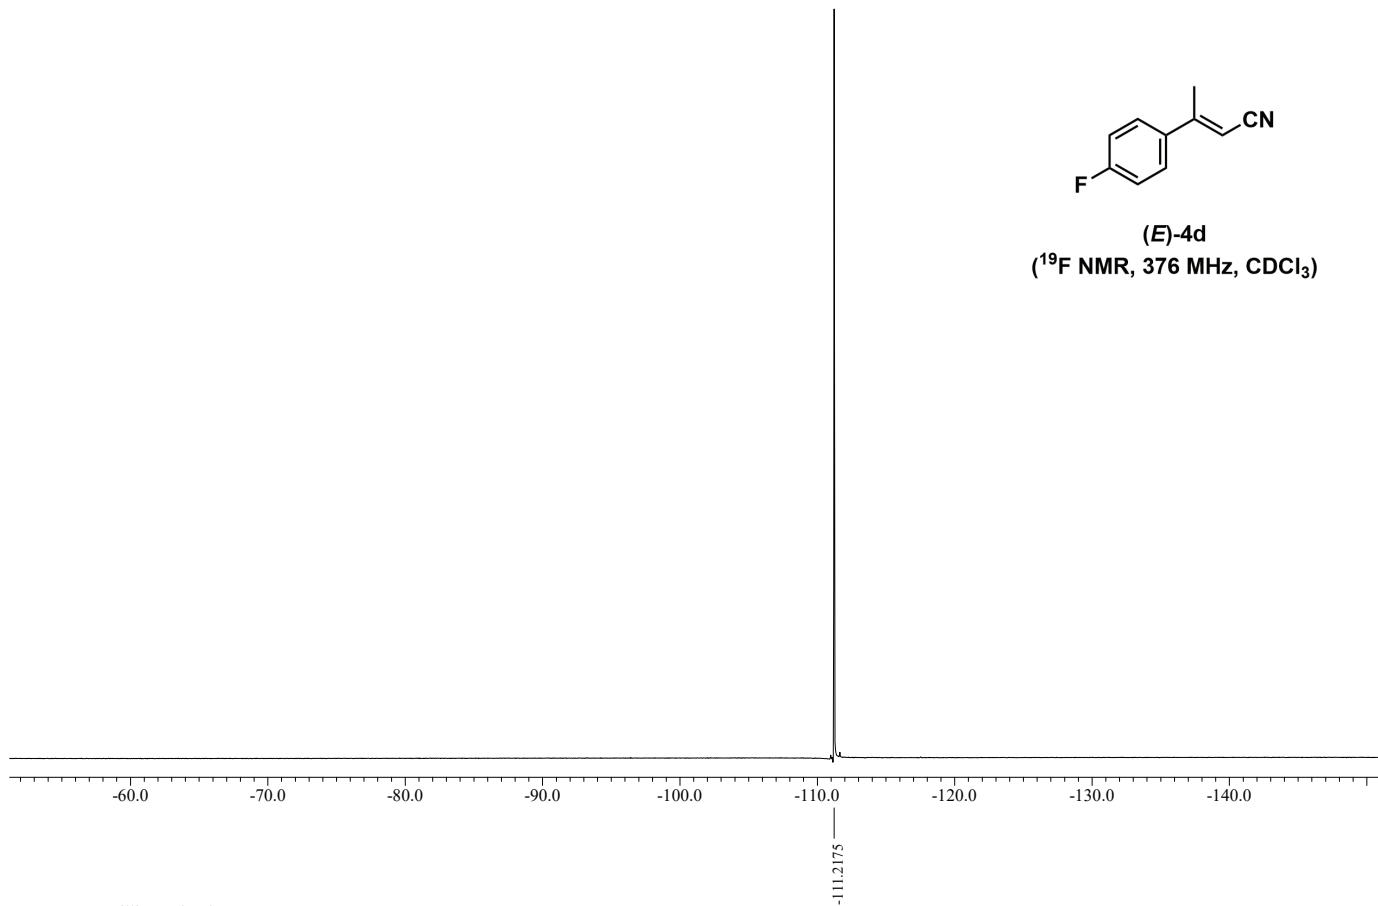

X : parts per Million : Fluorine19

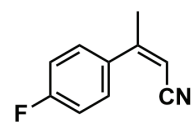

(Z)-4d  
(<sup>1</sup>H NMR, 400 MHz, CDCl<sub>3</sub>)

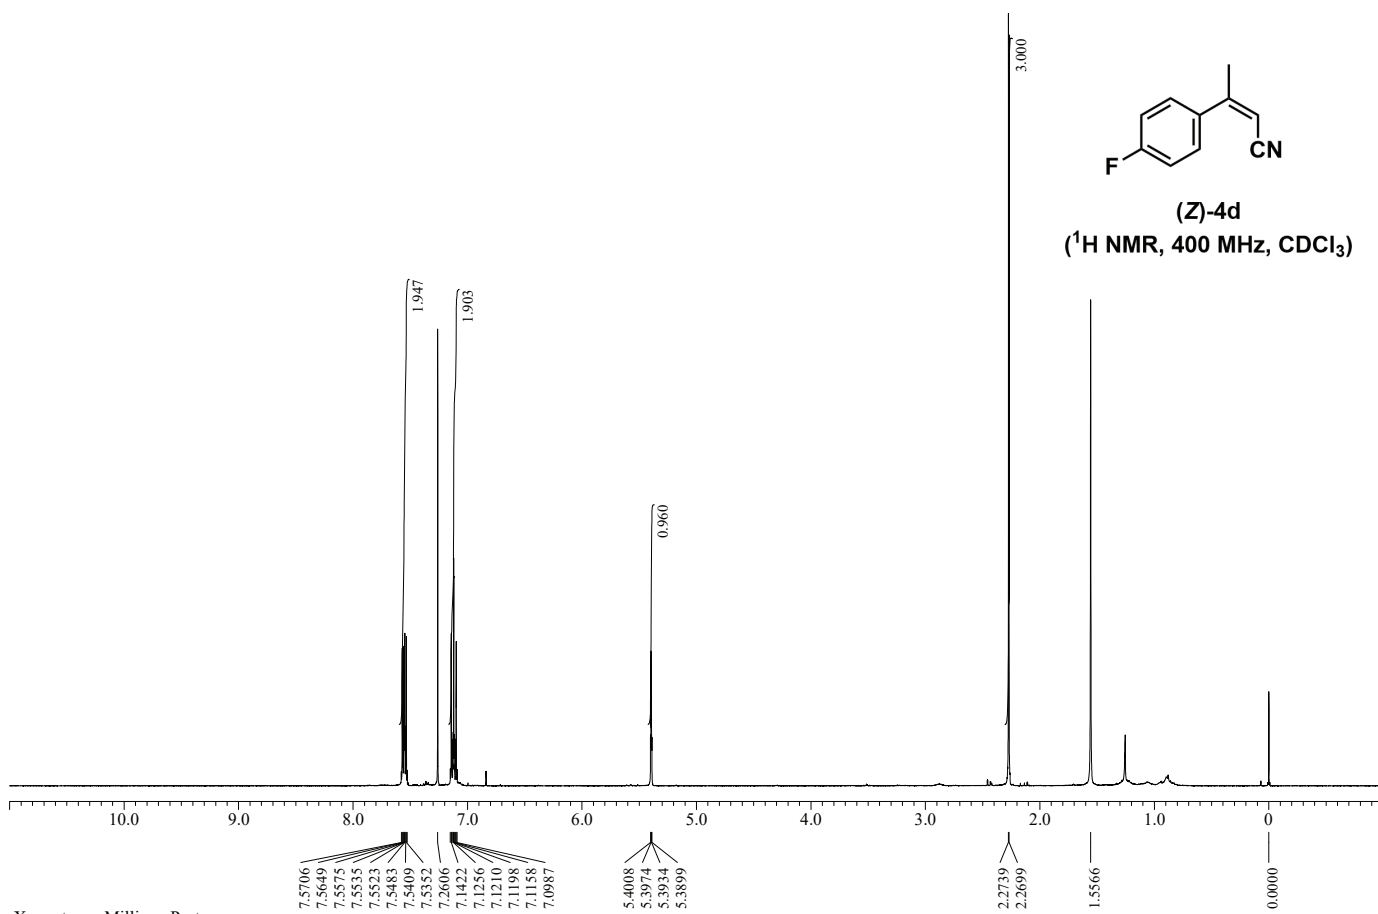

X : parts per Million : Proton

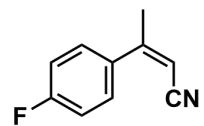

(Z)-4d  
(<sup>13</sup>C NMR, 101 MHz, CDCl<sub>3</sub>)

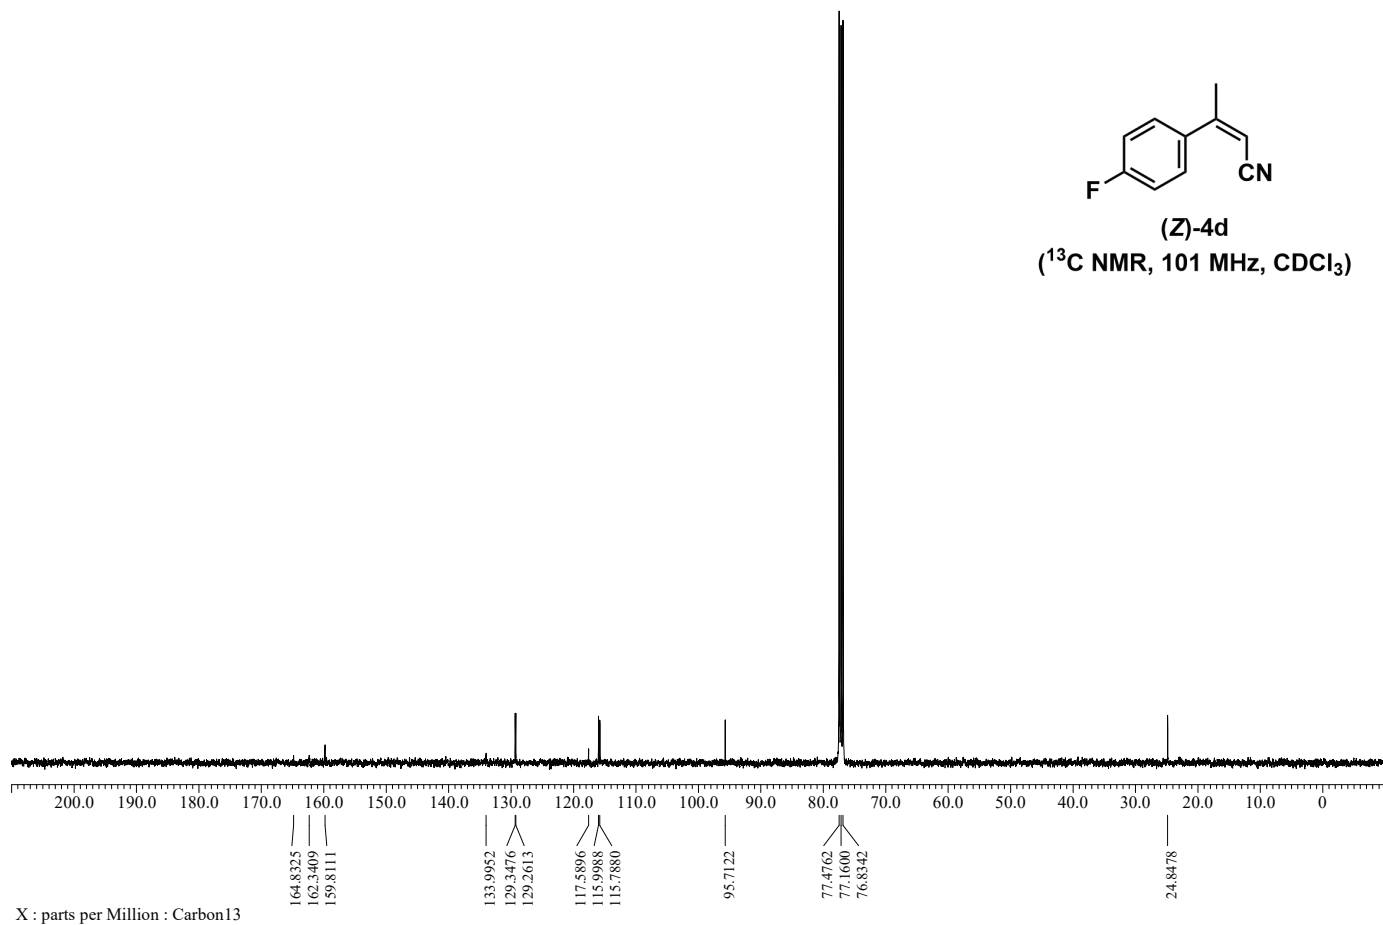

X : parts per Million : Carbon13

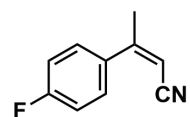

(Z)-4d  
(<sup>19</sup>F NMR, 376 MHz, CDCl<sub>3</sub>)

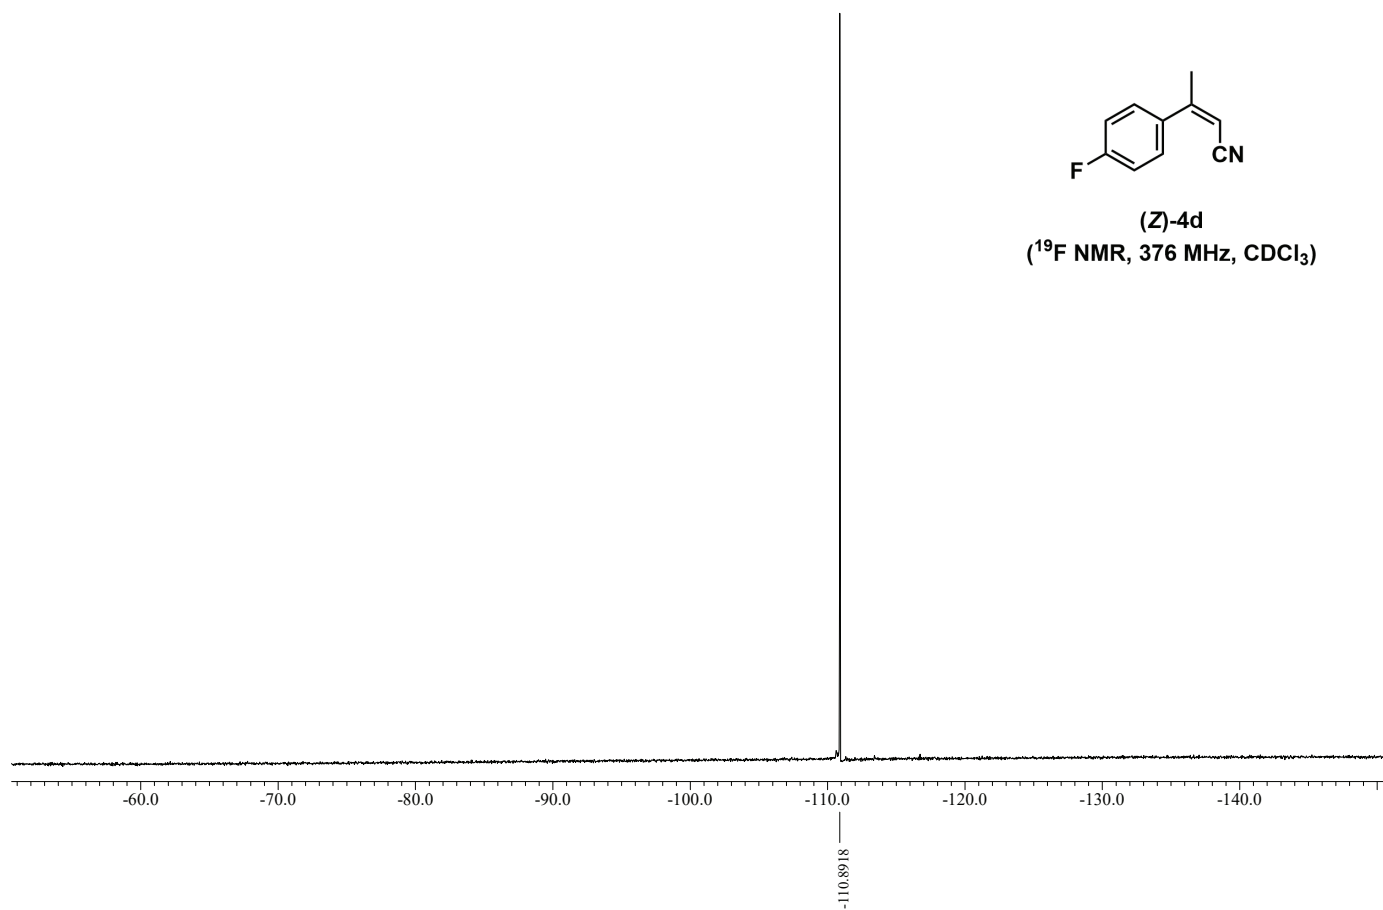

X : parts per Million : Fluorine19

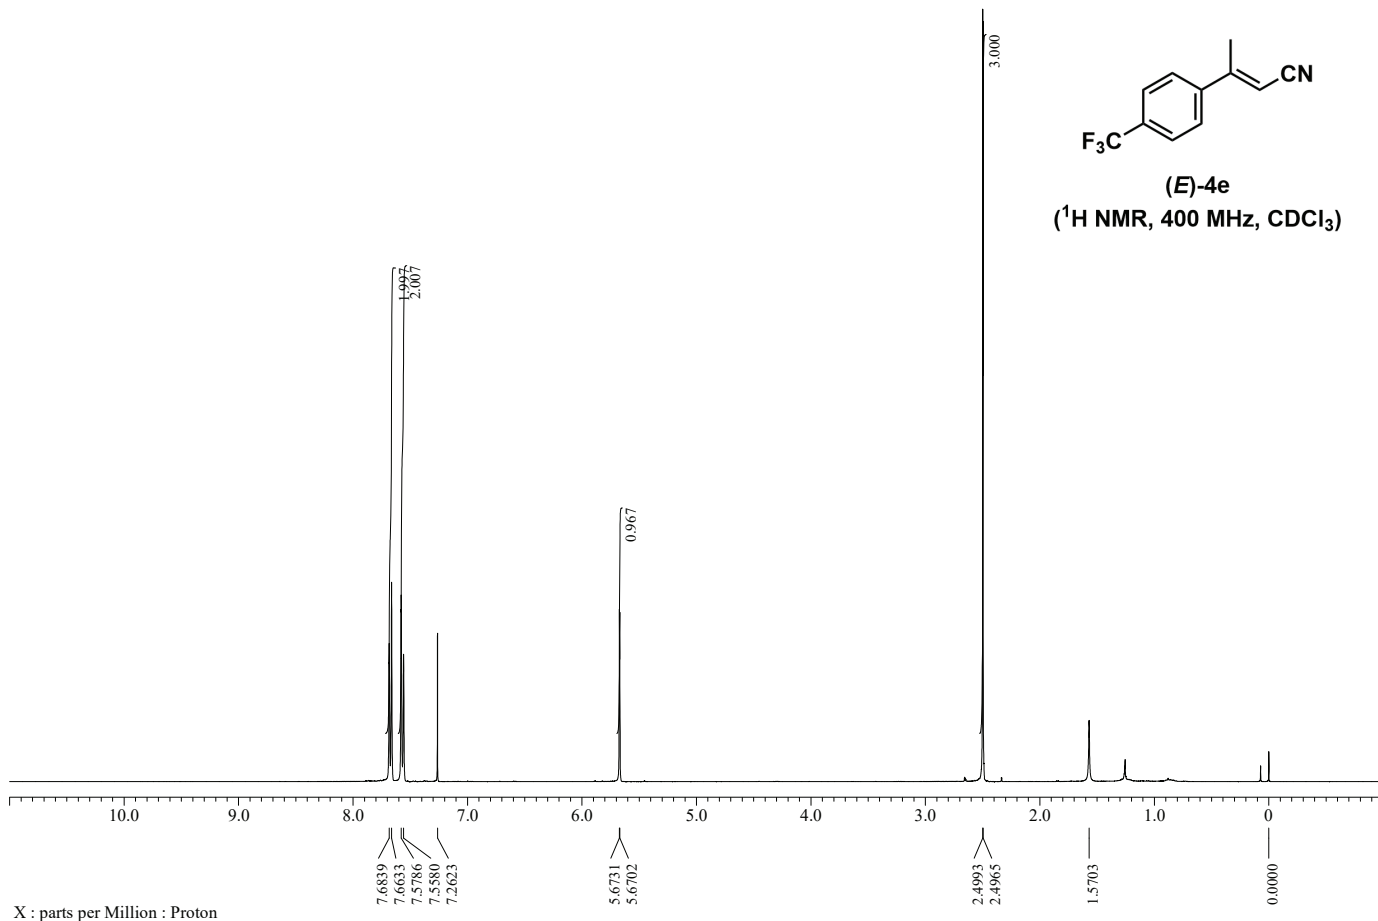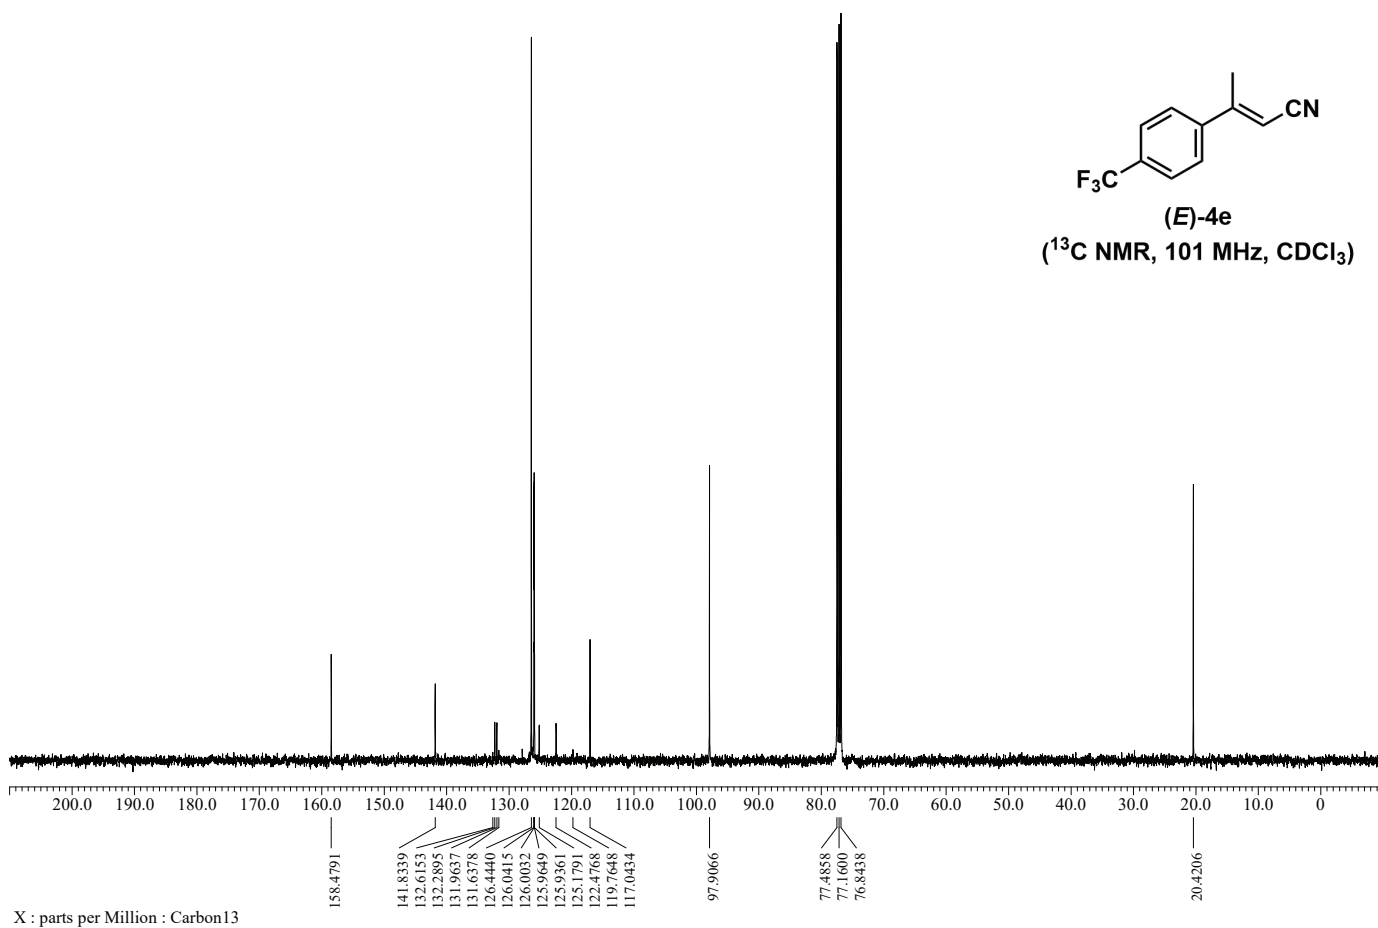



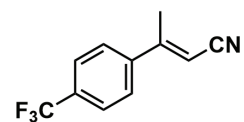

(E)-4e  
(<sup>19</sup>F NMR, 376 MHz, CDCl<sub>3</sub>)

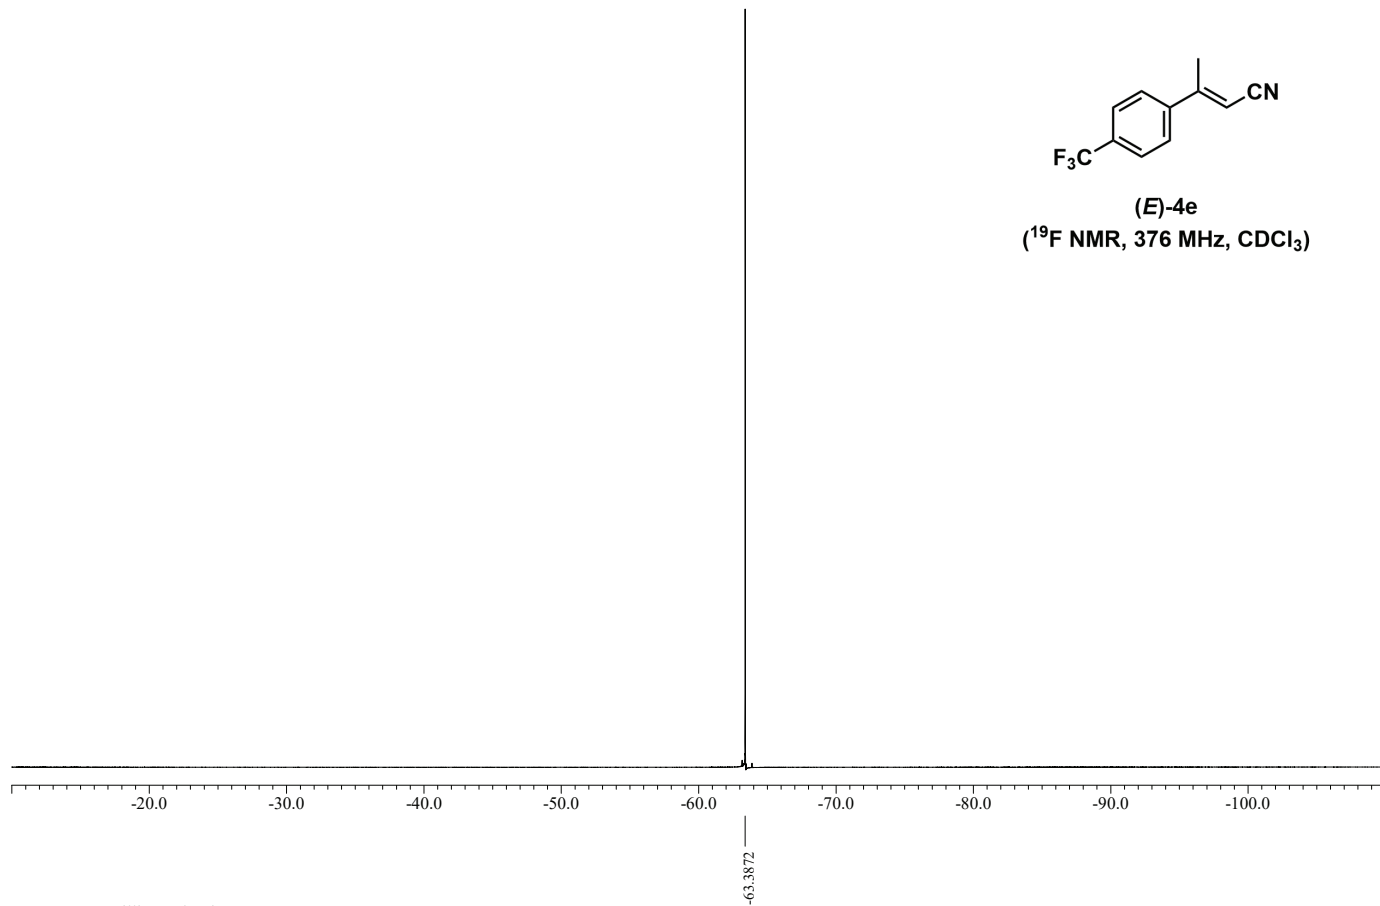

X : parts per Million : Fluorine19

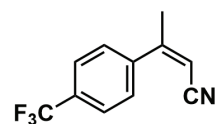

(Z)-4e  
(<sup>1</sup>H NMR, 400 MHz, CDCl<sub>3</sub>)

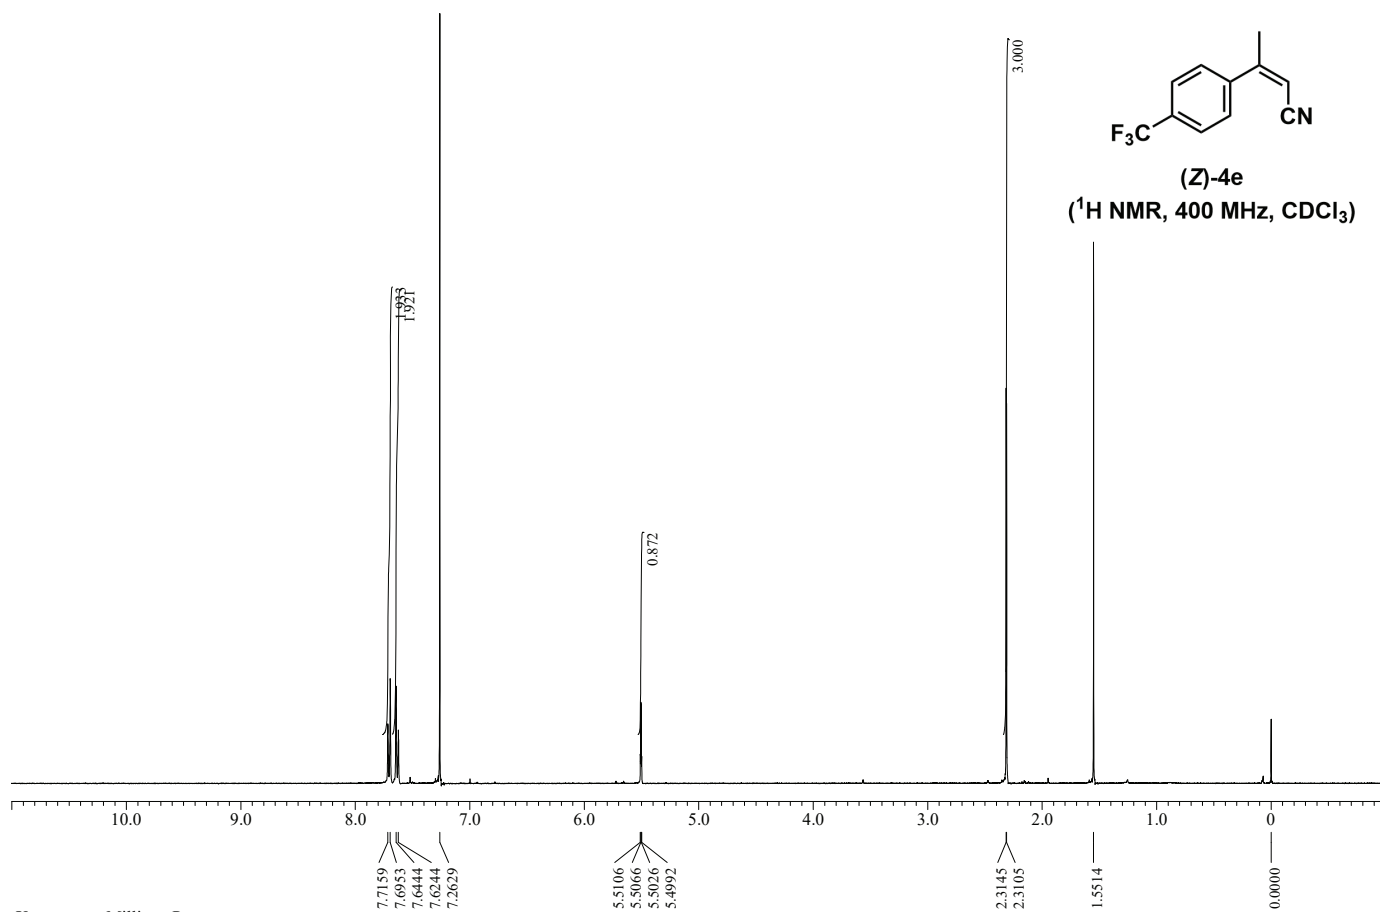

X : parts per Million : Proton

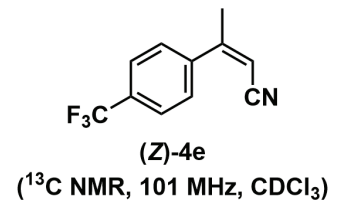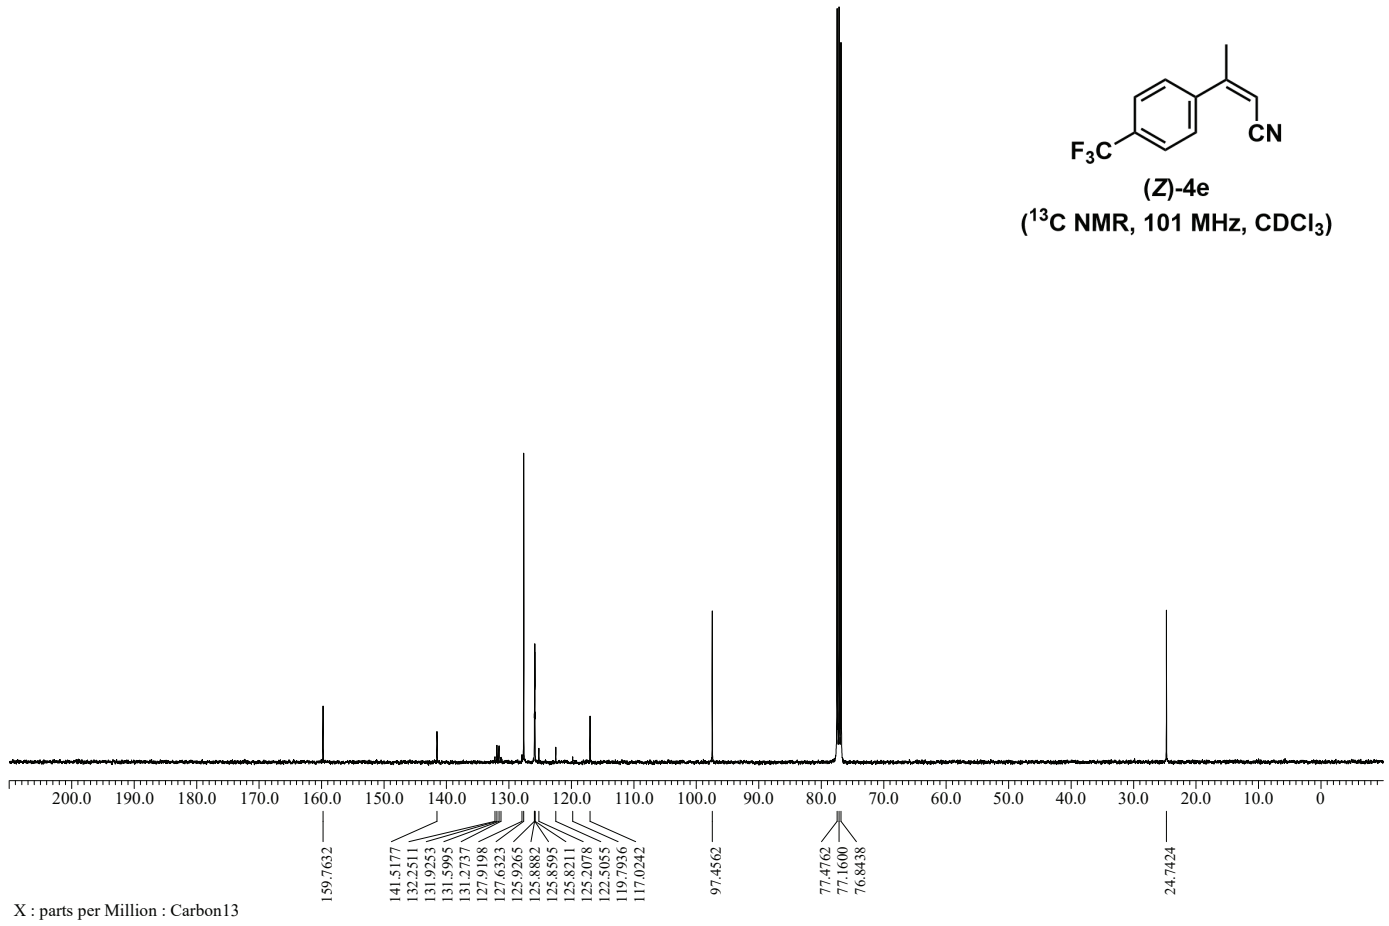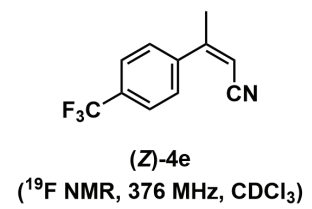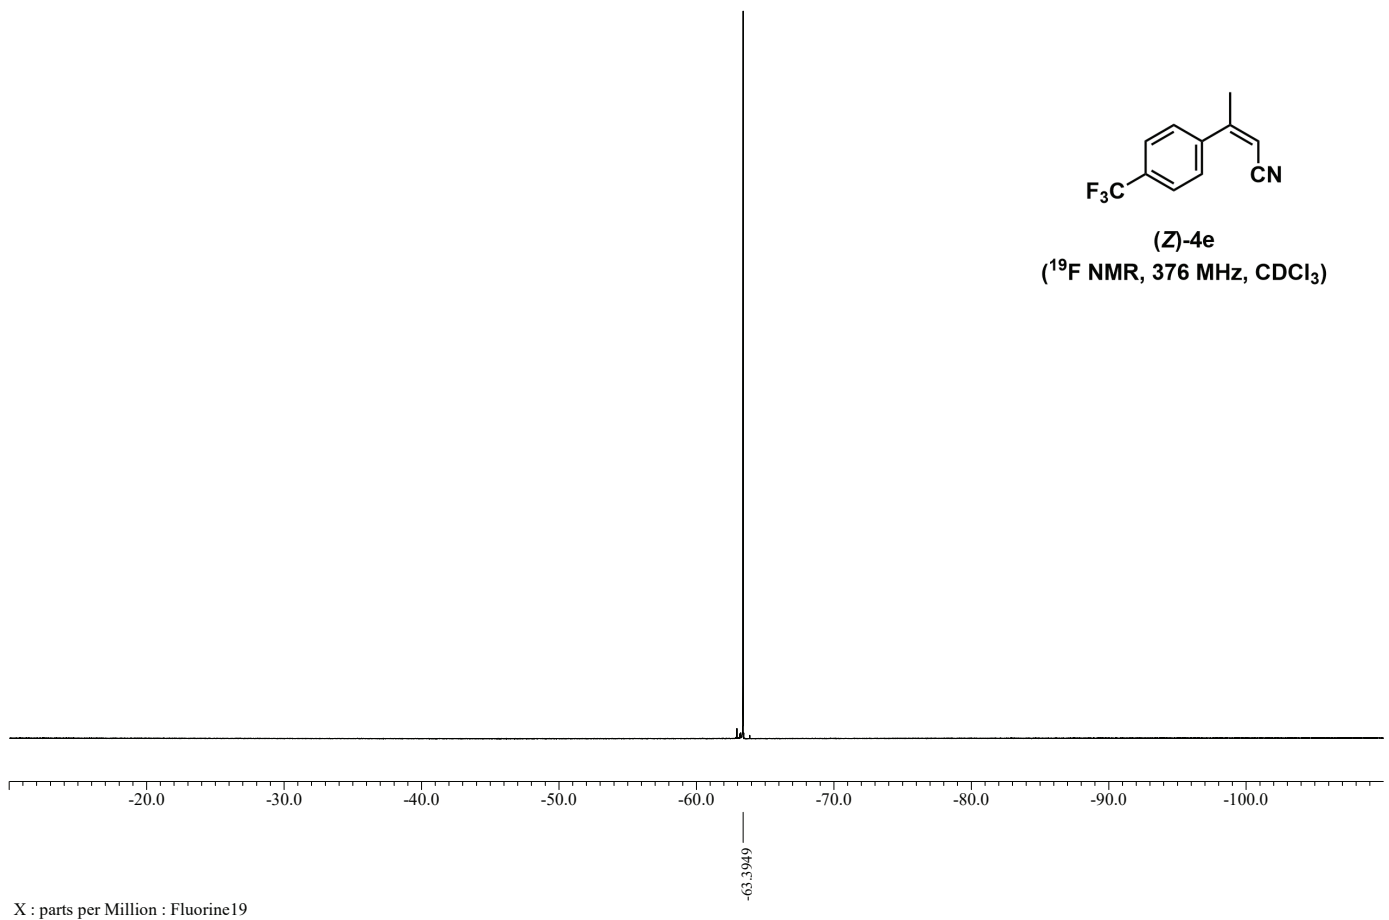

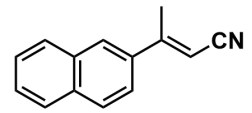

(E)-4f  
(<sup>1</sup>H NMR, 400 MHz, CDCl<sub>3</sub>)

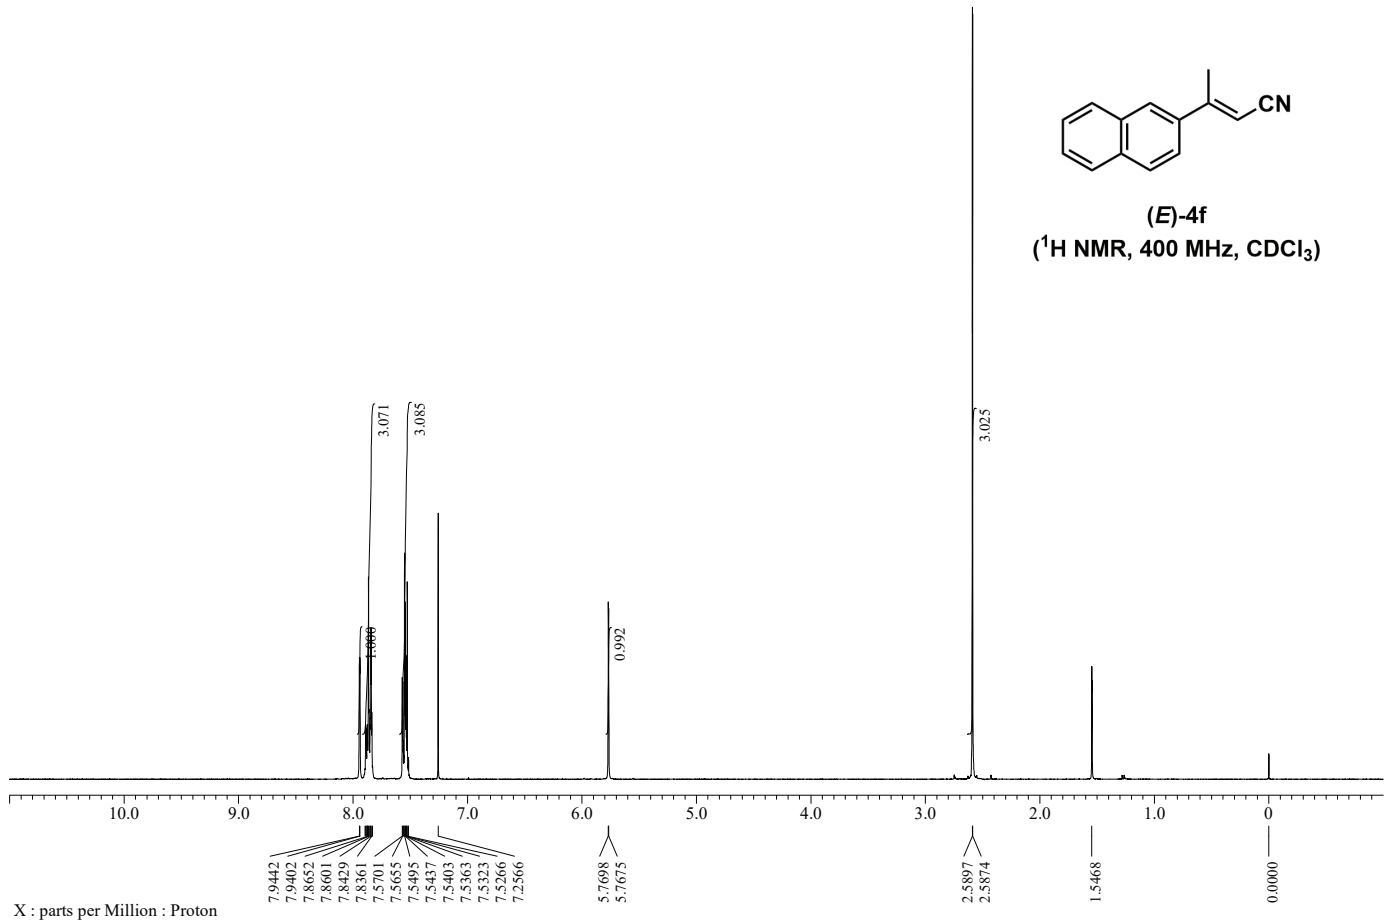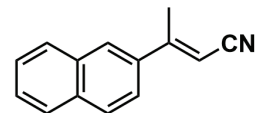

(E)-4f  
(<sup>13</sup>C NMR, 101 MHz, CDCl<sub>3</sub>)

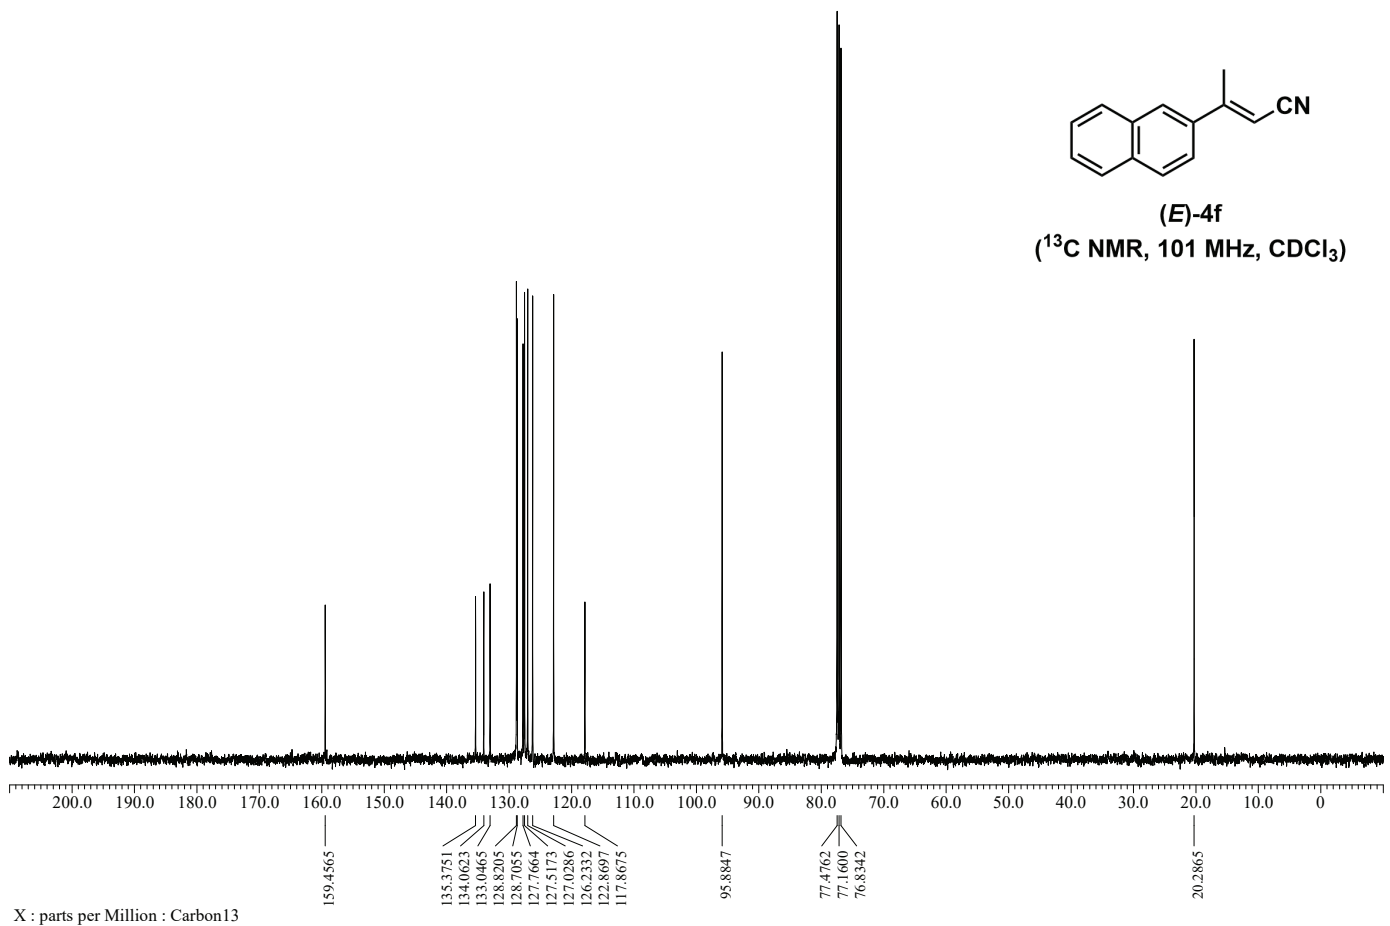

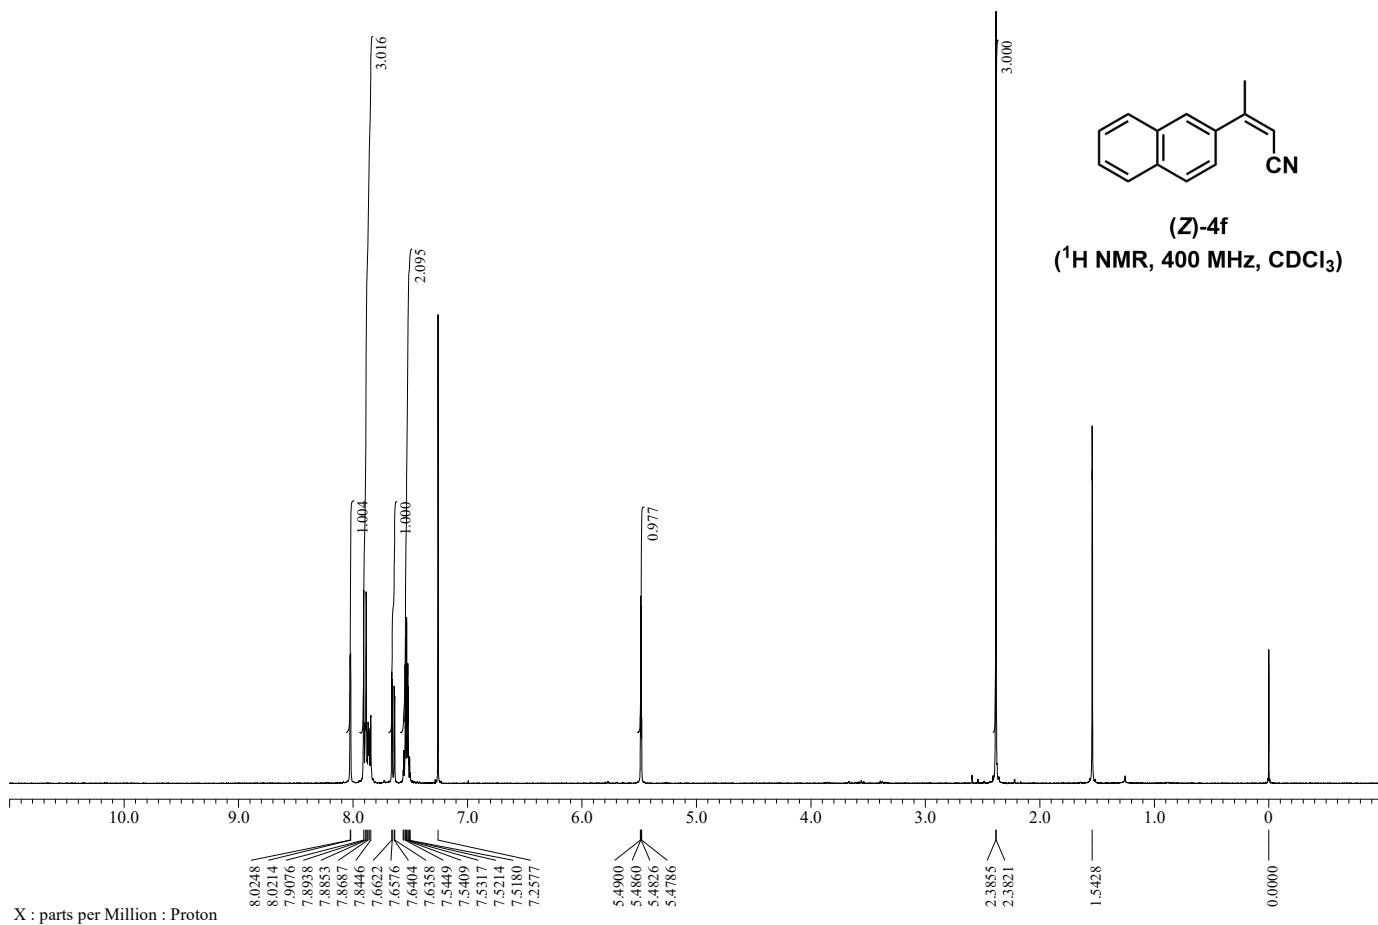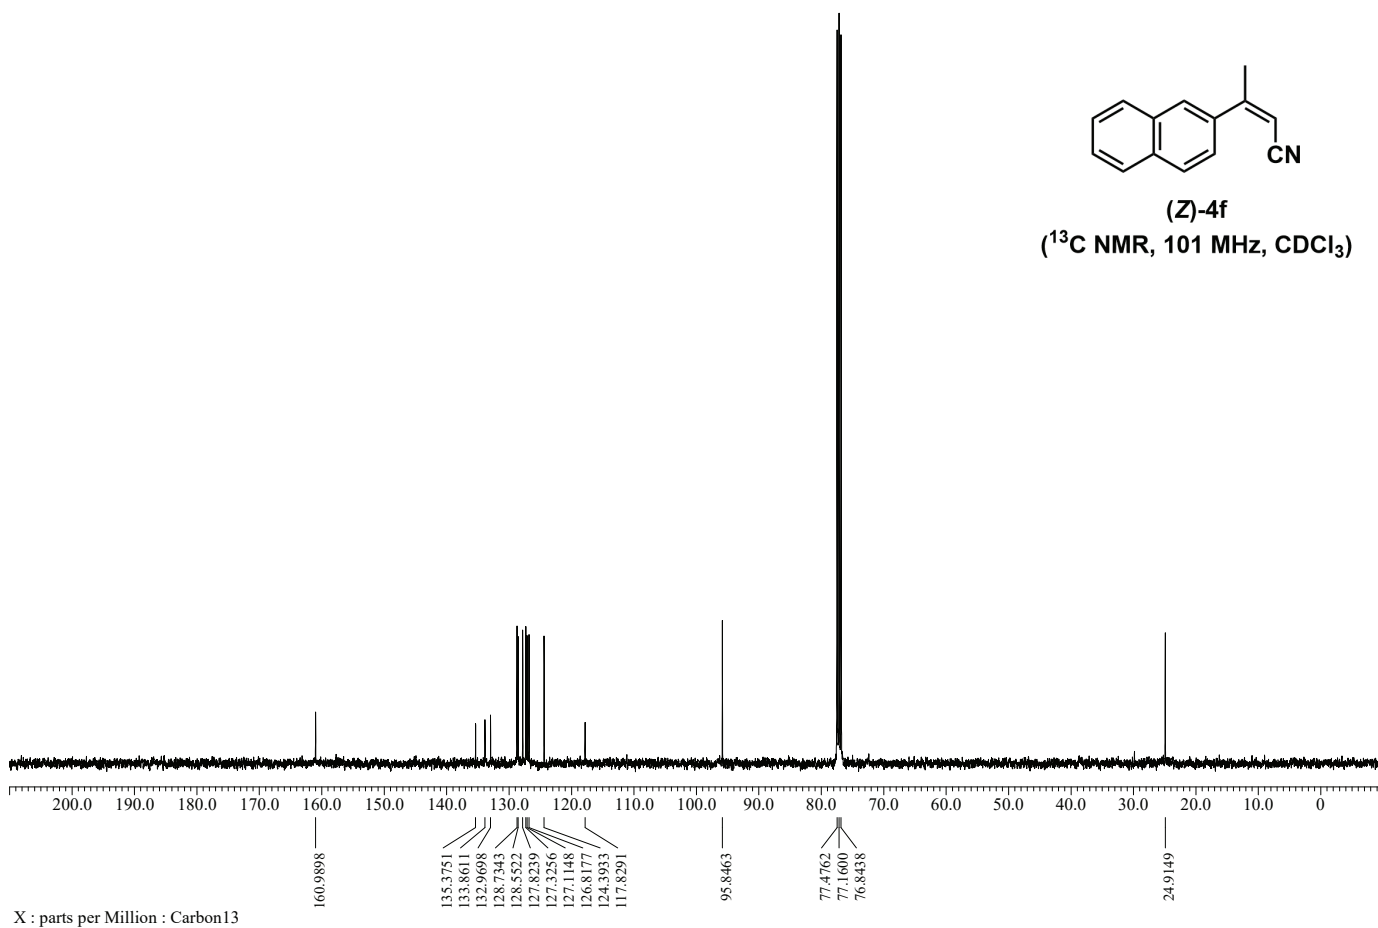

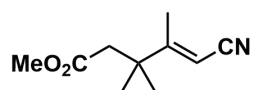

(E)-4g  
(<sup>1</sup>H NMR, 400 MHz, CDCl<sub>3</sub>)

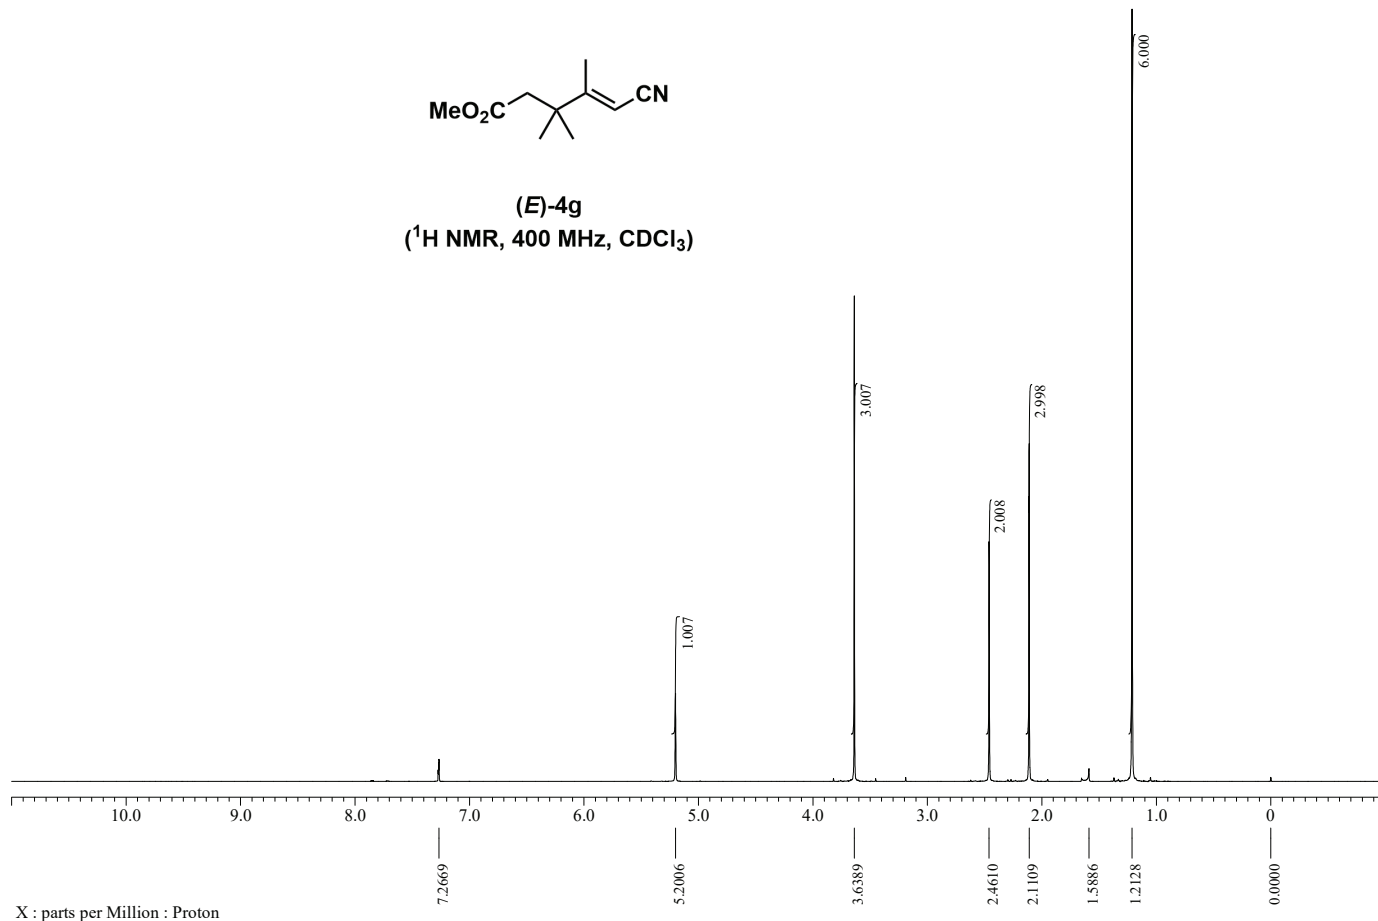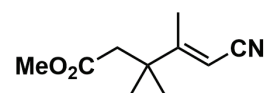

(E)-4g  
(<sup>13</sup>C NMR, 101 MHz, CDCl<sub>3</sub>)

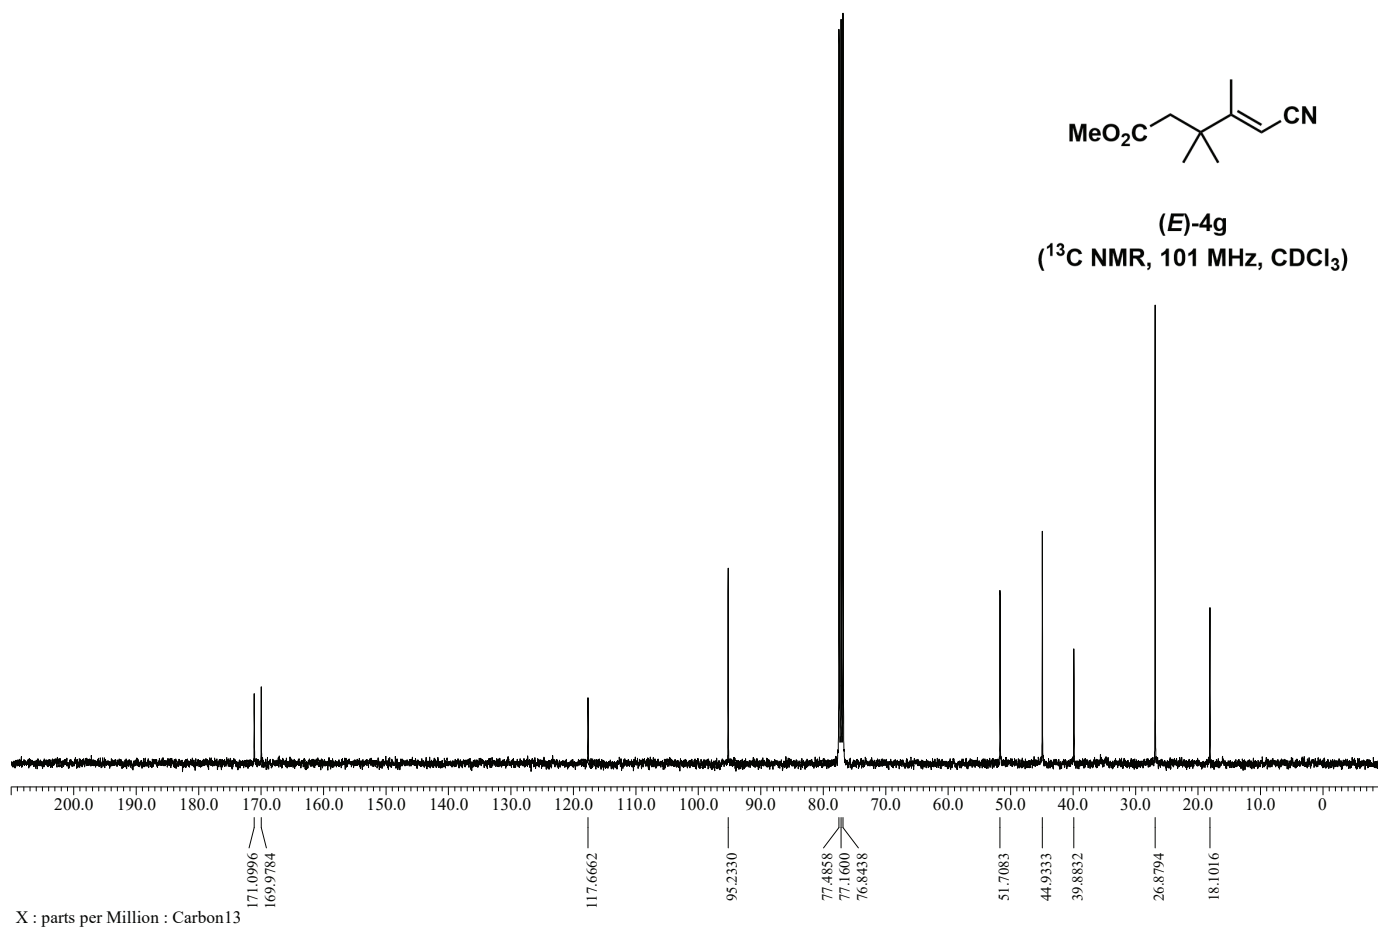

Supplement: d2cc00342b1.pdf [file d2cc00342b1.pdf]
